# Supplementary material for: Reduced-dimensional surface hopping with offline–online computations
Source: Royal Society of Chemistry journal article supplement (doi:10.1039/d1cp03446d), 2021-01-01
Supplement: d1cp03446d2.pdf [file d1cp03446d2.pdf]

# Supporting Information:

## Reduced-dimensional surface hopping with offline–online computations

Zachary Morrow,<sup>†</sup> Hyuk-Yong Kwon,<sup>‡</sup> C. T. Kelley,<sup>\*,†</sup> and Elena Jakubikova<sup>\*,‡</sup>

<sup>†</sup>*Department of Mathematics, North Carolina State University, Raleigh, NC 27695*

<sup>‡</sup>*Department of Chemistry, North Carolina State University, Raleigh, NC 27695*

E-mail: tim\_kelley@ncsu.edu; ejakubi@ncsu.edu

# Contents

|          |                                                      |             |
|----------|------------------------------------------------------|-------------|
| <b>1</b> | <b>Interpolation</b>                                 | <b>S-3</b>  |
| 1.1      | One dimension: trigonometric interpolation . . . . . | S-3         |
| 1.2      | One dimension: Clenshaw–Curtis . . . . .             | S-4         |
| 1.3      | Full tensor . . . . .                                | S-5         |
| 1.4      | Sparse interpolation . . . . .                       | S-6         |
| <b>2</b> | <b>Details of electronic structure calculations</b>  | <b>S-8</b>  |
| 2.1      | Example 1: linear structure ( $S_0$ ) . . . . .      | S-9         |
| 2.2      | Example 2: nonlinear structure ( $S_0$ ) . . . . .   | S-11        |
| 2.3      | Example 3: excited states . . . . .                  | S-13        |
| <b>3</b> | <b>Final refinement</b>                              | <b>S-14</b> |
| <b>4</b> | <b>Animations</b>                                    | <b>S-15</b> |
|          | <b>References</b>                                    | <b>S-16</b> |

# 1 Interpolation

This section has been published as Supporting Information before,<sup>S1</sup> but we include it here for completeness and for the reader's convenience.

Sparse interpolation is a linear combination of full-tensor interpolation. Therefore, we begin by defining the specific one-dimensional rules, followed by the full-tensor interpolation operators.

## 1.1 One dimension: trigonometric interpolation

In one dimension, we have  $m(l) = 3^l$  nodes at each level  $l \geq 0$ .<sup>S2</sup> The trigonometric interpolation nodes are

$$x_j^l = \frac{j-1}{m(l)}, \quad 1 \leq j \leq m(l), \quad l \geq 0.$$

The basis functions are more complicated. Trigonometric interpolation with  $2n+1$  points can resolve all modes up to mode  $n$ , so each frequency will have two associated nodes. Therefore, we begin by defining

$$\sigma(j) = \begin{cases} j/2, & j \text{ even} \\ -(1+j)/2, & j \text{ odd} \end{cases},$$

$$\phi_j(x) = \exp(2\pi i \cdot \sigma(j) \cdot x),$$

where  $i^2 = -1$  (in Roman font). The one-dimensional interpolant of  $f : [0, 1] \rightarrow \mathbb{R}$  is

$$\mathcal{U}^l[f](x) = \sum_{j=1}^{m(l)} \text{Re}(c_j^l \phi_j(x))$$

where the interpolation coefficients  $c_j^l$  are

$$c_j^l = \frac{1}{m(l)} \sum_{p=1}^{m(l)} f(x_p^l) \phi_j^*(x_p^l), \quad 1 \leq j \leq m(l),$$

which is a normalized discrete Fourier transform. Here,  $\phi_j^*$  denotes the complex conjugate of  $\phi_j$ . Trigonometric interpolation converges uniformly as  $l \rightarrow \infty$  as long as the target function  $f$  is periodic and uniformly continuous, and the convergence rate is faster as  $f$  gets smoother.<sup>S2</sup>

## 1.2 One dimension: Clenshaw–Curtis

The number of Clenshaw–Curtis points on level  $l \geq 0$  is<sup>S3,S4</sup>

$$m(l) = \begin{cases} 1, & l = 0 \\ 2^l + 1, & l > 0 \end{cases}$$

and the points themselves are given by

$$x_j^l = \begin{cases} 0, & l = 0 \\ -\cos\left(\frac{j-1}{m(l)-1} \pi\right), & 1 \leq j \leq m(l), l > 0 \end{cases}.$$

The basis functions are Lagrange polynomials, defined as

$$\phi_i^l(x) = \prod_{j=1, j \neq i}^{m(l)} \frac{x - x_j}{x_i - x_j}, \quad i = 1, \dots, m(l)$$

which have the convenient property that  $\phi_i(x_j) = \delta_{ij}$ . With that property, it readily follows that the Clenshaw–Curtis interpolant of  $f : [-1, 1] \rightarrow \mathbb{R}$  is

$$\mathcal{U}^l[f] = \sum_{j=1}^{m(l)} c_j^l \phi_j^l(x) \quad c_j^l = f(x_j^l).$$

Polynomial interpolation is exact for all polynomials of degree up to  $m(l) - 1$ . Clenshaw–Curtis interpolation converges uniformly as  $l \rightarrow \infty$  as long as  $f$  is uniformly continuous, and the convergence rate gets faster as  $f$  becomes smoother.<sup>S2,S5</sup>

### 1.3 Full tensor

Let  $\mathbf{i} \in \mathbb{N}_0^d$  be a multi-index drawn from the natural numbers including zero. For full-tensor interpolation, we have  $m(i_k)$  points in dimension  $k$ , and we take the grid as the tensor product of one-dimensional grids at level  $i_k$ :

$$\{\mathbf{x}_j^{\mathbf{i}}\} = \bigotimes_{k=1}^d \{x_{j_k}^{i_k}\},$$

which gives a lattice structure as the grid. Let

$$\phi_{\mathbf{j}}(\mathbf{x}) = \prod_{k=1}^d \phi_{j_k}(x_k), \quad \mathbf{j} \in \mathbb{N}_0^d, \quad \mathbf{x} \in \mathbb{R}^d,$$

where  $\phi_{j_k}$  are the one-dimensional basis functions of your interpolation rule. The full-tensor interpolant of  $f(\mathbf{x})$  is

$$\mathcal{U}^{\mathbf{i}}[f](\mathbf{x}) = \sum_{j_1=1}^{m(i_1)} \cdots \sum_{j_d=1}^{m(i_d)} c_{\mathbf{j}}^{\mathbf{i}} \phi_{\mathbf{j}}^{\mathbf{i}}(\mathbf{x}), \quad (1)$$

where the full-tensor interpolation coefficients  $c_{\mathbf{j}}^{\mathbf{i}}$  are

$$c_{\mathbf{j}}^{\mathbf{i}} = \frac{1}{\prod_{k=1}^d m(i_k)} \sum_{p_1=1}^{m(i_1)} \cdots \sum_{p_d=1}^{m(i_d)} f(\mathbf{x}_{\mathbf{p}}^{\mathbf{i}}) \phi_{\mathbf{j}}^*(\mathbf{x}_{\mathbf{p}}^{\mathbf{i}}) \quad (\text{trigonometric})$$

$$c_{\mathbf{j}}^{\mathbf{i}} = f(\mathbf{x}_{\mathbf{j}}^{\mathbf{i}}) \quad (\text{polynomial})$$

To express  $\mathcal{U}^{\mathbf{i}}[f]$  in adjoint form, we note that a linear operator  $\mathcal{L}$  gets applied to the data  $f(\mathbf{x}_{\mathbf{j}}^{\mathbf{i}})$  to produce  $c_{\mathbf{j}}^{\mathbf{i}}$ . For polynomial interpolation,  $\mathcal{L}$  is the identity operator; for trigonometric interpolation,  $\mathcal{L}$  is the discrete Fourier transform. Thus, for polynomial interpolation,

the adjoint form is identical to the form already presented. For trigonometric interpolation, however, we get

$$\mathcal{U}^i[f] = \langle \mathbf{c}, \phi(\mathbf{x}) \rangle = \langle \mathcal{L}\mathbf{f}, \phi(\mathbf{x}) \rangle = \langle \mathbf{f}, \mathcal{L}^* \phi(\mathbf{x}) \rangle = \langle \mathbf{f}, \mathcal{L}\phi(\mathbf{x}) \rangle$$

where the last equality is justified since we take only the real part of the interpolant. So the adjoint functions  $\psi_j^i(\mathbf{x})$  are a discrete Fourier transform of the basis functions  $\phi_j^i(\mathbf{x})$ , and we get

$$\mathcal{U}^i[f](\mathbf{x}) = \sum_{j_1=1}^{m(i_1)} \cdots \sum_{j_d=1}^{m(i_d)} f(\mathbf{x}_j^i) \psi_j^i(\mathbf{x}).$$

## 1.4 Sparse interpolation

We first define the following relation between multi-indices:

$$\mathbf{i} \leq \mathbf{j} \iff i_k \leq j_k \quad \forall 1 \leq k \leq d.$$

The most general form of a sparse interpolation operator is

$$G_\Theta = \sum_{\mathbf{i} \in \Theta} t_i \mathcal{U}^i$$

where  $\mathcal{U}^i$  is defined in Equation (1),  $\Theta$  is a lower set,<sup>1</sup> and

$$\sum_{\mathbf{i} \leq \mathbf{j}, \mathbf{j} \in \Theta} t_j = 1, \quad \forall \mathbf{i} \in \Theta.$$

To find  $\Theta$ , we first begin with a desired exactness space  $\Lambda(L)$ , which is also lower set. The set  $\Lambda(L)$  contains the frequencies/degrees for which  $G_\Theta$  should be exact. In this paper, we have taken

$$\Lambda^\alpha(L) = \{\mathbf{i} \in \mathbb{N}_0^d \mid \boldsymbol{\alpha} \cdot \mathbf{i} \leq L\} \tag{2}$$

---

<sup>1</sup>A set of multi-indices  $S \subset \mathbb{N}_0^d$  is *lower* if and only if, for each  $\mathbf{x} \in S$ , we have  $\{\mathbf{y} \in \mathbb{N}_0^d \mid \mathbf{y} \leq \mathbf{x}\} \subset S$ .

where  $\boldsymbol{\alpha}$  is the anisotropy vector. For the mixed-basis grid, we used  $\boldsymbol{\alpha} = (1, 2, 2)$  on the trigonometric part and  $\boldsymbol{\alpha} = \mathbf{1}$  on the polynomial part.<sup>2</sup> After defining  $\Lambda(L)$ , we construct the optimal  $\Theta$  as<sup>S2,S4</sup>

$$\begin{aligned}\Theta_{opt}(L) &= \{\mathbf{i} \in \mathbb{N}_0^d \mid \mathbf{m}(\mathbf{i} - \mathbf{1}) \in \Lambda(L)\} && \text{(polynomial)} \\ \Theta_{opt}(L) &= \{\mathbf{i} \in \mathbb{N}_0^d \mid (\mathbf{m}(\mathbf{i} - \mathbf{1}) + \mathbf{1})/2 \in \Lambda(L)\} && \text{(trigonometric)}\end{aligned}$$

where  $(\mathbf{m}(\mathbf{i}))_k = m(i_k)$ .

By defining the set of all sparse grid indices

$$\Theta_m = \bigcup_{\mathbf{i} \in \Theta} \{\mathbf{j} \in \mathbb{N}_0^d \mid \mathbf{1} \leq \mathbf{j} \leq \mathbf{m}(\mathbf{i})\}$$

and using either the internal or adjoint form of  $\mathcal{U}^i$ , we can also write  $G_\Theta[f]$  as

$$G_\Theta[f] = \sum_{\mathbf{j} \in \Theta_m} w_j \phi_j(\mathbf{x}) = \sum_{\mathbf{j} \in \Theta_m} f(\mathbf{x}_j) \tilde{\psi}_j(\mathbf{x})$$

where

$$w_j = \sum_{\substack{\mathbf{i} \in \Theta, \\ \mathbf{j} \leq \mathbf{m}(\mathbf{i})}} t_i c_j^i, \quad \tilde{\psi}_j^i(\mathbf{x}) = \sum_{\substack{\mathbf{i} \in \Theta, \\ \mathbf{j} \leq \mathbf{m}(\mathbf{i})}} t_i \psi_j^i(\mathbf{x}).$$

---

<sup>2</sup>We did not conjure up these values *a priori*; we iteratively arrived at them as a result of refining the grid (see Section 3 below).

## 2 Details of electronic structure calculations

All  $S_0$  electronic structure calculations occur in Gaussian 16. We have included two example input files, corresponding to a linear and nonlinear structure. The difference between the two is that the `modredundant` section includes the L keyword for linear structures. For nonlinear structures, we use A and D instead of L.

All calculations of excitation energies and nonadiabatic coupling vectors occur in Orca as some of them employ open-shell ground state as a reference, for which the TD-DFT and CIS implementations in Orca are more suitable.



## 2.1 Example 1: linear structure ( $S_0$ )

```
%chk=chkfiles/scan_zmat_1.chk
%mem=32GB
%nprocshared=16
# stable=opt b3lyp/6-311g(d) pop=always integral=grid=ultrafine
scf=(xqc,vtl,maxconventionalcycles=512) symmetry=none

azomethane stability 1

O 1
N      0.00000000    0.00000000    0.00000000
N      1.21001503    0.00000000    0.00000000
C      1.94413820    1.36087129    0.00000000
C     -1.80000000    0.00000000    0.00000000
H      3.01529271    1.16666079    0.00000000
H      1.65967212    1.92152238   -0.89311136
H      1.65967124    1.92152000    0.89311218
H     -2.30534096    0.96713099    0.00000000
H     -1.92067884   -0.57054140   -0.90903927
H     -1.92068356   -0.57054030    0.90903849

--Link1--
%chk=chkfiles/scan_zmat_1.chk
%mem=32GB
%nprocshared=16
# opt=(newton,tight,modredundant,maxstep=1,call, maxcycles=30)
geom=check guess=read b3lyp/6-311g(d) pop=always integral=grid=ultrafine
scf=(xqc,vtl,maxconventionalcycles=512) symmetry=none

azomethane opt 1

O 1

B 1 4 F
D 1 2 3 5 F
L 2 1 4 3 F
D 8 4 1 3 F

--Link1--
%chk=chkfiles/scan_zmat_1.chk
%mem=32GB
%nprocshared=16
# stable=opt geom=check guess=read b3lyp/6-311g(d) pop=always
```

```
integral=grid=ultrafine scf=(xqc,vtl,maxconventionalcycles=512)
symmetry=none

azomethane stability 2

0 1

--Link1--
%chk=chkfiles/scan_zmat_1.chk
%mem=32GB
%nprocshared=16
# opt=(newton,tight,modredundant,maxstep=1,calcall,maxcycles=30) freq
guess=read geom=check b3lyp/6-311g(d) pop=always integral=grid=ultrafine
scf=(xqc,vtl,maxconventionalcycles=512) symmetry=none

azomethane opt 2

0 1

--Link1--
%chk=chkfiles/scan_zmat_1.chk
%mem=32GB
%nprocshared=16
# stable=opt geom=check guess=read b3lyp/6-311g(d) pop=always
integral=grid=ultrafine scf=(xqc,vtl,maxconventionalcycles=512)
symmetry=none

azomethane stability 3

0 1
```

## 2.2 Example 2: nonlinear structure ( $S_0$ )

```
%chk=chkfiles/scan_zmat_2.chk
%mem=32GB
%nprocshared=16
# stable=opt b3lyp/6-311g(d) pop=always integral=grid=ultrafine
scf=(xqc,vtl,maxconventionalcycles=512) symmetry=none

azomethane stability 1

0 1
N      0.00000000    0.00000000    0.00000000
N      1.23874400    0.00000000    0.00000000
C      1.80434700    1.38280600    0.00000000
C      0.00000000   -1.80000000    0.00000000
H      2.89084000    1.30705300    0.00000000
H      1.47283200    1.92607900   -0.88854700
H      1.47283200    1.92607900    0.88854700
H     -1.02105000   -2.18591100    0.00000000
H      0.54010800   -2.04428300   -0.90535200
H      0.54010800   -2.04428300    0.90535200

--Link1--
%chk=chkfiles/scan_zmat_2.chk
%mem=32GB
%nprocshared=16
# opt=(newton,modredundant,maxstep=1,calcall,maxcycles=30) geom=check
guess=read b3lyp/6-311g(d) pop=always integral=grid=ultrafine
scf=(xqc,vtl,maxconventionalcycles=512) symmetry=none

azomethane opt 1

0 1

B 1 4 F
D 1 2 3 5 F
D 4 1 2 3 F
A 2 1 4 F
D 8 4 1 2 F

--Link1--
%chk=chkfiles/scan_zmat_2.chk
%mem=32GB
%nprocshared=16
```

```

# stable=opt geom=check guess=read b3lyp/6-311g(d) pop=always
integral=grid=ultrafine scf=(xqc,vtl,maxconventionalcycles=512)
symmetry=none

azomethane stability 2

0 1

--Link1--
%chk=chkfiles/scan_zmat_2.chk
%mem=32GB
%nprocshared=16
# opt=(newton,modredundant,maxstep=1,calcall,maxcycles=30) freq
guess=read geom=check b3lyp/6-311g(d) pop=always integral=grid=ultrafine
scf=(xqc,vtl,maxconventionalcycles=512) symmetry=none

azomethane opt 2

0 1

--Link1--
%chk=chkfiles/scan_zmat_2.chk
%mem=32GB
%nprocshared=16
# stable=opt geom=check guess=read b3lyp/6-311g(d) pop=always
integral=grid=ultrafine scf=(xqc,vtl,maxconventionalcycles=512)
symmetry=none

azomethane stability 3

0 1

```

## 2.3 Example 3: excited states

The Orca input file `azo.inp` (with stability checks) is shown below:

```
!B3LYP 6-311g(d) TightSCF
%CIS
  HFNacme true
END
%SCF
  MaxIter 100
  HFType UHF
  STABPerform true
END
%TDDFT
  NROOTS 10
END
* xyzfile 0 1 geomfiles/azo.xyz
```

The file `geomfiles/azo.xyz` contains the geometry specified in Cartesian coordinates:

```
10
azomethane
  N      0.00000000    0.00000000    0.00000000
  N      1.22915061    0.00000000    0.00000000
  C      1.87275627    1.37687217    0.00000000
  C      -1.61279073    0.01401353   -0.00653607
  H      2.62923902    1.39536387   -0.79264170
  H      1.13534982    2.18398066   -0.12897983
  H      2.39160980    1.47760052    0.95776512
  H      -1.88615071    0.21731351    1.02800251
  H      -1.91964069    0.83289353   -0.66933412
  H      -1.97129227   -0.96664721   -0.33283514
```

### 3 Final refinement

Table S1 shows the parameters used in the mixed-basis grid after all refinement was completed. Table S2 contains the stationary points and energies (relative to the *trans*- minimum) for the final mixed-basis grid. These stationary points were calculated on the unrestricted  $S_0$  PES. The energy relative to the global minimum is within  $\sim 5\%$  or 1 kcal/mol of the Gaussian-optimized value. Furthermore, since the predicted mixed-basis energies are all smaller than the Gaussian-optimized values, the relative barriers remain comparable.

Table S1: Specification of final grids.

| Trig grid                         | Polynomial grid                    |
|-----------------------------------|------------------------------------|
| $d = 3$                           | $d = 2$                            |
| $L = 5$                           | $L = 8$                            |
| $\boldsymbol{\alpha} = (1, 2, 2)$ | $\boldsymbol{\alpha} = \mathbf{1}$ |

Table S2: Locations of minima and transition states, as well as energy barriers relative to the *trans*- minimum on the unrestricted  $S_0$  surface.

| Structure              | Surrogate | Optimized $\mathbf{q}$                  | $\Delta E$ (kcal/mol) |
|------------------------|-----------|-----------------------------------------|-----------------------|
| <i>trans</i> - minimum | Gaussian  | [180.00, 122.20, 122.20, 1.46, 113.00]  | 0                     |
|                        | mixed     | [-179.71, 121.91, 121.84, 1.46, 116.06] | 0                     |
| <i>cis</i> - minimum   | Gaussian  | [0.00, -119.38, -60.33, 1.48, 120.21]   | 10.48                 |
|                        | mixed     | [0.95, -118.43, -50.84, 1.49, 124.18]   | 9.57                  |
| Inversion TS           | Gaussian  | [-180.00, -97.52, 121.18, 1.39, 180.00] | 51.02                 |
|                        | mixed     | [-92.16, 123.10, 121.72, 1.40, 180.00]  | 50.12                 |
| Torsion TS             | Gaussian  | [-89.50, 145.77, 55.27, 1.47, 117.79]   | 45.71                 |
|                        | mixed     | [-87.46, 138.92, 141.04, 1.46, 118.78]  | 43.16                 |

## 4 Animations

A suite of animations is in a ZIP archive as part of the ESI. Each of these animations used the mixed interpolation basis with the final level of refinement (7215 nodes).

Five of these animations, named `XQ_i.mp4`, where  $i$  ranges from 1 to 5, are animations of each geometry component at a slice chosen from a uniform distribution. Each file animates a different design variable over its domain while holding the other slice components constant. The purpose of these five animations is to demonstrate visually the Cartesian geometry change as a function of the design variables, particularly when the  $N^2-N^1-C^4$  bond angle is larger than  $180^\circ$ . They also demonstrate the smoothly varying nature of  $\mathbf{X}(\mathbf{q})$  during rotation, dissociation, and inversion.

The file `nearly_linear.mp4` motivates our definition of  $q_2$  at nearly linear geometries. If we did not adjust for the changing dihedral in our definition of  $q_2$ , we would end up with a linear structure where the main dihedral rotation still produces changes in the geometry. Our definition of  $q_2$  prevents multivalued geometries in the limit  $q_5 \rightarrow 180$  by keeping the methyl group properly oriented.

Lastly, in `FSSH.mp4`, we animate one surface hopping trajectory. Hops occur at  $t = 150$  fs ( $S_1 \rightarrow S_0$ ),  $t = 151$  fs ( $S_0 \rightarrow S_1$ ),  $t = 155$  fs ( $S_1 \rightarrow S_0$ ),  $t = 410$  fs ( $S_0 \rightarrow S_1$ ), and  $t = 445$  fs ( $S_1 \rightarrow S_0$ ). The purpose of this animation is to show the reconstruction of the geometry as part of the MD run itself, rather than as isolated investigations of  $\mathbf{X}(\mathbf{q})$ . It also demonstrates relaxation to  $q_1 \approx \pm 90$  on  $S_1$ , followed by relaxation to a minimum on  $S_0$  after hopping.

## References

- (S1) Morrow, Z.; Kwon, H.-Y.; Kelley, C. T.; Jakubikova, E. Efficient Approximation of Potential Energy Surfaces with Mixed-Basis Interpolation. *Submitted* **2021**, in review.
- (S2) Morrow, Z.; Stoyanov, M. A Method for Dimensionally Adaptive Sparse Trigonometric Interpolation of Periodic Functions. *SIAM J. Sci. Comput.* **2020**, *42*, A2436–A2460.
- (S3) Clenshaw, C. W.; Curtis, A. R. A Method for Numerical Integration on an Automatic Computer. *Numer. Math.* **1960**, *2*, 197–205.
- (S4) Stoyanov, M. K.; Webster, C. G. A Dynamically Adaptive Sparse Grids Method for Quasi-Optimal Interpolation of Multidimensional Functions. *Comput. Math. A* **2016**, *71*, 2449–2465.
- (S5) Gautschi, W. *Numerical Analysis*, 2nd ed.; Birkhäuser Basel, 2012.
