# Supplementary material for: Reduced-dimensional surface hopping with offline–online computations
Source: Royal Society of Chemistry journal article supplement (doi:10.1039/d1cp03446d), 2021-01-01
Supplement: d1cp03446d3.xlsx [file d1cp03446d3.xlsx]

## Sheet: PESs
Units:
	All q_i are in degrees, except q_4, which is in angstroms
	Energy is in kcal/mol, relative to global minimum on S0 (-189.319880798 hartrees)
	Cartesian coordinates are in angstroms (unrestricted-optimized geometries)
Node index	q_1	q_2	q_3	q_4	q_5	E (S0, UB3LYP)	E (S0, RB3LYP)	E (S1)	x_N1	y_N1	z_N1	x_N2	y_N2	z_N2	x_C2	y_C2	z_C2	x_C1	y_C1	z_C1	x_H1	y_H1	z_H1	x_H2	y_H2	z_H2	x_H3	y_H3	z_H3	x_H4	y_H4	z_H4	x_H5	y_H5	z_H5	x_H6	y_H6	z_H6
1	-180	-180	-180	1.8	180	77.2802	77.1891	114.634	0	0	0	1.2241	0	0	1.8988	1.3921	0	-1.8	0	0	2.9806	1.2484	0	1.591	1.9441	-0.89242	1.591	1.9441	0.89242	-2.2124	1.0062	0	-1.9622	-0.56232	-0.90947	-1.9622	-0.56231	0.90947
2	-180	-180	-180	1.8	90	26.1776	26.1291	100.015	0	0	0	1.2387	0	0	1.8043	1.3828	0	0	-1.8	0	2.8908	1.3071	0	1.4728	1.9261	-0.88855	1.4728	1.9261	0.88855	-1.021	-2.1859	0	0.54011	-2.0443	-0.90535	0.54011	-2.0443	0.90535
3	-180	-180	-180	1.8	270	61.8683	61.8345	111.721	0	0	0	1.2445	0	0	2.4105	0.86355	0	0	1.8	0	3.2709	0.19554	0	2.4658	1.4941	-0.89407	2.4658	1.4941	0.89407	0.97576	2.2283	0	-0.5626	2.1147	-0.88151	-0.5626	2.1147	0.88151
4	-180	-180	-180	1.8	116.36	17.1828	17.1204	88.8756	0	0	0	1.2138	0	0	1.7748	1.3778	0	-0.79923	-1.6128	0	2.8609	1.3024	0	1.4366	1.915	-0.88862	1.4366	1.915	0.88862	-1.85	-1.3464	0	-0.47201	-2.1154	-0.9064	-0.47201	-2.1154	0.9064
5	-180	-180	-180	1.8	243.64	19.9521	19.9043	96.4182	0	0	0	1.2145	0	0	2.0561	1.21	0	-0.79923	1.6128	0	3.0955	0.88779	0	1.8644	1.8115	-0.89221	1.8644	1.8115	0.89221	-0.10768	2.4475	0	-1.4129	1.577	-0.8967	-1.4129	1.577	0.8967
6	-180	-180	-180	1.8	96.8508	19.214	19.1587	94.3426	0	0	0	1.2292	0	0	1.7968	1.3785	0	-0.21471	-1.7871	0	2.8829	1.2999	0	1.4653	1.9212	-0.88852	1.4653	1.9212	0.88852	-1.2791	-2.0148	0	0.29232	-2.1018	-0.90505	0.29232	-2.1018	0.90505
7	-180	-180	-180	1.8	145.558	43.8383	43.7733	98.4886	0	0	0	1.2095	0	0	1.7532	1.3901	0	-1.4845	-1.018	0	2.841	1.327	0	1.3998	1.9155	-0.88919	1.3998	1.9155	0.88919	-2.1676	-0.1829	0	-1.5012	-1.6168	-0.90752	-1.5012	-1.6168	0.90752
8	-180	-180	-180	1.8	214.442	35.8509	35.7823	101.547	0	0	0	1.2066	0	0	1.9578	1.3115	0	-1.4845	1.018	0	3.0251	1.0974	0	1.694	1.8856	-0.89164	1.694	1.8856	0.89164	-1.3994	2.1057	0	-1.9282	0.61345	-0.90254	-1.9282	0.61345	0.90254
9	-180	-180	-180	1.8	263.149	42.9455	42.9172	104.352	0	0	0	1.2326	0	0	2.3088	0.98067	0	-0.21471	1.7871	0	3.233	0.40498	0	2.2933	1.6108	-0.89437	2.2933	1.6108	0.89437	0.716	2.3164	0	-0.80547	2.019	-0.88669	-0.80547	2.019	0.88669
10	-180	-180	-180	1.1	180	111.996	112.075	144.944	0	0	0	1.2249	0	0	1.8367	1.3807	0	-1.1	0	0	2.9197	1.2652	0	1.5256	1.9354	-0.89071	1.5256	1.9354	0.89071	-1.7537	0.9752	0	-1.5811	-0.60126	-0.8365	-1.5811	-0.60126	0.8365
11	-180	-180	-180	1.1	90	142.047	142.165	213.065	0	0	0	1.3492	0	0	1.9424	1.3508	0	0	-1.1	0	3.0276	1.2489	0	1.6324	1.916	-0.88571	1.6324	1.916	0.88571	-1.0631	-1.5297	0	0.38133	-1.6873	-0.86331	0.38133	-1.6873	0.86331
12	-180	-180	-180	1.1	270	173.218	173.328	223.297	0	0	0	1.4142	0	0	2.3785	1.0639	0	0	1.1	0	3.3399	0.55247	0	2.3219	1.7171	-0.88536	2.3219	1.7171	0.88536	0.71272	1.9269	0	-0.76265	1.5068	-0.78629	-0.76265	1.5068	0.78629
13	-180	-180	-180	1.1	116.36	89.8864	90.0133	153.205	0	0	0	1.2634	0	0	1.8356	1.3479	0	-0.48842	-0.98562	0	2.9221	1.2648	0	1.5141	1.9053	-0.88603	1.5141	1.9053	0.88603	-1.5999	-0.99791	0	-0.23119	-1.6684	-0.85111	-0.23119	-1.6684	0.85111
14	-180	-180	-180	1.1	243.64	99.316	99.443	176.286	0	0	0	1.283	0	0	2.063	1.2557	0	-0.48842	0.98562	0	3.1011	0.93019	0	1.8977	1.8794	-0.8872	1.8977	1.8794	0.8872	0.057486	1.948	0	-1.2444	1.1058	-0.82507	-1.2444	1.1058	0.82507
15	-180	-180	-180	1.1	96.8508	119.909	120.074	192.751	0	0	0	1.3166	0	0	1.9021	1.3486	0	-0.13121	-1.0921	0	2.9879	1.2539	0	1.5891	1.9122	-0.8856	1.5891	1.9122	0.8856	-1.2107	-1.4216	0	0.23894	-1.6956	-0.85799	0.23894	-1.6956	0.85799
16	-180	-180	-180	1.1	145.558	97.0352	97.1327	139.715	0	0	0	1.2343	0	0	1.8067	1.3578	0	-0.90717	-0.62212	0	2.8931	1.2736	0	1.4785	1.9074	-0.88789	1.4785	1.9074	0.88789	-1.9289	-0.14715	0	-0.97535	-1.3816	-0.84516	-0.97535	-1.3816	0.84516
17	-180	-180	-180	1.1	214.442	96.0957	96.2073	149.867	0	0	0	1.2368	0	0	1.877	1.3722	0	-0.90717	0.62212	0	2.9526	1.211	0	1.6015	1.9503	-0.88782	1.6015	1.9503	0.88782	-0.85724	1.7794	0	-1.6143	0.39526	-0.83843	-1.6143	0.39526	0.83843
18	-180	-180	-180	1.1	263.149	145.246	145.41	206.971	0	0	0	1.3638	0	0	2.2855	1.1149	0	-0.13121	1.0921	0	3.2683	0.64672	0	2.2067	1.7618	-0.8864	2.2067	1.7618	0.8864	0.56248	1.9324	0	-0.88439	1.4286	-0.80071	-0.88439	1.4286	0.80071
19	-180	-180	-180	2.5	180	58.3103	82.3183	103.759	0	0	0	1.1713	0	0	1.993	1.2822	0	-2.5	0	0	3.0441	1.0066	0	1.7429	1.854	-0.89378	1.7429	1.854	0.89378	-3.2761	0.75705	0	-2.2409	-0.48324	-0.92912	-2.2409	-0.48324	0.92912
20	-180	-180	-180	2.5	90	51.4978	58.9095	110.644	0	0	0	1.1809	0	0	1.9021	1.3365	0	0	-2.5	0	2.9707	1.137	0	1.6171	1.8946	-0.89253	1.6171	1.8946	0.89253	-0.98611	-2.9469	0	0.551	-2.4542	-0.92751	0.551	-2.4542	0.92751
21	-180	-180	-180	2.5	270	61.2311	68.8416	105.596	0	0	0	1.1738	0	0	2.2657	0.96156	0	0	2.5	0	3.201	0.40333	0	2.1932	1.581	-0.89427	2.1932	1.581	0.89427	0.86825	3.147	0	-0.58118	2.4866	-0.91467	-0.58118	2.4866	0.91467
22	-180	-180	-180	2.5	116.36	49.1973	56.0923	108.113	0	0	0	1.1764	0	0	1.9113	1.3263	0	-1.11	-2.24	0	2.9778	1.1168	0	1.6295	1.8855	-0.89269	1.6295	1.8855	0.89269	-2.0999	-1.8073	0	-0.69341	-2.5989	-0.93085	-0.69341	-2.5989	0.93085
23	-180	-180	-180	2.5	243.64	46.5411	50.2273	106.864	0	0	0	1.1744	0	0	2.0225	1.2282	0	-1.11	2.24	0	3.0685	0.93077	0	1.7832	1.8079	-0.89223	1.7832	1.8079	0.89223	-0.39923	3.0573	0	-1.6327	2.0294	-0.92334	-1.6327	2.0294	0.92334
24	-180	-180	-180	2.5	96.8508	49.8345	56.6016	109.373	0	0	0	1.18	0	0	1.9026	1.3347	0	-0.29821	-2.4822	0	2.971	1.1342	0	1.6178	1.8928	-0.89252	1.6178	1.8928	0.89252	-1.3615	-2.6809	0	0.24826	-2.5585	-0.92893	0.24826	-2.5585	0.92893
25	-180	-180	-180	2.5	145.558	54.5951	68.762	106.893	0	0	0	1.1722	0	0	1.9423	1.3087	0	-2.0618	-1.4139	0	3.0031	1.073	0	1.6716	1.872	-0.89334	1.6716	1.872	0.89334	-2.5263	-0.44073	0	-1.9279	-1.9423	-0.9335	-1.9279	-1.9423	0.9335
26	-180	-180	-180	2.5	214.442	51.2955	60.0104	107.352	0	0	0	1.1733	0	0	1.9887	1.2772	0	-2.0618	1.4139	0	3.0419	1.0087	0	1.735	1.8492	-0.89301	1.735	1.8492	0.89301	-1.9635	2.4924	0	-2.2931	0.91089	-0.92754	-2.2931	0.91089	0.92754
27	-180	-180	-180	2.5	263.149	54.3037	59.2901	106.186	0	0	0	1.1741	0	0	2.185	1.0571	0	-0.29821	2.4822	0	3.1679	0.58951	0	2.0499	1.6671	-0.89358	2.0499	1.6671	0.89358	0.5612	3.1399	0	-0.87546	2.4479	-0.91621	-0.87546	2.4479	0.91621
28	-180	-180	-180	1.30503	180	52.1523	52.1842	87.501	0	0	0	1.2211	0	0	1.8484	1.3897	0	-1.305	0	0	2.9319	1.2716	0	1.5317	1.9385	-0.89161	1.5317	1.9385	0.89161	-1.8502	0.98179	0	-1.6941	-0.56509	-0.86714	-1.6941	-0.56508	0.86714
29	-180	-180	-180	1.30503	90	44.827	44.9078	119.263	0	0	0	1.292	0	0	1.8809	1.3591	0	0	-1.305	0	2.9666	1.2677	0	1.5612	1.9152	-0.88666	1.5612	1.9152	0.88666	-1.0426	-1.7042	0	0.43885	-1.7822	-0.87981	0.43885	-1.7822	0.87981
30	-180	-180	-180	1.30503	270	85.4975	85.5889	134.289	0	0	0	1.3376	0	0	2.4032	0.97498	0	0	1.305	0	3.3233	0.39269	0	2.3968	1.6243	-0.88699	2.3968	1.6243	0.88699	0.81954	2.0019	0	-0.65104	1.6806	-0.83189	-0.65104	1.6806	0.83189
31	-180	-180	-180	1.30503	116.36	11.2012	11.271	80.3807	0	0	0	1.241	0	0	1.8051	1.3575	0	-0.57945	-1.1693	0	2.892	1.2842	0	1.4727	1.9049	-0.88665	1.4727	1.9049	0.88665	-1.6699	-1.0821	0	-0.30282	-1.7814	-0.87365	-0.30282	-1.7814	0.87365
32	-180	-180	-180	1.30503	243.64	21.2153	21.2774	99.9412	0	0	0	1.2559	0	0	2.0691	1.2404	0	-0.57945	1.1693	0	3.1037	0.90405	0	1.9063	1.8591	-0.88928	1.9063	1.8591	0.88928	0.032225	2.0741	0	-1.2689	1.2443	-0.85741	-1.2689	1.2443	0.85741
33	-180	-180	-180	1.30503	96.8508	28.1578	28.235	105.223	0	0	0	1.2733	0	0	1.8552	1.3559	0	-0.15567	-1.2957	0	2.9413	1.2695	0	1.5335	1.9109	-0.88651	1.5335	1.9109	0.88651	-1.2247	-1.5792	0	0.26259	-1.801	-0.87655	0.26259	-1.801	0.87655
34	-180	-180	-180	1.30503	145.558	30.9052	30.9451	77.0008	0	0	0	1.2256	0	0	1.7846	1.3708	0	-1.0763	-0.73808	0	2.8724	1.3009	0	1.4413	1.9083	-0.88806	1.4413	1.9083	0.88806	-1.9989	-0.14425	0	-1.1288	-1.4241	-0.87036	-1.1288	-1.4241	0.87036
35	-180	-180	-180	1.30503	214.442	28.5505	28.5936	87.3753	0	0	0	1.2267	0	0	1.8987	1.3646	0	-1.0763	0.73808	0	2.9737	1.1958	0	1.6241	1.9389	-0.89009	1.6241	1.9389	0.89009	-0.99385	1.8548	0	-1.6927	0.46153	-0.86639	-1.6927	0.46153	0.86639
36	-180	-180	-180	1.30503	263.149	59.2199	59.3242	121.318	0	0	0	1.3076	0	0	2.3066	1.0598	0	-0.15567	1.2957	0	3.2621	0.5379	0	2.2639	1.7032	-0.88853	2.2639	1.7032	0.88853	0.6349	2.025	0	-0.82035	1.5995	-0.84017	-0.82035	1.5995	0.84017
37	-180	-180	-180	2.29497	180	64.0526	83.7345	110.078	0	0	0	1.1734	0	0	2.0012	1.2794	0	-2.295	0	0	3.0511	0.99938	0	1.7541	1.8526	-0.89381	1.7541	1.8526	0.89381	-3.0111	0.81665	0	-2.1368	-0.53347	-0.92547	-2.1368	-0.53347	0.92547
38	-180	-180	-180	2.29497	90	49.1976	50.6222	113.74	0	0	0	1.1936	0	0	1.8472	1.3659	0	0	-2.295	0	2.9246	1.2173	0	1.5403	1.9151	-0.89142	1.5403	1.9151	0.89142	-0.99103	-2.735	0	0.56205	-2.3304	-0.92207	0.56205	-2.3304	0.92207
39	-180	-180	-180	2.29497	270	64.5159	66.8412	110.61	0	0	0	1.1798	0	0	2.3271	0.87714	0	0	2.295	0	3.2171	0.24982	0	2.3111	1.4995	-0.89583	2.3111	1.4995	0.89583	0.95147	2.8045	0	-0.5817	2.4413	-0.90537	-0.5817	2.4413	0.90537
40	-180	-180	-180	2.29497	116.36	45.7059	47.0316	109.649	0	0	0	1.1841	0	0	1.8556	1.3522	0	-1.019	-2.0563	0	2.9308	1.1903	0	1.5519	1.9021	-0.89166	1.5519	1.9021	0.89166	-2.0304	-1.674	0	-0.63571	-2.4677	-0.92487	-0.63571	-2.4677	0.92487
41	-180	-180	-180	2.29497	243.64	42.296	42.4681	107.669	0	0	0	1.1805	0	0	2.0356	1.2079	0	-1.019	2.0563	0	3.0795	0.90235	0	1.8047	1.7921	-0.89226	1.8047	1.7921	0.89226	-0.31334	2.879	0	-1.58	1.9132	-0.91546	-1.58	1.9132	0.91546
42	-180	-180	-180	2.29497	96.8508	46.3484	47.4546	111.352	0	0	0	1.1912	0	0	1.8477	1.3624	0	-0.27376	-2.2786	0	2.9246	1.2115	0	1.5412	1.9116	-0.89143	1.5412	1.9116	0.89143	-1.3342	-2.4986	0	0.26995	-2.4279	-0.92278	0.26995	-2.4279	0.92278
43	-180	-180	-180	2.29497	145.558	56.2653	63.5171	111.653	0	0	0	1.1766	0	0	1.8984	1.3305	0	-1.8927	-1.298	0	2.9671	1.1324	0	1.6092	1.886	-0.89261	1.6092	1.886	0.89261	-2.4044	-0.34854	0	-1.8272	-1.85	-0.92855	-1.8272	-1.85	0.92855
44	-180	-180	-180	2.29497	214.442	50.846	53.9963	110.915	0	0	0	1.178	0	0	1.9907	1.2743	0	-1.8927	1.298	0	3.045	1.0092	0	1.7374	1.8478	-0.89265	1.7374	1.8478	0.89265	-1.8164	2.3798	0	-2.1875	0.8158	-0.92168	-2.1875	0.8158	0.92168
45	-180	-180	-180	2.29497	263.149	54.1891	54.9756	109.093	0	0	0	1.1807	0	0	2.2349	0.99545	0	-0.27376	2.2786	0	3.19	0.47368	0	2.143	1.6122	-0.89513	2.143	1.6122	0.89513	0.64097	2.853	0	-0.86208	2.3713	-0.90739	-0.86208	2.3713	0.90739
46	-180	-180	-180	1.15328	180	86.127	86.1913	119.86	0	0	0	1.2229	0	0	1.8404	1.3835	0	-1.1533	0	0	2.9235	1.2664	0	1.5278	1.9364	-0.89105	1.5278	1.9364	0.89105	-1.7766	0.97511	0	-1.6075	-0.5872	-0.84677	-1.6075	-0.5872	0.84677
47	-180	-180	-180	1.15328	90	105.053	105.159	177.226	0	0	0	1.3282	0	0	1.9224	1.3527	0	0	-1.1533	0	3.0076	1.2528	0	1.6096	1.9152	-0.88599	1.6096	1.9152	0.88599	-1.0562	-1.5727	0	0.39515	-1.7099	-0.86879	0.39515	-1.7099	0.86879
48	-180	-180	-180	1.15328	270	139.87	139.972	189.235	0	0	0	1.3867	0	0	2.3866	1.033	0	0	1.1533	0	3.335	0.49834	0	2.345	1.686	-0.8854	2.345	1.686	0.8854	0.74464	1.9455	0	-0.7222	1.5515	-0.80244	-0.7222	1.5515	0.80244
49	-180	-180	-180	1.15328	116.36	57.8965	57.9946	123.315	0	0	0	1.2556	0	0	1.8262	1.3502	0	-0.51208	-1.0334	0	2.9128	1.2699	0	1.5014	1.9046	-0.8862	1.5014	1.9046	0.8862	-1.617	-1.018	0	-0.25017	-1.6946	-0.85809	-0.25017	-1.6946	0.85809
50	-180	-180	-180	1.15328	243.64	67.7774	67.8761	145.533	0	0	0	1.2739	0	0	2.0656	1.2511	0	-0.51208	1.0334	0	3.1021	0.92057	0	1.9023	1.8736	-0.88777	1.9023	1.8736	0.88777	0.053521	1.9787	0	-1.2462	1.1418	-0.83535	-1.2462	1.1418	0.83535
51	-180	-180	-180	1.53212	180	53.8066	53.7779	90.0085	0	0	0	1.2234	0	0	1.8585	1.3954	0	-1.5321	0	0	2.9429	1.2771	0	1.5386	1.9415	-0.89192	1.5386	1.9415	0.89192	-1.9794	1.0019	0	-1.8317	-0.55439	-0.88948	-1.8317	-0.55439	0.88949
52	-180	-180	-180	1.53212	90	20.0453	20.0618	95.4045	0	0	0	1.2632	0	0	1.8373	1.3704	0	0	-1.5321	0	2.9238	1.2916	0	1.5097	1.9193	-0.88751	1.5097	1.9193	0.88751	-1.032	-1.9149	0	0.49505	-1.8999	-0.89282	0.49505	-1.8999	0.89282
53	-180	-180	-180	1.53212	270	61.7927	61.8182	110.839	0	0	0	1.2936	0	0	2.4142	0.92341	0	0	1.5321	0	3.3039	0.2954	0	2.4448	1.5647	-0.89035	2.4448	1.5647	0.89035	0.90522	2.0966	0	-0.59716	1.8749	-0.85957	-0.59716	1.8749	0.85957
54	-180	-180	-180	1.53212	116.36	1.51018	1.51385	73.0192	0	0	0	1.2283	0	0	1.7833	1.3688	0	-0.68029	-1.3728	0	2.8704	1.3017	0	1.4443	1.9093	-0.88741	1.4443	1.9093	0.88741	-1.7525	-1.1939	0	-0.38053	-1.9288	-0.89109	-0.38053	-1.9288	0.89109
55	-180	-180	-180	1.53212	243.64	9.23211	9.2288	87.751	0	0	0	1.2371	0	0	2.0658	1.2263	0	-0.68029	1.3728	0	3.102	0.89434	0	1.8935	1.8377	-0.89105	1.8935	1.8377	0.89105	-0.02024	2.2349	0	-1.3276	1.3968	-0.87961	-1.3276	1.3968	0.87961
56	-180	-180	-180	2.06788	180	74.1198	85.8351	120.006	0	0	0	1.18	0	0	2.011	1.2833	0	-2.0679	0	0	3.0611	1.0024	0	1.766	1.858	-0.89381	1.766	1.858	0.89381	-2.7829	0.82364	0	-1.9946	-0.56543	-0.91847	-1.9946	-0.56543	0.91847
57	-180	-180	-180	2.06788	90	39.9624	39.8702	109.832	0	0	0	1.2146	0	0	1.8014	1.3865	0	0	-2.0679	0	2.8855	1.2897	0	1.4747	1.9283	-0.88991	1.4747	1.9283	0.88991	-1.0029	-2.487	0	0.56255	-2.1949	-0.91445	0.56255	-2.1949	0.91445
58	-180	-180	-180	2.06788	270	64.8678	64.8096	113.36	0	0	0	1.2004	0	0	2.3895	0.81771	0	0	2.0679	0	3.2363	0.13275	0	2.4368	1.4402	-0.89681	2.4368	1.4402	0.89681	1.0078	2.4307	0	-0.54826	2.3583	-0.89452	-0.54826	2.3583	0.89452
59	-180	-180	-180	2.06788	116.36	34.8995	34.7989	103.709	0	0	0	1.1975	0	0	1.7949	1.3756	0	-0.91817	-1.8529	0	2.8778	1.2693	0	1.4672	1.915	-0.89016	1.4672	1.915	0.89016	-1.9482	-1.5202	0	-0.56537	-2.311	-0.91692	-0.56537	-2.311	0.91692
60	-180	-180	-180	2.06788	243.64	32.9413	32.8599	104.126	0	0	0	1.1933	0	0	2.0458	1.2014	0	-0.91817	1.8529	0	3.0877	0.88817	0	1.8313	1.7928	-0.89245	1.8313	1.7928	0.89245	-0.21624	2.679	0	-1.505	1.7616	-0.90767	-1.505	1.7616	0.90767
61	-180	-180	-180	2.44672	180	59.5379	82.6375	105.125	0	0	0	1.1717	0	0	1.9949	1.2815	0	-2.4467	0	0	3.0456	1.0048	0	1.7454	1.8536	-0.89379	1.7454	1.8536	0.89379	-3.196	0.78412	0	-2.2183	-0.50023	-0.92846	-2.2183	-0.50025	0.92846
62	-180	-180	-180	2.44672	90	51.2095	56.8972	111.717	0	0	0	1.1834	0	0	1.8897	1.3434	0	0	-2.4467	0	2.9604	1.1552	0	1.5998	1.8995	-0.89229	1.5998	1.8995	0.89229	-0.98728	-2.8919	0	0.55417	-2.422	-0.9266	0.55417	-2.422	0.9266
63	-180	-180	-180	2.44672	270	62.1306	68.3305	106.91	0	0	0	1.1748	0	0	2.28	0.94119	0	0	2.4467	0	3.2053	0.36687	0	2.2197	1.5617	-0.89459	2.2197	1.5617	0.89459	0.88782	3.0658	0	-0.58529	2.4714	-0.91247	-0.58529	2.4714	0.91247
64	-180	-180	-180	2.44672	116.36	48.6229	53.9093	108.807	0	0	0	1.178	0	0	1.8993	1.3321	0	-1.0864	-2.1923	0	2.9678	1.1328	0	1.6129	1.8894	-0.89247	1.6129	1.8894	0.89247	-2.0822	-1.773	0	-0.67814	-2.5648	-0.92955	-0.67814	-2.5648	0.92955
65	-180	-180	-180	2.44672	243.64	45.763	48.2927	107.331	0	0	0	1.1755	0	0	2.0262	1.2227	0	-1.0864	2.1923	0	3.0715	0.92267	0	1.7891	1.8035	-0.89223	1.7891	1.8035	0.89223	-0.37608	3.0103	0	-1.6196	1.9993	-0.92155	-1.6196	1.9993	0.92155
66	-180	-180	-60	1.8	180	77.2802	77.1891	114.634	0	0	0	1.2241	0	0	1.8988	1.3921	0	-1.8	0	0	1.5926	1.9431	-0.89357	1.5894	1.9451	0.89124	2.9806	1.2484	0.0020113	-2.2124	1.0063	0	-1.9622	-0.56229	-0.90949	-1.9622	-0.56234	0.90945
67	-180	-180	-60	1.8	90	26.1776	26.1292	100.015	0	0	0	1.2387	0	0	1.8043	1.3828	0	0	-1.8	0	1.4725	1.9262	-0.88832	1.4732	1.9259	0.88878	2.8908	1.307	-0.00040385	-1.021	-2.1859	0	0.54011	-2.0443	-0.90535	0.54011	-2.0443	0.90535
68	-180	-180	-60	1.8	270	61.8809	61.8479	111.711	0	0	0	1.2445	0	0	2.4111	0.86237	0	0	1.8	0	2.4569	1.5228	-0.87277	2.4739	1.4659	0.91225	3.2714	0.19496	-0.027819	0.97575	2.2283	0	-0.56384	2.1176	-0.87969	-0.56129	2.1118	0.88333
69	-180	-180	-60	1.8	116.36	17.1828	17.1203	88.8756	0	0	0	1.2138	0	0	1.7748	1.3778	0	-0.79923	-1.6128	0	1.4384	1.9141	-0.88986	1.4347	1.916	0.88732	2.8609	1.3025	0.002224	-1.85	-1.3464	0	-0.47201	-2.1155	-0.90638	-0.472	-2.1154	0.90642
70	-180	-180	-60	1.8	243.64	19.9526	19.9048	96.4187	0	0	0	1.2145	0	0	2.0562	1.2099	0	-0.79923	1.6128	0	1.8566	1.8185	-0.88564	1.8718	1.8046	0.8984	3.0955	0.88788	-0.010777	-0.10773	2.4476	0	-1.4133	1.5772	-0.89646	-1.4126	1.5768	0.89695
71	-180	-180	-60	1.8	96.8508	19.214	19.1587	94.3426	0	0	0	1.2292	0	0	1.7968	1.3785	0	-0.21471	-1.7871	0	1.4654	1.9212	-0.8886	1.4652	1.9213	0.88844	2.8829	1.2999	0.00014484	-1.2791	-2.0148	0	0.29232	-2.1018	-0.90505	0.29232	-2.1018	0.90505
72	-180	-180	-60	1.8	145.558	43.8382	43.7731	98.4885	0	0	0	1.2095	0	0	1.7532	1.3901	0	-1.4845	-1.018	0	1.4046	1.9132	-0.89246	1.3948	1.9179	0.88574	2.841	1.327	0.0058039	-2.1676	-0.1829	0	-1.5013	-1.6169	-0.90741	-1.5011	-1.6166	0.90762
73	-180	-180	-60	1.8	214.442	35.8509	35.7823	101.547	0	0	0	1.2066	0	0	1.9578	1.3115	0	-1.4845	1.018	0	1.6937	1.8858	-0.89141	1.6944	1.8854	0.89188	3.0251	1.0974	-0.00041186	-1.3994	2.1057	0	-1.9282	0.61345	-0.90254	-1.9282	0.61345	0.90255
74	-180	-180	-60	1.8	263.149	42.9575	42.9302	104.341	0	0	0	1.2326	0	0	2.3094	0.97975	0	-0.21471	1.7871	0	2.2803	1.6361	-0.87475	2.3048	1.5862	0.91098	3.2335	0.40476	-0.026985	0.71586	2.3166	0	-0.80661	2.0209	-0.88544	-0.80438	2.017	0.88791
75	-180	-180	-60	1.1	180	111.996	112.075	144.944	0	0	0	1.2249	0	0	1.8367	1.3807	0	-1.1	0	0	1.5223	1.9373	-0.88836	1.5291	1.9335	0.8931	2.9197	1.2651	-0.0041299	-1.7537	0.9752	0	-1.581	-0.60119	-0.83656	-1.5812	-0.60133	0.83644
76	-180	-180	-60	1.1	90	142.047	142.165	213.065	0	0	0	1.3492	0	0	1.9424	1.3508	0	0	-1.1	0	1.6322	1.9161	-0.88558	1.6325	1.9159	0.88584	3.0276	1.2489	-0.00021925	-1.0631	-1.5297	0	0.38133	-1.6873	-0.86331	0.38134	-1.6873	0.86331
77	-180	-180	-60	1.1	270	173.225	173.335	223.303	0	0	0	1.4141	0	0	2.379	1.0632	0	0	1.1	0	2.3107	1.7355	-0.87016	2.3316	1.6993	0.89841	3.3404	0.55237	-0.01987	0.71273	1.9269	0	-0.76501	1.5077	-0.78385	-0.7601	1.506	0.78881
78	-180	-180	-60	1.1	116.36	89.8864	90.0133	153.205	0	0	0	1.2634	0	0	1.8356	1.3479	0	-0.48842	-0.98562	0	1.5155	1.9045	-0.88701	1.5126	1.906	0.88501	2.9221	1.2649	0.001738	-1.5999	-0.99791	0	-0.23116	-1.6684	-0.85107	-0.23123	-1.6684	0.85115
79	-180	-180	-60	1.1	243.64	99.3257	99.4534	176.273	0	0	0	1.283	0	0	2.0635	1.2552	0	-0.48842	0.98562	0	1.876	1.9011	-0.86646	1.9178	1.8578	0.90531	3.1013	0.93054	-0.030615	0.057317	1.948	0	-1.2466	1.1056	-0.82313	-1.2423	1.106	0.82701
80	-180	-180	-60	1.1	96.8508	119.909	120.074	192.751	0	0	0	1.3166	0	0	1.9021	1.3486	0	-0.13121	-1.0921	0	1.5893	1.9121	-0.88571	1.589	1.9123	0.8855	2.9879	1.2539	0.00017202	-1.2107	-1.4216	0	0.23894	-1.6956	-0.85798	0.23894	-1.6955	0.85799
81	-180	-180	-60	1.1	145.558	97.0352	97.1327	139.715	0	0	0	1.2343	0	0	1.8067	1.3578	0	-0.90717	-0.62212	0	1.4806	1.9063	-0.88936	1.4763	1.9085	0.88636	2.8931	1.2737	0.0025797	-1.9289	-0.14715	0	-0.97536	-1.3818	-0.84507	-0.97535	-1.3815	0.84524
82	-180	-180	-60	1.1	214.442	96.0955	96.207	149.867	0	0	0	1.2368	0	0	1.8771	1.3722	0	-0.90717	0.62212	0	1.59	1.9577	-0.87928	1.6134	1.9429	0.89621	2.9526	1.211	-0.014922	-0.85724	1.7794	0	-1.6147	0.39488	-0.83792	-1.6138	0.39563	0.83895
83	-180	-180	-60	1.1	263.149	145.257	145.42	207.005	0	0	0	1.3637	0	0	2.2861	1.1142	0	-0.13121	1.0921	0	2.1915	1.7848	-0.86698	2.2202	1.7393	0.90299	3.2688	0.64673	-0.025812	0.56244	1.9324	0	-0.8872	1.4294	-0.79788	-0.88147	1.4279	0.80359
84	-180	-180	-60	2.5	180	58.3103	82.3182	103.759	0	0	0	1.1713	0	0	1.993	1.2822	0	-2.5	0	0	1.7447	1.8526	-0.89518	1.741	1.8555	0.89233	3.0441	1.0066	0.0025291	-3.2761	0.75704	0	-2.2409	-0.48322	-0.92912	-2.2409	-0.48326	0.92911
85	-180	-180	-60	2.5	90	51.4978	58.9096	110.644	0	0	0	1.1809	0	0	1.9021	1.3365	0	0	-2.5	0	1.6175	1.8943	-0.89277	1.6168	1.8948	0.89228	2.9707	1.137	0.00043506	-0.98611	-2.9469	0	0.55101	-2.4542	-0.92751	0.551	-2.4542	0.92751
86	-180	-180	-60	2.5	270	61.2311	68.8414	105.596	0	0	0	1.1738	0	0	2.2657	0.96154	0	0	2.5	0	2.1916	1.5831	-0.89272	2.1946	1.5791	0.89572	3.201	0.40336	-0.0025528	0.8682	3.1471	0	-0.5816	2.4871	-0.91441	-0.58076	2.486	0.91493
87	-180	-180	-60	2.5	116.36	49.1973	56.0921	108.113	0	0	0	1.1764	0	0	1.9113	1.3263	0	-1.11	-2.24	0	1.6308	1.8846	-0.89362	1.6282	1.8864	0.89173	2.9778	1.1168	0.0016714	-2.0999	-1.8073	0	-0.69342	-2.599	-0.93084	-0.6934	-2.5989	0.93085
88	-180	-180	-60	2.5	243.64	46.5409	50.2268	106.887	0	0	0	1.1743	0	0	2.0225	1.2282	0	-1.11	2.24	0	1.7898	1.8028	-0.89728	1.7764	1.813	0.88701	3.0685	0.93083	0.0090007	-0.39928	3.0573	0	-1.6321	2.0289	-0.92355	-1.6332	2.0298	0.92312
89	-180	-180	-60	2.5	96.8508	49.8345	56.6016	109.373	0	0	0	1.18	0	0	1.9026	1.3347	0	-0.29821	-2.4822	0	1.6183	1.8924	-0.89294	1.6172	1.8932	0.8921	2.971	1.1342	0.00074805	-1.3615	-2.6809	0	0.24827	-2.5585	-0.92892	0.24826	-2.5585	0.92893
90	-180	-180	-60	2.5	145.558	54.5951	68.7622	106.893	0	0	0	1.1722	0	0	1.9423	1.3087	0	-2.0618	-1.4139	0	1.6735	1.8706	-0.89476	1.6696	1.8733	0.89187	3.0031	1.0731	0.0025662	-2.5263	-0.44073	0	-1.928	-1.9423	-0.93348	-1.9278	-1.9422	0.93351
91	-180	-180	-60	2.5	214.442	51.2954	60.0102	107.352	0	0	0	1.1733	0	0	1.9887	1.2772	0	-2.0618	1.4139	0	1.7386	1.8465	-0.89576	1.7312	1.8519	0.89017	3.0419	1.0088	0.0049464	-1.9635	2.4924	0	-2.2929	0.91088	-0.92757	-2.2932	0.91089	0.92751
92	-180	-180	-60	2.5	263.149	54.3037	59.2901	106.186	0	0	0	1.1741	0	0	2.185	1.0571	0	-0.29821	2.4822	0	2.0516	1.6653	-0.89508	2.0483	1.6688	0.89214	3.1679	0.58948	0.0025351	0.56126	3.1398	0	-0.87516	2.4475	-0.91639	-0.87579	2.4483	0.91603
93	-180	-180	-60	1.30503	180	52.1523	52.1842	87.501	0	0	0	1.2211	0	0	1.8484	1.3897	0	-1.305	0	0	1.5315	1.9387	-0.89147	1.5319	1.9384	0.89175	2.9319	1.2716	-0.00023995	-1.8502	0.98179	0	-1.6941	-0.56508	-0.86714	-1.6941	-0.56509	0.86714
94	-180	-180	-60	1.30503	90	44.8269	44.9078	119.263	0	0	0	1.292	0	0	1.8809	1.3591	0	0	-1.305	0	1.5628	1.9143	-0.88781	1.5594	1.9161	0.88546	2.9665	1.2678	0.0020261	-1.0426	-1.7042	0	0.43886	-1.7822	-0.8798	0.43884	-1.7822	0.87982
95	-180	-180	-60	1.30503	270	85.5018	85.5937	134.293	0	0	0	1.3376	0	0	2.4037	0.97433	0	0	1.305	0	2.3893	1.6434	-0.87219	2.4042	1.6052	0.90023	3.3236	0.39217	-0.018704	0.81969	2.0017	0	-0.65261	1.6819	-0.83008	-0.64908	1.6795	0.83382
96	-180	-180	-60	1.30503	116.36	11.2011	11.2709	80.3806	0	0	0	1.241	0	0	1.8051	1.3575	0	-0.57945	-1.1693	0	1.476	1.9032	-0.88899	1.4691	1.9067	0.88419	2.892	1.2843	0.0041523	-1.6699	-1.0821	0	-0.3028	-1.7814	-0.8736	-0.30285	-1.7813	0.8737
97	-180	-180	-60	1.30503	243.64	21.2218	21.2841	99.9246	0	0	0	1.2559	0	0	2.0695	1.2401	0	-0.57945	1.1693	0	1.8873	1.8789	-0.8709	1.9243	1.8394	0.90565	3.1039	0.90426	-0.02757	0.032085	2.0742	0	-1.2701	1.2444	-0.8564	-1.2676	1.2442	0.8584
98	-180	-180	-60	1.30503	96.8508	28.1578	28.235	105.223	0	0	0	1.2733	0	0	1.8552	1.3559	0	-0.15567	-1.2957	0	1.5353	1.91	-0.88774	1.5316	1.9119	0.88521	2.9413	1.2696	0.0021863	-1.2247	-1.5792	0	0.2626	-1.801	-0.87653	0.26257	-1.801	0.87656
99	-180	-180	-60	1.30503	145.558	30.905	30.9449	77.0006	0	0	0	1.2256	0	0	1.7846	1.3708	0	-1.0763	-0.73808	0	1.4466	1.9055	-0.89181	1.4356	1.9111	0.8841	2.8724	1.301	0.0065376	-1.9989	-0.14424	0	-1.1289	-1.4244	-0.87017	-1.1288	-1.4238	0.87055
100	-180	-180	-60	1.30503	214.442	28.5502	28.5934	87.3751	0	0	0	1.2267	0	0	1.8987	1.3646	0	-1.0763	0.73808	0	1.6156	1.9446	-0.8837	1.6331	1.9332	0.89647	2.9737	1.1957	-0.011258	-0.99385	1.8548	0	-1.6929	0.4614	-0.86619	-1.6924	0.46167	0.8666
101	-180	-180	-60	1.30503	263.149	59.23	59.3342	121.328	0	0	0	1.3076	0	0	2.3072	1.059	0	-0.15567	1.2957	0	2.2507	1.7291	-0.86786	2.2761	1.6778	0.90643	3.2625	0.53773	-0.026824	0.63489	2.025	0	-0.82225	1.6006	-0.83827	-0.81841	1.5984	0.84208
102	-180	-180	-60	2.29497	180	64.0525	83.7341	110.078	0	0	0	1.1734	0	0	2.0012	1.2794	0	-2.295	0	0	1.7558	1.8514	-0.89509	1.7524	1.8539	0.89249	3.0511	0.9994	0.0023084	-3.0111	0.81665	0	-2.1367	-0.53346	-0.92548	-2.1368	-0.53349	0.92546
103	-180	-180	-60	2.29497	90	49.1976	50.6223	113.74	0	0	0	1.1936	0	0	1.8472	1.3659	0	0	-2.295	0	1.5398	1.9154	-0.89104	1.5409	1.9147	0.89182	2.9246	1.2173	-0.00068801	-0.99103	-2.735	0	0.56204	-2.3304	-0.92207	0.56205	-2.3304	0.92206
104	-180	-180	-60	2.29497	270	64.5169	66.8345	110.588	0	0	0	1.1798	0	0	2.3276	0.87636	0	0	2.295	0	2.307	1.507	-0.88982	2.3162	1.4912	0.90116	3.2174	0.24875	-0.0093782	0.95202	2.8034	0	-0.58241	2.4441	-0.90447	-0.5803	2.4402	0.90645
105	-180	-180	-60	2.29497	116.36	45.7059	47.0317	109.626	0	0	0	1.1841	0	0	1.8556	1.3522	0	-1.019	-2.0563	0	1.553	1.9014	-0.89245	1.5508	1.9028	0.89084	2.9308	1.1903	0.0014288	-2.0304	-1.674	0	-0.63572	-2.4677	-0.92486	-0.63571	-2.4676	0.92487
106	-180	-180	-60	2.29497	243.64	42.2959	42.4679	107.669	0	0	0	1.1805	0	0	2.0356	1.2079	0	-1.019	2.0563	0	1.811	1.7871	-0.89714	1.7983	1.7971	0.88725	3.0795	0.90237	0.0086548	-0.31337	2.879	0	-1.5795	1.9128	-0.9157	-1.5805	1.9136	0.91522
107	-180	-180	-60	2.29497	96.8508	46.3484	47.4546	111.352	0	0	0	1.1912	0	0	1.8477	1.3624	0	-0.27376	-2.2786	0	1.5411	1.9117	-0.89136	1.5413	1.9115	0.89151	2.9246	1.2115	-0.00012933	-1.3342	-2.4986	0	0.26994	-2.4279	-0.92278	0.26995	-2.4279	0.92278
108	-180	-180	-60	2.29497	145.558	56.2652	63.5169	111.653	0	0	0	1.1766	0	0	1.8984	1.3305	0	-1.8927	-1.298	0	1.6115	1.8845	-0.89432	1.6067	1.8876	0.89084	2.9671	1.1324	0.0030749	-2.4044	-0.34854	0	-1.8273	-1.8501	-0.92851	-1.8271	-1.8499	0.92858
109	-180	-180	-60	2.29497	214.442	50.8459	53.9962	110.915	0	0	0	1.178	0	0	1.9907	1.2743	0	-1.8927	1.298	0	1.7413	1.8449	-0.89561	1.7333	1.8507	0.88959	3.045	1.0092	0.0053328	-1.8164	2.3798	0	-2.1873	0.81579	-0.92173	-2.1876	0.8158	0.92164
110	-180	-180	-60	2.29497	263.149	54.1892	54.9756	109.093	0	0	0	1.1807	0	0	2.2349	0.99543	0	-0.27376	2.2786	0	2.1405	1.6152	-0.89276	2.1451	1.6094	0.8973	3.1901	0.47375	-0.0038485	0.64092	2.8531	0	-0.86243	2.3718	-0.90711	-0.86174	2.3707	0.90766
111	-180	-180	-60	1.15328	180	86.1269	86.1913	119.86	0	0	0	1.2229	0	0	1.8404	1.3835	0	-1.1533	0	0	1.5255	1.9377	-0.88938	1.5303	1.935	0.89276	2.9235	1.2664	-0.0029276	-1.7766	0.97511	0	-1.6075	-0.58715	-0.84681	-1.6076	-0.58725	0.84672
112	-180	-180	-60	1.15328	90	105.053	105.159	177.226	0	0	0	1.3282	0	0	1.9224	1.3527	0	0	-1.1533	0	1.6103	1.9148	-0.88644	1.609	1.9155	0.88554	3.0076	1.2528	0.00077667	-1.0562	-1.5727	0	0.39516	-1.7099	-0.86878	0.39515	-1.7099	0.86879
113	-180	-180	-60	1.15328	270	139.874	139.977	189.263	0	0	0	1.3866	0	0	2.3869	1.0325	0	0	1.1533	0	2.3358	1.703	-0.87169	2.353	1.6694	0.8974	3.3354	0.4982	-0.017658	0.74468	1.9454	0	-0.72439	1.5525	-0.80011	-0.71985	1.5506	0.80482
114	-180	-180	-60	1.15328	116.36	57.8965	57.9946	123.315	0	0	0	1.2556	0	0	1.8262	1.3502	0	-0.51208	-1.0334	0	1.5035	1.9034	-0.88772	1.499	1.9057	0.8846	2.9128	1.2699	0.0027062	-1.617	-1.018	0	-0.25013	-1.6946	-0.85804	-0.25021	-1.6945	0.85813
115	-180	-180	-60	1.15328	243.64	67.7863	67.8855	145.519	0	0	0	1.274	0	0	2.0661	1.2506	0	-0.51208	1.0334	0	1.8814	1.8951	-0.86753	1.9219	1.8523	0.90554	3.1023	0.92085	-0.029932	0.05336	1.9787	0	-1.248	1.1417	-0.83373	-1.2444	1.1419	0.83696
116	-180	-180	-60	1.53212	180	53.8066	53.7779	90.0085	0	0	0	1.2234	0	0	1.8585	1.3954	0	-1.5321	0	0	1.5402	1.9406	-0.89303	1.537	1.9424	0.89078	2.9429	1.2771	0.00192	-1.9794	1.0019	0	-1.8317	-0.5544	-0.88948	-1.8317	-0.55438	0.88949
117	-180	-180	-60	1.53212	90	20.0453	20.0618	95.4045	0	0	0	1.2632	0	0	1.8373	1.3704	0	0	-1.5321	0	1.5109	1.9186	-0.88836	1.5084	1.9199	0.88663	2.9238	1.2916	0.0014943	-1.032	-1.9149	0	0.49506	-1.8999	-0.89281	0.49505	-1.8999	0.89282
118	-180	-180	-60	1.53212	270	61.8007	61.8272	110.87	0	0	0	1.2936	0	0	2.4142	0.92284	0	0	1.5321	0	2.4356	1.5914	-0.87043	2.4517	1.5391	0.90766	3.3043	0.29589	-0.02491	0.9049	2.0973	0	-0.5989	1.8766	-0.85778	-0.59607	1.8729	0.86115
119	-180	-180	-60	1.53212	116.36	1.51011	1.51378	73.0191	0	0	0	1.2283	0	0	1.7833	1.3688	0	-0.68029	-1.3728	0	1.4475	1.9076	-0.8896	1.441	1.9109	0.8851	2.8704	1.3017	0.0039093	-1.7525	-1.1939	0	-0.38052	-1.9289	-0.89105	-0.38053	-1.9288	0.89113
120	-180	-180	-60	1.53212	243.64	9.23548	9.23227	87.7544	0	0	0	1.2371	0	0	2.066	1.226	0	-0.68029	1.3728	0	1.8784	1.8527	-0.87714	1.9079	1.8229	0.90366	3.1021	0.89451	-0.021595	-0.020359	2.235	0	-1.3284	1.397	-0.87906	-1.3269	1.3965	0.88014
121	-180	-180	-60	2.06788	180	74.1198	85.8351	120.006	0	0	0	1.18	0	0	2.011	1.2833	0	-2.0679	0	0	1.7672	1.8571	-0.8947	1.7648	1.8589	0.8929	3.0611	1.0025	0.0016028	-2.7829	0.82364	0	-1.9946	-0.56541	-0.91848	-1.9946	-0.56544	0.91846
122	-180	-180	-60	2.06788	90	39.9624	39.8701	109.832	0	0	0	1.2146	0	0	1.8014	1.3865	0	0	-2.0679	0	1.4735	1.9289	-0.88912	1.4759	1.9277	0.89073	2.8855	1.2897	-0.0014222	-1.0029	-2.487	0	0.56254	-2.1949	-0.91446	0.56256	-2.1949	0.91444
123	-180	-180	-60	2.06788	270	64.876	64.818	113.345	0	0	0	1.2004	0	0	2.3899	0.81686	0	0	2.0679	0	2.4282	1.4608	-0.88182	2.4439	1.4206	0.90937	3.2368	0.1325	-0.021193	1.0076	2.4313	0	-0.54976	2.3618	-0.89247	-0.54694	2.3545	0.89653
124	-180	-180	-60	2.06788	116.36	34.8995	34.7989	103.709	0	0	0	1.1975	0	0	1.7949	1.3756	0	-0.91817	-1.8529	0	1.4682	1.9144	-0.89089	1.4661	1.9155	0.8894	2.8778	1.2693	0.001313	-1.9482	-1.5202	0	-0.56538	-2.3111	-0.91691	-0.56536	-2.311	0.91693
125	-180	-180	-60	2.06788	243.64	32.9413	32.8599	104.126	0	0	0	1.1933	0	0	2.0458	1.2014	0	-0.91817	1.8529	0	1.8324	1.7919	-0.89332	1.8302	1.7937	0.89159	3.0877	0.88817	0.0014981	-0.21623	2.679	0	-1.505	1.7616	-0.90771	-1.5051	1.7617	0.90763
126	-180	-180	-60	2.44672	180	59.5379	82.6381	105.125	0	0	0	1.1717	0	0	1.9948	1.2815	0	-2.4467	0	0	1.7472	1.8523	-0.89516	1.7436	1.855	0.89237	3.0456	1.0049	0.0024854	-3.196	0.78408	0	-2.2183	-0.50019	-0.92847	-2.2183	-0.50023	0.92846
127	-180	-180	-60	2.44672	90	51.2095	56.8972	111.717	0	0	0	1.1834	0	0	1.8897	1.3434	0	0	-2.4467	0	1.5999	1.8994	-0.89239	1.5996	1.8996	0.89218	2.9604	1.1552	0.00017966	-0.98728	-2.8919	0	0.55417	-2.422	-0.9266	0.55417	-2.422	0.9266
128	-180	-180	-60	2.44672	270	62.1307	68.3305	106.911	0	0	0	1.1748	0	0	2.28	0.94117	0	0	2.4467	0	2.2175	1.5647	-0.89233	2.2216	1.5589	0.89667	3.2054	0.36692	-0.0036793	0.88777	3.0659	0	-0.58585	2.4721	-0.91208	-0.58473	2.4705	0.91284
129	-180	-180	-60	2.44672	116.36	48.6229	53.9094	108.807	0	0	0	1.178	0	0	1.8993	1.3321	0	-1.0864	-2.1923	0	1.6141	1.8886	-0.89337	1.6116	1.8902	0.89154	2.9678	1.1328	0.0016184	-2.0822	-1.773	0	-0.67815	-2.5648	-0.92954	-0.67813	-2.5647	0.92956
130	-180	-180	-60	2.44672	243.64	45.7629	48.2926	107.331	0	0	0	1.1755	0	0	2.0262	1.2227	0	-1.0864	2.1923	0	1.7957	1.7984	-0.89729	1.7824	1.8087	0.88701	3.0715	0.92272	0.0089914	-0.37613	3.0103	0	-1.619	1.9988	-0.92177	-1.6201	1.9997	0.92132
131	-180	-180	60	1.8	180	77.2802	77.1891	114.634	0	0	0	1.2241	0	0	1.8988	1.3921	0	-1.8	0	0	1.5926	1.9431	0.89357	2.9806	1.2484	-0.0020103	1.5894	1.9451	-0.89124	-2.2124	1.0063	0	-1.9622	-0.56234	-0.90945	-1.9622	-0.56229	0.90949
132	-180	-180	60	1.8	90	26.1776	26.1292	100.015	0	0	0	1.2387	0	0	1.8043	1.3828	0	0	-1.8	0	1.4725	1.9262	0.88832	2.8908	1.307	0.00040385	1.4732	1.9259	-0.88878	-1.021	-2.1859	0	0.54011	-2.0443	-0.90535	0.54011	-2.0443	0.90535
133	-180	-180	60	1.8	270	61.8809	61.8479	111.711	0	0	0	1.2445	0	0	2.4111	0.86237	0	0	1.8	0	2.4569	1.5228	0.87277	3.2714	0.19496	0.027819	2.4739	1.4659	-0.91225	0.97575	2.2283	0	-0.56129	2.1118	-0.88333	-0.56384	2.1176	0.87969
134	-180	-180	60	1.8	116.36	17.1828	17.1203	88.8756	0	0	0	1.2138	0	0	1.7748	1.3778	0	-0.79923	-1.6128	0	1.4384	1.9141	0.88986	2.8609	1.3025	-0.002224	1.4347	1.916	-0.88732	-1.85	-1.3464	0	-0.472	-2.1154	-0.90642	-0.47201	-2.1155	0.90638
135	-180	-180	60	1.8	243.64	19.9526	19.9048	96.4187	0	0	0	1.2145	0	0	2.0562	1.2099	0	-0.79923	1.6128	0	1.8566	1.8185	0.88564	3.0955	0.88788	0.010777	1.8718	1.8046	-0.8984	-0.10773	2.4476	0	-1.4126	1.5768	-0.89695	-1.4133	1.5772	0.89646
136	-180	-180	60	1.8	96.8508	19.214	19.1587	94.3426	0	0	0	1.2292	0	0	1.7968	1.3785	0	-0.21471	-1.7871	0	1.4654	1.9212	0.8886	2.8829	1.2999	-0.00014484	1.4652	1.9213	-0.88844	-1.2791	-2.0148	0	0.29232	-2.1018	-0.90505	0.29232	-2.1018	0.90505
137	-180	-180	60	1.8	145.558	43.8382	43.7731	98.4885	0	0	0	1.2095	0	0	1.7532	1.3901	0	-1.4845	-1.018	0	1.4046	1.9132	0.89246	2.841	1.327	-0.0058039	1.3948	1.9179	-0.88574	-2.1676	-0.1829	0	-1.5011	-1.6166	-0.90762	-1.5013	-1.6169	0.90741
138	-180	-180	60	1.8	214.442	35.8509	35.7823	101.547	0	0	0	1.2066	0	0	1.9578	1.3115	0	-1.4845	1.018	0	1.6937	1.8858	0.89141	3.0251	1.0974	0.00041186	1.6944	1.8854	-0.89188	-1.3994	2.1057	0	-1.9282	0.61345	-0.90255	-1.9282	0.61345	0.90254
139	-180	-180	60	1.8	263.149	42.9575	42.9302	104.341	0	0	0	1.2326	0	0	2.3094	0.97975	0	-0.21471	1.7871	0	2.2803	1.6361	0.87475	3.2335	0.40476	0.026985	2.3048	1.5862	-0.91098	0.71586	2.3166	0	-0.80438	2.017	-0.88791	-0.80661	2.0209	0.88544
140	-180	-180	60	1.1	180	111.996	112.075	144.944	0	0	0	1.2249	0	0	1.8367	1.3807	0	-1.1	0	0	1.5223	1.9373	0.88836	2.9197	1.2651	0.0041299	1.5291	1.9335	-0.8931	-1.7537	0.9752	0	-1.5812	-0.60133	-0.83644	-1.581	-0.60119	0.83656
141	-180	-180	60	1.1	90	142.047	142.165	213.065	0	0	0	1.3492	0	0	1.9424	1.3508	0	0	-1.1	0	1.6322	1.9161	0.88558	3.0276	1.2489	0.00021925	1.6325	1.9159	-0.88584	-1.0631	-1.5297	0	0.38134	-1.6873	-0.86331	0.38133	-1.6873	0.86331
142	-180	-180	60	1.1	270	173.225	173.335	223.303	0	0	0	1.4141	0	0	2.379	1.0632	0	0	1.1	0	2.3107	1.7355	0.87016	3.3404	0.55237	0.01987	2.3316	1.6993	-0.89841	0.71273	1.9269	0	-0.7601	1.506	-0.78881	-0.76501	1.5077	0.78385
143	-180	-180	60	1.1	116.36	89.8864	90.0133	153.205	0	0	0	1.2634	0	0	1.8356	1.3479	0	-0.48842	-0.98562	0	1.5155	1.9045	0.88701	2.9221	1.2649	-0.001738	1.5126	1.906	-0.88501	-1.5999	-0.99791	0	-0.23123	-1.6684	-0.85115	-0.23116	-1.6684	0.85107
144	-180	-180	60	1.1	243.64	99.3257	99.4534	176.273	0	0	0	1.283	0	0	2.0635	1.2552	0	-0.48842	0.98562	0	1.876	1.9011	0.86646	3.1013	0.93054	0.030615	1.9178	1.8578	-0.90531	0.057317	1.948	0	-1.2423	1.106	-0.82701	-1.2466	1.1056	0.82313
145	-180	-180	60	1.1	96.8508	119.909	120.074	192.751	0	0	0	1.3166	0	0	1.9021	1.3486	0	-0.13121	-1.0921	0	1.5893	1.9121	0.88571	2.9879	1.2539	-0.00017202	1.589	1.9123	-0.8855	-1.2107	-1.4216	0	0.23894	-1.6955	-0.85799	0.23894	-1.6956	0.85798
146	-180	-180	60	1.1	145.558	97.0352	97.1327	139.715	0	0	0	1.2343	0	0	1.8067	1.3578	0	-0.90717	-0.62212	0	1.4806	1.9063	0.88936	2.8931	1.2737	-0.0025797	1.4763	1.9085	-0.88636	-1.9289	-0.14715	0	-0.97535	-1.3815	-0.84524	-0.97536	-1.3818	0.84507
147	-180	-180	60	1.1	214.442	96.0955	96.207	149.867	0	0	0	1.2368	0	0	1.8771	1.3722	0	-0.90717	0.62212	0	1.59	1.9577	0.87928	2.9526	1.211	0.014922	1.6134	1.9429	-0.89621	-0.85724	1.7794	0	-1.6138	0.39563	-0.83895	-1.6147	0.39488	0.83792
148	-180	-180	60	1.1	263.149	145.257	145.42	207.005	0	0	0	1.3637	0	0	2.2861	1.1142	0	-0.13121	1.0921	0	2.1915	1.7848	0.86698	3.2688	0.64673	0.025811	2.2202	1.7393	-0.903	0.56244	1.9324	0	-0.88147	1.4279	-0.80359	-0.8872	1.4294	0.79788
149	-180	-180	60	2.5	180	58.3103	82.3182	103.759	0	0	0	1.1713	0	0	1.993	1.2822	0	-2.5	0	0	1.7447	1.8526	0.89518	3.0441	1.0066	-0.00253	1.741	1.8555	-0.89233	-3.2761	0.75704	0	-2.2409	-0.48326	-0.92911	-2.2409	-0.48322	0.92912
150	-180	-180	60	2.5	90	51.4978	58.9096	110.644	0	0	0	1.1809	0	0	1.9021	1.3365	0	0	-2.5	0	1.6175	1.8943	0.89277	2.9707	1.137	-0.00043506	1.6168	1.8948	-0.89228	-0.98611	-2.9469	0	0.551	-2.4542	-0.92751	0.55101	-2.4542	0.92751
151	-180	-180	60	2.5	270	61.2311	68.8414	105.596	0	0	0	1.1738	0	0	2.2657	0.96154	0	0	2.5	0	2.1916	1.5831	0.89272	3.201	0.40336	0.0025528	2.1946	1.5791	-0.89572	0.8682	3.1471	0	-0.58076	2.486	-0.91493	-0.5816	2.4871	0.91441
152	-180	-180	60	2.5	116.36	49.1973	56.0921	108.113	0	0	0	1.1764	0	0	1.9113	1.3263	0	-1.11	-2.24	0	1.6308	1.8846	0.89362	2.9778	1.1168	-0.0016714	1.6282	1.8864	-0.89173	-2.0999	-1.8073	0	-0.6934	-2.5989	-0.93085	-0.69342	-2.599	0.93084
153	-180	-180	60	2.5	243.64	46.5409	50.2268	106.887	0	0	0	1.1743	0	0	2.0225	1.2282	0	-1.11	2.24	0	1.7898	1.8028	0.89728	3.0685	0.93083	-0.0090007	1.7764	1.813	-0.88701	-0.39928	3.0573	0	-1.6332	2.0298	-0.92312	-1.6321	2.0289	0.92355
154	-180	-180	60	2.5	96.8508	49.8345	56.6016	109.373	0	0	0	1.18	0	0	1.9026	1.3347	0	-0.29821	-2.4822	0	1.6183	1.8924	0.89294	2.971	1.1342	-0.00074805	1.6172	1.8932	-0.8921	-1.3615	-2.6809	0	0.24826	-2.5585	-0.92893	0.24827	-2.5585	0.92892
155	-180	-180	60	2.5	145.558	54.5951	68.7622	106.893	0	0	0	1.1722	0	0	1.9423	1.3087	0	-2.0618	-1.4139	0	1.6735	1.8706	0.89476	3.0031	1.0731	-0.0025662	1.6696	1.8733	-0.89187	-2.5263	-0.44073	0	-1.9278	-1.9422	-0.93351	-1.928	-1.9423	0.93348
156	-180	-180	60	2.5	214.442	51.2954	60.0102	107.352	0	0	0	1.1733	0	0	1.9887	1.2772	0	-2.0618	1.4139	0	1.7386	1.8465	0.89576	3.0419	1.0088	-0.0049464	1.7312	1.8519	-0.89017	-1.9635	2.4924	0	-2.2932	0.91089	-0.92751	-2.2929	0.91088	0.92757
157	-180	-180	60	2.5	263.149	54.3037	59.2901	106.186	0	0	0	1.1741	0	0	2.185	1.0571	0	-0.29821	2.4822	0	2.0516	1.6653	0.89508	3.1679	0.58948	-0.0025351	2.0483	1.6688	-0.89214	0.56126	3.1398	0	-0.87579	2.4483	-0.91603	-0.87516	2.4475	0.91639
158	-180	-180	60	1.30503	180	52.1523	52.1842	87.501	0	0	0	1.2211	0	0	1.8484	1.3897	0	-1.305	0	0	1.5315	1.9387	0.89147	2.9319	1.2716	0.00024075	1.5319	1.9384	-0.89176	-1.8502	0.98179	0	-1.6941	-0.56509	-0.86714	-1.6941	-0.56508	0.86714
159	-180	-180	60	1.30503	90	44.8269	44.9078	119.263	0	0	0	1.292	0	0	1.8809	1.3591	0	0	-1.305	0	1.5628	1.9143	0.88781	2.9665	1.2678	-0.0020261	1.5594	1.9161	-0.88546	-1.0426	-1.7042	0	0.43884	-1.7822	-0.87982	0.43886	-1.7822	0.8798
160	-180	-180	60	1.30503	270	85.5018	85.5937	134.293	0	0	0	1.3376	0	0	2.4037	0.97433	0	0	1.305	0	2.3893	1.6434	0.87219	3.3236	0.39217	0.018704	2.4042	1.6052	-0.90023	0.81969	2.0017	0	-0.64908	1.6795	-0.83382	-0.65261	1.6819	0.83008
161	-180	-180	60	1.30503	116.36	11.2011	11.2709	80.3806	0	0	0	1.241	0	0	1.8051	1.3575	0	-0.57945	-1.1693	0	1.476	1.9032	0.88899	2.892	1.2843	-0.0041523	1.4691	1.9067	-0.88419	-1.6699	-1.0821	0	-0.30285	-1.7813	-0.8737	-0.3028	-1.7814	0.8736
162	-180	-180	60	1.30503	243.64	21.2218	21.2841	99.9246	0	0	0	1.2559	0	0	2.0695	1.2401	0	-0.57945	1.1693	0	1.8873	1.8789	0.8709	3.1039	0.90426	0.02757	1.9243	1.8394	-0.90565	0.032085	2.0742	0	-1.2676	1.2442	-0.8584	-1.2701	1.2444	0.8564
163	-180	-180	60	1.30503	96.8508	28.1578	28.235	105.223	0	0	0	1.2733	0	0	1.8552	1.3559	0	-0.15567	-1.2957	0	1.5353	1.91	0.88774	2.9413	1.2696	-0.0021863	1.5316	1.9119	-0.88521	-1.2247	-1.5792	0	0.26257	-1.801	-0.87656	0.2626	-1.801	0.87653
164	-180	-180	60	1.30503	145.558	30.905	30.9449	77.0006	0	0	0	1.2256	0	0	1.7846	1.3708	0	-1.0763	-0.73808	0	1.4466	1.9055	0.89181	2.8724	1.301	-0.0065376	1.4356	1.9111	-0.8841	-1.9989	-0.14424	0	-1.1288	-1.4238	-0.87055	-1.1289	-1.4244	0.87017
165	-180	-180	60	1.30503	214.442	28.5502	28.5934	87.3751	0	0	0	1.2267	0	0	1.8987	1.3646	0	-1.0763	0.73808	0	1.6156	1.9446	0.8837	2.9737	1.1957	0.011258	1.6331	1.9332	-0.89647	-0.99385	1.8548	0	-1.6924	0.46167	-0.8666	-1.6929	0.4614	0.86619
166	-180	-180	60	1.30503	263.149	59.23	59.3342	121.328	0	0	0	1.3076	0	0	2.3072	1.059	0	-0.15567	1.2957	0	2.2507	1.7291	0.86786	3.2625	0.53773	0.026823	2.2761	1.6778	-0.90643	0.63489	2.025	0	-0.81841	1.5984	-0.84208	-0.82225	1.6006	0.83827
167	-180	-180	60	2.29497	180	64.0525	83.7341	110.078	0	0	0	1.1734	0	0	2.0012	1.2794	0	-2.295	0	0	1.7558	1.8514	0.89509	3.0511	0.9994	-0.0023088	1.7524	1.8539	-0.89249	-3.0111	0.81665	0	-2.1368	-0.53349	-0.92546	-2.1367	-0.53346	0.92548
168	-180	-180	60	2.29497	90	49.1976	50.6223	113.74	0	0	0	1.1936	0	0	1.8472	1.3659	0	0	-2.295	0	1.5398	1.9154	0.89104	2.9246	1.2173	0.00068801	1.5409	1.9147	-0.89182	-0.99103	-2.735	0	0.56205	-2.3304	-0.92206	0.56204	-2.3304	0.92207
169	-180	-180	60	2.29497	270	64.5169	66.8345	110.588	0	0	0	1.1798	0	0	2.3276	0.87636	0	0	2.295	0	2.307	1.507	0.88982	3.2174	0.24875	0.0093782	2.3162	1.4912	-0.90116	0.95202	2.8034	0	-0.5803	2.4402	-0.90645	-0.58241	2.4441	0.90447
170	-180	-180	60	2.29497	116.36	45.7059	47.0317	109.626	0	0	0	1.1841	0	0	1.8556	1.3522	0	-1.019	-2.0563	0	1.553	1.9014	0.89245	2.9308	1.1903	-0.0014288	1.5508	1.9028	-0.89084	-2.0304	-1.674	0	-0.63571	-2.4676	-0.92487	-0.63572	-2.4677	0.92486
171	-180	-180	60	2.29497	243.64	42.2959	42.4679	107.669	0	0	0	1.1805	0	0	2.0356	1.2079	0	-1.019	2.0563	0	1.811	1.7871	0.89714	3.0795	0.90237	-0.0086548	1.7983	1.7971	-0.88725	-0.31337	2.879	0	-1.5805	1.9136	-0.91522	-1.5795	1.9128	0.9157
172	-180	-180	60	2.29497	96.8508	46.3484	47.4546	111.352	0	0	0	1.1912	0	0	1.8477	1.3624	0	-0.27376	-2.2786	0	1.5411	1.9117	0.89136	2.9246	1.2115	0.00012933	1.5413	1.9115	-0.89151	-1.3342	-2.4986	0	0.26995	-2.4279	-0.92278	0.26994	-2.4279	0.92278
173	-180	-180	60	2.29497	145.558	56.2652	63.5169	111.653	0	0	0	1.1766	0	0	1.8984	1.3305	0	-1.8927	-1.298	0	1.6115	1.8845	0.89432	2.9671	1.1324	-0.0030749	1.6067	1.8876	-0.89084	-2.4044	-0.34854	0	-1.8271	-1.8499	-0.92858	-1.8273	-1.8501	0.92851
174	-180	-180	60	2.29497	214.442	50.8459	53.9962	110.915	0	0	0	1.178	0	0	1.9907	1.2743	0	-1.8927	1.298	0	1.7413	1.8449	0.89561	3.045	1.0092	-0.0053328	1.7333	1.8507	-0.88959	-1.8164	2.3798	0	-2.1876	0.8158	-0.92164	-2.1873	0.81579	0.92173
175	-180	-180	60	2.29497	263.149	54.1892	54.9756	109.093	0	0	0	1.1807	0	0	2.2349	0.99543	0	-0.27376	2.2786	0	2.1405	1.6152	0.89276	3.1901	0.47375	0.0038485	2.1451	1.6094	-0.8973	0.64092	2.8531	0	-0.86174	2.3707	-0.90766	-0.86243	2.3718	0.90711
176	-180	-180	60	1.15328	180	86.1269	86.1913	119.86	0	0	0	1.2229	0	0	1.8404	1.3835	0	-1.1533	0	0	1.5255	1.9377	0.88938	2.9235	1.2664	0.0029267	1.5303	1.935	-0.89276	-1.7766	0.97511	0	-1.6076	-0.58725	-0.84672	-1.6075	-0.58715	0.84681
177	-180	-180	60	1.15328	90	105.053	105.159	177.226	0	0	0	1.3282	0	0	1.9224	1.3527	0	0	-1.1533	0	1.6103	1.9148	0.88644	3.0076	1.2528	-0.00077667	1.609	1.9155	-0.88554	-1.0562	-1.5727	0	0.39515	-1.7099	-0.86879	0.39516	-1.7099	0.86878
178	-180	-180	60	1.15328	270	139.874	139.977	189.263	0	0	0	1.3866	0	0	2.3869	1.0325	0	0	1.1533	0	2.3358	1.703	0.87169	3.3354	0.4982	0.017658	2.353	1.6694	-0.8974	0.74468	1.9454	0	-0.71985	1.5506	-0.80482	-0.72439	1.5525	0.80011
179	-180	-180	60	1.15328	116.36	57.8965	57.9946	123.315	0	0	0	1.2556	0	0	1.8262	1.3502	0	-0.51208	-1.0334	0	1.5035	1.9034	0.88772	2.9128	1.2699	-0.0027062	1.499	1.9057	-0.8846	-1.617	-1.018	0	-0.25021	-1.6945	-0.85813	-0.25013	-1.6946	0.85804
180	-180	-180	60	1.15328	243.64	67.7863	67.8855	145.519	0	0	0	1.274	0	0	2.0661	1.2506	0	-0.51208	1.0334	0	1.8814	1.8951	0.86753	3.1023	0.92085	0.029932	1.9219	1.8523	-0.90554	0.05336	1.9787	0	-1.2444	1.1419	-0.83696	-1.248	1.1417	0.83373
181	-180	-180	60	1.53212	180	53.8066	53.7779	90.0085	0	0	0	1.2234	0	0	1.8585	1.3954	0	-1.5321	0	0	1.5402	1.9406	0.89303	2.9429	1.2771	-0.0019214	1.537	1.9424	-0.89078	-1.9794	1.0019	0	-1.8317	-0.55438	-0.88949	-1.8317	-0.55439	0.88948
182	-180	-180	60	1.53212	90	20.0453	20.0618	95.4045	0	0	0	1.2632	0	0	1.8373	1.3704	0	0	-1.5321	0	1.5109	1.9186	0.88836	2.9238	1.2916	-0.0014943	1.5084	1.9199	-0.88663	-1.032	-1.9149	0	0.49505	-1.8999	-0.89282	0.49506	-1.8999	0.89281
183	-180	-180	60	1.53212	270	61.8007	61.8272	110.87	0	0	0	1.2936	0	0	2.4142	0.92284	0	0	1.5321	0	2.4356	1.5914	0.87043	3.3043	0.29589	0.02491	2.4517	1.5391	-0.90766	0.9049	2.0973	0	-0.59607	1.8729	-0.86115	-0.5989	1.8766	0.85778
184	-180	-180	60	1.53212	116.36	1.51011	1.51378	73.0191	0	0	0	1.2283	0	0	1.7833	1.3688	0	-0.68029	-1.3728	0	1.4475	1.9076	0.8896	2.8704	1.3017	-0.0039093	1.441	1.9109	-0.8851	-1.7525	-1.1939	0	-0.38053	-1.9288	-0.89113	-0.38052	-1.9289	0.89105
185	-180	-180	60	1.53212	243.64	9.23548	9.23227	87.7544	0	0	0	1.2371	0	0	2.066	1.226	0	-0.68029	1.3728	0	1.8784	1.8527	0.87714	3.1021	0.89451	0.021595	1.9079	1.8229	-0.90366	-0.020359	2.235	0	-1.3269	1.3965	-0.88014	-1.3284	1.397	0.87906
186	-180	-180	60	2.06788	180	74.1198	85.8351	120.006	0	0	0	1.18	0	0	2.011	1.2833	0	-2.0679	0	0	1.7672	1.8571	0.8947	3.0611	1.0025	-0.0016021	1.7648	1.8589	-0.8929	-2.7829	0.82364	0	-1.9946	-0.56544	-0.91846	-1.9946	-0.56541	0.91848
187	-180	-180	60	2.06788	90	39.9624	39.8701	109.832	0	0	0	1.2146	0	0	1.8014	1.3865	0	0	-2.0679	0	1.4735	1.9289	0.88912	2.8855	1.2897	0.0014222	1.4759	1.9277	-0.89073	-1.0029	-2.487	0	0.56256	-2.1949	-0.91444	0.56254	-2.1949	0.91446
188	-180	-180	60	2.06788	270	64.876	64.818	113.345	0	0	0	1.2004	0	0	2.3899	0.81686	0	0	2.0679	0	2.4282	1.4608	0.88182	3.2368	0.1325	0.021193	2.4439	1.4206	-0.90937	1.0076	2.4313	0	-0.54694	2.3545	-0.89653	-0.54976	2.3618	0.89247
189	-180	-180	60	2.06788	116.36	34.8995	34.7989	103.709	0	0	0	1.1975	0	0	1.7949	1.3756	0	-0.91817	-1.8529	0	1.4682	1.9144	0.89089	2.8778	1.2693	-0.001313	1.4661	1.9155	-0.8894	-1.9482	-1.5202	0	-0.56536	-2.311	-0.91693	-0.56538	-2.3111	0.91691
190	-180	-180	60	2.06788	243.64	32.9413	32.8599	104.126	0	0	0	1.1933	0	0	2.0458	1.2014	0	-0.91817	1.8529	0	1.8324	1.7919	0.89332	3.0877	0.88817	-0.0014981	1.8302	1.7937	-0.89159	-0.21623	2.679	0	-1.5051	1.7617	-0.90763	-1.505	1.7616	0.90771
191	-180	-180	60	2.44672	180	59.5379	82.6382	105.125	0	0	0	1.1717	0	0	1.9948	1.2815	0	-2.4467	0	0	1.7472	1.8523	0.89516	3.0456	1.0049	-0.0024853	1.7436	1.855	-0.89237	-3.196	0.7841	0	-2.2183	-0.50025	-0.92845	-2.2183	-0.50021	0.92847
192	-180	-180	60	2.44672	90	51.2095	56.8972	111.717	0	0	0	1.1834	0	0	1.8897	1.3434	0	0	-2.4467	0	1.5999	1.8994	0.89239	2.9604	1.1552	-0.00017966	1.5996	1.8996	-0.89218	-0.98728	-2.8919	0	0.55417	-2.422	-0.9266	0.55417	-2.422	0.9266
193	-180	-180	60	2.44672	270	62.1307	68.3305	106.911	0	0	0	1.1748	0	0	2.28	0.94117	0	0	2.4467	0	2.2175	1.5647	0.89233	3.2054	0.36692	0.0036793	2.2216	1.5589	-0.89667	0.88777	3.0659	0	-0.58473	2.4705	-0.91284	-0.58585	2.4721	0.91208
194	-180	-180	60	2.44672	116.36	48.6229	53.9094	108.807	0	0	0	1.178	0	0	1.8993	1.3321	0	-1.0864	-2.1923	0	1.6141	1.8886	0.89337	2.9678	1.1328	-0.0016184	1.6116	1.8902	-0.89154	-2.0822	-1.773	0	-0.67813	-2.5647	-0.92956	-0.67815	-2.5648	0.92954
195	-180	-180	60	2.44672	243.64	45.7629	48.2926	107.331	0	0	0	1.1755	0	0	2.0262	1.2227	0	-1.0864	2.1923	0	1.7957	1.7984	0.89729	3.0715	0.92272	-0.0089914	1.7824	1.8087	-0.88701	-0.37613	3.0103	0	-1.6201	1.9997	-0.92132	-1.619	1.9988	0.92177
196	-180	-180	-140	1.8	180	76.4284	76.3336	116.134	0	0	0	1.2246	0	0	1.9135	1.3686	0	-1.8	0	0	2.7765	1.312	-0.66818	1.2269	2.1695	-0.29218	2.2842	1.5402	1.0158	-2.209	1.0074	0	-1.9644	-0.56224	-0.90915	-1.9632	-0.56142	0.90976
197	-180	-180	-140	1.8	90	24.6958	24.6435	102.269	0	0	0	1.2397	0	0	1.8102	1.3683	0	0	-1.8	0	2.6742	1.375	-0.66699	1.0782	2.1299	-0.28273	2.1814	1.5678	1.0102	-1.0213	-2.185	0	0.53823	-2.0436	-0.90673	0.54123	-2.0484	0.90373
198	-180	-180	-140	1.8	270	64.3607	64.3423	115.666	0	0	0	1.2446	0	0	2.4764	0.75394	0	0	1.8	0	3.1351	0.20865	-0.67881	2.5257	1.8168	-0.27192	2.8833	0.63058	1.0078	0.98482	2.2043	0	-0.56469	2.135	-0.87222	-0.54799	2.0989	0.89531
199	-180	-180	-140	1.8	116.36	15.6836	15.6176	91.2505	0	0	0	1.2151	0	0	1.7837	1.3624	0	-0.79923	-1.6128	0	2.647	1.3668	-0.66705	1.0438	2.1148	-0.28351	2.1507	1.5598	1.0113	-1.8499	-1.346	0	-0.47229	-2.1112	-0.90878	-0.4736	-2.121	0.90389
200	-180	-180	-140	1.8	243.64	20.8641	20.8064	99.3825	0	0	0	1.2148	0	0	2.1198	1.15	0	-0.79923	1.6128	0	2.9433	0.90318	-0.67108	1.6701	2.0949	-0.30386	2.5288	1.2398	1.0099	-0.1335	2.4669	0	-1.4228	1.5739	-0.88979	-1.4051	1.5645	0.90152
201	-180	-180	-140	1.8	96.8508	17.7369	17.6781	96.6705	0	0	0	1.2303	0	0	1.8031	1.3641	0	-0.21471	-1.7871	0	2.6669	1.3682	-0.66695	1.0712	2.1253	-0.28333	2.1734	1.5626	1.0104	-1.2792	-2.014	0	0.29049	-2.1002	-0.90664	0.29286	-2.1063	0.90329
202	-180	-180	-140	1.8	145.558	42.362	42.2937	100.679	0	0	0	1.2108	0	0	1.7699	1.3697	0	-1.4845	-1.018	0	2.6332	1.3785	-0.66789	1.0129	2.1055	-0.2817	2.1322	1.5647	1.0136	-2.1671	-0.1825	0	-1.496	-1.6097	-0.91216	-1.5079	-1.6239	0.9027
203	-180	-180	-140	1.8	214.442	34.975	34.9024	103.946	0	0	0	1.2066	0	0	1.9716	1.2916	0	-1.4845	1.018	0	2.8274	1.1784	-0.66631	1.3478	2.1394	-0.29755	2.3532	1.4451	1.0128	-1.4066	2.1062	0	-1.932	0.61135	-0.8996	-1.921	0.61253	0.9055
204	-180	-180	-140	1.8	263.149	45.6959	45.663	108.094	0	0	0	1.2327	0	0	2.3843	0.88245	0	-0.21471	1.7871	0	3.0967	0.40979	-0.6784	2.2966	1.9332	-0.28712	2.8034	0.81883	1.0079	0.72054	2.3053	0	-0.8107	2.0344	-0.87868	-0.79334	2.0063	0.89731
205	-180	-180	-140	1.1	180	111.269	111.343	146.385	0	0	0	1.2243	0	0	1.852	1.3643	0	-1.1	0	0	2.7146	1.3333	-0.6684	1.1576	2.1575	-0.29309	2.2251	1.554	1.0117	-1.7535	0.97616	0	-1.5763	-0.5952	-0.84098	-1.5861	-0.60386	0.83319
206	-180	-180	-140	1.1	90	140.937	141.052	214.308	0	0	0	1.3483	0	0	1.9465	1.34	0	0	-1.1	0	2.8136	1.3321	-0.66709	1.2386	2.1222	-0.28198	2.335	1.5474	1.0065	-1.0634	-1.529	0	0.37689	-1.6854	-0.86633	0.38474	-1.6884	0.86106
207	-180	-180	-140	1.1	270	176.169	176.276	226.087	0	0	0	1.4061	0	0	2.4573	0.97188	0	0	1.1	0	3.2106	0.56598	-0.67918	2.2687	2.0222	-0.28347	2.8852	0.97341	1.0108	0.72535	1.9185	0	-0.77344	1.5129	-0.77104	-0.72808	1.4985	0.81521
208	-180	-180	-140	1.1	116.36	88.6681	88.791	154.685	0	0	0	1.2636	0	0	1.8456	1.3347	0	-0.48842	-0.98562	0	2.7125	1.3372	-0.66587	1.1236	2.1053	-0.28331	2.2271	1.5453	1.0071	-1.5999	-0.99612	0	-0.23729	-1.6623	-0.85667	-0.22842	-1.6735	0.84642
209	-180	-180	-140	1.1	243.64	101.359	101.497	179.343	0	0	0	1.2841	0	0	2.1375	1.2018	0	-0.48842	0.98562	0	2.9541	0.95277	-0.67971	1.7454	2.181	-0.29023	2.5644	1.2859	1.005	0.054239	1.9478	0	-1.2569	1.1035	-0.81361	-1.2296	1.1064	0.83822
210	-180	-180	-140	1.1	96.8508	118.741	118.902	194.28	0	0	0	1.3162	0	0	1.9075	1.3373	0	-0.13121	-1.0921	0	2.7748	1.3344	-0.66651	1.1952	2.1163	-0.28209	2.2944	1.5469	1.0063	-1.2111	-1.4206	0	0.23288	-1.6925	-0.86235	0.24319	-1.698	0.85446
211	-180	-180	-140	1.1	145.558	95.9628	96.0568	141.133	0	0	0	1.2341	0	0	1.8233	1.3408	0	-0.90717	-0.62212	0	2.689	1.3359	-0.66664	1.0992	2.1096	-0.28522	2.1991	1.5431	1.0098	-1.9281	-0.14583	0	-0.97606	-1.3684	-0.85395	-0.97693	-1.3924	0.83698
212	-180	-180	-140	1.1	214.442	95.7923	95.9043	151.524	0	0	0	1.2382	0	0	1.9049	1.3503	0	-0.90717	0.62212	0	2.7601	1.2733	-0.67209	1.2739	2.1924	-0.29376	2.2936	1.5269	1.0076	-0.86349	1.7791	0	-1.6209	0.38892	-0.83076	-1.6057	0.40111	0.84703
213	-180	-180	-140	1.1	263.149	148.1	148.26	210.517	0	0	0	1.3605	0	0	2.3645	1.0363	0	-0.13121	1.0921	0	3.1346	0.6661	-0.68029	2.138	2.0762	-0.2828	2.7956	1.0506	1.0084	0.57088	1.9253	0	-0.89775	1.4329	-0.78527	-0.85785	1.4237	0.82386
214	-180	-180	-140	2.5	180	57.6111	81.587	106.334	0	0	0	1.172	0	0	1.9964	1.2696	0	-2.5	0	0	2.8422	1.1132	-0.66675	1.3897	2.123	-0.30543	2.3673	1.4027	1.0169	-3.2854	0.74756	0	-2.2379	-0.48268	-0.92855	-2.2343	-0.47844	0.92967
215	-180	-180	-140	2.5	90	50.5838	57.8626	113.259	0	0	0	1.1823	0	0	1.9032	1.3254	0	0	-2.5	0	2.7585	1.2328	-0.66757	1.2426	2.1411	-0.29842	2.2708	1.4826	1.0153	-0.98938	-2.9395	0	0.55024	-2.4568	-0.92812	0.55257	-2.4603	0.92688
216	-180	-180	-140	2.5	270	62.0337	67.3594	108.866	0	0	0	1.1698	0	0	2.2779	0.90769	0	0	2.5	0	3.0485	0.51572	-0.66422	1.9131	1.8949	-0.3116	2.6719	0.94681	1.0178	0.70748	3.3257	0	-0.65729	2.4737	-0.862	-0.50295	2.3545	0.9496
217	-180	-180	-140	2.5	116.36	48.2786	55.0236	110.769	0	0	0	1.1777	0	0	1.9131	1.3145	0	-1.11	-2.24	0	2.7674	1.2131	-0.66718	1.2575	2.1339	-0.29952	2.2804	1.4685	1.0158	-2.0995	-1.8066	0	-0.69255	-2.5957	-0.93171	-0.69624	-2.6047	0.92987
218	-180	-180	-140	2.5	243.64	45.8734	49.1555	109.148	0	0	0	1.1737	0	0	2.0468	1.1944	0	-1.11	2.24	0	2.8889	1.0045	-0.66442	1.4635	2.067	-0.30152	2.426	1.3147	1.0167	-0.4774	3.12	0	-1.6408	2.0123	-0.91484	-1.6054	1.9891	0.92843
219	-180	-180	-140	2.5	96.8508	48.9091	55.5366	111.999	0	0	0	1.1813	0	0	1.9039	1.3233	0	-0.29821	-2.4822	0	2.7591	1.2298	-0.66746	1.2435	2.1392	-0.2986	2.2713	1.4803	1.0154	-1.3624	-2.6757	0	0.24715	-2.5592	-0.92954	0.24859	-2.5646	0.92824
220	-180	-180	-140	2.5	145.558	53.7588	67.7112	109.492	0	0	0	1.1733	0	0	1.9447	1.2962	0	-2.0618	-1.4139	0	2.7962	1.173	-0.66685	1.3066	2.128	-0.30214	2.3126	1.4415	1.0165	-2.5255	-0.44039	0	-1.9211	-1.9384	-0.9347	-1.939	-1.9475	0.93207
221	-180	-180	-140	2.5	214.442	50.5225	59.1207	109.877	0	0	0	1.1738	0	0	1.9932	1.264	0	-2.0618	1.4139	0	2.8411	1.1128	-0.66597	1.3799	2.1142	-0.30353	2.365	1.3998	1.0166	-1.9803	2.4939	0	-2.2951	0.90855	-0.92575	-2.2795	0.90788	0.92912
222	-180	-180	-140	2.5	263.149	54.6732	58.4433	108.931	0	0	0	1.1708	0	0	2.2054	1.007	0	-0.29821	2.4822	0	3.0068	0.6828	-0.66392	1.7587	1.9577	-0.30774	2.5967	1.0744	1.0175	0.41643	3.2995	0	-0.92185	2.4191	-0.88432	-0.82444	2.3417	0.93717
223	-180	-180	-140	1.30503	180	51.2852	51.313	89.1936	0	0	0	1.221	0	0	1.8662	1.3683	0	-1.305	0	0	2.729	1.33	-0.66848	1.1703	2.1621	-0.28817	2.2393	1.5453	1.0139	-1.8501	0.98193	0	-1.6907	-0.56169	-0.87021	-1.6984	-0.56747	0.86409
224	-180	-180	-140	1.30503	90	43.4748	43.5524	121.024	0	0	0	1.2921	0	0	1.8864	1.346	0	0	-1.305	0	2.7526	1.3412	-0.66645	1.1712	2.1238	-0.27857	2.2707	1.544	1.0081	-1.0425	-1.7045	0	0.43799	-1.7812	-0.88072	0.44006	-1.7833	0.87891
225	-180	-180	-140	1.30503	270	87.4333	87.5236	137.539	0	0	0	1.3331	0	0	2.471	0.87544	0	0	1.305	0	3.1862	0.40536	-0.67856	2.3973	1.9467	-0.25763	2.8929	0.79837	1.0088	0.83194	1.988	0	-0.65912	1.6922	-0.81901	-0.62801	1.673	0.85072
226	-180	-180	-140	1.30503	116.36	9.78417	9.8499	82.2383	0	0	0	1.2417	0	0	1.8156	1.3427	0	-0.57945	-1.1693	0	2.6815	1.3492	-0.66589	1.0828	2.1041	-0.27993	2.1928	1.5459	1.0087	-1.6698	-1.0811	0	-0.30536	-1.7772	-0.87697	-0.3023	-1.7859	0.8705
227	-180	-180	-140	1.30503	243.64	22.8758	22.9607	103.216	0	0	0	1.2568	0	0	2.1427	1.1819	0	-0.57945	1.1693	0	2.9556	0.91858	-0.67835	1.763	2.1653	-0.28709	2.5694	1.2485	1.0055	0.027455	2.0753	0	-1.2779	1.2449	-0.84981	-1.2593	1.2432	0.86505
228	-180	-180	-140	1.30503	96.8508	26.7787	26.8523	107.072	0	0	0	1.2736	0	0	1.8617	1.3428	0	-0.15567	-1.2957	0	2.7279	1.3418	-0.66612	1.1428	2.1174	-0.27929	2.2443	1.5435	1.0079	-1.2248	-1.579	0	0.26067	-1.7994	-0.87823	0.26399	-1.803	0.87498
229	-180	-180	-140	1.30503	145.558	29.6011	29.6376	78.7407	0	0	0	1.226	0	0	1.8026	1.3512	0	-1.0763	-0.73808	0	2.6679	1.3536	-0.66698	1.0616	2.1052	-0.27918	2.1752	1.5464	1.0116	-1.9981	-0.14316	0	-1.1274	-1.4137	-0.87773	-1.1321	-1.4338	0.86294
230	-180	-180	-140	1.30503	214.442	27.9476	27.9855	89.4243	0	0	0	1.2275	0	0	1.9229	1.3414	0	-1.0763	0.73808	0	2.7792	1.2576	-0.67025	1.2942	2.1867	-0.29323	2.3104	1.5082	1.0094	-0.99894	1.855	0	-1.6968	0.45832	-0.86212	-1.6876	0.46436	0.87081
231	-180	-180	-140	1.30503	263.149	61.4778	61.5711	125.282	0	0	0	1.3055	0	0	2.3787	0.97495	0	-0.15567	1.2957	0	3.122	0.55499	-0.6802	2.2367	2.0324	-0.26499	2.808	0.93001	1.0069	0.64473	2.0128	0	-0.82796	1.6089	-0.82991	-0.80238	1.5955	0.85441
232	-180	-180	-140	2.29497	180	63.3706	83.0494	112.647	0	0	0	1.174	0	0	2.0049	1.2666	0	-2.295	0	0	2.8501	1.1065	-0.66675	1.4027	2.1232	-0.30583	2.3765	1.3987	1.0168	-3.0176	0.81104	0	-2.1352	-0.53419	-0.92477	-2.1318	-0.53056	0.92622
233	-180	-180	-140	2.29497	90	48.0878	49.432	116.251	0	0	0	1.1952	0	0	1.8492	1.3539	0	0	-2.295	0	2.7085	1.3026	-0.66794	1.1553	2.1442	-0.29345	2.2152	1.5278	1.014	-0.99338	-2.7294	0	0.5604	-2.3318	-0.92306	0.56354	-2.3367	0.92095
234	-180	-180	-140	2.29497	270	66.7057	69.0076	113.376	0	0	0	1.1759	0	0	2.3544	0.80675	0	0	2.295	0	3.0756	0.33535	-0.66828	2.1382	1.8233	-0.32716	2.7534	0.80299	1.0162	0.84097	2.9791	0	-0.64354	2.4195	-0.86651	-0.55526	2.3205	0.93362
235	-180	-180	-140	2.29497	116.36	44.5969	45.8318	112.253	0	0	0	1.1855	0	0	1.8583	1.3398	0	-1.019	-2.0563	0	2.7167	1.2769	-0.66744	1.1694	2.1337	-0.29491	2.2233	1.5089	1.0147	-2.0301	-1.6734	0	-0.63503	-2.4637	-0.92634	-0.63846	-2.4739	0.92322
236	-180	-180	-140	2.29497	243.64	41.8065	41.8739	110.039	0	0	0	1.1793	0	0	2.0678	1.1662	0	-1.019	2.0563	0	2.9073	0.96225	-0.66401	1.5038	2.0507	-0.30393	2.4511	1.2827	1.0161	-0.38036	2.9327	0	-1.5923	1.8986	-0.90563	-1.5604	1.8786	0.92141
237	-180	-180	-140	2.29497	96.8508	45.2279	46.2575	113.899	0	0	0	1.1926	0	0	1.8499	1.3503	0	-0.27376	-2.2786	0	2.709	1.2969	-0.66779	1.1565	2.1409	-0.29375	2.2155	1.5235	1.0141	-1.335	-2.4946	0	0.26823	-2.4277	-0.92384	0.27025	-2.4344	0.92157
238	-180	-180	-140	2.29497	145.558	55.2906	62.332	114.23	0	0	0	1.178	0	0	1.9011	1.3177	0	-1.8927	-1.298	0	2.7568	1.2249	-0.66691	1.2346	2.1288	-0.29861	2.2666	1.4746	1.016	-2.4039	-0.34829	0	-1.8194	-1.8448	-0.931	-1.8373	-1.8557	0.92584
239	-180	-180	-140	2.29497	214.442	50.0213	53.0883	113.411	0	0	0	1.1783	0	0	1.9962	1.2604	0	-1.8927	1.298	0	2.8452	1.1115	-0.66557	1.3828	2.1115	-0.30262	2.3697	1.3978	1.0162	-1.8294	2.3807	0	-2.1906	0.81324	-0.91929	-2.1755	0.81311	0.92394
240	-180	-180	-140	2.29497	263.149	55.6654	56.2919	112.091	0	0	0	1.1767	0	0	2.2644	0.93281	0	-0.27376	2.2786	0	3.0381	0.55064	-0.66605	1.9125	1.9128	-0.32247	2.6614	0.97636	1.0164	0.52769	3.0081	0	-0.90905	2.3438	-0.87838	-0.84076	2.2763	0.92635
241	-180	-180	-140	1.15328	180	85.3509	85.4106	121.39	0	0	0	1.2225	0	0	1.8566	1.3655	0	-1.1533	0	0	2.7192	1.3314	-0.66846	1.1625	2.1596	-0.29133	2.2299	1.5504	1.0125	-1.7765	0.97568	0	-1.6028	-0.58173	-0.85124	-1.6127	-0.59033	0.84288
242	-180	-180	-140	1.15328	90	103.856	103.959	178.658	0	0	0	1.3277	0	0	1.927	1.3411	0	0	-1.1533	0	2.7938	1.3328	-0.66686	1.2179	2.1231	-0.28026	2.3148	1.5439	1.0071	-1.0564	-1.5725	0	0.39346	-1.7089	-0.86994	0.39665	-1.7103	0.86806
243	-180	-180	-140	1.15328	270	142.434	142.534	192.146	0	0	0	1.3798	0	0	2.4617	0.93803	0	0	1.1533	0	3.2032	0.51047	-0.67866	2.3094	1.9972	-0.27283	2.8884	0.91167	1.0104	0.7574	1.9353	0	-0.7343	1.5601	-0.78541	-0.69028	1.5434	0.82925
244	-180	-180	-140	1.15328	116.36	56.609	56.703	124.887	0	0	0	1.2559	0	0	1.8364	1.3365	0	-0.51208	-1.0334	0	2.703	1.3398	-0.66582	1.1114	2.1047	-0.28197	2.2168	1.5442	1.0076	-1.617	-1.0165	0	-0.25482	-1.6894	-0.86263	-0.24829	-1.6993	0.85413
245	-180	-180	-140	1.15328	243.64	69.6952	69.8076	148.696	0	0	0	1.275	0	0	2.1397	1.1958	0	-0.51208	1.0334	0	2.9546	0.94078	-0.67945	1.7545	2.1779	-0.28818	2.5672	1.2723	1.0051	0.050179	1.9787	0	-1.2575	1.1405	-0.82519	-1.2332	1.142	0.84653
246	-180	-180	-140	1.53212	180	52.8858	52.8533	91.8318	0	0	0	1.2235	0	0	1.8769	1.3714	0	-1.5321	0	0	2.7403	1.3318	-0.66842	1.1774	2.1627	-0.28716	2.2488	1.5456	1.0151	-1.9789	1.0021	0	-1.8303	-0.55296	-0.89071	-1.8342	-0.55525	0.88817
247	-180	-180	-140	1.53212	90	18.578	18.591	97.4885	0	0	0	1.2637	0	0	1.8433	1.3563	0	0	-1.5321	0	2.7087	1.3604	-0.66638	1.1174	2.1248	-0.27955	2.2213	1.5554	1.009	-1.0318	-1.9151	0	0.49382	-1.8988	-0.894	0.49618	-1.9023	0.89145
248	-180	-180	-140	1.53212	270	63.6157	63.6494	114.691	0	0	0	1.2913	0	0	2.4777	0.82075	0	0	1.5321	0	3.1646	0.3115	-0.67934	2.48	1.8938	-0.25559	2.8928	0.70835	1.0072	0.91638	2.078	0	-0.6001	1.8888	-0.8513	-0.5817	1.8662	0.87253
249	-180	-180	-140	1.53212	116.36	0	0	75.1987	0	0	0	1.2293	0	0	1.7936	1.3532	0	-0.68029	-1.3728	0	2.6584	1.3637	-0.66633	1.0527	2.1065	-0.2801	2.1658	1.5544	1.0099	-1.7524	-1.1932	0	-0.38171	-1.9249	-0.89381	-0.38116	-1.9338	0.88833
250	-180	-180	-140	1.53212	243.64	10.6238	10.6299	90.9644	0	0	0	1.2381	0	0	2.1376	1.1652	0	-0.68029	1.3728	0	2.9534	0.90434	-0.67565	1.7384	2.1373	-0.29329	2.559	1.2366	1.0069	-0.030756	2.2408	0	-1.3359	1.3975	-0.87335	-1.3203	1.3922	0.88503
251	-180	-180	-140	2.06788	180	73.4571	85.1846	122.456	0	0	0	1.1805	0	0	2.0156	1.2698	0	-2.0679	0	0	2.861	1.1087	-0.66692	1.4167	2.1289	-0.30587	2.3886	1.402	1.0166	-2.7857	0.8213	0	-1.9945	-0.5669	-0.91751	-1.9913	-0.56294	0.91962
252	-180	-180	-140	2.06788	90	38.6094	38.5134	112.169	0	0	0	1.2159	0	0	1.8063	1.3724	0	0	-2.0679	0	2.6684	1.3623	-0.66787	1.0823	2.1389	-0.2875	2.1725	1.564	1.0121	-1.0042	-2.4835	0	0.56033	-2.1952	-0.91583	0.56385	-2.2008	0.91292
253	-180	-180	-140	2.06788	270	68.0608	68.0053	116.138	0	0	0	1.2001	0	0	2.4579	0.6956	0	0	2.0679	0	3.104	0.1328	-0.67567	2.4779	1.7412	-0.30945	2.8579	0.60018	1.0117	1.0093	2.4226	0	-0.55818	2.3921	-0.87623	-0.53089	2.3212	0.91533
254	-180	-180	-140	2.06788	116.36	33.5434	33.4391	106.204	0	0	0	1.1988	0	0	1.8015	1.361	0	-0.91817	-1.8529	0	2.663	1.3414	-0.66761	1.0771	2.1257	-0.28882	2.1653	1.5479	1.0131	-1.948	-1.5197	0	-0.56489	-2.3064	-0.91901	-0.56763	-2.3172	0.91471
255	-180	-180	-140	2.06788	243.64	33.0624	32.973	106.761	0	0	0	1.1925	0	0	2.0926	1.15	0	-0.91817	1.8529	0	2.9256	0.92582	-0.66635	1.5763	2.06	-0.30729	2.4861	1.2577	1.0136	-0.26561	2.7184	0	-1.517	1.7511	-0.89888	-1.4921	1.7362	0.91323
256	-180	-180	-140	2.44672	180	58.8431	81.9152	107.728	0	0	0	1.1724	0	0	1.9983	1.2688	0	-2.4467	0	0	2.844	1.1115	-0.66675	1.3926	2.123	-0.30554	2.3693	1.4017	1.0169	-3.2051	0.77539	0	-2.2156	-0.50003	-0.92786	-2.212	-0.49611	0.92903
257	-180	-180	-140	2.44672	90	50.2547	55.8141	114.313	0	0	0	1.1849	0	0	1.8908	1.3322	0	0	-2.4467	0	2.7472	1.2489	-0.66766	1.2226	2.1423	-0.29733	2.2581	1.4931	1.015	-0.99032	-2.885	0	0.55317	-2.4243	-0.92729	0.5557	-2.4281	0.92586
258	-180	-180	-140	2.44672	270	63.2328	67.8335	110.042	0	0	0	1.1707	0	0	2.2945	0.88488	0	0	2.4467	0	3.0555	0.47547	-0.66491	1.9594	1.8788	-0.31597	2.6896	0.91618	1.0176	0.73335	3.2493	0	-0.65828	2.4529	-0.86231	-0.51941	2.3387	0.94641
259	-180	-180	-140	2.44672	116.36	47.6651	52.8094	111.447	0	0	0	1.1792	0	0	1.9011	1.3203	0	-1.0864	-2.1923	0	2.7565	1.2273	-0.66723	1.2384	2.1343	-0.29854	2.268	1.4775	1.0155	-2.0819	-1.7723	0	-0.67731	-2.5613	-0.93055	-0.68093	-2.5706	0.92841
260	-180	-180	-140	2.44672	243.64	45.1343	47.324	109.608	0	0	0	1.1748	0	0	2.0525	1.1869	0	-1.0864	2.1923	0	2.8938	0.99318	-0.66428	1.4739	2.0626	-0.30209	2.4326	1.3061	1.0166	-0.4517	3.071	0	-1.6288	1.9825	-0.91268	-1.5945	1.9602	0.92687
261	-180	-180	-100	1.8	180	76.5034	76.4076	115.979	0	0	0	1.2245	0	0	1.9116	1.3715	0	-1.8	0	0	2.2186	1.5787	-1.0301	1.2353	2.1582	0.34951	2.8045	1.3056	0.62599	-2.2094	1.0072	0	-1.963	-0.56143	-0.90979	-1.9642	-0.56235	0.90912
262	-180	-180	-100	1.8	90	24.8428	24.7902	101.908	0	0	0	1.2395	0	0	1.8089	1.3706	0	0	-1.8	0	2.1036	1.6081	-1.0266	1.0873	2.1168	0.34551	2.7025	1.3711	0.6256	-1.0213	-2.185	0	0.54143	-2.0486	-0.90355	0.53809	-2.0431	0.90693
263	-180	-180	-100	1.8	270	64.0102	63.9988	115.224	0	0	0	1.2447	0	0	2.4642	0.77654	0	0	1.8	0	2.8084	0.77846	-1.0391	2.5094	1.7948	0.40475	3.1817	0.16478	0.55023	0.98346	2.2079	0	-0.54656	2.093	-0.89813	-0.56778	2.1404	0.86833
264	-180	-180	-100	1.8	116.36	15.8244	15.758	90.9301	0	0	0	1.2149	0	0	1.7826	1.3645	0	-0.79923	-1.6128	0	2.0759	1.5981	-1.027	1.0527	2.1025	0.34322	2.6738	1.363	0.62806	-1.8499	-1.3461	0	-0.47353	-2.1215	-0.90362	-0.47207	-2.1106	0.90905
265	-180	-180	-100	1.8	243.64	20.7779	20.7223	99.0196	0	0	0	1.2149	0	0	2.1123	1.1574	0	-0.79923	1.6128	0	2.4556	1.3043	-1.028	1.6767	2.0787	0.38568	2.9823	0.88168	0.59666	-0.12992	2.4643	0	-1.4035	1.5648	-0.90261	-1.4241	1.576	0.88892
266	-180	-180	-100	1.8	96.8508	17.8813	17.8223	96.3306	0	0	0	1.2301	0	0	1.8019	1.3663	0	-0.21471	-1.7871	0	2.0968	1.6023	-1.0266	1.0804	2.1124	0.34512	2.6946	1.3641	0.62628	-1.2792	-2.014	0	0.29307	-2.1065	-0.90309	0.29044	-2.0997	0.90684
267	-180	-180	-100	1.8	145.558	42.4954	42.4266	100.397	0	0	0	1.2105	0	0	1.7684	1.3721	0	-1.4845	-1.018	0	2.0576	1.6016	-1.0293	1.0217	2.094	0.34047	2.6598	1.3753	0.62869	-2.1672	-0.18254	0	-1.5085	-1.6247	-0.90217	-1.4952	-1.6089	0.91268
268	-180	-180	-100	1.8	214.442	35.051	34.9769	103.676	0	0	0	1.2065	0	0	1.97	1.2939	0	-1.4845	1.018	0	2.2934	1.486	-1.0263	1.3548	2.1273	0.35213	2.8527	1.1701	0.62744	-1.4062	2.1062	0	-1.9206	0.61264	-0.90578	-1.9327	0.61133	0.89929
269	-180	-180	-100	1.8	263.149	45.3072	45.2816	107.683	0	0	0	1.2328	0	0	2.3701	0.90256	0	-0.21471	1.7871	0	2.7209	0.94782	-1.0356	2.2855	1.9098	0.41336	3.1447	0.37062	0.55506	0.72025	2.3064	0	-0.79133	2.0025	-0.89958	-0.81344	2.0386	0.87575
270	-180	-180	-100	1.1	180	111.342	111.415	146.203	0	0	0	1.2243	0	0	1.85	1.3665	0	-1.1	0	0	2.153	1.5929	-1.0274	1.1691	2.1453	0.35719	2.7471	1.3238	0.61956	-1.7535	0.97601	0	-1.5866	-0.60447	-0.83276	-1.5758	-0.59501	0.84127
271	-180	-180	-100	1.1	90	141.061	141.176	214.017	0	0	0	1.3483	0	0	1.9456	1.3419	0	0	-1.1	0	2.2542	1.591	-1.0243	1.2516	2.1091	0.3514	2.8477	1.3223	0.61704	-1.0635	-1.529	0	0.3852	-1.6887	-0.86062	0.37643	-1.6852	0.86664
272	-180	-180	-100	1.1	270	175.757	175.857	225.928	0	0	0	1.4078	0	0	2.4423	0.99102	0	0	1.1	0	2.8023	1.0833	-1.0345	2.2661	2.0047	0.39571	3.2567	0.52774	0.56122	0.72347	1.9196	0	-0.72363	1.4968	-0.81973	-0.77957	1.5157	0.76496
273	-180	-180	-100	1.1	116.36	88.7939	88.9159	154.442	0	0	0	1.2635	0	0	1.8444	1.3366	0	-0.48842	-0.98562	0	2.1496	1.5859	-1.0238	1.1349	2.0929	0.34804	2.7432	1.3298	0.62045	-1.5999	-0.99628	0	-0.22777	-1.6742	-0.84573	-0.23753	-1.6616	0.85721
274	-180	-180	-100	1.1	243.64	101.058	101.198	179.02	0	0	0	1.2838	0	0	2.1234	1.2125	0	-0.48842	0.98562	0	2.4605	1.3803	-1.0296	1.752	2.1562	0.40925	3.0093	0.91927	0.56512	0.055304	1.9477	0	-1.2262	1.107	-0.84119	-1.2603	1.1038	0.81034
275	-180	-180	-100	1.1	96.8508	118.869	119.03	193.993	0	0	0	1.3161	0	0	1.9066	1.3392	0	-0.13121	-1.0921	0	2.2143	1.5897	-1.0238	1.2076	2.1034	0.35012	2.8077	1.3255	0.61814	-1.2111	-1.4207	0	0.24378	-1.6984	-0.85391	0.23241	-1.6921	0.86275
276	-180	-180	-100	1.1	145.558	96.0677	96.1609	140.938	0	0	0	1.234	0	0	1.8215	1.3429	0	-0.90717	-0.62212	0	2.1236	1.5821	-1.0261	1.1101	2.0978	0.34861	2.7197	1.3285	0.62058	-1.9282	-0.14595	0	-0.97686	-1.3939	-0.83587	-0.97583	-1.367	0.85496
277	-180	-180	-100	1.1	214.442	95.8345	95.941	151.267	0	0	0	1.2381	0	0	1.9014	1.3531	0	-0.90717	0.62212	0	2.2124	1.5767	-1.0253	1.2871	2.1772	0.37118	2.7999	1.2576	0.60927	-0.86293	1.7792	0	-1.6044	0.40211	-0.84835	-1.6223	0.38782	0.82922
278	-180	-180	-100	1.1	263.149	147.675	147.83	210.208	0	0	0	1.3612	0	0	2.3485	1.0535	0	-0.13121	1.0921	0	2.7018	1.1638	-1.034	2.1364	2.0539	0.40429	3.1856	0.62668	0.55618	0.56962	1.9263	0	-0.85323	1.4225	-0.82839	-0.90343	1.4349	0.77956
279	-180	-180	-100	2.5	180	57.6608	81.6317	106.107	0	0	0	1.1719	0	0	1.996	1.2709	0	-2.5	0	0	2.3197	1.437	-1.0279	1.3974	2.1127	0.3512	2.8644	1.1035	0.63368	-3.2847	0.74824	0	-2.2345	-0.47849	-0.92971	-2.2384	-0.48304	0.92851
280	-180	-180	-100	2.5	90	50.6583	57.9503	112.964	0	0	0	1.1821	0	0	1.9029	1.3268	0	0	-2.5	0	2.2133	1.5185	-1.0282	1.2518	2.1298	0.35041	2.7839	1.2242	0.63087	-0.98903	-2.9403	0	0.55265	-2.46	-0.92682	0.55009	-2.4562	0.92818
281	-180	-180	-100	2.5	270	62.041	67.573	108.573	0	0	0	1.1701	0	0	2.279	0.90904	0	0	2.5	0	2.6481	0.97784	-1.0255	1.9261	1.8875	0.34718	3.064	0.49901	0.63566	0.71775	3.3164	0	-0.49932	2.3532	-0.95125	-0.66056	2.4814	0.85963
282	-180	-180	-100	2.5	116.36	48.3502	55.1076	110.495	0	0	0	1.1775	0	0	1.9127	1.3159	0	-1.11	-2.24	0	2.2252	1.5037	-1.0281	1.2661	2.123	0.34932	2.7914	1.205	0.63238	-2.0996	-1.8068	0	-0.69624	-2.6049	-0.92979	-0.69228	-2.5952	0.93178
283	-180	-180	-100	2.5	243.64	45.9226	49.2189	108.921	0	0	0	1.1737	0	0	2.0457	1.1964	0	-1.11	2.24	0	2.3819	1.3501	-1.0271	1.4688	2.0579	0.34341	2.9075	0.99694	0.63501	-0.47339	3.1171	0	-1.6046	1.9895	-0.929	-1.6428	2.0149	0.91427
284	-180	-180	-100	2.5	96.8508	48.9837	55.6234	111.705	0	0	0	1.1812	0	0	1.9035	1.3248	0	-0.29821	-2.4822	0	2.2143	1.5161	-1.0281	1.2525	2.128	0.35	2.7841	1.2214	0.63134	-1.3623	-2.6763	0	0.24871	-2.5644	-0.92819	0.24713	-2.5586	0.9296
285	-180	-180	-100	2.5	145.558	53.8205	67.7871	109.254	0	0	0	1.1732	0	0	1.9444	1.2976	0	-2.0618	-1.4139	0	2.2613	1.4759	-1.0282	1.3147	2.1175	0.34953	2.819	1.1644	0.63343	-2.5256	-0.44043	0	-1.9396	-1.9479	-0.93196	-1.9202	-1.9379	0.9348
286	-180	-180	-100	2.5	214.442	50.5762	59.1734	109.631	0	0	0	1.1737	0	0	1.9928	1.2654	0	-2.0618	1.4139	0	2.3177	1.4339	-1.0276	1.387	2.1041	0.34809	2.8621	1.1042	0.6345	-1.9794	2.4938	0	-2.2792	0.908	-0.92925	-2.2961	0.90873	0.92561
287	-180	-180	-100	2.5	263.149	54.6919	58.5465	108.719	0	0	0	1.171	0	0	2.2054	1.0087	0	-0.29821	2.4822	0	2.5663	1.1079	-1.026	1.7676	1.9501	0.34521	3.0234	0.66967	0.63521	0.42469	3.292	0	-0.82191	2.3418	-0.93857	-0.9248	2.4256	0.88265
288	-180	-180	-100	1.30503	180	51.3697	51.3965	88.9783	0	0	0	1.2209	0	0	1.8639	1.3711	0	-1.305	0	0	2.1653	1.5859	-1.0302	1.1802	2.1497	0.3524	2.7609	1.3225	0.62015	-1.8501	0.98189	0	-1.6987	-0.56783	-0.86377	-1.6902	-0.56146	0.87052
289	-180	-180	-100	1.30503	90	43.6214	43.698	120.686	0	0	0	1.292	0	0	1.8852	1.3483	0	0	-1.305	0	2.1884	1.588	-1.0261	1.182	2.1102	0.34682	2.7846	1.3346	0.61907	-1.0426	-1.7044	0	0.4401	-1.7835	-0.87874	0.4378	-1.781	0.88087
290	-180	-180	-100	1.30503	270	87.1677	87.2513	137.319	0	0	0	1.3339	0	0	2.4585	0.8952	0	0	1.305	0	2.8036	0.93532	-1.0409	2.3873	1.9274	0.38144	3.2354	0.36654	0.55548	0.82995	1.9902	0	-0.62378	1.6695	-0.85545	-0.66485	1.6954	0.81325
291	-180	-180	-100	1.30503	116.36	9.92702	9.992	81.943	0	0	0	1.2415	0	0	1.8143	1.3448	0	-0.57945	-1.1693	0	2.1139	1.5866	-1.0257	1.0929	2.0914	0.3439	2.7109	1.3439	0.62237	-1.6698	-1.0811	0	-0.30202	-1.7864	-0.87006	-0.30537	-1.7765	0.87736
292	-180	-180	-100	1.30503	243.64	22.6525	22.7323	102.762	0	0	0	1.2566	0	0	2.1298	1.1927	0	-0.57945	1.1693	0	2.4664	1.3447	-1.0311	1.7667	2.1404	0.40404	3.009	0.88829	0.56895	0.028583	2.0749	0	-1.2569	1.2431	-0.86696	-1.2802	1.2454	0.84786
293	-180	-180	-100	1.30503	96.8508	26.9252	26.9982	106.735	0	0	0	1.2735	0	0	1.8605	1.345	0	-0.15567	-1.2957	0	2.1632	1.5865	-1.0256	1.1534	2.104	0.34618	2.7591	1.3354	0.6201	-1.2248	-1.579	0	0.26415	-1.8033	-0.87474	0.26051	-1.7991	0.87843
294	-180	-180	-100	1.30503	145.558	29.7273	29.7631	78.4979	0	0	0	1.2258	0	0	1.8007	1.3536	0	-1.0763	-0.73808	0	2.0964	1.586	-1.0287	1.0715	2.0933	0.34299	2.6981	1.3485	0.62169	-1.9982	-0.14326	0	-1.1323	-1.4351	-0.86197	-1.127	-1.4124	0.87866
295	-180	-180	-100	1.30503	214.442	28.0194	28.0539	89.1272	0	0	0	1.2274	0	0	1.92	1.3444	0	-1.0763	0.73808	0	2.233	1.5568	-1.0265	1.3046	2.1717	0.36523	2.8148	1.2454	0.61451	-0.9986	1.8549	0	-1.6869	0.46475	-0.87146	-1.6976	0.45775	0.86139
296	-180	-180	-100	1.30503	263.149	61.1502	61.2383	124.839	0	0	0	1.3059	0	0	2.3641	0.99334	0	-0.15567	1.2957	0	2.7082	1.0652	-1.0387	2.2277	2.0079	0.39692	3.1755	0.51587	0.55123	0.64285	2.0151	0	-0.79902	1.5927	-0.85798	-0.83267	1.6109	0.82553
297	-180	-180	-100	2.29497	180	63.419	83.0927	112.419	0	0	0	1.1739	0	0	2.0044	1.268	0	-2.295	0	0	2.3292	1.4331	-1.0278	1.4104	2.1129	0.35157	2.8722	1.0968	0.6336	-3.0171	0.81144	0	-2.1319	-0.53053	-0.92626	-2.1355	-0.53439	0.92471
298	-180	-180	-100	2.29497	90	48.1852	49.5378	115.956	0	0	0	1.1949	0	0	1.8486	1.3556	0	0	-2.295	0	2.1507	1.5647	-1.028	1.1647	2.1324	0.34905	2.7351	1.2957	0.62973	-0.99314	-2.73	0	0.56372	-2.3366	-0.92084	0.56025	-2.3311	0.92317
299	-180	-180	-100	2.29497	270	66.5673	68.9457	113.169	0	0	0	1.1767	0	0	2.3557	0.80988	0	0	2.295	0	2.7249	0.84367	-1.0274	2.1658	1.8093	0.38719	3.1023	0.29418	0.60528	0.86183	2.9512	0	-0.55163	2.327	-0.93538	-0.64142	2.4353	0.8655
300	-180	-180	-100	2.29497	116.36	44.6884	45.9314	111.953	0	0	0	1.1853	0	0	1.8578	1.3414	0	-1.019	-2.0563	0	2.1624	1.5448	-1.028	1.1781	2.1224	0.3474	2.7415	1.2702	0.63181	-2.0302	-1.6736	0	-0.63845	-2.4742	-0.92308	-0.63474	-2.4631	0.92648
301	-180	-180	-100	2.29497	243.64	41.8473	41.9181	109.826	0	0	0	1.1793	0	0	2.0663	1.1686	0	-1.019	2.0563	0	2.4075	1.3189	-1.0264	1.5089	2.0418	0.34638	2.9262	0.95413	0.63313	-0.37672	2.93	0	-1.5594	1.8789	-0.92209	-1.5939	1.9009	0.90501
302	-180	-180	-100	2.29497	96.8508	45.3247	46.3615	113.603	0	0	0	1.1924	0	0	1.8493	1.352	0	-0.27376	-2.2786	0	2.1519	1.5601	-1.028	1.1656	2.1292	0.34849	2.735	1.2902	0.63038	-1.3349	-2.4951	0	0.27044	-2.4344	-0.92146	0.26822	-2.427	0.92395
303	-180	-180	-100	2.29497	145.558	55.3648	62.4221	113.958	0	0	0	1.1778	0	0	1.9007	1.3192	0	-1.8927	-1.298	0	2.2116	1.5092	-1.0283	1.2429	2.1181	0.34753	2.7801	1.2176	0.6332	-2.404	-0.34832	0	-1.838	-1.8561	-0.92562	-1.8185	-1.8443	0.93121
304	-180	-180	-100	2.29497	214.442	50.0787	53.1459	113.192	0	0	0	1.1782	0	0	1.9956	1.2618	0	-1.8927	1.298	0	2.3219	1.4325	-1.0271	1.3894	2.1014	0.34716	2.8658	1.1035	0.63457	-1.8288	2.3807	0	-2.1751	0.81323	-0.92412	-2.1914	0.81338	0.9191
305	-180	-180	-100	2.29497	263.149	55.6023	56.2712	111.843	0	0	0	1.1773	0	0	2.2649	0.93545	0	-0.27376	2.2786	0	2.631	1.0116	-1.0264	1.9328	1.9035	0.37274	3.0628	0.52226	0.61727	0.54249	2.9908	0	-0.83793	2.2802	-0.92793	-0.909	2.3539	0.87749
306	-180	-180	-100	1.15328	180	85.4277	85.4863	121.19	0	0	0	1.2224	0	0	1.8545	1.3679	0	-1.1533	0	0	2.1569	1.59	-1.0284	1.1734	2.1472	0.35568	2.7516	1.3225	0.61963	-1.7765	0.97557	0	-1.6132	-0.59089	-0.84243	-1.6022	-0.58146	0.85161
307	-180	-180	-100	1.15328	90	103.989	104.091	178.353	0	0	0	1.3277	0	0	1.926	1.3432	0	0	-1.1533	0	2.233	1.5881	-1.0251	1.2302	2.1097	0.34974	2.8273	1.324	0.61736	-1.0564	-1.5724	0	0.39679	-1.7105	-0.86784	0.39323	-1.7087	0.87007
308	-180	-180	-100	1.15328	270	142.076	142.169	191.972	0	0	0	1.3812	0	0	2.4477	0.95723	0	0	1.1533	0	2.8028	1.0302	-1.0371	2.3044	1.9792	0.38813	3.2501	0.47249	0.55981	0.75554	1.9367	0	-0.685	1.5411	-0.83463	-0.74068	1.5631	0.77881
309	-180	-180	-100	1.15328	116.36	56.7411	56.8341	124.65	0	0	0	1.2558	0	0	1.8351	1.3385	0	-0.51208	-1.0334	0	2.1387	1.585	-1.0244	1.1222	2.0922	0.34654	2.7333	1.3331	0.62097	-1.617	-1.0166	0	-0.24779	-1.6999	-0.85355	-0.25497	-1.6887	0.8631
310	-180	-180	-100	1.15328	243.64	69.4194	69.5316	148.305	0	0	0	1.2747	0	0	2.126	1.2065	0	-0.51208	1.0334	0	2.4626	1.3684	-1.0303	1.7601	2.1527	0.40753	3.0096	0.9081	0.56569	0.051185	1.9785	0	-1.23	1.1424	-0.84918	-1.2606	1.1408	0.82234
311	-180	-180	-100	1.53212	180	52.9727	52.9395	91.5959	0	0	0	1.2234	0	0	1.8746	1.3745	0	-1.5321	0	0	2.1759	1.586	-1.031	1.1864	2.1507	0.34965	2.771	1.3254	0.62186	-1.979	1.002	0	-1.8343	-0.55541	-0.88804	-1.83	-0.55288	0.89085
312	-180	-180	-100	1.53212	90	18.7303	18.7428	97.1104	0	0	0	1.2635	0	0	1.842	1.3586	0	0	-1.5321	0	2.1405	1.5977	-1.0264	1.1271	2.1113	0.34524	2.7387	1.3556	0.62219	-1.0319	-1.915	0	0.49629	-1.9026	-0.89127	0.49366	-1.8985	0.89419
313	-180	-180	-100	1.53212	270	63.3694	63.4021	114.306	0	0	0	1.2918	0	0	2.4658	0.84162	0	0	1.5321	0	2.8053	0.85892	-1.042	2.4659	1.8725	0.38787	3.2152	0.2696	0.5503	0.91455	2.081	0	-0.57944	1.8618	-0.87578	-0.60407	1.8926	0.84711
314	-180	-180	-100	1.53212	116.36	0.14819	0.147479	74.8856	0	0	0	1.2291	0	0	1.7923	1.3554	0	-0.68029	-1.3728	0	2.0876	1.5942	-1.0265	1.0621	2.0939	0.3426	2.6866	1.3596	0.62481	-1.7524	-1.1933	0	-0.38101	-1.9342	-0.88798	-0.38159	-1.9242	0.89414
315	-180	-180	-100	1.53212	243.64	10.4575	10.4612	90.5213	0	0	0	1.238	0	0	2.1265	1.1751	0	-0.68029	1.3728	0	2.4657	1.3226	-1.0301	1.7426	2.1152	0.39877	3.0019	0.87758	0.57828	-0.028835	2.2397	0	-1.3185	1.3921	-0.88638	-1.3375	1.3987	0.8721
316	-180	-180	-100	2.06788	180	73.5051	85.2301	122.228	0	0	0	1.1804	0	0	2.015	1.2712	0	-2.0679	0	0	2.3407	1.4371	-1.0277	1.4243	2.1184	0.35232	2.8834	1.0988	0.63305	-2.7855	0.82144	0	-1.9913	-0.56285	-0.91969	-1.9947	-0.56708	0.91743
317	-180	-180	-100	2.06788	90	38.737	38.6408	111.859	0	0	0	1.2157	0	0	1.8052	1.3745	0	0	-2.0679	0	2.1	1.6023	-1.0274	1.0914	2.1264	0.34704	2.6956	1.3576	0.62828	-1.0041	-2.4838	0	0.5641	-2.2008	-0.91275	0.56018	-2.1945	0.916
318	-180	-180	-100	2.06788	270	67.6381	67.5803	116.107	0	0	0	1.2004	0	0	2.4466	0.71848	0	0	2.0679	0	2.8032	0.71381	-1.0332	2.468	1.7248	0.41777	3.1414	0.093233	0.56379	1.0103	2.4202	0	-0.52773	2.3149	-0.91892	-0.56062	2.4013	0.87134
319	-180	-180	-100	2.06788	116.36	33.6634	33.5586	105.886	0	0	0	1.1986	0	0	1.8006	1.363	0	-0.91817	-1.8529	0	2.0966	1.5847	-1.0277	1.0858	2.1139	0.34494	2.6885	1.3368	0.63074	-1.948	-1.5198	0	-0.56761	-2.3176	-0.9145	-0.56462	-2.3058	0.91922
320	-180	-180	-100	2.06788	243.64	33.0648	32.9752	106.509	0	0	0	1.1926	0	0	2.0891	1.1541	0	-0.91817	1.8529	0	2.4333	1.3021	-1.0265	1.5832	2.0492	0.36328	2.9524	0.91182	0.61931	-0.26134	2.7152	0	-1.4909	1.7368	-0.91408	-1.5184	1.7536	0.89819
321	-180	-180	-100	2.44672	180	58.8925	81.9608	107.477	0	0	0	1.1723	0	0	1.9978	1.2702	0	-2.4467	0	0	2.3218	1.436	-1.0279	1.4004	2.1127	0.35128	2.8661	1.1019	0.63368	-3.2044	0.77605	0	-2.2123	-0.49615	-0.92907	-2.2161	-0.50035	0.92782
322	-180	-180	-100	2.44672	90	50.3339	55.9056	114.023	0	0	0	1.1847	0	0	1.8904	1.3337	0	0	-2.4467	0	2.199	1.5293	-1.0282	1.2319	2.131	0.35014	2.7728	1.2406	0.63057	-0.99	-2.8857	0	0.5558	-2.4279	-0.92579	0.55303	-2.4237	0.92736
323	-180	-180	-100	2.44672	270	63.2195	68.0399	109.752	0	0	0	1.1711	0	0	2.2963	0.886	0	0	2.4467	0	2.6661	0.94695	-1.0258	1.9777	1.8704	0.3559	3.0737	0.45253	0.62969	0.74677	3.2364	0	-0.51737	2.34	-0.94757	-0.65952	2.4616	0.86117
324	-180	-180	-100	2.44672	116.36	47.7408	52.8963	111.154	0	0	0	1.1791	0	0	1.9007	1.3218	0	-1.0864	-2.1923	0	2.2116	1.5129	-1.0281	1.247	2.1233	0.34892	2.7807	1.2194	0.63223	-2.082	-1.7725	0	-0.68094	-2.5709	-0.92832	-0.67703	-2.5608	0.93064
325	-180	-180	-100	2.44672	243.64	45.1816	47.3836	109.402	0	0	0	1.1747	0	0	2.0513	1.189	0	-1.0864	2.1923	0	2.3888	1.3417	-1.0269	1.4791	2.0535	0.34392	2.9124	0.98553	0.63471	-0.44781	3.0682	0	-1.5936	1.9606	-0.92747	-1.6308	1.985	0.9121
326	-180	-180	-20	1.8	180	76.4889	76.3933	115.987	0	0	0	1.2245	0	0	1.9126	1.3706	0	-1.8	0	0	1.2388	2.16	-0.34807	2.2409	1.5708	1.0247	2.7974	1.3011	-0.63774	-2.2094	1.0072	0	-1.9643	-0.56238	-0.90908	-1.9629	-0.5614	0.90983
327	-180	-180	-20	1.8	90	24.8047	24.7523	101.985	0	0	0	1.2396	0	0	1.8096	1.37	0	0	-1.8	0	1.0922	2.1195	-0.34588	2.1386	1.5981	1.0178	2.6919	1.3646	-0.64293	-1.0213	-2.1851	0	0.53827	-2.0435	-0.90673	0.54127	-2.0482	0.90374
328	-180	-180	-20	1.8	270	64.2126	64.1962	115.541	0	0	0	1.2446	0	0	2.472	0.76103	0	0	1.8	0	2.5191	1.8111	-0.3158	2.8344	0.70296	1.0317	3.1682	0.18018	-0.60683	0.98433	2.2057	0	-0.56552	2.1373	-0.87085	-0.54733	2.0967	0.89644
329	-180	-180	-20	1.8	116.36	15.7954	15.7293	90.9704	0	0	0	1.215	0	0	1.783	1.364	0	-0.79923	-1.6128	0	1.0582	2.1046	-0.34718	2.1066	1.59	1.0192	2.6652	1.3565	-0.64202	-1.8499	-1.3461	0	-0.47224	-2.1112	-0.9088	-0.47347	-2.121	0.90387
330	-180	-180	-20	1.8	243.64	20.8242	20.7674	99.2273	0	0	0	1.2148	0	0	2.1166	1.153	0	-0.79923	1.6128	0	1.6718	2.0888	-0.33735	2.4876	1.2711	1.0221	2.9669	0.89222	-0.63039	-0.1323	2.4661	0	-1.4235	1.5748	-0.88931	-1.4042	1.5645	0.90208
331	-180	-180	-20	1.8	96.8508	17.8452	17.7861	96.3868	0	0	0	1.2302	0	0	1.8025	1.3658	0	-0.21471	-1.7871	0	1.0852	2.115	-0.34615	2.1307	1.5927	1.018	2.6845	1.3578	-0.64283	-1.2792	-2.014	0	0.29054	-2.1001	-0.90663	0.29295	-2.1062	0.90329
332	-180	-180	-20	1.8	145.558	42.4801	42.4115	100.405	0	0	0	1.2106	0	0	1.7687	1.3717	0	-1.4845	-1.018	0	1.0282	2.0955	-0.34893	2.0823	1.5963	1.0228	2.6544	1.3681	-0.63823	-2.1671	-0.18251	0	-1.4958	-1.6094	-0.91232	-1.508	-1.6242	0.90253
333	-180	-180	-20	1.8	214.442	35.0299	34.9561	103.724	0	0	0	1.2066	0	0	1.9707	1.2932	0	-1.4845	1.018	0	1.3571	2.1296	-0.34715	2.3186	1.4741	1.02	2.8432	1.1681	-0.64215	-1.4059	2.1062	0	-1.9325	0.61141	-0.89939	-1.9208	0.6127	0.9057
334	-180	-180	-20	1.8	263.149	45.549	45.5177	108.017	0	0	0	1.2327	0	0	2.3799	0.88776	0	-0.21471	1.7871	0	2.2923	1.9288	-0.31918	2.7533	0.87426	1.029	3.1301	0.38652	-0.61257	0.72021	2.3061	0	-0.81172	2.036	-0.87754	-0.79238	2.0049	0.89829
335	-180	-180	-20	1.1	180	111.317	111.391	146.249	0	0	0	1.2243	0	0	1.8509	1.3657	0	-1.1	0	0	1.1685	2.1487	-0.34459	2.1834	1.5808	1.0205	2.7348	1.3232	-0.63911	-1.7535	0.97608	0	-1.5763	-0.59548	-0.84079	-1.586	-0.60392	0.83326
336	-180	-180	-20	1.1	90	141.025	141.14	214.073	0	0	0	1.3484	0	0	1.9462	1.3412	0	0	-1.1	0	1.2534	2.1122	-0.34458	2.2887	1.5789	1.0158	2.8355	1.3192	-0.63673	-1.0634	-1.5291	0	0.37583	-1.6849	-0.86712	0.38598	-1.6888	0.86012
337	-180	-180	-20	1.1	270	175.947	176.053	226.211	0	0	0	1.4062	0	0	2.4504	0.97872	0	0	1.1	0	2.2645	2.0177	-0.3222	2.8157	1.0396	1.0356	3.2521	0.5395	-0.59579	0.72475	1.919	0	-0.77892	1.5149	-0.76489	-0.72114	1.4979	0.82128
338	-180	-180	-20	1.1	116.36	88.7634	88.8857	154.48	0	0	0	1.2636	0	0	1.845	1.336	0	-0.48842	-0.98562	0	1.1383	2.0954	-0.34614	2.1806	1.5759	1.0161	2.7334	1.3254	-0.63661	-1.5999	-0.99633	0	-0.23745	-1.6619	-0.85704	-0.22771	-1.674	0.84589
339	-180	-180	-20	1.1	243.64	101.254	101.394	179.261	0	0	0	1.284	0	0	2.1333	1.2044	0	-0.48842	0.98562	0	1.7454	2.176	-0.31916	2.512	1.3194	1.0225	2.987	0.93872	-0.62421	0.054325	1.9479	0	-1.2591	1.1033	-0.81149	-1.2271	1.1072	0.84035
340	-180	-180	-20	1.1	96.8508	118.833	118.994	194.027	0	0	0	1.3162	0	0	1.9072	1.3386	0	-0.13121	-1.0921	0	1.21	2.1063	-0.34497	2.2483	1.5781	1.0154	2.7961	1.3219	-0.63697	-1.211	-1.4208	0	0.23218	-1.692	-0.86294	0.24419	-1.6984	0.8537
341	-180	-180	-20	1.1	145.558	96.0456	96.139	140.962	0	0	0	1.2341	0	0	1.8222	1.3424	0	-0.90717	-0.62212	0	1.1132	2.0999	-0.34701	2.1502	1.5736	1.0196	2.7114	1.3247	-0.63443	-1.9282	-0.14597	0	-0.97592	-1.3678	-0.85443	-0.97671	-1.3932	0.83638
342	-180	-180	-20	1.1	214.442	95.813	95.922	151.383	0	0	0	1.2382	0	0	1.9032	1.3518	0	-0.90717	0.62212	0	1.2812	2.1846	-0.33692	2.2557	1.5526	1.0163	2.7793	1.2638	-0.64295	-0.86314	1.7791	0	-1.6217	0.38837	-0.82994	-1.605	0.40158	0.84773
343	-180	-180	-20	1.1	263.149	147.909	148.068	210.556	0	0	0	1.3605	0	0	2.3583	1.0416	0	-0.13121	1.0921	0	2.1346	2.0713	-0.31806	2.7298	1.1069	1.032	3.1748	0.643	-0.60392	0.57037	1.9258	0	-0.90247	1.4339	-0.78033	-0.85244	1.4237	0.82864
344	-180	-180	-20	2.5	180	57.6506	81.6287	106.12	0	0	0	1.172	0	0	1.9962	1.2705	0	-2.5	0	0	1.3992	2.114	-0.34937	2.3363	1.4287	1.0237	2.858	1.1022	-0.64303	-3.2846	0.74831	0	-2.2384	-0.48304	-0.92851	-2.2346	-0.47851	0.92971
345	-180	-180	-20	2.5	90	50.6399	57.9277	113.015	0	0	0	1.1822	0	0	1.9031	1.3265	0	0	-2.5	0	1.2536	2.1317	-0.34765	2.2363	1.5091	1.0225	2.7753	1.2222	-0.64362	-0.98915	-2.94	0	0.55021	-2.4566	-0.92813	0.55256	-2.4599	0.92687
346	-180	-180	-20	2.5	270	62.0417	67.6376	108.505	0	0	0	1.1703	0	0	2.2798	0.90883	0	0	2.5	0	1.9313	1.8855	-0.35537	2.6444	0.98274	1.0267	3.0674	0.49378	-0.62917	0.72129	3.3132	0	-0.65994	2.483	-0.86013	-0.49999	2.3546	0.95109
347	-180	-180	-20	2.5	116.36	48.3345	55.0899	110.548	0	0	0	1.1775	0	0	1.9129	1.3156	0	-1.11	-2.24	0	1.2685	2.1245	-0.34839	2.2463	1.495	1.0228	2.7839	1.2026	-0.64352	-2.0996	-1.8067	0	-0.69246	-2.5956	-0.93172	-0.69618	-2.6047	0.92985
348	-180	-180	-20	2.5	243.64	45.9247	49.2392	108.9	0	0	0	1.1738	0	0	2.0459	1.1965	0	-1.11	2.24	0	1.4738	2.0571	-0.35278	2.3889	1.3479	1.0249	2.9067	0.99243	-0.63543	-0.4712	3.1154	0	-1.6435	2.0159	-0.91413	-1.6043	1.9899	0.92921
349	-180	-180	-20	2.5	96.8508	48.9658	55.6028	111.779	0	0	0	1.1812	0	0	1.9038	1.3244	0	-0.29821	-2.4822	0	1.2545	2.1298	-0.34783	2.2369	1.5068	1.0225	2.7758	1.2193	-0.64368	-1.3623	-2.6761	0	0.24717	-2.559	-0.92954	0.24863	-2.5643	0.92824
350	-180	-180	-20	2.5	145.558	53.8083	67.7751	109.288	0	0	0	1.1732	0	0	1.9446	1.2973	0	-2.0618	-1.4139	0	1.317	2.1187	-0.34914	2.2797	1.4679	1.0235	2.8124	1.1622	-0.64309	-2.5256	-0.44041	0	-1.9207	-1.9382	-0.93475	-1.9392	-1.9477	0.93202
351	-180	-180	-20	2.5	214.442	50.569	59.1754	109.647	0	0	0	1.1738	0	0	1.9931	1.265	0	-2.0618	1.4139	0	1.3902	2.1046	-0.35031	2.3322	1.4272	1.0238	2.8575	1.1014	-0.64128	-1.9788	2.4938	0	-2.2962	0.90881	-0.9256	-2.2794	0.90809	0.92927
352	-180	-180	-20	2.5	263.149	54.695	58.5899	108.653	0	0	0	1.1711	0	0	2.2057	1.009	0	-0.29821	2.4822	0	1.7723	1.9484	-0.35493	2.5642	1.1115	1.0264	3.026	0.66514	-0.6299	0.42779	3.2891	0	-0.92536	2.4276	-0.88236	-0.82139	2.3422	0.9389
353	-180	-180	-20	1.30503	180	51.3482	51.3751	89.0029	0	0	0	1.221	0	0	1.8649	1.3702	0	-1.305	0	0	1.1821	2.1523	-0.346	2.1928	1.5759	1.0237	2.7511	1.3194	-0.63617	-1.8501	0.98193	0	-1.6907	-0.56178	-0.87016	-1.6983	-0.56749	0.86413
354	-180	-180	-20	1.30503	90	43.5851	43.662	120.742	0	0	0	1.292	0	0	1.886	1.3476	0	0	-1.305	0	1.1862	2.1129	-0.34539	2.2228	1.5772	1.0175	2.7739	1.329	-0.63688	-1.0425	-1.7045	0	0.43785	-1.7811	-0.88082	0.44021	-1.7833	0.87879
355	-180	-180	-20	1.30503	270	87.2826	87.3688	137.527	0	0	0	1.3334	0	0	2.4645	0.88474	0	0	1.305	0	2.3902	1.9387	-0.31883	2.8251	0.88576	1.0367	3.2259	0.37699	-0.59418	0.83097	1.9893	0	-0.66341	1.6945	-0.81461	-0.62401	1.6708	0.85467
356	-180	-180	-20	1.30503	116.36	9.89917	9.96441	81.9843	0	0	0	1.2416	0	0	1.8149	1.3443	0	-0.57945	-1.1693	0	1.0982	2.0936	-0.34694	2.1442	1.5781	1.018	2.7026	1.3377	-0.63651	-1.6698	-1.0812	0	-0.30534	-1.7769	-0.87712	-0.30196	-1.786	0.8703
357	-180	-180	-20	1.30503	243.64	22.7953	22.8799	103.066	0	0	0	1.2568	0	0	2.1386	1.185	0	-0.57945	1.1693	0	1.7627	2.159	-0.32139	2.5188	1.285	1.0224	2.9861	0.90501	-0.62618	0.027583	2.0753	0	-1.2793	1.245	-0.84866	-1.2579	1.2434	0.8662
358	-180	-180	-20	1.30503	96.8508	26.8898	26.9631	106.792	0	0	0	1.2735	0	0	1.8612	1.3444	0	-0.15567	-1.2957	0	1.1579	2.1066	-0.34568	2.197	1.5761	1.017	2.7487	1.3297	-0.63724	-1.2248	-1.579	0	0.26058	-1.7993	-0.87832	0.26422	-1.803	0.87484
359	-180	-180	-20	1.30503	145.558	29.7108	29.7467	78.5045	0	0	0	1.2259	0	0	1.8012	1.3531	0	-1.0763	-0.73808	0	1.077	2.0948	-0.3482	2.1209	1.5798	1.0224	2.6921	1.3423	-0.63227	-1.9982	-0.14328	0	-1.1272	-1.4131	-0.87817	-1.132	-1.4345	0.86247
360	-180	-180	-20	1.30503	214.442	27.9857	28.0215	89.2549	0	0	0	1.2275	0	0	1.9214	1.3431	0	-1.0763	0.73808	0	1.3018	2.1778	-0.33982	2.2738	1.5357	1.0174	2.7964	1.2483	-0.644	-0.99859	1.8549	0	-1.6973	0.45806	-0.86171	-1.6872	0.46453	0.87118
361	-180	-180	-20	1.30503	263.149	61.3298	61.4209	125.18	0	0	0	1.3056	0	0	2.3729	0.98152	0	-0.15567	1.2957	0	2.2315	2.0249	-0.31437	2.744	0.99899	1.032	3.1604	0.53058	-0.60494	0.64407	2.0137	0	-0.83112	1.6102	-0.82691	-0.79935	1.5942	0.85718
362	-180	-180	-20	2.29497	180	63.4088	83.0866	112.432	0	0	0	1.174	0	0	2.0047	1.2676	0	-2.295	0	0	1.4121	2.1142	-0.34931	2.3459	1.4246	1.0236	2.8658	1.0956	-0.64314	-3.0171	0.8115	0	-2.1355	-0.53437	-0.92472	-2.132	-0.53056	0.92625
363	-180	-180	-20	2.29497	90	48.1596	49.5097	116	0	0	0	1.195	0	0	1.8489	1.3552	0	0	-2.295	0	1.1672	2.1346	-0.34675	2.1783	1.5549	1.0212	2.7253	1.2924	-0.64448	-0.99322	-2.7298	0	0.56041	-2.3316	-0.92306	0.56356	-2.3364	0.92094
364	-180	-180	-20	2.29497	270	66.6263	68.9581	113.343	0	0	0	1.1762	0	0	2.3541	0.80868	0	0	2.295	0	2.1462	1.8201	-0.34632	2.7233	0.83411	1.0281	3.0985	0.31335	-0.62319	0.84761	2.9706	0	-0.64225	2.4239	-0.86673	-0.55472	2.3232	0.93381
365	-180	-180	-20	2.29497	116.36	44.6683	45.9095	112.002	0	0	0	1.1854	0	0	1.858	1.3411	0	-1.019	-2.0563	0	1.1814	2.124	-0.3479	2.1867	1.5362	1.0219	2.7334	1.2666	-0.64396	-2.0302	-1.6735	0	-0.63496	-2.4636	-0.92636	-0.63838	-2.4739	0.9232
366	-180	-180	-20	2.29497	243.64	41.8472	41.9208	109.803	0	0	0	1.1794	0	0	2.0664	1.1687	0	-1.019	2.0563	0	1.5126	2.0414	-0.3526	2.4146	1.3161	1.0244	2.9248	0.95102	-0.63471	-0.37523	2.9288	0	-1.5942	1.9016	-0.90493	-1.5592	1.8793	0.92224
367	-180	-180	-20	2.29497	96.8508	45.3003	46.3349	113.648	0	0	0	1.1925	0	0	1.8496	1.3516	0	-0.27376	-2.2786	0	1.1684	2.1313	-0.34705	2.1787	1.5506	1.0213	2.7257	1.2868	-0.64447	-1.3349	-2.4949	0	0.26828	-2.4275	-0.92384	0.27032	-2.4342	0.92157
368	-180	-180	-20	2.29497	145.558	55.3513	62.4089	113.991	0	0	0	1.1779	0	0	1.901	1.3189	0	-1.8927	-1.298	0	1.2461	2.1193	-0.34905	2.2314	1.5016	1.0232	2.7736	1.2143	-0.64281	-2.404	-0.3483	0	-1.819	-1.8446	-0.9311	-1.8376	-1.8559	0.92575
369	-180	-180	-20	2.29497	214.442	50.0718	53.1442	113.185	0	0	0	1.1783	0	0	1.996	1.2614	0	-1.8927	1.298	0	1.3932	2.1018	-0.35048	2.3367	1.4259	1.0233	2.8614	1.1001	-0.64103	-1.8282	2.3806	0	-2.1916	0.81347	-0.91911	-2.1753	0.81334	0.92413
370	-180	-180	-20	2.29497	263.149	55.6204	56.2672	111.977	0	0	0	1.177	0	0	2.2641	0.93478	0	-0.27376	2.2786	0	1.9212	1.9081	-0.34997	2.6307	1.0065	1.0267	3.0595	0.53286	-0.62705	0.53489	2.9998	0	-0.90909	2.3489	-0.87791	-0.83937	2.2782	0.92714
371	-180	-180	-20	1.15328	180	85.4039	85.4627	121.235	0	0	0	1.2225	0	0	1.8555	1.3671	0	-1.1533	0	0	1.1736	2.1504	-0.34499	2.1866	1.5785	1.0216	2.74	1.3211	-0.63816	-1.7765	0.97563	0	-1.6028	-0.58192	-0.85112	-1.6126	-0.59037	0.84294
372	-180	-180	-20	1.15328	90	103.953	104.055	178.409	0	0	0	1.3277	0	0	1.9267	1.3425	0	0	-1.1533	0	1.2328	2.1127	-0.34483	2.2674	1.5764	1.0166	2.8157	1.32	-0.63639	-1.0563	-1.5725	0	0.39294	-1.7086	-0.87029	0.39727	-1.7105	0.8676
373	-180	-180	-20	1.15328	270	142.23	142.326	192.194	0	0	0	1.3801	0	0	2.4548	0.94606	0	0	1.1533	0	2.3043	1.991	-0.32167	2.8173	0.98791	1.0367	3.2447	0.48289	-0.59315	0.75668	1.936	0	-0.73966	1.5624	-0.77952	-0.68392	1.5422	0.83489
374	-180	-180	-20	1.15328	116.36	56.7113	56.8047	124.667	0	0	0	1.2559	0	0	1.8358	1.3379	0	-0.51208	-1.0334	0	1.1263	2.0945	-0.34642	2.1694	1.5755	1.0167	2.7241	1.328	-0.63639	-1.617	-1.0167	0	-0.2549	-1.689	-0.8629	-0.24772	-1.6996	0.85373
375	-180	-180	-20	1.15328	243.64	69.5979	69.7116	148.575	0	0	0	1.2749	0	0	2.1355	1.1985	0	-0.51208	1.0334	0	1.7544	2.1723	-0.31941	2.515	1.3073	1.0225	2.9869	0.92674	-0.62471	0.050256	1.9788	0	-1.2595	1.1404	-0.8234	-1.2311	1.1427	0.84831
376	-180	-180	-20	1.53212	180	52.9549	52.9218	91.6242	0	0	0	1.2235	0	0	1.8755	1.3736	0	-1.5321	0	0	1.1896	2.1527	-0.34713	2.2007	1.5776	1.025	2.763	1.321	-0.63524	-1.979	1.0021	0	-1.8302	-0.55303	-0.89067	-1.834	-0.55525	0.88822
377	-180	-180	-20	1.53212	90	18.6933	18.7061	97.1887	0	0	0	1.2636	0	0	1.8427	1.358	0	0	-1.5321	0	1.1322	2.1139	-0.34583	2.1753	1.5876	1.0176	2.7283	1.349	-0.63942	-1.0318	-1.915	0	0.49381	-1.8987	-0.89403	0.49623	-1.9022	0.89143
378	-180	-180	-20	1.53212	270	63.4944	63.5272	114.57	0	0	0	1.2915	0	0	2.4723	0.82947	0	0	1.5321	0	2.4724	1.886	-0.31465	2.8347	0.79247	1.034	3.2008	0.28304	-0.60132	0.9156	2.0794	0	-0.60232	1.8911	-0.84884	-0.57994	1.8638	0.87464
379	-180	-180	-20	1.53212	116.36	0.12032	0.119905	74.9039	0	0	0	1.2292	0	0	1.7929	1.3549	0	-0.68029	-1.3728	0	1.068	2.096	-0.34719	2.1182	1.5862	1.0187	2.6785	1.3527	-0.63856	-1.7524	-1.1933	0	-0.38166	-1.9247	-0.89388	-0.38095	-1.9338	0.88824
380	-180	-180	-20	1.53212	243.64	10.5601	10.5658	90.8084	0	0	0	1.2381	0	0	2.1338	1.1684	0	-0.68029	1.3728	0	1.7387	2.1311	-0.32732	2.5122	1.2713	1.022	2.9811	0.89192	-0.62805	-0.030358	2.2406	0	-1.3368	1.3979	-0.87265	-1.3193	1.3921	0.88576
381	-180	-180	-20	2.06788	180	73.4941	85.219	122.263	0	0	0	1.1805	0	0	2.0154	1.2708	0	-2.0679	0	0	1.4258	2.1199	-0.34906	2.3581	1.428	1.0234	2.8765	1.0977	-0.64332	-2.7855	0.82148	0	-1.9947	-0.56701	-0.91746	-1.9913	-0.56291	0.91966
382	-180	-180	-20	2.06788	90	38.7024	38.6062	111.916	0	0	0	1.2158	0	0	1.8057	1.374	0	0	-2.0679	0	1.0952	2.129	-0.34603	2.1328	1.5924	1.0192	2.685	1.3523	-0.64501	-1.0041	-2.4838	0	0.56038	-2.1951	-0.91582	0.56389	-2.2005	0.91292
383	-180	-180	-20	2.06788	270	67.8989	67.8426	116.207	0	0	0	1.2002	0	0	2.4546	0.70113	0	0	2.0679	0	2.4754	1.7409	-0.32665	2.8174	0.65066	1.0306	3.1339	0.1068	-0.61164	1.0096	2.4221	0	-0.55813	2.3942	-0.87551	-0.53017	2.3206	0.91592
384	-180	-180	-20	2.06788	116.36	33.6372	33.5326	105.929	0	0	0	1.1987	0	0	1.8009	1.3626	0	-0.91817	-1.8529	0	1.0903	2.1159	-0.34741	2.1251	1.5764	1.0205	2.6799	1.3315	-0.64414	-1.948	-1.5198	0	-0.56485	-2.3064	-0.91901	-0.56754	-2.3172	0.9147
385	-180	-180	-20	2.06788	243.64	33.0643	32.9747	106.578	0	0	0	1.1926	0	0	2.0902	1.1529	0	-0.91817	1.8529	0	1.5811	2.0525	-0.34737	2.4489	1.2891	1.0231	2.9448	0.91554	-0.63325	-0.2626	2.7162	0	-1.518	1.7528	-0.89836	-1.4912	1.7366	0.91386
386	-180	-180	-20	2.44672	180	58.8822	81.956	107.513	0	0	0	1.1723	0	0	1.9981	1.2698	0	-2.4467	0	0	1.4021	2.1139	-0.34936	2.3384	1.4277	1.0237	2.8598	1.1006	-0.64306	-3.2043	0.77616	0	-2.2161	-0.50035	-0.92782	-2.2123	-0.49619	0.92907
387	-180	-180	-20	2.44672	90	50.314	55.8833	114.096	0	0	0	1.1847	0	0	1.8907	1.3333	0	0	-2.4467	0	1.2339	2.1329	-0.34743	2.2229	1.5197	1.0222	2.764	1.2384	-0.64377	-0.99011	-2.8854	0	0.55316	-2.424	-0.92729	0.5557	-2.4278	0.92585
388	-180	-180	-20	2.44672	270	63.219	68.007	109.774	0	0	0	1.171	0	0	2.2958	0.88629	0	0	2.4467	0	1.9745	1.8708	-0.35383	2.6619	0.95077	1.027	3.0749	0.45418	-0.62819	0.74522	3.2379	0	-0.65969	2.4609	-0.86106	-0.51737	2.3397	0.94756
389	-180	-180	-20	2.44672	116.36	47.7242	52.8782	111.206	0	0	0	1.1791	0	0	1.901	1.3214	0	-1.0864	-2.1923	0	1.2496	2.1249	-0.34828	2.2334	1.5042	1.0226	2.7731	1.2167	-0.64359	-2.0819	-1.7724	0	-0.67722	-2.5612	-0.93057	-0.68088	-2.5706	0.92839
390	-180	-180	-20	2.44672	243.64	45.1834	47.3995	109.38	0	0	0	1.1748	0	0	2.0514	1.1891	0	-1.0864	2.1923	0	1.4839	2.0528	-0.3528	2.3956	1.3395	1.0248	2.9116	0.98129	-0.63523	-0.44575	3.0666	0	-1.6314	1.986	-0.91197	-1.5934	1.961	0.92767
391	-180	-180	20	1.8	180	76.4889	76.3933	115.987	0	0	0	1.2245	0	0	1.9126	1.3706	0	-1.8	0	0	1.2388	2.16	0.34807	2.7974	1.3011	0.63774	2.2409	1.5708	-1.0247	-2.2094	1.0072	0	-1.9629	-0.5614	-0.90983	-1.9643	-0.56238	0.90908
392	-180	-180	20	1.8	90	24.8047	24.7523	101.985	0	0	0	1.2396	0	0	1.8096	1.37	0	0	-1.8	0	1.0922	2.1195	0.34588	2.6919	1.3646	0.64293	2.1386	1.5981	-1.0178	-1.0213	-2.1851	0	0.54127	-2.0482	-0.90374	0.53827	-2.0435	0.90673
393	-180	-180	20	1.8	270	64.2126	64.1962	115.541	0	0	0	1.2446	0	0	2.472	0.76103	0	0	1.8	0	2.5191	1.8111	0.3158	3.1682	0.18018	0.60682	2.8344	0.70296	-1.0317	0.98433	2.2057	0	-0.54733	2.0967	-0.89644	-0.56552	2.1373	0.87086
394	-180	-180	20	1.8	116.36	15.7954	15.7293	90.9704	0	0	0	1.215	0	0	1.783	1.364	0	-0.79923	-1.6128	0	1.0582	2.1046	0.34718	2.6652	1.3565	0.64202	2.1066	1.59	-1.0192	-1.8499	-1.3461	0	-0.47347	-2.121	-0.90387	-0.47224	-2.1112	0.9088
395	-180	-180	20	1.8	243.64	20.8242	20.7674	99.2273	0	0	0	1.2148	0	0	2.1166	1.153	0	-0.79923	1.6128	0	1.6718	2.0888	0.33735	2.9669	0.89222	0.63039	2.4876	1.2711	-1.0221	-0.1323	2.4661	0	-1.4042	1.5645	-0.90208	-1.4235	1.5748	0.88931
396	-180	-180	20	1.8	96.8508	17.8452	17.7861	96.3868	0	0	0	1.2302	0	0	1.8025	1.3658	0	-0.21471	-1.7871	0	1.0852	2.115	0.34615	2.6845	1.3578	0.64283	2.1307	1.5927	-1.018	-1.2792	-2.014	0	0.29295	-2.1062	-0.90329	0.29054	-2.1001	0.90663
397	-180	-180	20	1.8	145.558	42.4801	42.4115	100.405	0	0	0	1.2106	0	0	1.7687	1.3717	0	-1.4845	-1.018	0	1.0282	2.0955	0.34893	2.6544	1.3681	0.63823	2.0823	1.5963	-1.0228	-2.1671	-0.18251	0	-1.508	-1.6242	-0.90253	-1.4958	-1.6094	0.91232
398	-180	-180	20	1.8	214.442	35.0299	34.9561	103.724	0	0	0	1.2066	0	0	1.9707	1.2932	0	-1.4845	1.018	0	1.3571	2.1296	0.34715	2.8432	1.1681	0.64215	2.3186	1.4741	-1.02	-1.4059	2.1062	0	-1.9208	0.6127	-0.9057	-1.9325	0.61141	0.89939
399	-180	-180	20	1.8	263.149	45.549	45.5177	108.017	0	0	0	1.2327	0	0	2.3799	0.88776	0	-0.21471	1.7871	0	2.2923	1.9288	0.31918	3.1301	0.38652	0.61257	2.7533	0.87426	-1.029	0.72021	2.3061	0	-0.79238	2.0049	-0.89829	-0.81172	2.036	0.87754
400	-180	-180	20	1.1	180	111.317	111.391	146.249	0	0	0	1.2243	0	0	1.8509	1.3657	0	-1.1	0	0	1.1685	2.1487	0.34459	2.7348	1.3232	0.63911	2.1834	1.5808	-1.0205	-1.7535	0.97608	0	-1.586	-0.60392	-0.83326	-1.5763	-0.59548	0.84079
401	-180	-180	20	1.1	90	141.025	141.14	214.073	0	0	0	1.3484	0	0	1.9462	1.3412	0	0	-1.1	0	1.2534	2.1122	0.34458	2.8355	1.3192	0.63673	2.2887	1.5789	-1.0158	-1.0634	-1.5291	0	0.38598	-1.6888	-0.86012	0.37583	-1.6849	0.86712
402	-180	-180	20	1.1	270	175.947	176.053	226.211	0	0	0	1.4062	0	0	2.4504	0.97872	0	0	1.1	0	2.2645	2.0177	0.3222	3.2521	0.5395	0.59579	2.8157	1.0396	-1.0356	0.72475	1.919	0	-0.72114	1.4979	-0.82128	-0.77892	1.5149	0.76489
403	-180	-180	20	1.1	116.36	88.7634	88.8857	154.48	0	0	0	1.2636	0	0	1.845	1.336	0	-0.48842	-0.98562	0	1.1383	2.0954	0.34614	2.7334	1.3254	0.63661	2.1806	1.5759	-1.0161	-1.5999	-0.99633	0	-0.22771	-1.674	-0.84589	-0.23745	-1.6619	0.85704
404	-180	-180	20	1.1	243.64	101.254	101.394	179.261	0	0	0	1.284	0	0	2.1333	1.2044	0	-0.48842	0.98562	0	1.7454	2.176	0.31916	2.987	0.93872	0.62421	2.512	1.3194	-1.0225	0.054325	1.9479	0	-1.2271	1.1072	-0.84035	-1.2591	1.1033	0.81149
405	-180	-180	20	1.1	96.8508	118.833	118.994	194.027	0	0	0	1.3162	0	0	1.9072	1.3386	0	-0.13121	-1.0921	0	1.21	2.1063	0.34497	2.7961	1.3219	0.63698	2.2483	1.5781	-1.0154	-1.211	-1.4208	0	0.24419	-1.6984	-0.8537	0.23218	-1.692	0.86294
406	-180	-180	20	1.1	145.558	96.0456	96.139	140.962	0	0	0	1.2341	0	0	1.8222	1.3424	0	-0.90717	-0.62212	0	1.1132	2.0999	0.34701	2.7114	1.3247	0.63443	2.1502	1.5736	-1.0196	-1.9282	-0.14597	0	-0.97671	-1.3932	-0.83638	-0.97592	-1.3678	0.85443
407	-180	-180	20	1.1	214.442	95.813	95.922	151.383	0	0	0	1.2382	0	0	1.9032	1.3518	0	-0.90717	0.62212	0	1.2812	2.1846	0.33692	2.7793	1.2638	0.64295	2.2557	1.5526	-1.0163	-0.86314	1.7791	0	-1.605	0.40158	-0.84773	-1.6217	0.38837	0.82994
408	-180	-180	20	1.1	263.149	147.909	148.068	210.556	0	0	0	1.3605	0	0	2.3583	1.0416	0	-0.13121	1.0921	0	2.1346	2.0713	0.31806	3.1748	0.643	0.60392	2.7298	1.1069	-1.032	0.57037	1.9258	0	-0.85244	1.4237	-0.82864	-0.90247	1.4339	0.78033
409	-180	-180	20	2.5	180	57.6506	81.6287	106.12	0	0	0	1.172	0	0	1.9962	1.2705	0	-2.5	0	0	1.3992	2.114	0.34937	2.858	1.1022	0.64303	2.3363	1.4287	-1.0237	-3.2846	0.74831	0	-2.2346	-0.47851	-0.92971	-2.2384	-0.48304	0.92851
410	-180	-180	20	2.5	90	50.6399	57.9277	113.015	0	0	0	1.1822	0	0	1.9031	1.3265	0	0	-2.5	0	1.2536	2.1317	0.34765	2.7753	1.2222	0.64362	2.2363	1.5091	-1.0225	-0.98915	-2.94	0	0.55256	-2.4599	-0.92687	0.55021	-2.4566	0.92813
411	-180	-180	20	2.5	270	62.0417	67.6376	108.505	0	0	0	1.1703	0	0	2.2798	0.90883	0	0	2.5	0	1.9313	1.8855	0.35537	3.0674	0.49378	0.62917	2.6444	0.98274	-1.0267	0.72129	3.3132	0	-0.49999	2.3546	-0.95109	-0.65994	2.483	0.86013
412	-180	-180	20	2.5	116.36	48.3345	55.0899	110.548	0	0	0	1.1775	0	0	1.9129	1.3156	0	-1.11	-2.24	0	1.2685	2.1245	0.34839	2.7839	1.2026	0.64352	2.2463	1.495	-1.0228	-2.0996	-1.8067	0	-0.69618	-2.6047	-0.92985	-0.69246	-2.5956	0.93172
413	-180	-180	20	2.5	243.64	45.9247	49.2392	108.9	0	0	0	1.1738	0	0	2.0459	1.1965	0	-1.11	2.24	0	1.4738	2.0571	0.35278	2.9067	0.99243	0.63543	2.3889	1.3479	-1.0249	-0.4712	3.1154	0	-1.6043	1.9899	-0.92921	-1.6435	2.0159	0.91413
414	-180	-180	20	2.5	96.8508	48.9658	55.6028	111.779	0	0	0	1.1812	0	0	1.9038	1.3244	0	-0.29821	-2.4822	0	1.2545	2.1298	0.34783	2.7758	1.2193	0.64368	2.2369	1.5068	-1.0225	-1.3623	-2.6761	0	0.24863	-2.5643	-0.92824	0.24717	-2.559	0.92954
415	-180	-180	20	2.5	145.558	53.8083	67.7751	109.288	0	0	0	1.1732	0	0	1.9446	1.2973	0	-2.0618	-1.4139	0	1.317	2.1187	0.34914	2.8124	1.1622	0.64309	2.2797	1.4679	-1.0235	-2.5256	-0.44041	0	-1.9392	-1.9477	-0.93202	-1.9207	-1.9382	0.93475
416	-180	-180	20	2.5	214.442	50.569	59.1754	109.647	0	0	0	1.1738	0	0	1.9931	1.265	0	-2.0618	1.4139	0	1.3902	2.1046	0.35031	2.8575	1.1014	0.64128	2.3322	1.4272	-1.0238	-1.9788	2.4938	0	-2.2794	0.90809	-0.92927	-2.2962	0.90881	0.9256
417	-180	-180	20	2.5	263.149	54.695	58.5899	108.653	0	0	0	1.1711	0	0	2.2057	1.009	0	-0.29821	2.4822	0	1.7723	1.9484	0.35493	3.026	0.66513	0.62989	2.5642	1.1115	-1.0264	0.42779	3.2891	0	-0.82139	2.3422	-0.9389	-0.92536	2.4276	0.88236
418	-180	-180	20	1.30503	180	51.3482	51.3751	89.0029	0	0	0	1.221	0	0	1.8649	1.3702	0	-1.305	0	0	1.1821	2.1523	0.346	2.7511	1.3194	0.63617	2.1928	1.5759	-1.0237	-1.8501	0.98193	0	-1.6983	-0.56749	-0.86413	-1.6907	-0.56178	0.87016
419	-180	-180	20	1.30503	90	43.5851	43.662	120.742	0	0	0	1.292	0	0	1.886	1.3476	0	0	-1.305	0	1.1862	2.1129	0.34539	2.7739	1.329	0.63688	2.2228	1.5772	-1.0175	-1.0425	-1.7045	0	0.44021	-1.7833	-0.87879	0.43785	-1.7811	0.88082
420	-180	-180	20	1.30503	270	87.2826	87.3688	137.527	0	0	0	1.3334	0	0	2.4645	0.88474	0	0	1.305	0	2.3902	1.9387	0.31883	3.2259	0.37699	0.59418	2.8251	0.88576	-1.0367	0.83097	1.9893	0	-0.62401	1.6708	-0.85467	-0.66341	1.6945	0.81461
421	-180	-180	20	1.30503	116.36	9.89917	9.96441	81.9843	0	0	0	1.2416	0	0	1.8149	1.3443	0	-0.57945	-1.1693	0	1.0982	2.0936	0.34694	2.7026	1.3377	0.63651	2.1442	1.5781	-1.018	-1.6698	-1.0812	0	-0.30196	-1.786	-0.8703	-0.30534	-1.7769	0.87712
422	-180	-180	20	1.30503	243.64	22.7953	22.8799	103.066	0	0	0	1.2568	0	0	2.1386	1.185	0	-0.57945	1.1693	0	1.7627	2.159	0.32139	2.9861	0.90501	0.62618	2.5188	1.285	-1.0224	0.027583	2.0753	0	-1.2579	1.2434	-0.8662	-1.2793	1.245	0.84866
423	-180	-180	20	1.30503	96.8508	26.8898	26.9631	106.792	0	0	0	1.2735	0	0	1.8612	1.3444	0	-0.15567	-1.2957	0	1.1579	2.1066	0.34568	2.7487	1.3297	0.63724	2.197	1.5761	-1.017	-1.2248	-1.579	0	0.26422	-1.803	-0.87484	0.26058	-1.7993	0.87832
424	-180	-180	20	1.30503	145.558	29.7108	29.7467	78.5045	0	0	0	1.2259	0	0	1.8012	1.3531	0	-1.0763	-0.73808	0	1.077	2.0948	0.3482	2.6921	1.3423	0.63227	2.1209	1.5798	-1.0224	-1.9982	-0.14328	0	-1.132	-1.4345	-0.86247	-1.1272	-1.4131	0.87817
425	-180	-180	20	1.30503	214.442	27.9857	28.0215	89.2549	0	0	0	1.2275	0	0	1.9214	1.3431	0	-1.0763	0.73808	0	1.3018	2.1778	0.33982	2.7964	1.2483	0.644	2.2738	1.5357	-1.0174	-0.99859	1.8549	0	-1.6872	0.46453	-0.87118	-1.6973	0.45806	0.86171
426	-180	-180	20	1.30503	263.149	61.3298	61.4209	125.18	0	0	0	1.3056	0	0	2.3729	0.98152	0	-0.15567	1.2957	0	2.2315	2.0249	0.31437	3.1604	0.53057	0.60494	2.744	0.99899	-1.032	0.64407	2.0137	0	-0.79935	1.5942	-0.85718	-0.83112	1.6102	0.82691
427	-180	-180	20	2.29497	180	63.4088	83.0866	112.432	0	0	0	1.174	0	0	2.0047	1.2676	0	-2.295	0	0	1.4121	2.1142	0.34931	2.8658	1.0956	0.64314	2.3459	1.4246	-1.0236	-3.0171	0.8115	0	-2.132	-0.53056	-0.92625	-2.1355	-0.53437	0.92472
428	-180	-180	20	2.29497	90	48.1596	49.5097	116	0	0	0	1.195	0	0	1.8489	1.3552	0	0	-2.295	0	1.1672	2.1346	0.34675	2.7253	1.2924	0.64448	2.1783	1.5549	-1.0212	-0.99322	-2.7298	0	0.56356	-2.3364	-0.92094	0.56041	-2.3316	0.92306
429	-180	-180	20	2.29497	270	66.6263	68.9581	113.343	0	0	0	1.1762	0	0	2.3541	0.80868	0	0	2.295	0	2.1462	1.8201	0.34632	3.0985	0.31335	0.62319	2.7233	0.83411	-1.0281	0.84761	2.9706	0	-0.55472	2.3232	-0.93381	-0.64225	2.4239	0.86673
430	-180	-180	20	2.29497	116.36	44.6683	45.9095	112.002	0	0	0	1.1854	0	0	1.858	1.3411	0	-1.019	-2.0563	0	1.1814	2.124	0.3479	2.7334	1.2666	0.64396	2.1867	1.5362	-1.0219	-2.0302	-1.6735	0	-0.63838	-2.4739	-0.9232	-0.63496	-2.4636	0.92636
431	-180	-180	20	2.29497	243.64	41.8472	41.9208	109.803	0	0	0	1.1794	0	0	2.0664	1.1687	0	-1.019	2.0563	0	1.5126	2.0414	0.3526	2.9248	0.95102	0.63471	2.4146	1.3161	-1.0244	-0.37523	2.9288	0	-1.5592	1.8793	-0.92224	-1.5942	1.9016	0.90493
432	-180	-180	20	2.29497	96.8508	45.3003	46.3349	113.648	0	0	0	1.1925	0	0	1.8496	1.3516	0	-0.27376	-2.2786	0	1.1684	2.1313	0.34705	2.7257	1.2868	0.64447	2.1787	1.5506	-1.0213	-1.3349	-2.4949	0	0.27032	-2.4342	-0.92157	0.26828	-2.4275	0.92384
433	-180	-180	20	2.29497	145.558	55.3513	62.4089	113.991	0	0	0	1.1779	0	0	1.901	1.3189	0	-1.8927	-1.298	0	1.2461	2.1193	0.34905	2.7736	1.2143	0.64281	2.2314	1.5016	-1.0232	-2.404	-0.3483	0	-1.8376	-1.8559	-0.92575	-1.819	-1.8446	0.9311
434	-180	-180	20	2.29497	214.442	50.0718	53.1442	113.185	0	0	0	1.1783	0	0	1.996	1.2614	0	-1.8927	1.298	0	1.3932	2.1018	0.35048	2.8614	1.1001	0.64103	2.3367	1.4259	-1.0233	-1.8282	2.3806	0	-2.1753	0.81334	-0.92413	-2.1916	0.81347	0.91911
435	-180	-180	20	2.29497	263.149	55.6204	56.2672	111.977	0	0	0	1.177	0	0	2.2641	0.93478	0	-0.27376	2.2786	0	1.9212	1.9081	0.34997	3.0595	0.53286	0.62705	2.6307	1.0065	-1.0267	0.53489	2.9998	0	-0.83937	2.2782	-0.92714	-0.90909	2.3489	0.8779
436	-180	-180	20	1.15328	180	85.4039	85.4627	121.235	0	0	0	1.2225	0	0	1.8555	1.3671	0	-1.1533	0	0	1.1736	2.1504	0.34499	2.74	1.3211	0.63816	2.1866	1.5785	-1.0216	-1.7765	0.97563	0	-1.6126	-0.59037	-0.84294	-1.6028	-0.58193	0.85112
437	-180	-180	20	1.15328	90	103.953	104.055	178.409	0	0	0	1.3277	0	0	1.9267	1.3425	0	0	-1.1533	0	1.2328	2.1127	0.34483	2.8157	1.32	0.63639	2.2674	1.5764	-1.0166	-1.0563	-1.5725	0	0.39727	-1.7105	-0.8676	0.39294	-1.7086	0.87029
438	-180	-180	20	1.15328	270	142.23	142.326	192.194	0	0	0	1.3801	0	0	2.4548	0.94606	0	0	1.1533	0	2.3043	1.991	0.32167	3.2447	0.48289	0.59315	2.8173	0.98791	-1.0367	0.75668	1.936	0	-0.68392	1.5422	-0.83489	-0.73966	1.5624	0.77952
439	-180	-180	20	1.15328	116.36	56.7113	56.8047	124.667	0	0	0	1.2559	0	0	1.8358	1.3379	0	-0.51208	-1.0334	0	1.1263	2.0945	0.34642	2.7241	1.328	0.63639	2.1694	1.5755	-1.0167	-1.617	-1.0167	0	-0.24772	-1.6996	-0.85373	-0.2549	-1.689	0.8629
440	-180	-180	20	1.15328	243.64	69.5979	69.7116	148.575	0	0	0	1.2749	0	0	2.1355	1.1985	0	-0.51208	1.0334	0	1.7544	2.1723	0.31941	2.9869	0.92674	0.62471	2.515	1.3073	-1.0225	0.050256	1.9788	0	-1.2311	1.1427	-0.84831	-1.2595	1.1404	0.8234
441	-180	-180	20	1.53212	180	52.9549	52.9218	91.6242	0	0	0	1.2235	0	0	1.8755	1.3736	0	-1.5321	0	0	1.1896	2.1527	0.34713	2.763	1.321	0.63524	2.2007	1.5776	-1.025	-1.979	1.0021	0	-1.834	-0.55525	-0.88822	-1.8302	-0.55303	0.89067
442	-180	-180	20	1.53212	90	18.6933	18.7061	97.1887	0	0	0	1.2636	0	0	1.8427	1.358	0	0	-1.5321	0	1.1322	2.1139	0.34583	2.7283	1.349	0.63942	2.1753	1.5876	-1.0176	-1.0318	-1.915	0	0.49623	-1.9022	-0.89143	0.49381	-1.8987	0.89403
443	-180	-180	20	1.53212	270	63.4944	63.5272	114.57	0	0	0	1.2915	0	0	2.4723	0.82947	0	0	1.5321	0	2.4724	1.886	0.31465	3.2008	0.28304	0.60132	2.8347	0.79247	-1.034	0.9156	2.0794	0	-0.57994	1.8638	-0.87464	-0.60232	1.8911	0.84884
444	-180	-180	20	1.53212	116.36	0.12032	0.119905	74.9039	0	0	0	1.2292	0	0	1.7929	1.3549	0	-0.68029	-1.3728	0	1.068	2.096	0.34719	2.6785	1.3527	0.63856	2.1182	1.5862	-1.0187	-1.7524	-1.1933	0	-0.38095	-1.9338	-0.88824	-0.38166	-1.9247	0.89388
445	-180	-180	20	1.53212	243.64	10.5601	10.5658	90.8084	0	0	0	1.2381	0	0	2.1338	1.1684	0	-0.68029	1.3728	0	1.7387	2.1311	0.32732	2.9811	0.89192	0.62805	2.5122	1.2713	-1.022	-0.030358	2.2406	0	-1.3193	1.3921	-0.88576	-1.3368	1.3979	0.87265
446	-180	-180	20	2.06788	180	73.4941	85.219	122.263	0	0	0	1.1805	0	0	2.0154	1.2708	0	-2.0679	0	0	1.4258	2.1199	0.34906	2.8765	1.0977	0.64332	2.3581	1.428	-1.0234	-2.7855	0.82147	0	-1.9913	-0.56291	-0.91966	-1.9947	-0.56701	0.91746
447	-180	-180	20	2.06788	90	38.7024	38.6062	111.916	0	0	0	1.2158	0	0	1.8057	1.374	0	0	-2.0679	0	1.0952	2.129	0.34603	2.685	1.3523	0.64501	2.1328	1.5924	-1.0192	-1.0041	-2.4838	0	0.56389	-2.2005	-0.91292	0.56038	-2.1951	0.91582
448	-180	-180	20	2.06788	270	67.8989	67.8426	116.207	0	0	0	1.2002	0	0	2.4546	0.70113	0	0	2.0679	0	2.4754	1.7409	0.32665	3.1339	0.1068	0.61165	2.8174	0.65066	-1.0306	1.0096	2.4221	0	-0.53017	2.3206	-0.91592	-0.55813	2.3942	0.87551
449	-180	-180	20	2.06788	116.36	33.6372	33.5326	105.929	0	0	0	1.1987	0	0	1.8009	1.3626	0	-0.91817	-1.8529	0	1.0903	2.1159	0.34741	2.6799	1.3315	0.64414	2.1251	1.5764	-1.0205	-1.948	-1.5198	0	-0.56754	-2.3172	-0.9147	-0.56485	-2.3064	0.91901
450	-180	-180	20	2.06788	243.64	33.0643	32.9747	106.578	0	0	0	1.1926	0	0	2.0902	1.1529	0	-0.91817	1.8529	0	1.5811	2.0525	0.34737	2.9448	0.91554	0.63325	2.4489	1.2891	-1.0231	-0.2626	2.7162	0	-1.4912	1.7366	-0.91386	-1.518	1.7528	0.89836
451	-180	-180	20	2.44672	180	58.8822	81.956	107.513	0	0	0	1.1723	0	0	1.9981	1.2698	0	-2.4467	0	0	1.4021	2.114	0.34936	2.8598	1.1006	0.64306	2.3384	1.4277	-1.0237	-3.2043	0.77616	0	-2.2123	-0.49618	-0.92908	-2.2161	-0.50034	0.92782
452	-180	-180	20	2.44672	90	50.314	55.8833	114.096	0	0	0	1.1847	0	0	1.8907	1.3333	0	0	-2.4467	0	1.2339	2.1329	0.34743	2.764	1.2384	0.64377	2.2229	1.5197	-1.0222	-0.99011	-2.8854	0	0.5557	-2.4278	-0.92585	0.55316	-2.424	0.92729
453	-180	-180	20	2.44672	270	63.219	68.007	109.774	0	0	0	1.171	0	0	2.2958	0.88629	0	0	2.4467	0	1.9745	1.8708	0.35383	3.0749	0.45417	0.62819	2.6619	0.95077	-1.027	0.74522	3.2379	0	-0.51737	2.3397	-0.94756	-0.65969	2.4609	0.86107
454	-180	-180	20	2.44672	116.36	47.7242	52.8782	111.206	0	0	0	1.1791	0	0	1.901	1.3214	0	-1.0864	-2.1923	0	1.2496	2.1249	0.34828	2.7731	1.2167	0.64359	2.2334	1.5042	-1.0226	-2.0819	-1.7724	0	-0.68088	-2.5706	-0.92839	-0.67722	-2.5612	0.93057
455	-180	-180	20	2.44672	243.64	45.1834	47.3995	109.38	0	0	0	1.1748	0	0	2.0514	1.1891	0	-1.0864	2.1923	0	1.4839	2.0528	0.3528	2.9116	0.98129	0.63523	2.3956	1.3395	-1.0248	-0.44575	3.0666	0	-1.5934	1.961	-0.92767	-1.6314	1.986	0.91197
456	-180	-180	100	1.8	180	76.5034	76.4076	115.979	0	0	0	1.2245	0	0	1.9116	1.3715	0	-1.8	0	0	2.2186	1.5787	1.0301	2.8045	1.3056	-0.62599	1.2353	2.1582	-0.34951	-2.2094	1.0072	0	-1.9642	-0.56235	-0.90912	-1.963	-0.56143	0.90979
457	-180	-180	100	1.8	90	24.8428	24.7902	101.908	0	0	0	1.2395	0	0	1.8089	1.3706	0	0	-1.8	0	2.1036	1.6081	1.0266	2.7025	1.3711	-0.6256	1.0873	2.1168	-0.34551	-1.0213	-2.185	0	0.53809	-2.0431	-0.90693	0.54143	-2.0486	0.90355
458	-180	-180	100	1.8	270	64.0102	63.9988	115.224	0	0	0	1.2447	0	0	2.4642	0.77654	0	0	1.8	0	2.8084	0.77846	1.0391	3.1817	0.16478	-0.55022	2.5094	1.7948	-0.40475	0.98346	2.2079	0	-0.56778	2.1404	-0.86833	-0.54656	2.093	0.89813
459	-180	-180	100	1.8	116.36	15.8244	15.758	90.9301	0	0	0	1.2149	0	0	1.7826	1.3645	0	-0.79923	-1.6128	0	2.0759	1.5981	1.027	2.6738	1.363	-0.62806	1.0527	2.1025	-0.34322	-1.8499	-1.3461	0	-0.47207	-2.1106	-0.90905	-0.47353	-2.1215	0.90362
460	-180	-180	100	1.8	243.64	20.7779	20.7223	99.0196	0	0	0	1.2149	0	0	2.1123	1.1574	0	-0.79923	1.6128	0	2.4556	1.3043	1.028	2.9823	0.88168	-0.59666	1.6767	2.0787	-0.38568	-0.12992	2.4643	0	-1.4241	1.576	-0.88892	-1.4035	1.5648	0.90261
461	-180	-180	100	1.8	96.8508	17.8813	17.8223	96.3306	0	0	0	1.2301	0	0	1.8019	1.3663	0	-0.21471	-1.7871	0	2.0968	1.6023	1.0266	2.6946	1.3641	-0.62628	1.0804	2.1124	-0.34512	-1.2792	-2.014	0	0.29044	-2.0997	-0.90684	0.29307	-2.1065	0.90309
462	-180	-180	100	1.8	145.558	42.4954	42.4266	100.397	0	0	0	1.2105	0	0	1.7684	1.3721	0	-1.4845	-1.018	0	2.0576	1.6016	1.0293	2.6598	1.3753	-0.62869	1.0217	2.094	-0.34047	-2.1672	-0.18254	0	-1.4952	-1.6089	-0.91268	-1.5085	-1.6247	0.90217
463	-180	-180	100	1.8	214.442	35.051	34.9769	103.676	0	0	0	1.2065	0	0	1.97	1.2939	0	-1.4845	1.018	0	2.2934	1.486	1.0263	2.8527	1.1701	-0.62744	1.3548	2.1273	-0.35213	-1.4062	2.1062	0	-1.9327	0.61133	-0.89929	-1.9206	0.61264	0.90578
464	-180	-180	100	1.8	263.149	45.3072	45.2816	107.683	0	0	0	1.2328	0	0	2.3701	0.90256	0	-0.21471	1.7871	0	2.7209	0.94782	1.0356	3.1447	0.37062	-0.55506	2.2855	1.9098	-0.41336	0.72025	2.3064	0	-0.81344	2.0386	-0.87575	-0.79133	2.0025	0.89958
465	-180	-180	100	1.1	180	111.342	111.415	146.203	0	0	0	1.2243	0	0	1.85	1.3665	0	-1.1	0	0	2.153	1.5929	1.0274	2.7471	1.3238	-0.61956	1.1691	2.1453	-0.3572	-1.7535	0.976	0	-1.5758	-0.59502	-0.84127	-1.5866	-0.60447	0.83276
466	-180	-180	100	1.1	90	141.061	141.176	214.017	0	0	0	1.3483	0	0	1.9456	1.3419	0	0	-1.1	0	2.2542	1.591	1.0243	2.8477	1.3223	-0.61704	1.2516	2.1091	-0.3514	-1.0635	-1.529	0	0.37643	-1.6852	-0.86664	0.3852	-1.6887	0.86062
467	-180	-180	100	1.1	270	175.757	175.857	225.928	0	0	0	1.4078	0	0	2.4423	0.99102	0	0	1.1	0	2.8023	1.0833	1.0345	3.2567	0.52774	-0.56122	2.2661	2.0047	-0.39571	0.72347	1.9196	0	-0.77957	1.5157	-0.76496	-0.72363	1.4968	0.81973
468	-180	-180	100	1.1	116.36	88.7939	88.9159	154.442	0	0	0	1.2635	0	0	1.8444	1.3366	0	-0.48842	-0.98562	0	2.1496	1.5859	1.0238	2.7432	1.3298	-0.62045	1.1349	2.0929	-0.34804	-1.5999	-0.99628	0	-0.23753	-1.6616	-0.85721	-0.22777	-1.6742	0.84573
469	-180	-180	100	1.1	243.64	101.058	101.198	179.02	0	0	0	1.2838	0	0	2.1234	1.2125	0	-0.48842	0.98562	0	2.4605	1.3803	1.0296	3.0093	0.91927	-0.56512	1.752	2.1562	-0.40925	0.055304	1.9477	0	-1.2603	1.1038	-0.81034	-1.2262	1.107	0.84119
470	-180	-180	100	1.1	96.8508	118.869	119.03	193.993	0	0	0	1.3161	0	0	1.9066	1.3392	0	-0.13121	-1.0921	0	2.2143	1.5897	1.0238	2.8077	1.3255	-0.61814	1.2076	2.1034	-0.35012	-1.2111	-1.4207	0	0.23242	-1.6921	-0.86274	0.24378	-1.6984	0.85391
471	-180	-180	100	1.1	145.558	96.0677	96.1609	140.938	0	0	0	1.234	0	0	1.8215	1.3429	0	-0.90717	-0.62212	0	2.1236	1.5821	1.0261	2.7197	1.3285	-0.62058	1.1101	2.0978	-0.34861	-1.9282	-0.14595	0	-0.97583	-1.367	-0.85496	-0.97686	-1.3939	0.83587
472	-180	-180	100	1.1	214.442	95.8345	95.941	151.267	0	0	0	1.2381	0	0	1.9014	1.3531	0	-0.90717	0.62212	0	2.2124	1.5767	1.0253	2.7999	1.2576	-0.60927	1.2871	2.1772	-0.37118	-0.86293	1.7792	0	-1.6223	0.38782	-0.82922	-1.6044	0.40211	0.84835
473	-180	-180	100	1.1	263.149	147.675	147.83	210.208	0	0	0	1.3612	0	0	2.3485	1.0535	0	-0.13121	1.0921	0	2.7018	1.1638	1.034	3.1856	0.62668	-0.55618	2.1364	2.0539	-0.40429	0.56962	1.9263	0	-0.90343	1.4349	-0.77956	-0.85323	1.4225	0.82839
474	-180	-180	100	2.5	180	57.6608	81.6317	106.107	0	0	0	1.1719	0	0	1.996	1.2709	0	-2.5	0	0	2.3197	1.437	1.0279	2.8644	1.1035	-0.63368	1.3974	2.1127	-0.3512	-3.2847	0.74824	0	-2.2384	-0.48304	-0.92851	-2.2345	-0.47849	0.92971
475	-180	-180	100	2.5	90	50.6583	57.9503	112.964	0	0	0	1.1821	0	0	1.9029	1.3268	0	0	-2.5	0	2.2133	1.5185	1.0282	2.7839	1.2242	-0.63087	1.2518	2.1298	-0.35041	-0.98903	-2.9403	0	0.55009	-2.4562	-0.92818	0.55265	-2.46	0.92682
476	-180	-180	100	2.5	270	62.041	67.573	108.573	0	0	0	1.1701	0	0	2.279	0.90904	0	0	2.5	0	2.6481	0.97784	1.0255	3.064	0.49901	-0.63566	1.9261	1.8875	-0.34718	0.71775	3.3164	0	-0.66056	2.4814	-0.85963	-0.49932	2.3532	0.95125
477	-180	-180	100	2.5	116.36	48.3502	55.1076	110.495	0	0	0	1.1775	0	0	1.9127	1.3159	0	-1.11	-2.24	0	2.2252	1.5037	1.0281	2.7914	1.205	-0.63238	1.2661	2.123	-0.34932	-2.0996	-1.8068	0	-0.69228	-2.5952	-0.93178	-0.69624	-2.6049	0.92979
478	-180	-180	100	2.5	243.64	45.9226	49.2189	108.921	0	0	0	1.1737	0	0	2.0457	1.1964	0	-1.11	2.24	0	2.3819	1.3501	1.0271	2.9075	0.99694	-0.63501	1.4688	2.0579	-0.34341	-0.47339	3.1171	0	-1.6428	2.0149	-0.91427	-1.6046	1.9895	0.929
479	-180	-180	100	2.5	96.8508	48.9837	55.6234	111.705	0	0	0	1.1812	0	0	1.9035	1.3248	0	-0.29821	-2.4822	0	2.2143	1.5161	1.0281	2.7841	1.2214	-0.63134	1.2525	2.128	-0.35	-1.3623	-2.6763	0	0.24713	-2.5586	-0.9296	0.24871	-2.5644	0.92819
480	-180	-180	100	2.5	145.558	53.8205	67.7871	109.254	0	0	0	1.1732	0	0	1.9444	1.2976	0	-2.0618	-1.4139	0	2.2613	1.4759	1.0282	2.819	1.1644	-0.63343	1.3147	2.1175	-0.34953	-2.5256	-0.44043	0	-1.9202	-1.9379	-0.9348	-1.9396	-1.9479	0.93196
481	-180	-180	100	2.5	214.442	50.5762	59.1734	109.631	0	0	0	1.1737	0	0	1.9928	1.2654	0	-2.0618	1.4139	0	2.3177	1.4339	1.0276	2.8621	1.1042	-0.6345	1.387	2.1041	-0.34809	-1.9794	2.4938	0	-2.2961	0.90873	-0.92561	-2.2792	0.908	0.92925
482	-180	-180	100	2.5	263.149	54.6919	58.5465	108.719	0	0	0	1.171	0	0	2.2054	1.0087	0	-0.29821	2.4822	0	2.5663	1.1079	1.026	3.0234	0.66967	-0.63521	1.7676	1.9501	-0.34521	0.42469	3.292	0	-0.9248	2.4256	-0.88265	-0.82191	2.3418	0.93857
483	-180	-180	100	1.30503	180	51.3697	51.3965	88.9783	0	0	0	1.2209	0	0	1.8639	1.3711	0	-1.305	0	0	2.1653	1.5859	1.0302	2.7609	1.3225	-0.62015	1.1802	2.1497	-0.3524	-1.8501	0.98189	0	-1.6902	-0.56146	-0.87052	-1.6987	-0.56783	0.86376
484	-180	-180	100	1.30503	90	43.6214	43.698	120.686	0	0	0	1.292	0	0	1.8852	1.3483	0	0	-1.305	0	2.1884	1.588	1.0261	2.7846	1.3346	-0.61907	1.182	2.1102	-0.34682	-1.0426	-1.7044	0	0.4378	-1.781	-0.88087	0.4401	-1.7835	0.87874
485	-180	-180	100	1.30503	270	87.1677	87.2513	137.319	0	0	0	1.3339	0	0	2.4585	0.8952	0	0	1.305	0	2.8036	0.93532	1.0409	3.2354	0.36654	-0.55548	2.3873	1.9274	-0.38144	0.82995	1.9902	0	-0.66485	1.6954	-0.81325	-0.62378	1.6695	0.85545
486	-180	-180	100	1.30503	116.36	9.92702	9.992	81.943	0	0	0	1.2415	0	0	1.8143	1.3448	0	-0.57945	-1.1693	0	2.1139	1.5866	1.0257	2.7109	1.3439	-0.62237	1.0929	2.0914	-0.3439	-1.6698	-1.0811	0	-0.30537	-1.7765	-0.87736	-0.30202	-1.7864	0.87006
487	-180	-180	100	1.30503	243.64	22.6525	22.7323	102.762	0	0	0	1.2566	0	0	2.1298	1.1927	0	-0.57945	1.1693	0	2.4664	1.3447	1.0311	3.009	0.88829	-0.56895	1.7667	2.1404	-0.40404	0.028583	2.0749	0	-1.2802	1.2454	-0.84786	-1.2569	1.2431	0.86696
488	-180	-180	100	1.30503	96.8508	26.9252	26.9982	106.735	0	0	0	1.2735	0	0	1.8605	1.345	0	-0.15567	-1.2957	0	2.1632	1.5865	1.0256	2.7591	1.3354	-0.6201	1.1534	2.104	-0.34618	-1.2248	-1.579	0	0.26051	-1.7991	-0.87843	0.26415	-1.8033	0.87474
489	-180	-180	100	1.30503	145.558	29.7273	29.7631	78.4979	0	0	0	1.2258	0	0	1.8007	1.3536	0	-1.0763	-0.73808	0	2.0964	1.586	1.0287	2.6981	1.3485	-0.62169	1.0715	2.0933	-0.34299	-1.9982	-0.14326	0	-1.127	-1.4124	-0.87866	-1.1323	-1.4351	0.86197
490	-180	-180	100	1.30503	214.442	28.0194	28.0539	89.1272	0	0	0	1.2274	0	0	1.92	1.3444	0	-1.0763	0.73808	0	2.233	1.5568	1.0265	2.8148	1.2454	-0.61451	1.3046	2.1717	-0.36523	-0.9986	1.8549	0	-1.6976	0.45775	-0.86139	-1.6869	0.46475	0.87146
491	-180	-180	100	1.30503	263.149	61.1502	61.2383	124.839	0	0	0	1.3059	0	0	2.3641	0.99334	0	-0.15567	1.2957	0	2.7082	1.0652	1.0387	3.1755	0.51586	-0.55123	2.2278	2.0079	-0.39693	0.64285	2.0151	0	-0.83267	1.6109	-0.82553	-0.79902	1.5927	0.85798
492	-180	-180	100	2.29497	180	63.419	83.0927	112.419	0	0	0	1.1739	0	0	2.0044	1.268	0	-2.295	0	0	2.3292	1.4331	1.0278	2.8722	1.0968	-0.6336	1.4104	2.1129	-0.35157	-3.0171	0.81144	0	-2.1355	-0.53439	-0.92471	-2.1319	-0.53053	0.92626
493	-180	-180	100	2.29497	90	48.1852	49.5378	115.956	0	0	0	1.1949	0	0	1.8486	1.3556	0	0	-2.295	0	2.1507	1.5647	1.028	2.7351	1.2957	-0.62973	1.1647	2.1324	-0.34905	-0.99314	-2.73	0	0.56025	-2.3311	-0.92317	0.56372	-2.3366	0.92084
494	-180	-180	100	2.29497	270	66.5673	68.9457	113.169	0	0	0	1.1767	0	0	2.3557	0.80988	0	0	2.295	0	2.7249	0.84367	1.0274	3.1023	0.29418	-0.60528	2.1658	1.8093	-0.3872	0.86183	2.9512	0	-0.64142	2.4353	-0.8655	-0.55163	2.327	0.93538
495	-180	-180	100	2.29497	116.36	44.6884	45.9314	111.953	0	0	0	1.1853	0	0	1.8578	1.3414	0	-1.019	-2.0563	0	2.1624	1.5448	1.028	2.7415	1.2702	-0.63181	1.1781	2.1224	-0.3474	-2.0302	-1.6736	0	-0.63474	-2.4631	-0.92648	-0.63845	-2.4742	0.92308
496	-180	-180	100	2.29497	243.64	41.8473	41.9181	109.826	0	0	0	1.1793	0	0	2.0663	1.1686	0	-1.019	2.0563	0	2.4075	1.3189	1.0264	2.9262	0.95413	-0.63313	1.5089	2.0418	-0.34638	-0.37672	2.93	0	-1.5939	1.9009	-0.90501	-1.5594	1.8789	0.92209
497	-180	-180	100	2.29497	96.8508	45.3247	46.3615	113.603	0	0	0	1.1924	0	0	1.8493	1.352	0	-0.27376	-2.2786	0	2.1519	1.5601	1.028	2.735	1.2902	-0.63038	1.1656	2.1292	-0.34849	-1.3349	-2.4951	0	0.26822	-2.427	-0.92395	0.27044	-2.4344	0.92146
498	-180	-180	100	2.29497	145.558	55.3648	62.4221	113.958	0	0	0	1.1778	0	0	1.9007	1.3192	0	-1.8927	-1.298	0	2.2116	1.5092	1.0283	2.7801	1.2176	-0.6332	1.2429	2.1181	-0.34753	-2.404	-0.34832	0	-1.8185	-1.8443	-0.93121	-1.838	-1.8561	0.92562
499	-180	-180	100	2.29497	214.442	50.0787	53.1459	113.192	0	0	0	1.1782	0	0	1.9956	1.2618	0	-1.8927	1.298	0	2.3219	1.4325	1.0271	2.8658	1.1035	-0.63457	1.3894	2.1014	-0.34716	-1.8288	2.3807	0	-2.1914	0.81338	-0.9191	-2.1751	0.81323	0.92412
500	-180	-180	100	2.29497	263.149	55.6023	56.2712	111.843	0	0	0	1.1773	0	0	2.2649	0.93545	0	-0.27376	2.2786	0	2.631	1.0116	1.0264	3.0628	0.52226	-0.61727	1.9328	1.9035	-0.37274	0.54249	2.9908	0	-0.909	2.3539	-0.87749	-0.83793	2.2802	0.92793
501	-180	-180	100	1.15328	180	85.4277	85.4863	121.19	0	0	0	1.2224	0	0	1.8545	1.3679	0	-1.1533	0	0	2.1569	1.59	1.0284	2.7516	1.3225	-0.61963	1.1734	2.1472	-0.35568	-1.7765	0.97557	0	-1.6022	-0.58146	-0.85161	-1.6132	-0.59089	0.84243
502	-180	-180	100	1.15328	90	103.989	104.091	178.353	0	0	0	1.3277	0	0	1.926	1.3432	0	0	-1.1533	0	2.233	1.5881	1.0251	2.8273	1.324	-0.61736	1.2302	2.1097	-0.34974	-1.0564	-1.5724	0	0.39323	-1.7087	-0.87007	0.39679	-1.7105	0.86784
503	-180	-180	100	1.15328	270	142.076	142.169	191.972	0	0	0	1.3812	0	0	2.4477	0.95723	0	0	1.1533	0	2.8028	1.0302	1.0371	3.2501	0.47249	-0.55981	2.3044	1.9792	-0.38813	0.75554	1.9367	0	-0.74068	1.5631	-0.77881	-0.685	1.5411	0.83463
504	-180	-180	100	1.15328	116.36	56.7411	56.8341	124.65	0	0	0	1.2558	0	0	1.8351	1.3385	0	-0.51208	-1.0334	0	2.1387	1.585	1.0244	2.7333	1.3331	-0.62097	1.1222	2.0922	-0.34654	-1.617	-1.0166	0	-0.25497	-1.6887	-0.8631	-0.24779	-1.6999	0.85355
505	-180	-180	100	1.15328	243.64	69.4194	69.5316	148.305	0	0	0	1.2747	0	0	2.126	1.2065	0	-0.51208	1.0334	0	2.4626	1.3684	1.0303	3.0096	0.9081	-0.56569	1.7601	2.1527	-0.40753	0.051185	1.9785	0	-1.2606	1.1408	-0.82234	-1.23	1.1424	0.84918
506	-180	-180	100	1.53212	180	52.9727	52.9395	91.5959	0	0	0	1.2234	0	0	1.8746	1.3745	0	-1.5321	0	0	2.1759	1.586	1.031	2.771	1.3254	-0.62186	1.1864	2.1507	-0.34965	-1.979	1.002	0	-1.83	-0.55288	-0.89085	-1.8343	-0.5554	0.88804
507	-180	-180	100	1.53212	90	18.7303	18.7428	97.1104	0	0	0	1.2635	0	0	1.842	1.3586	0	0	-1.5321	0	2.1405	1.5977	1.0264	2.7387	1.3556	-0.62219	1.1271	2.1113	-0.34524	-1.0319	-1.915	0	0.49366	-1.8985	-0.89419	0.49629	-1.9026	0.89127
508	-180	-180	100	1.53212	270	63.3694	63.4021	114.306	0	0	0	1.2918	0	0	2.4658	0.84162	0	0	1.5321	0	2.8053	0.85892	1.042	3.2152	0.2696	-0.5503	2.4659	1.8726	-0.38786	0.91455	2.081	0	-0.60407	1.8926	-0.84711	-0.57945	1.8618	0.87578
509	-180	-180	100	1.53212	116.36	0.14819	0.147479	74.8856	0	0	0	1.2291	0	0	1.7923	1.3554	0	-0.68029	-1.3728	0	2.0876	1.5942	1.0265	2.6866	1.3596	-0.62481	1.0621	2.0939	-0.3426	-1.7524	-1.1933	0	-0.38159	-1.9242	-0.89414	-0.38101	-1.9342	0.88798
510	-180	-180	100	1.53212	243.64	10.4575	10.4612	90.5213	0	0	0	1.238	0	0	2.1265	1.1751	0	-0.68029	1.3728	0	2.4657	1.3226	1.0301	3.0019	0.87758	-0.57828	1.7426	2.1152	-0.39877	-0.028835	2.2397	0	-1.3375	1.3987	-0.8721	-1.3185	1.3921	0.88638
511	-180	-180	100	2.06788	180	73.5051	85.2302	122.228	0	0	0	1.1804	0	0	2.015	1.2712	0	-2.0679	0	0	2.3407	1.4371	1.0277	2.8834	1.0987	-0.63305	1.4243	2.1184	-0.35232	-2.7855	0.82144	0	-1.9947	-0.56708	-0.91743	-1.9913	-0.56285	0.91969
512	-180	-180	100	2.06788	90	38.737	38.6408	111.859	0	0	0	1.2157	0	0	1.8052	1.3745	0	0	-2.0679	0	2.1	1.6023	1.0274	2.6956	1.3576	-0.62828	1.0914	2.1264	-0.34704	-1.0041	-2.4838	0	0.56018	-2.1945	-0.916	0.5641	-2.2008	0.91275
513	-180	-180	100	2.06788	270	67.6381	67.5803	116.107	0	0	0	1.2004	0	0	2.4466	0.71848	0	0	2.0679	0	2.8032	0.71382	1.0332	3.1414	0.093234	-0.56379	2.468	1.7248	-0.41777	1.0103	2.4202	0	-0.56062	2.4013	-0.87134	-0.52773	2.3149	0.91892
514	-180	-180	100	2.06788	116.36	33.6634	33.5586	105.886	0	0	0	1.1986	0	0	1.8006	1.363	0	-0.91817	-1.8529	0	2.0966	1.5847	1.0277	2.6885	1.3368	-0.63074	1.0858	2.1139	-0.34494	-1.948	-1.5198	0	-0.56462	-2.3058	-0.91922	-0.56761	-2.3176	0.9145
515	-180	-180	100	2.06788	243.64	33.0648	32.9752	106.509	0	0	0	1.1926	0	0	2.0891	1.1541	0	-0.91817	1.8529	0	2.4333	1.3021	1.0265	2.9524	0.91182	-0.61931	1.5832	2.0492	-0.36328	-0.26134	2.7152	0	-1.5184	1.7536	-0.89819	-1.4909	1.7368	0.91408
516	-180	-180	100	2.44672	180	58.8925	81.9599	107.477	0	0	0	1.1723	0	0	1.9978	1.2702	0	-2.4467	0	0	2.3218	1.436	1.0279	2.8661	1.1019	-0.63368	1.4004	2.1127	-0.35128	-3.2045	0.77604	0	-2.216	-0.50034	-0.92782	-2.2122	-0.49614	0.92907
517	-180	-180	100	2.44672	90	50.3339	55.9056	114.023	0	0	0	1.1847	0	0	1.8904	1.3337	0	0	-2.4467	0	2.199	1.5293	1.0282	2.7728	1.2406	-0.63057	1.2319	2.131	-0.35014	-0.99	-2.8857	0	0.55303	-2.4237	-0.92736	0.5558	-2.4279	0.92579
518	-180	-180	100	2.44672	270	63.2195	68.0399	109.752	0	0	0	1.1711	0	0	2.2963	0.886	0	0	2.4467	0	2.6661	0.94695	1.0258	3.0737	0.45253	-0.62969	1.9777	1.8704	-0.3559	0.74677	3.2364	0	-0.65952	2.4616	-0.86117	-0.51737	2.34	0.94757
519	-180	-180	100	2.44672	116.36	47.7408	52.8963	111.154	0	0	0	1.1791	0	0	1.9007	1.3218	0	-1.0864	-2.1923	0	2.2116	1.5129	1.0281	2.7807	1.2194	-0.63223	1.247	2.1233	-0.34892	-2.082	-1.7725	0	-0.67703	-2.5608	-0.93064	-0.68094	-2.5709	0.92832
520	-180	-180	100	2.44672	243.64	45.1816	47.3836	109.402	0	0	0	1.1747	0	0	2.0513	1.189	0	-1.0864	2.1923	0	2.3888	1.3417	1.0269	2.9124	0.98553	-0.63471	1.4791	2.0535	-0.34392	-0.44781	3.0682	0	-1.6308	1.985	-0.9121	-1.5936	1.9606	0.92747
521	-180	-180	140	1.8	180	76.4284	76.3336	116.134	0	0	0	1.2246	0	0	1.9135	1.3686	0	-1.8	0	0	2.7765	1.312	0.66818	2.2842	1.5402	-1.0158	1.2269	2.1695	0.29219	-2.209	1.0074	0	-1.9632	-0.56142	-0.90976	-1.9644	-0.56224	0.90915
522	-180	-180	140	1.8	90	24.6958	24.6435	102.269	0	0	0	1.2397	0	0	1.8102	1.3683	0	0	-1.8	0	2.6742	1.375	0.66699	2.1814	1.5678	-1.0102	1.0782	2.1299	0.28273	-1.0213	-2.185	0	0.54123	-2.0484	-0.90373	0.53823	-2.0436	0.90673
523	-180	-180	140	1.8	270	64.3607	64.3423	115.666	0	0	0	1.2446	0	0	2.4764	0.75394	0	0	1.8	0	3.1351	0.20865	0.67881	2.8833	0.63058	-1.0078	2.5257	1.8168	0.27192	0.98482	2.2043	0	-0.54799	2.0989	-0.89531	-0.56469	2.135	0.87222
524	-180	-180	140	1.8	116.36	15.6836	15.6176	91.2505	0	0	0	1.2151	0	0	1.7837	1.3624	0	-0.79923	-1.6128	0	2.647	1.3668	0.66705	2.1507	1.5598	-1.0113	1.0438	2.1148	0.28351	-1.8499	-1.346	0	-0.4736	-2.121	-0.90389	-0.47229	-2.1112	0.90878
525	-180	-180	140	1.8	243.64	20.8641	20.8064	99.3825	0	0	0	1.2148	0	0	2.1198	1.15	0	-0.79923	1.6128	0	2.9433	0.90318	0.67108	2.5288	1.2398	-1.0099	1.6701	2.0949	0.30386	-0.1335	2.4669	0	-1.4051	1.5645	-0.90152	-1.4228	1.5739	0.88979
526	-180	-180	140	1.8	96.8508	17.7369	17.6781	96.6705	0	0	0	1.2303	0	0	1.8031	1.3641	0	-0.21471	-1.7871	0	2.6669	1.3682	0.66695	2.1734	1.5626	-1.0104	1.0712	2.1253	0.28333	-1.2792	-2.014	0	0.29286	-2.1063	-0.90329	0.29049	-2.1002	0.90664
527	-180	-180	140	1.8	145.558	42.362	42.2937	100.679	0	0	0	1.2108	0	0	1.7699	1.3697	0	-1.4845	-1.018	0	2.6332	1.3785	0.66789	2.1322	1.5647	-1.0136	1.0129	2.1055	0.2817	-2.1671	-0.1825	0	-1.5079	-1.6239	-0.9027	-1.496	-1.6097	0.91216
528	-180	-180	140	1.8	214.442	34.975	34.9024	103.946	0	0	0	1.2066	0	0	1.9716	1.2916	0	-1.4845	1.018	0	2.8274	1.1784	0.66631	2.3532	1.4451	-1.0128	1.3478	2.1394	0.29755	-1.4066	2.1062	0	-1.921	0.61253	-0.9055	-1.932	0.61135	0.8996
529	-180	-180	140	1.8	263.149	45.6959	45.663	108.094	0	0	0	1.2327	0	0	2.3843	0.88245	0	-0.21471	1.7871	0	3.0967	0.40979	0.6784	2.8034	0.81883	-1.0079	2.2966	1.9332	0.28712	0.72054	2.3053	0	-0.79334	2.0063	-0.89731	-0.8107	2.0344	0.87868
530	-180	-180	140	1.1	180	111.269	111.343	146.385	0	0	0	1.2243	0	0	1.852	1.3643	0	-1.1	0	0	2.7146	1.3333	0.6684	2.2251	1.554	-1.0117	1.1576	2.1575	0.29309	-1.7535	0.97616	0	-1.5861	-0.60386	-0.83319	-1.5763	-0.5952	0.84098
531	-180	-180	140	1.1	90	140.937	141.052	214.308	0	0	0	1.3483	0	0	1.9465	1.34	0	0	-1.1	0	2.8136	1.3321	0.66709	2.335	1.5474	-1.0065	1.2386	2.1222	0.28198	-1.0634	-1.529	0	0.38474	-1.6884	-0.86106	0.37689	-1.6854	0.86633
532	-180	-180	140	1.1	270	176.169	176.276	226.087	0	0	0	1.4061	0	0	2.4573	0.97188	0	0	1.1	0	3.2106	0.56598	0.67918	2.8852	0.97341	-1.0108	2.2687	2.0222	0.28347	0.72535	1.9185	0	-0.72808	1.4985	-0.81521	-0.77344	1.5129	0.77104
533	-180	-180	140	1.1	116.36	88.6681	88.791	154.685	0	0	0	1.2636	0	0	1.8456	1.3347	0	-0.48842	-0.98562	0	2.7125	1.3372	0.66587	2.2271	1.5453	-1.0071	1.1236	2.1053	0.28331	-1.5999	-0.99612	0	-0.22842	-1.6735	-0.84642	-0.23729	-1.6623	0.85667
534	-180	-180	140	1.1	243.64	101.359	101.497	179.343	0	0	0	1.2841	0	0	2.1375	1.2018	0	-0.48842	0.98562	0	2.9541	0.95277	0.67971	2.5644	1.2859	-1.005	1.7454	2.181	0.29023	0.054239	1.9478	0	-1.2296	1.1064	-0.83822	-1.2569	1.1035	0.81361
535	-180	-180	140	1.1	96.8508	118.741	118.902	194.28	0	0	0	1.3162	0	0	1.9075	1.3373	0	-0.13121	-1.0921	0	2.7748	1.3344	0.66651	2.2944	1.5469	-1.0063	1.1952	2.1163	0.28209	-1.2111	-1.4206	0	0.24319	-1.698	-0.85446	0.23288	-1.6925	0.86235
536	-180	-180	140	1.1	145.558	95.9628	96.0568	141.133	0	0	0	1.2341	0	0	1.8233	1.3408	0	-0.90717	-0.62212	0	2.689	1.3359	0.66664	2.1991	1.5431	-1.0098	1.0992	2.1096	0.28522	-1.9281	-0.14583	0	-0.97693	-1.3924	-0.83698	-0.97606	-1.3684	0.85395
537	-180	-180	140	1.1	214.442	95.7923	95.9043	151.524	0	0	0	1.2382	0	0	1.9049	1.3503	0	-0.90717	0.62212	0	2.7601	1.2733	0.67209	2.2936	1.5269	-1.0076	1.2739	2.1924	0.29376	-0.86349	1.7791	0	-1.6057	0.40111	-0.84703	-1.6209	0.38892	0.83076
538	-180	-180	140	1.1	263.149	148.1	148.26	210.517	0	0	0	1.3605	0	0	2.3645	1.0363	0	-0.13121	1.0921	0	3.1346	0.6661	0.68029	2.7956	1.0506	-1.0084	2.138	2.0762	0.2828	0.57088	1.9253	0	-0.85785	1.4237	-0.82386	-0.89775	1.4329	0.78527
539	-180	-180	140	2.5	180	57.6111	81.587	106.334	0	0	0	1.172	0	0	1.9964	1.2696	0	-2.5	0	0	2.8422	1.1132	0.66675	2.3673	1.4027	-1.0169	1.3897	2.123	0.30543	-3.2854	0.74756	0	-2.2343	-0.47844	-0.92967	-2.2379	-0.48268	0.92855
540	-180	-180	140	2.5	90	50.5838	57.8626	113.259	0	0	0	1.1823	0	0	1.9032	1.3254	0	0	-2.5	0	2.7585	1.2328	0.66757	2.2708	1.4826	-1.0153	1.2426	2.1411	0.29842	-0.98938	-2.9395	0	0.55257	-2.4603	-0.92688	0.55024	-2.4568	0.92812
541	-180	-180	140	2.5	270	62.0337	67.3594	108.866	0	0	0	1.1698	0	0	2.2779	0.90769	0	0	2.5	0	3.0485	0.51572	0.66421	2.6719	0.94681	-1.0178	1.9131	1.8949	0.3116	0.70748	3.3257	0	-0.50295	2.3545	-0.9496	-0.65729	2.4737	0.862
542	-180	-180	140	2.5	116.36	48.2786	55.0236	110.769	0	0	0	1.1777	0	0	1.9131	1.3145	0	-1.11	-2.24	0	2.7674	1.2131	0.66718	2.2804	1.4685	-1.0158	1.2575	2.1339	0.29952	-2.0995	-1.8066	0	-0.69624	-2.6047	-0.92987	-0.69255	-2.5957	0.93171
543	-180	-180	140	2.5	243.64	45.8734	49.1555	109.148	0	0	0	1.1737	0	0	2.0468	1.1944	0	-1.11	2.24	0	2.8889	1.0045	0.66442	2.426	1.3147	-1.0167	1.4635	2.067	0.30152	-0.4774	3.12	0	-1.6054	1.9891	-0.92843	-1.6408	2.0123	0.91484
544	-180	-180	140	2.5	96.8508	48.9091	55.5366	111.999	0	0	0	1.1813	0	0	1.9039	1.3233	0	-0.29821	-2.4822	0	2.7591	1.2298	0.66746	2.2713	1.4803	-1.0154	1.2435	2.1392	0.2986	-1.3624	-2.6757	0	0.24859	-2.5646	-0.92824	0.24715	-2.5592	0.92954
545	-180	-180	140	2.5	145.558	53.7588	67.7112	109.492	0	0	0	1.1733	0	0	1.9447	1.2962	0	-2.0618	-1.4139	0	2.7962	1.173	0.66685	2.3126	1.4415	-1.0165	1.3066	2.128	0.30214	-2.5255	-0.44039	0	-1.939	-1.9475	-0.93207	-1.9211	-1.9384	0.9347
546	-180	-180	140	2.5	214.442	50.5225	59.1207	109.877	0	0	0	1.1738	0	0	1.9932	1.264	0	-2.0618	1.4139	0	2.8411	1.1128	0.66597	2.365	1.3998	-1.0166	1.3799	2.1142	0.30353	-1.9803	2.4939	0	-2.2795	0.90788	-0.92912	-2.2951	0.90855	0.92575
547	-180	-180	140	2.5	263.149	54.6732	58.4433	108.931	0	0	0	1.1708	0	0	2.2054	1.007	0	-0.29821	2.4822	0	3.0068	0.6828	0.66392	2.5967	1.0744	-1.0175	1.7587	1.9577	0.30774	0.41643	3.2995	0	-0.82444	2.3417	-0.93717	-0.92185	2.4191	0.88432
548	-180	-180	140	1.30503	180	51.2852	51.313	89.1936	0	0	0	1.221	0	0	1.8662	1.3683	0	-1.305	0	0	2.729	1.33	0.66848	2.2393	1.5453	-1.0139	1.1703	2.1621	0.28817	-1.8501	0.98193	0	-1.6984	-0.56747	-0.86409	-1.6907	-0.56169	0.87021
549	-180	-180	140	1.30503	90	43.4748	43.5524	121.024	0	0	0	1.2921	0	0	1.8864	1.346	0	0	-1.305	0	2.7526	1.3412	0.66645	2.2707	1.544	-1.0081	1.1712	2.1238	0.27857	-1.0425	-1.7045	0	0.44006	-1.7833	-0.87891	0.43799	-1.7812	0.88072
550	-180	-180	140	1.30503	270	87.4333	87.5236	137.539	0	0	0	1.3331	0	0	2.471	0.87544	0	0	1.305	0	3.1862	0.40536	0.67856	2.8929	0.79837	-1.0088	2.3973	1.9467	0.25763	0.83194	1.988	0	-0.62801	1.673	-0.85072	-0.65912	1.6922	0.81901
551	-180	-180	140	1.30503	116.36	9.78417	9.8499	82.2383	0	0	0	1.2417	0	0	1.8156	1.3427	0	-0.57945	-1.1693	0	2.6815	1.3492	0.66589	2.1928	1.5459	-1.0087	1.0828	2.1041	0.27993	-1.6698	-1.0811	0	-0.3023	-1.7859	-0.8705	-0.30536	-1.7772	0.87697
552	-180	-180	140	1.30503	243.64	22.8758	22.9607	103.216	0	0	0	1.2568	0	0	2.1427	1.1819	0	-0.57945	1.1693	0	2.9556	0.91858	0.67835	2.5694	1.2485	-1.0055	1.763	2.1653	0.28709	0.027455	2.0753	0	-1.2593	1.2432	-0.86505	-1.2779	1.2449	0.84981
553	-180	-180	140	1.30503	96.8508	26.7787	26.8523	107.072	0	0	0	1.2736	0	0	1.8617	1.3428	0	-0.15567	-1.2957	0	2.7279	1.3418	0.66612	2.2443	1.5435	-1.0079	1.1428	2.1174	0.27929	-1.2248	-1.579	0	0.26399	-1.803	-0.87498	0.26067	-1.7994	0.87823
554	-180	-180	140	1.30503	145.558	29.6011	29.6376	78.7407	0	0	0	1.226	0	0	1.8026	1.3512	0	-1.0763	-0.73808	0	2.6679	1.3536	0.66698	2.1752	1.5464	-1.0116	1.0616	2.1052	0.27918	-1.9981	-0.14316	0	-1.1321	-1.4338	-0.86294	-1.1274	-1.4137	0.87773
555	-180	-180	140	1.30503	214.442	27.9476	27.9855	89.4243	0	0	0	1.2275	0	0	1.9229	1.3414	0	-1.0763	0.73808	0	2.7792	1.2576	0.67025	2.3104	1.5082	-1.0094	1.2942	2.1867	0.29323	-0.99894	1.855	0	-1.6876	0.46436	-0.87082	-1.6968	0.45832	0.86212
556	-180	-180	140	1.30503	263.149	61.4778	61.5711	125.282	0	0	0	1.3055	0	0	2.3787	0.97495	0	-0.15567	1.2957	0	3.122	0.55499	0.6802	2.8079	0.93002	-1.0069	2.2367	2.0324	0.265	0.64473	2.0128	0	-0.80238	1.5955	-0.85441	-0.82796	1.6089	0.82992
557	-180	-180	140	2.29497	180	63.3706	83.0494	112.647	0	0	0	1.174	0	0	2.0049	1.2666	0	-2.295	0	0	2.8501	1.1065	0.66675	2.3765	1.3987	-1.0168	1.4027	2.1232	0.30583	-3.0176	0.81104	0	-2.1318	-0.53057	-0.92622	-2.1352	-0.53419	0.92477
558	-180	-180	140	2.29497	90	48.0878	49.432	116.251	0	0	0	1.1952	0	0	1.8492	1.3539	0	0	-2.295	0	2.7085	1.3026	0.66794	2.2152	1.5278	-1.014	1.1553	2.1442	0.29345	-0.99338	-2.7294	0	0.56354	-2.3367	-0.92095	0.5604	-2.3318	0.92306
559	-180	-180	140	2.29497	270	66.7057	69.0076	113.376	0	0	0	1.1759	0	0	2.3544	0.80675	0	0	2.295	0	3.0756	0.33535	0.66828	2.7534	0.80299	-1.0162	2.1382	1.8233	0.32716	0.84097	2.9791	0	-0.55526	2.3205	-0.93362	-0.64354	2.4195	0.86651
560	-180	-180	140	2.29497	116.36	44.5969	45.8318	112.253	0	0	0	1.1855	0	0	1.8583	1.3398	0	-1.019	-2.0563	0	2.7167	1.2769	0.66744	2.2233	1.5089	-1.0147	1.1694	2.1337	0.29491	-2.0301	-1.6734	0	-0.63846	-2.4739	-0.92322	-0.63503	-2.4637	0.92634
561	-180	-180	140	2.29497	243.64	41.8065	41.8739	110.039	0	0	0	1.1793	0	0	2.0678	1.1662	0	-1.019	2.0563	0	2.9073	0.96225	0.66401	2.4511	1.2827	-1.0161	1.5038	2.0507	0.30393	-0.38036	2.9327	0	-1.5604	1.8786	-0.92141	-1.5923	1.8986	0.90563
562	-180	-180	140	2.29497	96.8508	45.2279	46.2575	113.899	0	0	0	1.1926	0	0	1.8499	1.3503	0	-0.27376	-2.2786	0	2.709	1.2969	0.66779	2.2155	1.5235	-1.0141	1.1565	2.1409	0.29375	-1.335	-2.4946	0	0.27025	-2.4344	-0.92157	0.26823	-2.4277	0.92384
563	-180	-180	140	2.29497	145.558	55.2906	62.332	114.23	0	0	0	1.178	0	0	1.9011	1.3177	0	-1.8927	-1.298	0	2.7568	1.2249	0.66691	2.2666	1.4746	-1.016	1.2346	2.1288	0.29861	-2.4039	-0.34829	0	-1.8373	-1.8557	-0.92584	-1.8194	-1.8448	0.931
564	-180	-180	140	2.29497	214.442	50.0213	53.0883	113.411	0	0	0	1.1783	0	0	1.9962	1.2604	0	-1.8927	1.298	0	2.8452	1.1115	0.66557	2.3697	1.3978	-1.0162	1.3828	2.1115	0.30262	-1.8294	2.3807	0	-2.1755	0.81311	-0.92394	-2.1906	0.81324	0.91929
565	-180	-180	140	2.29497	263.149	55.6654	56.2919	112.091	0	0	0	1.1767	0	0	2.2644	0.93281	0	-0.27376	2.2786	0	3.0381	0.55064	0.66605	2.6614	0.97636	-1.0164	1.9125	1.9128	0.32247	0.52769	3.0081	0	-0.84076	2.2763	-0.92635	-0.90905	2.3438	0.87838
566	-180	-180	140	1.15328	180	85.3509	85.4106	121.39	0	0	0	1.2225	0	0	1.8566	1.3655	0	-1.1533	0	0	2.7192	1.3314	0.66846	2.2299	1.5504	-1.0125	1.1625	2.1596	0.29133	-1.7765	0.97567	0	-1.6127	-0.59033	-0.84288	-1.6028	-0.58173	0.85124
567	-180	-180	140	1.15328	90	103.856	103.959	178.658	0	0	0	1.3277	0	0	1.927	1.3411	0	0	-1.1533	0	2.7938	1.3328	0.66686	2.3148	1.5439	-1.0071	1.2179	2.1231	0.28026	-1.0564	-1.5725	0	0.39665	-1.7103	-0.86806	0.39346	-1.7089	0.86994
568	-180	-180	140	1.15328	270	142.434	142.534	192.146	0	0	0	1.3798	0	0	2.4617	0.93803	0	0	1.1533	0	3.2032	0.51047	0.67866	2.8884	0.91167	-1.0104	2.3094	1.9972	0.27283	0.7574	1.9353	0	-0.69028	1.5434	-0.82925	-0.7343	1.5601	0.78541
569	-180	-180	140	1.15328	116.36	56.609	56.703	124.887	0	0	0	1.2559	0	0	1.8364	1.3365	0	-0.51208	-1.0334	0	2.703	1.3398	0.66582	2.2168	1.5442	-1.0076	1.1114	2.1047	0.28197	-1.617	-1.0165	0	-0.24829	-1.6993	-0.85413	-0.25482	-1.6894	0.86263
570	-180	-180	140	1.15328	243.64	69.6952	69.8076	148.696	0	0	0	1.275	0	0	2.1397	1.1958	0	-0.51208	1.0334	0	2.9546	0.94078	0.67945	2.5672	1.2723	-1.0051	1.7545	2.1779	0.28818	0.050179	1.9787	0	-1.2332	1.142	-0.84653	-1.2575	1.1405	0.82519
571	-180	-180	140	1.53212	180	52.8858	52.8533	91.8318	0	0	0	1.2235	0	0	1.8769	1.3714	0	-1.5321	0	0	2.7403	1.3318	0.66842	2.2488	1.5456	-1.0151	1.1774	2.1627	0.28716	-1.9789	1.0021	0	-1.8342	-0.55525	-0.88817	-1.8303	-0.55296	0.89071
572	-180	-180	140	1.53212	90	18.578	18.591	97.4885	0	0	0	1.2637	0	0	1.8433	1.3563	0	0	-1.5321	0	2.7087	1.3604	0.66638	2.2213	1.5554	-1.009	1.1174	2.1248	0.27955	-1.0318	-1.9151	0	0.49618	-1.9023	-0.89145	0.49382	-1.8988	0.894
573	-180	-180	140	1.53212	270	63.6157	63.6494	114.691	0	0	0	1.2913	0	0	2.4777	0.82075	0	0	1.5321	0	3.1646	0.3115	0.67934	2.8928	0.70835	-1.0072	2.48	1.8938	0.25559	0.91638	2.078	0	-0.5817	1.8662	-0.87253	-0.6001	1.8888	0.8513
574	-180	-180	140	1.53212	116.36	0	0	75.1987	0	0	0	1.2293	0	0	1.7936	1.3532	0	-0.68029	-1.3728	0	2.6584	1.3637	0.66633	2.1658	1.5544	-1.0099	1.0527	2.1065	0.2801	-1.7524	-1.1932	0	-0.38116	-1.9338	-0.88833	-0.38171	-1.9249	0.89381
575	-180	-180	140	1.53212	243.64	10.6238	10.6299	90.9644	0	0	0	1.2381	0	0	2.1376	1.1652	0	-0.68029	1.3728	0	2.9534	0.90434	0.67565	2.559	1.2366	-1.0069	1.7384	2.1373	0.29329	-0.030756	2.2408	0	-1.3203	1.3922	-0.88503	-1.3359	1.3975	0.87335
576	-180	-180	140	2.06788	180	73.4571	85.1846	122.456	0	0	0	1.1805	0	0	2.0156	1.2698	0	-2.0679	0	0	2.861	1.1087	0.66692	2.3886	1.402	-1.0166	1.4167	2.1289	0.30587	-2.7857	0.8213	0	-1.9913	-0.56294	-0.91962	-1.9945	-0.5669	0.91751
577	-180	-180	140	2.06788	90	38.6094	38.5134	112.169	0	0	0	1.2159	0	0	1.8063	1.3724	0	0	-2.0679	0	2.6684	1.3623	0.66787	2.1725	1.564	-1.0121	1.0823	2.1389	0.2875	-1.0042	-2.4835	0	0.56385	-2.2008	-0.91292	0.56033	-2.1952	0.91583
578	-180	-180	140	2.06788	270	68.0608	68.0053	116.138	0	0	0	1.2001	0	0	2.4579	0.6956	0	0	2.0679	0	3.104	0.1328	0.67567	2.8579	0.60018	-1.0117	2.4779	1.7412	0.30945	1.0093	2.4226	0	-0.53089	2.3212	-0.91533	-0.55818	2.3921	0.87623
579	-180	-180	140	2.06788	116.36	33.5434	33.4391	106.204	0	0	0	1.1988	0	0	1.8015	1.361	0	-0.91817	-1.8529	0	2.663	1.3414	0.66761	2.1653	1.5479	-1.0131	1.0771	2.1257	0.28882	-1.948	-1.5197	0	-0.56763	-2.3172	-0.91471	-0.56489	-2.3064	0.91901
580	-180	-180	140	2.06788	243.64	33.0624	32.973	106.761	0	0	0	1.1925	0	0	2.0926	1.15	0	-0.91817	1.8529	0	2.9256	0.92582	0.66635	2.4861	1.2577	-1.0136	1.5763	2.06	0.30729	-0.26561	2.7184	0	-1.4921	1.7362	-0.91323	-1.517	1.7511	0.89888
581	-180	-180	140	2.44672	180	58.8431	81.9157	107.705	0	0	0	1.1724	0	0	1.9983	1.2688	0	-2.4467	0	0	2.844	1.1115	0.66675	2.3693	1.4017	-1.0169	1.3926	2.123	0.30554	-3.2051	0.77545	0	-2.2121	-0.49614	-0.92903	-2.2156	-0.50005	0.92786
582	-180	-180	140	2.44672	90	50.2547	55.8141	114.313	0	0	0	1.1849	0	0	1.8908	1.3322	0	0	-2.4467	0	2.7472	1.2489	0.66766	2.2581	1.4931	-1.015	1.2226	2.1423	0.29733	-0.99032	-2.885	0	0.5557	-2.4281	-0.92586	0.55317	-2.4243	0.92729
583	-180	-180	140	2.44672	270	63.2328	67.8335	110.042	0	0	0	1.1707	0	0	2.2945	0.88488	0	0	2.4467	0	3.0555	0.47547	0.66491	2.6896	0.91618	-1.0176	1.9594	1.8788	0.31597	0.73336	3.2493	0	-0.51941	2.3387	-0.94641	-0.65828	2.4529	0.86231
584	-180	-180	140	2.44672	116.36	47.6651	52.8094	111.447	0	0	0	1.1792	0	0	1.9011	1.3203	0	-1.0864	-2.1923	0	2.7565	1.2273	0.66723	2.268	1.4775	-1.0155	1.2384	2.1343	0.29854	-2.0819	-1.7723	0	-0.68093	-2.5706	-0.92841	-0.67731	-2.5613	0.93055
585	-180	-180	140	2.44672	243.64	45.1343	47.324	109.608	0	0	0	1.1748	0	0	2.0525	1.1869	0	-1.0864	2.1923	0	2.8938	0.99318	0.66428	2.4326	1.3061	-1.0166	1.4739	2.0626	0.30209	-0.4517	3.071	0	-1.5945	1.9602	-0.92687	-1.6288	1.9825	0.91268
586	-180	-60	-180	1.8	180	77.2823	77.1911	114.613	0	0	0	1.2241	0	0	1.8988	1.3921	0	-1.8	0	0	2.9806	1.2484	0	1.591	1.9437	-0.8927	1.5909	1.9446	0.89214	-1.962	-0.5347	-0.92612	-1.9628	-0.58858	0.89246	-2.212	1.006	0.028447
587	-180	-60	-180	1.8	90	26.1783	26.1298	100.015	0	0	0	1.2388	0	0	1.8043	1.3828	0	0	-1.8	0	2.8908	1.3071	0	1.4728	1.9263	-0.88844	1.4728	1.9259	0.88865	0.52719	-2.0441	-0.91312	0.55229	-2.0446	0.89772	-1.021	-2.1857	0.013037
588	-180	-60	-180	1.8	270	61.8274	61.792	111.75	0	0	0	1.2446	0	0	2.4094	0.8652	0	0	1.8	0	3.2707	0.19841	0	2.4609	1.5002	-0.89107	2.4664	1.4916	0.897	-0.52336	2.1101	-0.90648	-0.61119	2.1158	0.84889	0.97271	2.231	0.060458
589	-180	-60	-180	1.8	116.36	17.1827	17.1204	88.8755	0	0	0	1.2138	0	0	1.7748	1.3778	0	-0.79923	-1.6128	0	2.8609	1.3024	0	1.4366	1.915	-0.88864	1.4366	1.915	0.8886	-0.46759	-2.1181	-0.90328	-0.47661	-2.1127	0.90954	-1.8499	-1.3464	-0.005881
590	-180	-60	-180	1.8	243.64	19.9489	19.9007	96.4149	0	0	0	1.2145	0	0	2.0559	1.2101	0	-0.79923	1.6128	0	3.0954	0.88812	0	1.8631	1.8123	-0.89149	1.8651	1.8108	0.8929	-1.3817	1.5945	-0.91799	-1.4441	1.5594	0.87349	-0.10861	2.4473	0.041109
591	-180	-60	-180	1.8	96.8508	19.2141	19.1589	94.3428	0	0	0	1.2292	0	0	1.7968	1.3785	0	-0.21471	-1.7871	0	2.8829	1.2999	0	1.4653	1.9214	-0.88842	1.4653	1.9211	0.88862	0.2787	-2.1002	-0.91319	0.30571	-2.1034	0.89675	-1.279	-2.0147	0.014703
592	-180	-60	-180	1.8	145.558	43.8337	43.7688	98.5071	0	0	0	1.2095	0	0	1.7532	1.3901	0	-1.4845	-1.018	0	2.841	1.3269	0	1.4	1.9151	-0.88953	1.3996	1.916	0.88886	-1.4935	-1.6458	-0.88796	-1.5111	-1.5857	0.92682	-2.1669	-0.18296	-0.034041
593	-180	-60	-180	1.8	214.442	35.8591	35.7902	101.532	0	0	0	1.2066	0	0	1.9578	1.3115	0	-1.4845	1.018	0	3.0251	1.0975	0	1.694	1.8849	-0.89211	1.694	1.8864	0.89117	-1.9057	0.65515	-0.93094	-1.9495	0.57504	0.87291	-1.399	2.1046	0.048072
594	-180	-60	-180	1.8	263.149	42.9262	42.8973	104.379	0	0	0	1.2327	0	0	2.3081	0.98143	0	-0.21471	1.7871	0	3.2328	0.40654	0	2.2897	1.6145	-0.89219	2.2942	1.6086	0.8965	-0.7709	2.021	-0.90815	-0.84491	2.0143	0.86066	0.71387	2.318	0.047814
595	-180	-60	-180	1.1	180	111.981	112.059	145.044	0	0	0	1.2249	0	0	1.8365	1.3807	0	-1.1	0	0	2.9195	1.2654	0	1.5255	1.9355	-0.89072	1.5251	1.9352	0.8907	-1.5586	-0.51713	-0.89569	-1.604	-0.67831	0.76969	-1.7527	0.97331	0.065276
596	-180	-60	-180	1.1	90	141.857	141.975	213.222	0	0	0	1.3492	0	0	1.9423	1.3513	0	0	-1.1	0	3.0275	1.2495	0	1.6332	1.9131	-0.88794	1.6309	1.9193	0.8836	0.46139	-1.7129	-0.79916	0.2631	-1.6597	0.92809	-1.0639	-1.5244	-0.087482
597	-180	-60	-180	1.1	270	172.203	172.317	221.936	0	0	0	1.4131	0	0	2.361	1.0761	0	0	1.1	0	3.3319	0.58321	0	2.2711	1.7478	-0.87027	2.3073	1.7149	0.89623	-0.52781	1.5542	-0.9142	-0.96327	1.4799	0.57957	0.67092	1.8995	0.32829
598	-180	-60	-180	1.1	116.36	89.8674	89.9941	153.302	0	0	0	1.2635	0	0	1.8357	1.3479	0	-0.48842	-0.98562	0	2.9222	1.2647	0	1.5141	1.9066	-0.88517	1.5146	1.904	0.88691	-0.25637	-1.651	-0.87184	-0.1995	-1.6879	0.82525	-1.5991	-0.99986	0.030998
599	-180	-60	-180	1.1	243.64	99.313	99.4376	176.122	0	0	0	1.2831	0	0	2.0612	1.2563	0	-0.48842	0.98562	0	3.1	0.93298	0	1.8909	1.8777	-0.88786	1.8975	1.882	0.88619	-1.1477	1.1485	-0.89802	-1.3293	1.0708	0.74214	0.054373	1.9449	0.10009
600	-180	-60	-180	1.1	96.8508	119.867	120.031	192.8	0	0	0	1.3165	0	0	1.902	1.3487	0	-0.13121	-1.0921	0	2.9878	1.254	0	1.5894	1.9101	-0.88703	1.5885	1.9143	0.88419	0.27639	-1.7095	-0.8285	0.18634	-1.6799	0.8909	-1.2114	-1.4191	-0.041665
601	-180	-60	-180	1.1	145.558	96.9817	97.0797	139.869	0	0	0	1.2343	0	0	1.8067	1.3578	0	-0.90717	-0.62212	0	2.8932	1.2735	0	1.4784	1.9091	-0.88683	1.479	1.9058	0.88894	-1.0032	-1.3135	-0.89357	-0.9454	-1.4516	0.7862	-1.9277	-0.15014	0.064569
602	-180	-60	-180	1.1	214.442	96.1221	96.2337	149.802	0	0	0	1.2368	0	0	1.8767	1.3723	0	-0.90717	0.62212	0	2.9524	1.2114	0	1.6014	1.9481	-0.88942	1.6005	1.9526	0.88616	-1.5635	0.4492	-0.88993	-1.6598	0.35107	0.7847	-0.85628	1.7782	0.059443
603	-180	-60	-180	1.1	263.149	144.832	144.998	206.488	0	0	0	1.3635	0	0	2.2763	1.1204	0	-0.13121	1.0921	0	3.2638	0.66252	0	2.1774	1.7723	-0.88127	2.2008	1.7641	0.88944	-0.70725	1.4668	-0.91319	-1.0392	1.4003	0.64457	0.54277	1.9214	0.21997
604	-180	-60	-180	2.5	180	58.3116	82.3465	103.737	0	0	0	1.1713	0	0	1.993	1.2822	0	-2.5	0	0	3.0441	1.0066	0	1.7429	1.8542	-0.89368	1.743	1.8539	0.89388	-2.24	-0.52351	-0.90674	-2.2445	-0.44388	0.94962	-3.274	0.75846	-0.033931
605	-180	-60	-180	2.5	90	51.4979	58.9094	110.645	0	0	0	1.1809	0	0	1.9021	1.3365	0	0	-2.5	0	2.9707	1.137	0	1.6171	1.8946	-0.89249	1.6171	1.8945	0.89257	0.53946	-2.4556	-0.93438	0.56238	-2.4528	0.92053	-0.986	-2.947	0.012614
606	-180	-60	-180	2.5	270	61.2264	68.8248	105.614	0	0	0	1.1738	0	0	2.2657	0.96155	0	0	2.5	0	3.2009	0.40336	0	2.1927	1.5824	-0.89333	2.1936	1.5796	0.8952	-0.54192	2.4887	-0.93863	-0.62067	2.4858	0.88827	0.86758	3.1467	0.039759
607	-180	-60	-180	2.5	116.36	49.1973	56.0922	108.113	0	0	0	1.1764	0	0	1.9113	1.3263	0	-1.11	-2.24	0	2.9778	1.1168	0	1.6295	1.8855	-0.89269	1.6295	1.8855	0.89269	-0.69031	-2.6007	-0.92877	-0.69652	-2.5972	0.93291	-2.0998	-1.8073	-0.004097
608	-180	-60	-180	2.5	243.64	46.541	50.2269	106.864	0	0	0	1.1744	0	0	2.0225	1.2282	0	-1.11	2.24	0	3.0685	0.93079	0	1.783	1.8081	-0.89211	1.7833	1.8077	0.89236	-1.6148	2.0417	-0.93596	-1.6504	2.0173	0.91018	-0.39946	3.0571	0.024487
609	-180	-60	-180	2.5	96.8508	49.8345	56.6017	109.373	0	0	0	1.18	0	0	1.9026	1.3347	0	-0.29821	-2.4822	0	2.971	1.1342	0	1.6177	1.8928	-0.8925	1.6178	1.8927	0.89255	0.23668	-2.5586	-0.93566	0.25977	-2.5585	0.92204	-1.3614	-2.6808	0.013094
610	-180	-60	-180	2.5	145.558	54.5948	68.7582	106.916	0	0	0	1.1722	0	0	1.9423	1.3087	0	-2.0618	-1.4139	0	3.0031	1.073	0	1.6716	1.8719	-0.89338	1.6716	1.872	0.8933	-1.9259	-1.9649	-0.92009	-1.9309	-1.9195	0.94641	-2.5259	-0.44088	-0.024744
611	-180	-60	-180	2.5	214.442	51.2955	60.0108	107.352	0	0	0	1.1733	0	0	1.9887	1.2772	0	-2.0618	1.4139	0	3.0419	1.0087	0	1.735	1.8492	-0.89302	1.735	1.8492	0.893	-2.29	0.91792	-0.9321	-2.296	0.90392	0.92296	-1.9635	2.4924	0.008384
612	-180	-60	-180	2.5	263.149	54.3006	59.2822	106.206	0	0	0	1.1741	0	0	2.185	1.0571	0	-0.29821	2.4822	0	3.1679	0.58961	0	2.0493	1.6683	-0.89275	2.0503	1.6659	0.8944	-0.84028	2.4549	-0.93781	-0.91081	2.4416	0.89264	0.56049	3.1397	0.03888
613	-180	-60	-180	1.30503	180	52.1501	52.1818	87.5219	0	0	0	1.2211	0	0	1.8483	1.3897	0	-1.305	0	0	2.9319	1.2716	0	1.5316	1.9385	-0.89166	1.5316	1.9386	0.89156	-1.6843	-0.5189	-0.89877	-1.7041	-0.60949	0.83295	-1.8499	0.98097	0.041687
614	-180	-60	-180	1.30503	90	44.8248	44.9067	119.307	0	0	0	1.2921	0	0	1.8808	1.3592	0	0	-1.305	0	2.9665	1.2679	0	1.5613	1.914	-0.8874	1.5609	1.9164	0.88594	0.48847	-1.7921	-0.84605	0.38648	-1.7721	0.91085	-1.0415	-1.7041	-0.049245
615	-180	-60	-180	1.30503	270	84.9206	84.9969	134.473	0	0	0	1.3372	0	0	2.3944	0.98445	0	0	1.305	0	3.3196	0.41029	0	2.3714	1.6476	-0.87638	2.3923	1.6213	0.89625	-0.5225	1.696	-0.90499	-0.7991	1.6644	0.71054	0.79593	1.9964	0.21541
616	-180	-60	-180	1.30503	116.36	11.1999	11.2697	80.3794	0	0	0	1.241	0	0	1.8051	1.3575	0	-0.57945	-1.1693	0	2.892	1.2842	0	1.4726	1.9052	-0.88647	1.4728	1.9046	0.88684	-0.31215	-1.7752	-0.88082	-0.29221	-1.7878	0.86568	-1.6698	-1.0825	0.012026
617	-180	-60	-180	1.30503	243.64	21.2015	21.2643	99.9043	0	0	0	1.2559	0	0	2.0683	1.2408	0	-0.57945	1.1693	0	3.1032	0.90542	0	1.9023	1.8594	-0.88875	1.9072	1.8595	0.8897	-1.21	1.2722	-0.89942	-1.3258	1.2174	0.80974	0.029959	2.0729	0.070236
618	-180	-60	-180	1.30503	96.8508	28.1547	28.2319	105.22	0	0	0	1.2733	0	0	1.8552	1.356	0	-0.15567	-1.2957	0	2.9413	1.2696	0	1.5336	1.9103	-0.88694	1.5334	1.9116	0.88608	0.28412	-1.8069	-0.86191	0.23899	-1.7951	0.89132	-1.2247	-1.5788	-0.022765
619	-180	-60	-180	1.30503	145.558	30.8992	30.9391	77.0179	0	0	0	1.2256	0	0	1.7846	1.3708	0	-1.0763	-0.73808	0	2.8724	1.3009	0	1.4411	1.9089	-0.88763	1.4415	1.9077	0.88848	-1.1374	-1.4009	-0.8869	-1.1185	-1.4489	0.85169	-1.999	-0.14506	0.025201
620	-180	-60	-180	1.30503	214.442	28.5661	28.609	87.3448	0	0	0	1.2267	0	0	1.8986	1.3647	0	-1.0763	0.73808	0	2.9736	1.196	0	1.624	1.9374	-0.89113	1.6239	1.9406	0.88902	-1.658	0.50503	-0.90278	-1.7248	0.42372	0.82871	-0.99331	1.8538	0.049889
621	-180	-60	-180	1.30503	263.149	58.9788	59.0774	121.377	0	0	0	1.3077	0	0	2.302	1.0637	0	-0.15567	1.2957	0	3.2601	0.54671	0	2.2478	1.7128	-0.88376	2.2634	1.7022	0.89267	-0.7195	1.6169	-0.90326	-0.93079	1.58	0.75125	0.62325	2.0229	0.14673
622	-180	-60	-180	2.29497	180	64.0526	83.7342	110.078	0	0	0	1.1734	0	0	2.0012	1.2794	0	-2.295	0	0	3.0511	0.99938	0	1.7541	1.8527	-0.8938	1.7541	1.8526	0.89381	-2.1367	-0.53411	-0.9251	-2.1368	-0.53285	0.92584	-3.0111	0.81666	-0.00056768
623	-180	-60	-180	2.29497	90	49.1984	50.6235	113.741	0	0	0	1.1936	0	0	1.8472	1.366	0	0	-2.295	0	2.9245	1.2174	0	1.5403	1.9152	-0.89132	1.5403	1.9149	0.89152	0.53994	-2.3329	-0.9352	0.58345	-2.328	0.90864	-0.99085	-2.7348	0.023749
624	-180	-60	-180	2.29497	270	64.5021	66.8211	110.619	0	0	0	1.1798	0	0	2.327	0.87719	0	0	2.295	0	3.2171	0.24996	0	2.3098	1.5023	-0.89389	2.3122	1.4967	0.89776	-0.53817	2.4404	-0.93214	-0.62648	2.4428	0.87476	0.94998	2.8048	0.049664
625	-180	-60	-180	2.29497	116.36	45.7059	47.0317	109.626	0	0	0	1.1841	0	0	1.8556	1.3522	0	-1.019	-2.0563	0	2.9308	1.1903	0	1.5519	1.9021	-0.89166	1.5519	1.9021	0.89165	-0.63061	-2.4706	-0.9214	-0.64086	-2.4647	0.92831	-2.0303	-1.674	-0.006776
626	-180	-60	-180	2.29497	243.64	42.2954	42.4673	107.669	0	0	0	1.1805	0	0	2.0356	1.2079	0	-1.019	2.0563	0	3.0795	0.9024	0	1.8043	1.7924	-0.892	1.8049	1.7918	0.89252	-1.5563	1.9288	-0.93192	-1.6034	1.8979	0.89803	-0.3138	2.8788	0.032233
627	-180	-60	-180	2.29497	96.8508	46.3485	47.4548	111.353	0	0	0	1.1912	0	0	1.8477	1.3624	0	-0.27376	-2.2786	0	2.9246	1.2116	0	1.5411	1.9117	-0.89138	1.5412	1.9115	0.89148	0.25123	-2.4277	-0.93363	0.28839	-2.4282	0.91156	-1.334	-2.4985	0.020902
628	-180	-60	-180	2.29497	145.558	56.2636	63.5102	111.674	0	0	0	1.1766	0	0	1.8984	1.3305	0	-1.8927	-1.298	0	2.9671	1.1323	0	1.6092	1.8858	-0.89274	1.6091	1.8862	0.89248	-1.8238	-1.8853	-0.90645	-1.8325	-1.8137	0.94947	-2.4036	-0.34889	-0.038797
629	-180	-60	-180	2.29497	214.442	50.8468	53.9977	110.916	0	0	0	1.178	0	0	1.9907	1.2743	0	-1.8927	1.298	0	3.045	1.0092	0	1.7374	1.8477	-0.89273	1.7374	1.8479	0.89257	-2.1777	0.83804	-0.93611	-2.1969	0.7942	0.90684	-1.8163	2.3795	0.026126
630	-180	-60	-180	2.29497	263.149	54.182	54.9684	109.109	0	0	0	1.1806	0	0	2.2345	0.99581	0	-0.27376	2.2786	0	3.1899	0.47434	0	2.1413	1.6146	-0.89368	2.1435	1.6106	0.89654	-0.82595	2.3765	-0.92936	-0.89906	2.366	0.88281	0.63983	2.8533	0.042612
631	-180	-60	-180	1.15328	180	86.1165	86.1803	119.919	0	0	0	1.2229	0	0	1.8403	1.3835	0	-1.1533	0	0	2.9234	1.2666	0	1.5277	1.9365	-0.89103	1.5275	1.9362	0.89106	-1.5892	-0.51739	-0.89614	-1.6261	-0.65269	0.79162	-1.776	0.97356	0.0566
632	-180	-60	-180	1.15328	90	104.961	105.066	177.365	0	0	0	1.3288	0	0	1.9226	1.3531	0	0	-1.1533	0	3.0079	1.2533	0	1.6105	1.913	-0.88759	1.6091	1.9178	0.88445	0.46936	-1.7307	-0.81296	0.30117	-1.6883	0.92207	-1.0551	-1.5706	-0.076735
633	-180	-60	-180	1.15328	270	138.923	139.023	188.634	0	0	0	1.3858	0	0	2.3722	1.0449	0	0	1.1533	0	3.3286	0.52462	0	2.304	1.7153	-0.87153	2.3345	1.6833	0.89624	-0.52569	1.5874	-0.91051	-0.91001	1.5276	0.62315	0.70818	1.9254	0.29483
634	-180	-60	-180	1.15328	116.36	57.8868	57.9847	123.352	0	0	0	1.2556	0	0	1.8263	1.3502	0	-0.51208	-1.0334	0	2.9129	1.2698	0	1.5013	1.9055	-0.88562	1.5017	1.9037	0.88678	-0.26986	-1.6811	-0.87404	-0.22612	-1.7094	0.83895	-1.6166	-1.0193	0.024673
635	-180	-60	-180	1.15328	243.64	67.7654	67.8623	145.429	0	0	0	1.274	0	0	2.0642	1.2516	0	-0.51208	1.0334	0	3.1012	0.9229	0	1.8965	1.8727	-0.88797	1.9026	1.8755	0.8873	-1.1626	1.1792	-0.89739	-1.3223	1.1091	0.76461	0.050554	1.9763	0.090699
636	-180	-60	-180	1.53212	180	53.8072	53.7784	90.009	0	0	0	1.2234	0	0	1.8585	1.3954	0	-1.5321	0	0	2.9428	1.2771	0	1.5386	1.9413	-0.89204	1.5386	1.9417	0.8918	-1.8279	-0.52455	-0.90856	-1.8357	-0.58323	0.86956	-1.9792	1.0016	0.029712
637	-180	-60	-180	1.53212	90	20.0463	20.0628	95.4055	0	0	0	1.2632	0	0	1.8373	1.3704	0	0	-1.5321	0	2.9238	1.2916	0	1.5098	1.919	-0.88768	1.5097	1.9196	0.88735	0.51003	-1.9015	-0.88339	0.48063	-1.8982	0.90167	-1.0318	-1.9151	-0.014764
638	-180	-60	-180	1.53212	270	61.5942	61.6133	110.963	0	0	0	1.2936	0	0	2.4108	0.92776	0	0	1.5321	0	3.3028	0.30296	0	2.433	1.5774	-0.88421	2.4451	1.5612	0.89605	-0.52231	1.876	-0.90467	-0.69087	1.8693	0.792	0.89529	2.0987	0.12569
639	-180	-60	-180	1.53212	116.36	1.51018	1.51384	73.0192	0	0	0	1.2283	0	0	1.7833	1.3688	0	-0.68029	-1.3728	0	2.8704	1.3017	0	1.4443	1.9093	-0.88741	1.4444	1.9092	0.88742	-0.38116	-1.9285	-0.89155	-0.37985	-1.9293	0.89061	-1.7525	-1.1939	0.000831
640	-180	-60	-180	1.53212	243.64	9.22473	9.22248	87.7667	0	0	0	1.2371	0	0	2.0654	1.2265	0	-0.68029	1.3728	0	3.1018	0.89498	0	1.8912	1.8386	-0.89019	1.8945	1.8371	0.89186	-1.2872	1.4176	-0.90749	-1.3679	1.3758	0.84856	-0.021687	2.2344	0.051633
641	-180	-60	-180	2.06788	180	74.1217	85.8388	120.008	0	0	0	1.18	0	0	2.011	1.2833	0	-2.0679	0	0	3.0611	1.0025	0	1.766	1.8576	-0.89404	1.766	1.8583	0.89359	-1.9956	-0.53935	-0.93418	-1.9935	-0.59021	0.90252	-2.7827	0.82352	0.022868
642	-180	-60	-180	2.06788	90	39.9642	39.8718	109.834	0	0	0	1.2146	0	0	1.8014	1.3865	0	0	-2.0679	0	2.8855	1.2898	0	1.4746	1.9286	-0.88975	1.4747	1.9281	0.89007	0.53677	-2.1969	-0.92972	0.58713	-2.1932	0.89891	-1.0026	-2.4866	0.027016
643	-180	-60	-180	2.06788	270	64.8593	64.801	113.375	0	0	0	1.2004	0	0	2.3888	0.81872	0	0	2.0679	0	3.2362	0.13452	0	2.4343	1.4436	-0.89526	2.4366	1.439	0.89832	-0.52511	2.3543	-0.90951	-0.57484	2.3605	0.87711	1.0066	2.4326	0.031559
644	-180	-60	-180	2.06788	116.36	34.8995	34.7989	103.709	0	0	0	1.1975	0	0	1.7949	1.3756	0	-0.91817	-1.8529	0	2.8778	1.2693	0	1.4672	1.915	-0.89017	1.4672	1.915	0.89015	-0.55907	-2.3148	-0.91257	-0.57177	-2.3072	0.92123	-1.9481	-1.5202	-0.008374
645	-180	-60	-180	2.06788	243.64	32.9399	32.8581	104.125	0	0	0	1.1933	0	0	2.0457	1.2015	0	-0.91817	1.8529	0	3.0877	0.88834	0	1.8306	1.7934	-0.89199	1.8317	1.7923	0.89291	-1.4779	1.7782	-0.9262	-1.5319	1.7451	0.88779	-0.21689	2.6787	0.036273
646	-180	-60	-180	2.44672	180	59.5386	82.6537	105.126	0	0	0	1.1717	0	0	1.9949	1.2815	0	-2.4467	0	0	3.0456	1.0048	0	1.7454	1.8538	-0.89371	1.7454	1.8535	0.89386	-2.2177	-0.52723	-0.91319	-2.2205	-0.47379	0.94282	-3.1948	0.78488	-0.02342
647	-180	-60	-180	2.44672	90	51.2097	56.8975	111.717	0	0	0	1.1834	0	0	1.8897	1.3434	0	0	-2.4467	0	2.9604	1.1552	0	1.5998	1.8996	-0.89224	1.5998	1.8994	0.89234	0.53988	-2.4237	-0.9351	0.56813	-2.4203	0.91799	-0.98719	-2.8919	0.015484
648	-180	-60	-180	2.44672	270	62.1234	68.323	106.949	0	0	0	1.1748	0	0	2.2793	0.94193	0	0	2.4467	0	3.2051	0.36833	0	2.2179	1.5642	-0.89333	2.2191	1.5606	0.89577	-0.54208	2.4719	-0.93891	-0.6292	2.4699	0.88273	0.88573	3.0672	0.04493
649	-180	-60	-180	2.44672	116.36	48.6229	53.9095	108.807	0	0	0	1.178	0	0	1.8993	1.3321	0	-1.0864	-2.1923	0	2.9678	1.1328	0	1.6129	1.8894	-0.89247	1.6129	1.8894	0.89247	-0.67456	-2.5668	-0.92714	-0.68174	-2.5627	0.93194	-2.0822	-1.773	-0.004735
650	-180	-60	-180	2.44672	243.64	45.7628	48.2925	107.331	0	0	0	1.1755	0	0	2.0262	1.2227	0	-1.0864	2.1923	0	3.0715	0.9227	0	1.7889	1.8037	-0.89208	1.7892	1.8034	0.89239	-1.6	2.0125	-0.93533	-1.639	1.9862	0.90713	-0.37637	3.0101	0.026783
651	-180	-60	-60	1.8	180	77.2823	77.1911	114.613	0	0	0	1.2241	0	0	1.8988	1.3921	0	-1.8	0	0	1.5923	1.9429	-0.89365	1.5894	1.9454	0.89112	2.9805	1.2485	0.0018823	-1.962	-0.5347	-0.92612	-1.9628	-0.58858	0.89245	-2.212	1.006	0.028451
652	-180	-60	-60	1.8	90	26.1783	26.1298	100.015	0	0	0	1.2388	0	0	1.8043	1.3828	0	0	-1.8	0	1.4726	1.9264	-0.88829	1.4731	1.9258	0.88883	2.8908	1.3071	-0.00034909	0.52719	-2.0441	-0.91312	0.55229	-2.0446	0.89772	-1.021	-2.1857	0.013035
653	-180	-60	-60	1.8	270	61.8183	61.7847	111.741	0	0	0	1.2446	0	0	2.4093	0.86529	0	0	1.8	0	2.4515	1.5249	-0.87356	2.4757	1.4665	0.91338	3.2704	0.19895	-0.0313	-0.52286	2.1132	-0.90561	-0.61372	2.112	0.84857	0.97212	2.2314	0.066892
654	-180	-60	-60	1.8	116.36	17.1827	17.1203	88.8755	0	0	0	1.2138	0	0	1.7748	1.3778	0	-0.79923	-1.6128	0	1.4384	1.9141	-0.88986	1.4347	1.916	0.88731	2.8609	1.3025	0.0022162	-0.4676	-2.1181	-0.90328	-0.47654	-2.1127	0.90953	-1.8499	-1.3464	-0.005828
655	-180	-60	-60	1.8	243.64	19.9476	19.8995	96.4137	0	0	0	1.2145	0	0	2.0559	1.2101	0	-0.79923	1.6128	0	1.8558	1.8183	-0.88582	1.8726	1.8046	0.89867	3.0953	0.88813	-0.011644	-1.3818	1.595	-0.91788	-1.4441	1.5587	0.87345	-0.10866	2.4473	0.042047
656	-180	-60	-60	1.8	96.8508	19.2141	19.1589	94.3428	0	0	0	1.2292	0	0	1.7968	1.3785	0	-0.21471	-1.7871	0	1.4655	1.9213	-0.88857	1.4651	1.9212	0.88848	2.8829	1.2999	0.00019727	0.2787	-2.1002	-0.91319	0.30571	-2.1034	0.89675	-1.279	-2.0147	0.014704
657	-180	-60	-60	1.8	145.558	43.8334	43.7685	98.5068	0	0	0	1.2095	0	0	1.7532	1.3901	0	-1.4845	-1.018	0	1.4044	1.9129	-0.89252	1.3947	1.9182	0.8856	2.841	1.3271	0.0057551	-1.4936	-1.6459	-0.88791	-1.511	-1.5857	0.92688	-2.1669	-0.18295	-0.034016
658	-180	-60	-60	1.8	214.442	35.8591	35.7903	101.532	0	0	0	1.2066	0	0	1.9578	1.3115	0	-1.4845	1.018	0	1.6934	1.8854	-0.89157	1.6946	1.8859	0.89166	3.0251	1.0975	-0.00062223	-1.9057	0.65516	-0.93094	-1.9495	0.57504	0.87291	-1.399	2.1046	0.048083
659	-180	-60	-60	1.8	263.149	42.9224	42.895	104.375	0	0	0	1.2327	0	0	2.3079	0.98149	0	-0.21471	1.7871	0	2.2765	1.6371	-0.87533	2.3062	1.5864	0.91188	3.2326	0.40731	-0.029725	-0.77081	2.024	-0.90737	-0.84702	2.0105	0.86022	0.71324	2.3185	0.054229
660	-180	-60	-60	1.1	180	111.981	112.059	145.044	0	0	0	1.2249	0	0	1.8365	1.3807	0	-1.1	0	0	1.5222	1.9375	-0.88831	1.5284	1.9332	0.89306	2.9195	1.2654	-0.0037662	-1.5585	-0.51713	-0.8957	-1.6041	-0.67829	0.7697	-1.7527	0.97333	0.065188
661	-180	-60	-60	1.1	90	141.857	141.975	213.222	0	0	0	1.3492	0	0	1.9422	1.3513	0	0	-1.1	0	1.6308	1.9146	-0.88609	1.6329	1.9179	0.88527	3.0275	1.2497	-0.0019386	0.46139	-1.7129	-0.79915	0.26312	-1.6597	0.92809	-1.0639	-1.5244	-0.087471
662	-180	-60	-60	1.1	270	172.186	172.299	221.827	0	0	0	1.4133	0	0	2.3598	1.0782	0	0	1.1	0	2.2709	1.7434	-0.87576	2.3157	1.7158	0.89644	3.3297	0.58307	-0.022369	-0.52794	1.5537	-0.91442	-0.96299	1.4801	0.57978	0.67111	1.8996	0.32748
663	-180	-60	-60	1.1	116.36	89.8674	89.9941	153.302	0	0	0	1.2635	0	0	1.8357	1.3479	0	-0.48842	-0.98562	0	1.5163	1.9055	-0.8867	1.5125	1.9051	0.8854	2.9222	1.2646	0.0022872	-0.25637	-1.651	-0.87184	-0.19951	-1.6878	0.82526	-1.5991	-0.99985	0.031008
664	-180	-60	-60	1.1	243.64	99.3151	99.4398	176.101	0	0	0	1.283	0	0	2.0611	1.2563	0	-0.48842	0.98562	0	1.8691	1.8985	-0.86837	1.9175	1.8616	0.90387	3.0996	0.93382	-0.032092	-1.1479	1.1493	-0.8977	-1.3294	1.0699	0.74214	0.054092	1.9448	0.10326
665	-180	-60	-60	1.1	96.8508	119.867	120.031	192.801	0	0	0	1.3165	0	0	1.902	1.3487	0	-0.13121	-1.0921	0	1.5883	1.9107	-0.88617	1.5893	1.9137	0.88495	2.9878	1.2541	-0.00079082	0.27639	-1.7095	-0.8285	0.18635	-1.6799	0.8909	-1.2114	-1.4191	-0.041655
666	-180	-60	-60	1.1	145.558	96.9818	97.0799	139.869	0	0	0	1.2343	0	0	1.8067	1.3578	0	-0.90717	-0.62212	0	1.4814	1.9074	-0.88901	1.4761	1.9074	0.88682	2.8932	1.2735	0.0031339	-1.0032	-1.3136	-0.89357	-0.94535	-1.4516	0.7862	-1.9277	-0.15015	0.064633
667	-180	-60	-60	1.1	214.442	96.1239	96.2352	149.78	0	0	0	1.2368	0	0	1.8768	1.3723	0	-0.90717	0.62212	0	1.5888	1.9565	-0.8798	1.6127	1.9443	0.8953	2.9523	1.2116	-0.01479	-1.5635	0.44923	-0.88991	-1.6597	0.35117	0.78481	-0.85625	1.7782	0.059634
668	-180	-60	-60	1.1	263.149	144.812	144.976	206.468	0	0	0	1.3635	0	0	2.2752	1.1216	0	-0.13121	1.0921	0	2.1661	1.7851	-0.87156	2.2129	1.7509	0.90025	3.2624	0.66361	-0.027981	-0.70713	1.4679	-0.91276	-1.0398	1.3994	0.64432	0.54222	1.921	0.22351
669	-180	-60	-60	2.5	180	58.3116	82.3464	103.737	0	0	0	1.1713	0	0	1.993	1.2822	0	-2.5	0	0	1.7448	1.8527	-0.89515	1.741	1.8554	0.89238	3.0441	1.0066	0.002574	-2.24	-0.5235	-0.90673	-2.2445	-0.44388	0.94962	-3.274	0.75844	-0.033942
670	-180	-60	-60	2.5	90	51.4979	58.9095	110.645	0	0	0	1.1809	0	0	1.9021	1.3365	0	0	-2.5	0	1.6175	1.8944	-0.89276	1.6168	1.8947	0.8923	2.9707	1.137	0.00044738	0.53946	-2.4556	-0.93438	0.56238	-2.4528	0.92053	-0.986	-2.947	0.012616
671	-180	-60	-60	2.5	270	61.2261	68.8263	105.614	0	0	0	1.1738	0	0	2.2657	0.96162	0	0	2.5	0	2.1917	1.5833	-0.89273	2.1953	1.5783	0.89624	3.2008	0.40324	-0.0035288	-0.54192	2.4893	-0.93864	-0.62069	2.4854	0.88825	0.86771	3.1464	0.040202
672	-180	-60	-60	2.5	116.36	49.1972	56.0923	108.113	0	0	0	1.1764	0	0	1.9113	1.3263	0	-1.11	-2.24	0	1.6308	1.8846	-0.89362	1.6282	1.8864	0.89173	2.9778	1.1168	0.0016712	-0.69032	-2.6007	-0.92877	-0.6965	-2.5971	0.93291	-2.0998	-1.8073	-0.004092
673	-180	-60	-60	2.5	243.64	46.541	50.227	106.864	0	0	0	1.1744	0	0	2.0225	1.2282	0	-1.11	2.24	0	1.7898	1.8028	-0.89729	1.7765	1.813	0.88706	3.0685	0.93079	0.0089125	-1.6144	2.0409	-0.93599	-1.6507	2.0181	0.91018	-0.3995	3.0571	0.023973
674	-180	-60	-60	2.5	96.8508	49.8345	56.6017	109.373	0	0	0	1.18	0	0	1.9026	1.3347	0	-0.29821	-2.4822	0	1.6183	1.8924	-0.89293	1.6171	1.8931	0.89211	2.971	1.1342	0.00075424	0.23668	-2.5586	-0.93566	0.25977	-2.5585	0.92204	-1.3614	-2.6808	0.013096
675	-180	-60	-60	2.5	145.558	54.5948	68.7583	106.916	0	0	0	1.1722	0	0	1.9423	1.3087	0	-2.0618	-1.4139	0	1.6735	1.8706	-0.89477	1.6697	1.8734	0.89185	3.0031	1.0731	0.002553	-1.926	-1.9649	-0.92008	-1.9308	-1.9195	0.94643	-2.5259	-0.44088	-0.024753
676	-180	-60	-60	2.5	214.442	51.2954	60.0103	107.352	0	0	0	1.1733	0	0	1.9887	1.2772	0	-2.0618	1.4139	0	1.7386	1.8465	-0.89576	1.7312	1.8519	0.89017	3.0419	1.0088	0.0049419	-2.2899	0.91785	-0.93209	-2.2962	0.90398	0.92297	-1.9635	2.4924	0.008315
677	-180	-60	-60	2.5	263.149	54.3011	59.2846	106.184	0	0	0	1.1741	0	0	2.185	1.0571	0	-0.29821	2.4822	0	2.0516	1.6654	-0.8951	2.049	1.6683	0.89256	3.1678	0.58939	0.0017765	-0.8402	2.4542	-0.93783	-0.9108	2.4424	0.89268	0.56065	3.1395	0.038201
678	-180	-60	-60	1.30503	180	52.1501	52.1818	87.5219	0	0	0	1.2211	0	0	1.8483	1.3897	0	-1.305	0	0	1.5314	1.9386	-0.89149	1.5317	1.9385	0.89171	2.9319	1.2717	-0.00017068	-1.6843	-0.51891	-0.89877	-1.7041	-0.60949	0.83295	-1.8499	0.98097	0.041679
679	-180	-60	-60	1.30503	90	44.8247	44.9066	119.307	0	0	0	1.2921	0	0	1.8808	1.3592	0	0	-1.305	0	1.5622	1.9136	-0.88803	1.5598	1.9169	0.88521	2.9665	1.268	0.0014379	0.48847	-1.7921	-0.84605	0.38648	-1.7721	0.91085	-1.0415	-1.7041	-0.049242
680	-180	-60	-60	1.30503	270	84.897	84.9736	134.426	0	0	0	1.3373	0	0	2.3938	0.98588	0	0	1.305	0	2.3674	1.6519	-0.87455	2.4015	1.6139	0.90169	3.3181	0.41045	-0.024681	-0.52242	1.6964	-0.90485	-0.79932	1.664	0.71057	0.79586	1.9962	0.21654
681	-180	-60	-60	1.30503	116.36	11.1999	11.2696	80.3794	0	0	0	1.241	0	0	1.8051	1.3575	0	-0.57945	-1.1693	0	1.4762	1.9033	-0.88894	1.469	1.9065	0.88426	2.892	1.2843	0.0042536	-0.31217	-1.7753	-0.88081	-0.2922	-1.7878	0.8657	-1.6698	-1.0825	0.012049
682	-180	-60	-60	1.30503	243.64	21.1998	21.2623	99.9026	0	0	0	1.2559	0	0	2.0682	1.2409	0	-0.57945	1.1693	0	1.8836	1.8778	-0.87183	1.9254	1.841	0.90543	3.1029	0.9059	-0.029292	-1.2102	1.2731	-0.89913	-1.3261	1.2162	0.80962	0.029697	2.0729	0.073039
683	-180	-60	-60	1.30503	96.8508	28.1546	28.2319	105.22	0	0	0	1.2733	0	0	1.8552	1.356	0	-0.15567	-1.2957	0	1.535	1.9095	-0.88788	1.5318	1.9124	0.88504	2.9413	1.2696	0.0018892	0.28411	-1.8069	-0.86191	0.23899	-1.7951	0.89132	-1.2247	-1.5788	-0.022761
684	-180	-60	-60	1.30503	145.558	30.8992	30.9391	77.0179	0	0	0	1.2256	0	0	1.7846	1.3708	0	-1.0763	-0.73808	0	1.4469	1.9059	-0.89171	1.4356	1.9107	0.88428	2.8724	1.3009	0.0066586	-1.1375	-1.401	-0.88686	-1.1184	-1.4488	0.85175	-1.999	-0.14506	0.025282
685	-180	-60	-60	1.30503	214.442	28.5665	28.6093	87.3453	0	0	0	1.2267	0	0	1.8986	1.3647	0	-1.0763	0.73808	0	1.6147	1.9436	-0.8841	1.6332	1.9343	0.89589	2.9736	1.196	-0.01145	-1.6581	0.50507	-0.90276	-1.7247	0.42373	0.82877	-0.99329	1.8538	0.049988
686	-180	-60	-60	1.30503	263.149	58.9576	59.0551	121.355	0	0	0	1.3076	0	0	2.3018	1.0643	0	-0.15567	1.2957	0	2.2369	1.7308	-0.87015	2.2774	1.6828	0.90674	3.2591	0.54673	-0.031641	-0.71928	1.6179	-0.90266	-0.93171	1.5778	0.751	0.62245	2.0229	0.15136
687	-180	-60	-60	2.29497	180	64.0526	83.7342	110.078	0	0	0	1.1734	0	0	2.0012	1.2794	0	-2.295	0	0	1.7558	1.8514	-0.89509	1.7524	1.8539	0.89249	3.0511	0.9994	0.0023107	-2.1367	-0.53411	-0.9251	-2.1368	-0.53286	0.92583	-3.0111	0.81666	-0.00056932
688	-180	-60	-60	2.29497	90	49.1984	50.6235	113.741	0	0	0	1.1936	0	0	1.8472	1.366	0	0	-2.295	0	1.5398	1.9155	-0.891	1.5408	1.9146	0.89186	2.9245	1.2174	-0.00065294	0.53993	-2.3329	-0.93519	0.58345	-2.328	0.90864	-0.99085	-2.7348	0.023747
689	-180	-60	-60	2.29497	270	64.4991	66.8193	110.616	0	0	0	1.1798	0	0	2.3269	0.8774	0	0	2.295	0	2.3054	1.5079	-0.89005	2.3174	1.4904	0.90218	3.2169	0.25003	-0.011671	-0.53802	2.4426	-0.93187	-0.6273	2.4404	0.87457	0.94995	2.8045	0.051777
690	-180	-60	-60	2.29497	116.36	45.7059	47.0317	109.626	0	0	0	1.1841	0	0	1.8556	1.3522	0	-1.019	-2.0563	0	1.553	1.9014	-0.89245	1.5508	1.9028	0.89083	2.9308	1.1903	0.0014277	-0.63062	-2.4707	-0.92139	-0.64085	-2.4646	0.92831	-2.0303	-1.674	-0.006769
691	-180	-60	-60	2.29497	243.64	42.2957	42.4678	107.669	0	0	0	1.1805	0	0	2.0356	1.2079	0	-1.019	2.0563	0	1.811	1.787	-0.89716	1.7986	1.797	0.88736	3.0795	0.90232	0.0084276	-1.556	1.9281	-0.93199	-1.6036	1.8986	0.89801	-0.31379	2.8788	0.031634
692	-180	-60	-60	2.29497	96.8508	46.3485	47.4548	111.353	0	0	0	1.1912	0	0	1.8477	1.3624	0	-0.27376	-2.2786	0	1.5411	1.9117	-0.89134	1.5412	1.9115	0.89153	2.9246	1.2116	-0.00010937	0.25123	-2.4277	-0.93363	0.28839	-2.4282	0.91156	-1.334	-2.4985	0.020902
693	-180	-60	-60	2.29497	145.558	56.2635	63.5099	111.674	0	0	0	1.1766	0	0	1.8984	1.3305	0	-1.8927	-1.298	0	1.6114	1.8844	-0.89435	1.6067	1.8877	0.89079	2.9671	1.1324	0.0030373	-1.8239	-1.8854	-0.90642	-1.8325	-1.8136	0.9495	-2.4036	-0.34889	-0.038798
694	-180	-60	-60	2.29497	214.442	50.8467	53.9976	110.916	0	0	0	1.178	0	0	1.9907	1.2743	0	-1.8927	1.298	0	1.7412	1.8448	-0.89563	1.7334	1.8508	0.88956	3.045	1.0093	0.0052962	-2.1775	0.83797	-0.93611	-2.197	0.79427	0.90684	-1.8163	2.3795	0.02605
695	-180	-60	-60	2.29497	263.149	54.181	54.969	109.108	0	0	0	1.1807	0	0	2.2344	0.99595	0	-0.27376	2.2786	0	2.1396	1.6156	-0.89291	2.146	1.6089	0.898	3.1897	0.47434	-0.0053509	-0.82597	2.3768	-0.92934	-0.89933	2.3649	0.88274	0.63957	2.8536	0.04334
696	-180	-60	-60	1.15328	180	86.1166	86.1803	119.919	0	0	0	1.2229	0	0	1.8403	1.3835	0	-1.1533	0	0	1.5254	1.9378	-0.88935	1.5298	1.9348	0.89273	2.9234	1.2666	-0.002664	-1.5891	-0.51739	-0.89615	-1.6262	-0.65267	0.79163	-1.776	0.97356	0.056545
697	-180	-60	-60	1.15328	90	104.961	105.066	177.365	0	0	0	1.3288	0	0	1.9226	1.3531	0	0	-1.1533	0	1.6095	1.9136	-0.88682	1.6098	1.9172	0.88509	3.0079	1.2534	-0.00051917	0.46936	-1.7307	-0.81295	0.30117	-1.6883	0.92207	-1.0551	-1.5706	-0.07673
698	-180	-60	-60	1.15328	270	138.905	139.005	188.571	0	0	0	1.386	0	0	2.3709	1.047	0	0	1.1533	0	2.3025	1.7123	-0.87585	2.3423	1.6832	0.89715	3.3265	0.52506	-0.021977	-0.52569	1.5873	-0.91053	-0.91012	1.5276	0.62309	0.70802	1.9254	0.29514
699	-180	-60	-60	1.15328	116.36	57.8868	57.9848	123.352	0	0	0	1.2556	0	0	1.8263	1.3502	0	-0.51208	-1.0334	0	1.504	1.9041	-0.88752	1.4989	1.9051	0.88486	2.9128	1.2698	0.0030634	-0.26987	-1.6811	-0.87403	-0.22613	-1.7093	0.83895	-1.6166	-1.0193	0.024689
700	-180	-60	-60	1.15328	243.64	67.7659	67.8629	145.406	0	0	0	1.2739	0	0	2.0641	1.2517	0	-0.51208	1.0334	0	1.8755	1.893	-0.86911	1.9223	1.8554	0.90455	3.1008	0.92362	-0.031616	-1.1628	1.18	-0.89707	-1.3225	1.1081	0.76457	0.050283	1.9762	0.093767
701	-180	-60	-60	1.53212	180	53.8072	53.7783	90.009	0	0	0	1.2234	0	0	1.8585	1.3954	0	-1.5321	0	0	1.54	1.9404	-0.89307	1.537	1.9425	0.89072	2.9428	1.2771	0.00189	-1.8279	-0.52455	-0.90856	-1.8357	-0.58323	0.86956	-1.9792	1.0016	0.029726
702	-180	-60	-60	1.53212	90	20.0462	20.0628	95.4055	0	0	0	1.2632	0	0	1.8373	1.3704	0	0	-1.5321	0	1.5108	1.9185	-0.88841	1.5085	1.9201	0.88657	2.9238	1.2916	0.0013841	0.51002	-1.9015	-0.88339	0.48063	-1.8982	0.90167	-1.0318	-1.9151	-0.01476
703	-180	-60	-60	1.53212	270	61.5704	61.5905	111.008	0	0	0	1.2936	0	0	2.4099	0.9293	0	0	1.5321	0	2.4241	1.5961	-0.87183	2.4542	1.542	0.90948	3.3016	0.30476	-0.030618	-0.52195	1.8779	-0.90405	-0.69314	1.867	0.79118	0.89439	2.0989	0.13126
704	-180	-60	-60	1.53212	116.36	1.51011	1.51378	73.0191	0	0	0	1.2283	0	0	1.7833	1.3688	0	-0.68029	-1.3728	0	1.4475	1.9076	-0.8896	1.441	1.9109	0.8851	2.8704	1.3017	0.0039129	-0.38119	-1.9285	-0.89154	-0.37983	-1.9292	0.89063	-1.7525	-1.1939	0.000856
705	-180	-60	-60	1.53212	243.64	9.22267	9.21984	87.7646	0	0	0	1.2371	0	0	2.0654	1.2265	0	-0.68029	1.3728	0	1.8766	1.8523	-0.87756	1.909	1.8234	0.90387	3.1016	0.89527	-0.022932	-1.2875	1.4184	-0.90726	-1.3682	1.3746	0.8484	-0.021897	2.2344	0.053826
706	-180	-60	-60	2.06788	180	74.1216	85.8387	120.008	0	0	0	1.18	0	0	2.011	1.2833	0	-2.0679	0	0	1.767	1.8569	-0.89478	1.765	1.8591	0.8928	3.0611	1.0025	0.0014791	-1.9956	-0.53935	-0.93418	-1.9935	-0.59022	0.90252	-2.7827	0.82352	0.022867
707	-180	-60	-60	2.06788	90	39.9642	39.8718	109.834	0	0	0	1.2146	0	0	1.8014	1.3865	0	0	-2.0679	0	1.4736	1.9291	-0.88907	1.4758	1.9275	0.8908	2.8855	1.2897	-0.0013569	0.53677	-2.1969	-0.92972	0.58713	-2.1932	0.89891	-1.0026	-2.4866	0.02701
708	-180	-60	-60	2.06788	270	64.8581	64.8002	113.374	0	0	0	1.2005	0	0	2.3887	0.81863	0	0	2.0679	0	2.4251	1.4622	-0.88224	2.4444	1.4206	0.91025	3.2363	0.13509	-0.023514	-0.52457	2.358	-0.90859	-0.57917	2.3543	0.87639	1.0056	2.4347	0.039446
709	-180	-60	-60	2.06788	116.36	34.8995	34.7989	103.709	0	0	0	1.1975	0	0	1.7949	1.3756	0	-0.91817	-1.8529	0	1.4682	1.9144	-0.89089	1.4661	1.9156	0.88939	2.8778	1.2693	0.0013078	-0.55909	-2.3148	-0.91257	-0.57175	-2.3072	0.92124	-1.9481	-1.5202	-0.008366
710	-180	-60	-60	2.06788	243.64	32.94	32.8582	104.125	0	0	0	1.1933	0	0	2.0457	1.2015	0	-0.91817	1.8529	0	1.8322	1.7919	-0.89339	1.8307	1.7936	0.89179	3.0876	0.88819	0.0010297	-1.4779	1.778	-0.92622	-1.5319	1.7453	0.88779	-0.21683	2.6787	0.036103
711	-180	-60	-60	2.44672	180	59.5386	82.6537	105.126	0	0	0	1.1717	0	0	1.9949	1.2815	0	-2.4467	0	0	1.7473	1.8523	-0.89514	1.7435	1.855	0.8924	3.0456	1.0049	0.0025198	-2.2177	-0.52723	-0.91319	-2.2205	-0.47381	0.94282	-3.1948	0.78487	-0.023425
712	-180	-60	-60	2.44672	90	51.2097	56.8975	111.717	0	0	0	1.1834	0	0	1.8897	1.3434	0	0	-2.4467	0	1.5999	1.8995	-0.89237	1.5996	1.8996	0.89221	2.9604	1.1552	0.00019612	0.53988	-2.4237	-0.9351	0.56814	-2.4203	0.91799	-0.98719	-2.8919	0.015485
713	-180	-60	-60	2.44672	270	62.1226	68.3133	106.926	0	0	0	1.1748	0	0	2.2798	0.94138	0	0	2.4467	0	2.2174	1.565	-0.89238	2.2226	1.558	0.89734	3.2051	0.36695	-0.005	-0.54206	2.4739	-0.93887	-0.62893	2.4703	0.88292	0.88695	3.0654	0.045571
714	-180	-60	-60	2.44672	116.36	48.6229	53.9094	108.807	0	0	0	1.178	0	0	1.8993	1.3321	0	-1.0864	-2.1923	0	1.6141	1.8886	-0.89337	1.6116	1.8902	0.89154	2.9678	1.1328	0.0016178	-0.67458	-2.5668	-0.92714	-0.68172	-2.5627	0.93194	-2.0822	-1.773	-0.00473
715	-180	-60	-60	2.44672	243.64	45.7629	48.2928	107.331	0	0	0	1.1755	0	0	2.0262	1.2227	0	-1.0864	2.1923	0	1.7957	1.7984	-0.89729	1.7826	1.8086	0.88708	3.0715	0.92268	0.0088739	-1.5996	2.0118	-0.93537	-1.6393	1.9869	0.90712	-0.3764	3.0101	0.026248
716	-180	-60	60	1.8	180	77.2823	77.1912	114.613	0	0	0	1.2241	0	0	1.8988	1.3921	0	-1.8	0	0	1.5927	1.9434	0.89348	2.9806	1.2484	-0.0021491	1.5892	1.9448	-0.89136	-1.962	-0.5347	-0.92612	-1.9628	-0.58855	0.89247	-2.212	1.006	0.028414
717	-180	-60	60	1.8	90	26.1783	26.1298	100.015	0	0	0	1.2388	0	0	1.8043	1.3828	0	0	-1.8	0	1.4724	1.9261	0.88836	2.8908	1.3071	0.00045867	1.4732	1.926	-0.88874	0.52719	-2.0441	-0.91312	0.55229	-2.0446	0.89773	-1.021	-2.1857	0.013039
718	-180	-60	60	1.8	270	61.8597	61.8243	111.736	0	0	0	1.2445	0	0	2.4108	0.86266	0	0	1.8	0	2.4579	1.5238	0.87216	3.2718	0.19625	0.025029	2.4693	1.4681	-0.91134	-0.52399	2.1061	-0.90757	-0.60759	2.1207	0.84945	0.97345	2.2304	0.051637
719	-180	-60	60	1.8	116.36	17.1827	17.1203	88.8755	0	0	0	1.2138	0	0	1.7748	1.3778	0	-0.79923	-1.6128	0	1.4384	1.9141	0.88985	2.8609	1.3025	-0.0022328	1.4347	1.9159	-0.88733	-0.46756	-2.1181	-0.90329	-0.47658	-2.1127	0.90951	-1.8499	-1.3464	-0.005859
720	-180	-60	60	1.8	243.64	19.9511	19.9029	96.4172	0	0	0	1.2145	0	0	2.0561	1.2099	0	-0.79923	1.6128	0	1.8568	1.8187	0.88549	3.0956	0.88824	0.0098841	1.8704	1.8047	-0.8981	-1.3814	1.5939	-0.91812	-1.4441	1.5601	0.87351	-0.10865	2.4474	0.040059
721	-180	-60	60	1.8	96.8508	19.2141	19.1589	94.3428	0	0	0	1.2292	0	0	1.7968	1.3785	0	-0.21471	-1.7871	0	1.4653	1.9211	0.88863	2.8829	1.2999	-9.2081e-05	1.4652	1.9214	-0.88839	0.2787	-2.1002	-0.91319	0.30571	-2.1034	0.89675	-1.279	-2.0147	0.014703
722	-180	-60	60	1.8	145.558	43.8337	43.7688	98.5071	0	0	0	1.2095	0	0	1.7532	1.3901	0	-1.4845	-1.018	0	1.4047	1.9134	0.89239	2.841	1.327	-0.0058484	1.3948	1.9177	-0.88588	-1.4933	-1.6458	-0.88801	-1.5112	-1.5858	0.92676	-2.1669	-0.18297	-0.034071
723	-180	-60	60	1.8	214.442	35.8591	35.7902	101.532	0	0	0	1.2066	0	0	1.9578	1.3115	0	-1.4845	1.018	0	1.6941	1.8863	0.89125	3.0251	1.0974	0.00020701	1.6941	1.8849	-0.8921	-1.9057	0.65516	-0.93094	-1.9495	0.57504	0.87291	-1.399	2.1046	0.048073
724	-180	-60	60	1.8	263.149	42.9523	42.9237	104.359	0	0	0	1.2326	0	0	2.3093	0.97971	0	-0.21471	1.7871	0	2.2811	1.6365	0.87436	3.2338	0.40536	0.024828	2.3016	1.5874	-0.91027	-0.771	2.0176	-0.90901	-0.84245	2.0187	0.86114	0.71434	2.3177	0.040547
725	-180	-60	60	1.1	180	111.981	112.059	145.044	0	0	0	1.2249	0	0	1.8365	1.3807	0	-1.1	0	0	1.5219	1.937	0.88843	2.9195	1.2653	0.0044391	1.529	1.9336	-0.89311	-1.5587	-0.51712	-0.89569	-1.604	-0.67834	0.7697	-1.7527	0.97331	0.065391
726	-180	-60	60	1.1	90	141.857	141.975	213.199	0	0	0	1.3492	0	0	1.9423	1.3513	0	0	-1.1	0	1.6329	1.9181	0.88515	3.0275	1.2494	-0.0013863	1.6317	1.9143	-0.8866	0.46139	-1.7129	-0.79915	0.26313	-1.6597	0.92809	-1.0639	-1.5244	-0.087466
727	-180	-60	60	1.1	270	172.269	172.384	221.979	0	0	0	1.4126	0	0	2.364	1.0719	0	0	1.1	0	2.2922	1.7461	0.86823	3.3353	0.58088	0.0074241	2.28	1.7195	-0.89033	-0.52837	1.5519	-0.91516	-0.96174	1.4817	0.58049	0.67238	1.9008	0.32133
728	-180	-60	60	1.1	116.36	89.8673	89.9941	153.301	0	0	0	1.2635	0	0	1.8357	1.3479	0	-0.48842	-0.98562	0	1.5151	1.9037	0.88727	2.9222	1.2647	-0.0010751	1.5133	1.9069	-0.88471	-0.25636	-1.651	-0.87184	-0.19951	-1.6879	0.82526	-1.5991	-0.99985	0.030987
729	-180	-60	60	1.1	243.64	99.3287	99.4544	176.137	0	0	0	1.2831	0	0	2.0623	1.2553	0	-0.48842	0.98562	0	1.8766	1.9035	0.86528	3.1008	0.93289	0.027764	1.9104	1.8563	-0.90554	-1.1476	1.1476	-0.89835	-1.3292	1.0716	0.74205	0.054288	1.9452	0.097232
730	-180	-60	60	1.1	96.8508	119.867	120.031	192.801	0	0	0	1.3165	0	0	1.902	1.3487	0	-0.13121	-1.0921	0	1.59	1.9134	0.88532	2.9878	1.254	-0.0012361	1.5881	1.9109	-0.88601	0.27639	-1.7095	-0.8285	0.18636	-1.6799	0.8909	-1.2114	-1.4191	-0.041653
731	-180	-60	60	1.1	145.558	96.9816	97.0796	139.869	0	0	0	1.2343	0	0	1.8067	1.3578	0	-0.90717	-0.62212	0	1.4801	1.9053	0.88965	2.8932	1.2736	-0.0019452	1.4769	1.9096	-0.88596	-1.0032	-1.3135	-0.89357	-0.94542	-1.4516	0.7862	-1.9277	-0.15013	0.064542
732	-180	-60	60	1.1	214.442	96.1202	96.232	149.8	0	0	0	1.2368	0	0	1.8768	1.3723	0	-0.90717	0.62212	0	1.5904	1.9588	0.87885	2.9523	1.2112	0.01477	1.6127	1.9417	-0.89693	-1.5635	0.44916	-0.88994	-1.6598	0.35101	0.78462	-0.85628	1.7782	0.059221
733	-180	-60	60	1.1	263.149	144.874	145.041	206.53	0	0	0	1.3634	0	0	2.2786	1.1177	0	-0.13121	1.0921	0	2.185	1.7916	0.86492	3.2663	0.66102	0.017505	2.1902	1.7462	-0.89996	-0.70746	1.465	-0.91392	-1.0382	1.402	0.64496	0.54349	1.9222	0.21438
734	-180	-60	60	2.5	180	58.3116	82.3461	103.737	0	0	0	1.1713	0	0	1.993	1.2822	0	-2.5	0	0	1.7447	1.8526	0.89521	3.0441	1.0066	-0.0024783	1.7411	1.8555	-0.8923	-2.24	-0.52351	-0.90674	-2.2444	-0.44387	0.94962	-3.274	0.75845	-0.033927
735	-180	-60	60	2.5	90	51.4979	58.9095	110.645	0	0	0	1.1809	0	0	1.9021	1.3365	0	0	-2.5	0	1.6174	1.8943	0.89278	2.9707	1.137	-0.00042421	1.6168	1.8948	-0.89226	0.53946	-2.4556	-0.93438	0.56238	-2.4528	0.92053	-0.986	-2.947	0.012614
736	-180	-60	60	2.5	270	61.227	68.8213	105.615	0	0	0	1.1738	0	0	2.2657	0.96145	0	0	2.5	0	2.1915	1.5828	0.89271	3.2011	0.40353	0.001605	2.1937	1.5799	-0.89521	-0.54191	2.4876	-0.93862	-0.62064	2.4867	0.8883	0.86736	3.147	0.038919
737	-180	-60	60	2.5	116.36	49.1972	56.0922	108.113	0	0	0	1.1764	0	0	1.9113	1.3263	0	-1.11	-2.24	0	1.6308	1.8846	0.89362	2.9778	1.1168	-0.0016719	1.6282	1.8864	-0.89173	-0.69029	-2.6007	-0.92877	-0.69653	-2.5972	0.93291	-2.0998	-1.8073	-0.004101
738	-180	-60	60	2.5	243.64	46.5406	50.2259	106.887	0	0	0	1.1743	0	0	2.0225	1.2282	0	-1.11	2.24	0	1.7897	1.8028	0.89728	3.0685	0.9309	-0.0090962	1.7763	1.8131	-0.88695	-1.6151	2.0424	-0.93593	-1.6501	2.0166	0.91018	-0.39952	3.0571	0.024992
739	-180	-60	60	2.5	96.8508	49.8345	56.6017	109.373	0	0	0	1.18	0	0	1.9026	1.3347	0	-0.29821	-2.4822	0	1.6183	1.8924	0.89295	2.971	1.1342	-0.00074039	1.6172	1.8932	-0.89209	0.23669	-2.5586	-0.93566	0.25977	-2.5585	0.92204	-1.3614	-2.6808	0.013092
740	-180	-60	60	2.5	145.558	54.5948	68.7583	106.916	0	0	0	1.1722	0	0	1.9423	1.3087	0	-2.0618	-1.4139	0	1.6736	1.8706	0.89475	3.0031	1.0731	-0.0025801	1.6696	1.8733	-0.89189	-1.9258	-1.9648	-0.92011	-1.931	-1.9196	0.9464	-2.5259	-0.44088	-0.024735
741	-180	-60	60	2.5	214.442	51.2955	60.0105	107.352	0	0	0	1.1733	0	0	1.9887	1.2772	0	-2.0618	1.4139	0	1.7386	1.8465	0.89575	3.0419	1.0088	-0.0049521	1.7312	1.8519	-0.89018	-2.2901	0.91799	-0.93211	-2.2959	0.90385	0.92295	-1.9635	2.4924	0.008453
742	-180	-60	60	2.5	263.149	54.3003	59.2798	106.206	0	0	0	1.174	0	0	2.185	1.0571	0	-0.29821	2.4822	0	2.0514	1.6651	0.89506	3.168	0.58979	-0.0033372	2.0474	1.6694	-0.89169	-0.84033	2.4554	-0.9378	-0.91083	2.4411	0.8926	0.56038	3.1398	0.039277
743	-180	-60	60	1.30503	180	52.1501	52.1818	87.5219	0	0	0	1.2211	0	0	1.8483	1.3897	0	-1.305	0	0	1.5314	1.9387	0.89146	2.9319	1.2716	0.00029067	1.5318	1.9384	-0.89178	-1.6843	-0.5189	-0.89877	-1.7041	-0.60949	0.83295	-1.8499	0.98097	0.041689
744	-180	-60	60	1.30503	90	44.8248	44.9067	119.307	0	0	0	1.2921	0	0	1.8808	1.3592	0	0	-1.305	0	1.5632	1.9151	0.88758	2.9665	1.2679	-0.0025621	1.559	1.9153	-0.88575	0.48847	-1.7921	-0.84605	0.38649	-1.7721	0.91085	-1.0415	-1.7041	-0.049248
745	-180	-60	60	1.30503	270	84.9679	85.0445	134.405	0	0	0	1.3371	0	0	2.3975	0.98005	0	0	1.305	0	2.3842	1.6519	0.8701	3.3223	0.40603	0.011483	2.38	1.617	-0.89663	-0.52317	1.693	-0.90616	-0.79597	1.6675	0.71192	0.79771	1.997	0.20605
746	-180	-60	60	1.30503	116.36	11.1998	11.2696	80.3793	0	0	0	1.241	0	0	1.8051	1.3575	0	-0.57945	-1.1693	0	1.4759	1.903	0.88904	2.892	1.2843	-0.0040398	1.4692	1.9068	-0.88412	-0.31213	-1.7752	-0.88083	-0.29222	-1.7878	0.86567	-1.6698	-1.0825	0.012003
747	-180	-60	60	1.30503	243.64	21.2155	21.279	99.9183	0	0	0	1.2559	0	0	2.0691	1.2401	0	-0.57945	1.1693	0	1.8881	1.8802	0.87023	3.1038	0.90531	0.025548	1.9203	1.8389	-0.9055	-1.2097	1.2713	-0.89973	-1.3256	1.2186	0.80979	0.029928	2.0731	0.067458
748	-180	-60	60	1.30503	96.8508	28.1547	28.232	105.22	0	0	0	1.2733	0	0	1.8552	1.356	0	-0.15567	-1.2957	0	1.5355	1.9104	0.88761	2.9413	1.2696	-0.002488	1.5314	1.9114	-0.88538	0.28412	-1.8069	-0.86191	0.239	-1.7951	0.89131	-1.2247	-1.5788	-0.022769
749	-180	-60	60	1.30503	145.558	30.8989	30.9388	77.0175	0	0	0	1.2256	0	0	1.7846	1.3708	0	-1.0763	-0.73808	0	1.4465	1.9052	0.89189	2.8724	1.301	-0.0064038	1.4356	1.9115	-0.88394	-1.1373	-1.4009	-0.88693	-1.1186	-1.449	0.85164	-1.999	-0.14507	0.025129
750	-180	-60	60	1.30503	214.442	28.5653	28.6082	87.344	0	0	0	1.2267	0	0	1.8986	1.3647	0	-1.0763	0.73808	0	1.6162	1.9456	0.88333	2.9736	1.1958	0.01098	1.6325	1.9322	-0.89697	-1.658	0.50498	-0.9028	-1.7248	0.4237	0.82866	-0.99332	1.8538	0.049791
751	-180	-60	60	1.30503	263.149	59.022	59.1212	121.351	0	0	0	1.3076	0	0	2.3046	1.0607	0	-0.15567	1.2957	0	2.2507	1.7335	0.86613	3.2622	0.54371	0.021068	2.2614	1.6818	-0.90478	-0.71962	1.614	-0.90405	-0.9287	1.5822	0.75196	0.62387	2.0235	0.13986
752	-180	-60	60	2.29497	180	64.0526	83.7341	110.078	0	0	0	1.1734	0	0	2.0012	1.2794	0	-2.295	0	0	1.7558	1.8514	0.89509	3.0511	0.9994	-0.0023057	1.7524	1.8539	-0.89249	-2.1367	-0.53411	-0.9251	-2.1368	-0.53285	0.92584	-3.0111	0.81666	-0.00056434
753	-180	-60	60	2.29497	90	49.1984	50.6235	113.741	0	0	0	1.1936	0	0	1.8472	1.366	0	0	-2.295	0	1.5397	1.9153	0.89107	2.9245	1.2174	0.00072276	1.5409	1.9149	-0.89177	0.53994	-2.3329	-0.9352	0.58345	-2.328	0.90864	-0.99085	-2.7348	0.023751
754	-180	-60	60	2.29497	270	64.5075	66.8269	110.602	0	0	0	1.1798	0	0	2.3271	0.87687	0	0	2.295	0	2.3062	1.5075	0.88969	3.2176	0.25038	0.0072427	2.313	1.4934	-0.90018	-0.53845	2.4362	-0.93262	-0.62641	2.4457	0.87429	0.94947	2.8061	0.046478
755	-180	-60	60	2.29497	116.36	45.7059	47.0317	109.626	0	0	0	1.1841	0	0	1.8556	1.3522	0	-1.019	-2.0563	0	1.553	1.9014	0.89245	2.9308	1.1903	-0.001429	1.5508	1.9028	-0.89084	-0.63059	-2.4706	-0.9214	-0.64087	-2.4647	0.9283	-2.0303	-1.674	-0.006783
756	-180	-60	60	2.29497	243.64	42.2949	42.4666	107.668	0	0	0	1.1805	0	0	2.0356	1.2079	0	-1.019	2.0563	0	1.811	1.7871	0.89712	3.0795	0.90254	-0.0089027	1.7979	1.7972	-0.88712	-1.5565	1.9294	-0.93185	-1.6032	1.8972	0.89804	-0.31388	2.8788	0.032799
757	-180	-60	60	2.29497	96.8508	46.3485	47.4548	111.353	0	0	0	1.1912	0	0	1.8477	1.3624	0	-0.27376	-2.2786	0	1.541	1.9116	0.89137	2.9246	1.2116	0.00015105	1.5413	1.9116	-0.89148	0.25123	-2.4277	-0.93363	0.28839	-2.4282	0.91156	-1.334	-2.4985	0.020904
758	-180	-60	60	2.29497	145.558	56.2635	63.51	111.674	0	0	0	1.1766	0	0	1.8984	1.3305	0	-1.8927	-1.298	0	1.6116	1.8846	0.89429	2.9671	1.1324	-0.0031106	1.6067	1.8874	-0.8909	-1.8237	-1.8853	-0.90648	-1.8327	-1.8138	0.94944	-2.4036	-0.3489	-0.038796
759	-180	-60	60	2.29497	214.442	50.8468	53.9976	110.916	0	0	0	1.178	0	0	1.9907	1.2743	0	-1.8927	1.298	0	1.7414	1.845	0.89559	3.045	1.0093	-0.0053676	1.7333	1.8507	-0.88962	-2.1778	0.83812	-0.93612	-2.1968	0.79413	0.90684	-1.8163	2.3795	0.026206
760	-180	-60	60	2.29497	263.149	54.1834	54.9701	109.11	0	0	0	1.1806	0	0	2.2345	0.99566	0	-0.27376	2.2786	0	2.14	1.6154	0.89267	3.1902	0.47479	0.0022898	2.1427	1.6107	-0.89652	-0.82588	2.3748	-0.9296	-0.89929	2.3664	0.88262	0.63916	2.8544	0.04171
761	-180	-60	60	1.15328	180	86.1165	86.1802	119.919	0	0	0	1.2229	0	0	1.8403	1.3835	0	-1.1533	0	0	1.5252	1.9375	0.88942	2.9234	1.2665	0.0031482	1.5302	1.9351	-0.89275	-1.5892	-0.51738	-0.89614	-1.6261	-0.6527	0.79162	-1.776	0.97355	0.056651
762	-180	-60	60	1.15328	90	104.961	105.066	177.365	0	0	0	1.3288	0	0	1.9226	1.3531	0	0	-1.1533	0	1.6113	1.9165	0.88604	3.0079	1.2533	-0.0019642	1.6086	1.9142	-0.8861	0.46936	-1.7307	-0.81295	0.30119	-1.6883	0.92207	-1.0551	-1.5706	-0.076728
763	-180	-60	60	1.15328	270	138.98	139.08	188.645	0	0	0	1.3855	0	0	2.3749	1.0409	0	0	1.1533	0	2.322	1.7139	0.86954	3.3317	0.52216	0.0073207	2.3117	1.6875	-0.89099	-0.52625	1.585	-0.9115	-0.9083	1.5297	0.62393	0.70962	1.9266	0.28778
764	-180	-60	60	1.15328	116.36	57.8867	57.9847	123.352	0	0	0	1.2556	0	0	1.8263	1.3502	0	-0.51208	-1.0334	0	1.5033	1.9029	0.88789	2.9128	1.2699	-0.0022869	1.4994	1.9063	-0.8844	-0.26985	-1.6811	-0.87404	-0.22613	-1.7094	0.83894	-1.6166	-1.0193	0.024658
765	-180	-60	60	1.15328	243.64	67.7813	67.8791	145.421	0	0	0	1.274	0	0	2.0652	1.2507	0	-0.51208	1.0334	0	1.8822	1.8972	0.86649	3.102	0.92273	0.027321	1.9157	1.8511	-0.90565	-1.1624	1.1784	-0.89772	-1.3223	1.11	0.76456	0.050475	1.9766	0.087843
766	-180	-60	60	1.53212	180	53.8072	53.7783	90.0091	0	0	0	1.2234	0	0	1.8585	1.3954	0	-1.5321	0	0	1.5402	1.9407	0.89299	2.9428	1.2771	-0.0019555	1.5369	1.9423	-0.89084	-1.8279	-0.52456	-0.90856	-1.8357	-0.58322	0.86956	-1.9792	1.0016	0.029698
767	-180	-60	60	1.53212	90	20.0463	20.0628	95.4055	0	0	0	1.2632	0	0	1.8373	1.3704	0	0	-1.5321	0	1.511	1.9188	0.8883	2.9238	1.2916	-0.0016	1.5084	1.9197	-0.8867	0.51003	-1.9015	-0.88339	0.48063	-1.8982	0.90166	-1.0318	-1.9151	-0.014769
768	-180	-60	60	1.53212	270	61.6373	61.6575	110.937	0	0	0	1.2935	0	0	2.4126	0.92471	0	0	1.5321	0	2.4368	1.5953	0.86882	3.3045	0.30041	0.020241	2.4408	1.5439	-0.90617	-0.52287	1.8729	-0.90564	-0.68786	1.8728	0.79284	0.8964	2.0985	0.1176
769	-180	-60	60	1.53212	116.36	1.51011	1.51378	73.0191	0	0	0	1.2283	0	0	1.7833	1.3688	0	-0.68029	-1.3728	0	1.4475	1.9076	0.88961	2.8704	1.3017	-0.0039061	1.441	1.9109	-0.88509	-0.38113	-1.9284	-0.89157	-0.37987	-1.9293	0.89059	-1.7525	-1.1939	0.000806
770	-180	-60	60	1.53212	243.64	9.23326	9.23169	87.7522	0	0	0	1.2371	0	0	2.0659	1.226	0	-0.68029	1.3728	0	1.8789	1.8533	0.8768	3.1022	0.89502	0.020219	1.9056	1.8228	-0.90336	-1.2869	1.4167	-0.90775	-1.3678	1.377	0.84863	-0.021705	2.2346	0.049386
771	-180	-60	60	2.06788	180	74.1217	85.8389	120.008	0	0	0	1.18	0	0	2.011	1.2833	0	-2.0679	0	0	1.7674	1.8573	0.89463	3.0611	1.0024	-0.0017239	1.7647	1.8586	-0.893	-1.9956	-0.53935	-0.93418	-1.9935	-0.59021	0.90252	-2.7827	0.82352	0.022866
772	-180	-60	60	2.06788	90	39.9642	39.8718	109.834	0	0	0	1.2146	0	0	1.8014	1.3865	0	0	-2.0679	0	1.4734	1.9288	0.88918	2.8855	1.2898	0.0014873	1.4759	1.9279	-0.89066	0.53677	-2.1969	-0.92972	0.58713	-2.1932	0.89891	-1.0026	-2.4866	0.027023
773	-180	-60	60	2.06788	270	64.8749	64.8167	113.367	0	0	0	1.2004	0	0	2.3897	0.81719	0	0	2.0679	0	2.4285	1.4614	0.88157	3.2369	0.13318	0.020005	2.4421	1.4219	-0.90895	-0.52576	2.3496	-0.91064	-0.57145	2.3672	0.87699	1.0074	2.4309	0.023686
774	-180	-60	60	2.06788	116.36	34.8995	34.7989	103.709	0	0	0	1.1975	0	0	1.7949	1.3756	0	-0.91817	-1.8529	0	1.4682	1.9144	0.89088	2.8778	1.2693	-0.0013171	1.4661	1.9155	-0.8894	-0.55906	-2.3148	-0.91258	-0.57178	-2.3073	0.92123	-1.9481	-1.5202	-0.008383
775	-180	-60	60	2.06788	243.64	32.9397	32.8579	104.125	0	0	0	1.1933	0	0	2.0457	1.2015	0	-0.91817	1.8529	0	1.8324	1.792	0.89326	3.0877	0.88847	-0.0020036	1.8294	1.7939	-0.89137	-1.478	1.7782	-0.9262	-1.5319	1.745	0.88778	-0.21695	2.6788	0.036361
776	-180	-60	60	2.44672	180	59.5386	82.6536	105.126	0	0	0	1.1717	0	0	1.9949	1.2815	0	-2.4467	0	0	1.7472	1.8522	0.89518	3.0456	1.0049	-0.0024459	1.7436	1.8551	-0.89234	-2.2177	-0.52724	-0.9132	-2.2205	-0.47381	0.94281	-3.1948	0.78488	-0.023409
777	-180	-60	60	2.44672	90	51.2097	56.8975	111.717	0	0	0	1.1834	0	0	1.8897	1.3434	0	0	-2.4467	0	1.5999	1.8994	0.8924	2.9604	1.1552	-0.00016414	1.5997	1.8997	-0.89216	0.53988	-2.4237	-0.9351	0.56813	-2.4203	0.91799	-0.98719	-2.8919	0.015484
778	-180	-60	60	2.44672	270	62.1245	68.3102	106.927	0	0	0	1.1748	0	0	2.2799	0.94115	0	0	2.4467	0	2.2173	1.5645	0.89229	3.2055	0.36733	0.0023984	2.2203	1.56	-0.89601	-0.54208	2.4713	-0.93892	-0.6288	2.4722	0.88297	0.88647	3.0662	0.043572
779	-180	-60	60	2.44672	116.36	48.6229	53.9094	108.807	0	0	0	1.178	0	0	1.8993	1.3321	0	-1.0864	-2.1923	0	1.6141	1.8886	0.89337	2.9678	1.1328	-0.0016186	1.6116	1.8902	-0.89154	-0.67455	-2.5668	-0.92715	-0.68175	-2.5627	0.93193	-2.0822	-1.773	-0.00474
780	-180	-60	60	2.44672	243.64	45.7624	48.2917	107.331	0	0	0	1.1755	0	0	2.0262	1.2227	0	-1.0864	2.1923	0	1.7957	1.7984	0.89728	3.0715	0.92282	-0.0091167	1.7822	1.8088	-0.88694	-1.6003	2.0132	-0.93529	-1.6387	1.9855	0.90713	-0.37643	3.0101	0.027305
781	-180	60	-180	1.8	180	77.2823	77.1911	114.613	0	0	0	1.2241	0	0	1.8988	1.3921	0	-1.8	0	0	2.9806	1.2484	0	1.5909	1.9446	-0.89214	1.591	1.9437	0.8927	-1.962	-0.5347	0.92612	-2.212	1.006	-0.028446	-1.9628	-0.58858	-0.89246
782	-180	60	-180	1.8	90	26.1783	26.1298	100.015	0	0	0	1.2388	0	0	1.8043	1.3828	0	0	-1.8	0	2.8908	1.3071	0	1.4728	1.9259	-0.88865	1.4728	1.9263	0.88844	0.52719	-2.0441	0.91312	-1.021	-2.1857	-0.013037	0.55229	-2.0446	-0.89772
783	-180	60	-180	1.8	270	61.8274	61.792	111.75	0	0	0	1.2446	0	0	2.4093	0.86528	0	0	1.8	0	3.2707	0.19856	0	2.4663	1.4918	-0.89698	2.4608	1.5002	0.89108	-0.52335	2.1102	0.90647	0.97273	2.2309	-0.060512	-0.61121	2.1158	-0.8489
784	-180	60	-180	1.8	116.36	17.1827	17.1204	88.8755	0	0	0	1.2138	0	0	1.7748	1.3778	0	-0.79923	-1.6128	0	2.8609	1.3024	0	1.4366	1.915	-0.8886	1.4366	1.915	0.88864	-0.46759	-2.1181	0.90328	-1.8499	-1.3464	0.005881	-0.47661	-2.1127	-0.90954
785	-180	60	-180	1.8	243.64	19.9489	19.9007	96.4149	0	0	0	1.2145	0	0	2.0559	1.2101	0	-0.79923	1.6128	0	3.0954	0.88812	0	1.8651	1.8108	-0.8929	1.8631	1.8123	0.89149	-1.3817	1.5945	0.91799	-0.10861	2.4473	-0.041109	-1.4441	1.5594	-0.87349
786	-180	60	-180	1.8	96.8508	19.2141	19.1589	94.3428	0	0	0	1.2292	0	0	1.7968	1.3785	0	-0.21471	-1.7871	0	2.8829	1.2999	0	1.4653	1.9211	-0.88862	1.4653	1.9214	0.88842	0.2787	-2.1002	0.91319	-1.279	-2.0147	-0.014703	0.30571	-2.1034	-0.89675
787	-180	60	-180	1.8	145.558	43.8337	43.7688	98.5071	0	0	0	1.2095	0	0	1.7532	1.3901	0	-1.4845	-1.018	0	2.841	1.3269	0	1.3996	1.916	-0.88886	1.4	1.9151	0.88953	-1.4935	-1.6458	0.88796	-2.1669	-0.18296	0.034041	-1.5111	-1.5857	-0.92682
788	-180	60	-180	1.8	214.442	35.8591	35.7902	101.532	0	0	0	1.2066	0	0	1.9578	1.3115	0	-1.4845	1.018	0	3.0251	1.0975	0	1.694	1.8864	-0.89117	1.694	1.8849	0.89211	-1.9057	0.65515	0.93094	-1.399	2.1046	-0.048072	-1.9495	0.57504	-0.87291
789	-180	60	-180	1.8	263.149	42.9262	42.8973	104.379	0	0	0	1.2327	0	0	2.3081	0.98143	0	-0.21471	1.7871	0	3.2328	0.40654	0	2.2942	1.6086	-0.89649	2.2897	1.6144	0.8922	-0.7709	2.021	0.90815	0.71388	2.318	-0.047786	-0.84489	2.0143	-0.86066
790	-180	60	-180	1.1	180	111.981	112.059	145.044	0	0	0	1.2249	0	0	1.8365	1.3807	0	-1.1	0	0	2.9195	1.2654	0	1.5251	1.9352	-0.8907	1.5255	1.9355	0.89072	-1.5586	-0.51713	0.89569	-1.7527	0.97331	-0.065277	-1.604	-0.67832	-0.76969
791	-180	60	-180	1.1	90	141.857	141.975	213.222	0	0	0	1.3492	0	0	1.9423	1.3513	0	0	-1.1	0	3.0275	1.2495	0	1.6309	1.9193	-0.8836	1.6332	1.9131	0.88794	0.46139	-1.7129	0.79916	-1.0639	-1.5244	0.087482	0.2631	-1.6597	-0.92809
792	-180	60	-180	1.1	270	172.203	172.317	221.936	0	0	0	1.4131	0	0	2.361	1.0761	0	0	1.1	0	3.3319	0.58321	0	2.3073	1.7149	-0.89623	2.2711	1.7478	0.87027	-0.52781	1.5542	0.9142	0.67092	1.8995	-0.32829	-0.96327	1.4799	-0.57957
793	-180	60	-180	1.1	116.36	89.8674	89.9941	153.302	0	0	0	1.2635	0	0	1.8357	1.3479	0	-0.48842	-0.98562	0	2.9222	1.2647	0	1.5146	1.904	-0.88691	1.5141	1.9066	0.88517	-0.25637	-1.651	0.87184	-1.5991	-0.99986	-0.030998	-0.1995	-1.6879	-0.82525
794	-180	60	-180	1.1	243.64	99.313	99.4376	176.122	0	0	0	1.2831	0	0	2.0612	1.2563	0	-0.48842	0.98562	0	3.1	0.93298	0	1.8975	1.882	-0.88619	1.8909	1.8777	0.88786	-1.1477	1.1485	0.89802	0.054373	1.9449	-0.10009	-1.3293	1.0708	-0.74214
795	-180	60	-180	1.1	96.8508	119.867	120.031	192.8	0	0	0	1.3165	0	0	1.902	1.3487	0	-0.13121	-1.0921	0	2.9878	1.254	0	1.5885	1.9143	-0.88419	1.5894	1.9101	0.88702	0.27639	-1.7095	0.8285	-1.2114	-1.4191	0.041665	0.18634	-1.6799	-0.8909
796	-180	60	-180	1.1	145.558	96.9817	97.0797	139.869	0	0	0	1.2343	0	0	1.8067	1.3578	0	-0.90717	-0.62212	0	2.8932	1.2735	0	1.479	1.9058	-0.88894	1.4784	1.9091	0.88683	-1.0032	-1.3135	0.89357	-1.9277	-0.15014	-0.064569	-0.9454	-1.4516	-0.7862
797	-180	60	-180	1.1	214.442	96.1221	96.2337	149.802	0	0	0	1.2368	0	0	1.8767	1.3723	0	-0.90717	0.62212	0	2.9524	1.2114	0	1.6005	1.9526	-0.88616	1.6014	1.9481	0.88942	-1.5635	0.4492	0.88993	-0.85628	1.7782	-0.059443	-1.6598	0.35107	-0.7847
798	-180	60	-180	1.1	263.149	144.832	144.998	206.488	0	0	0	1.3635	0	0	2.2763	1.1204	0	-0.13121	1.0921	0	3.2638	0.66252	0	2.2008	1.7641	-0.88943	2.1774	1.7723	0.88127	-0.70725	1.4668	0.91319	0.54277	1.9214	-0.21997	-1.0392	1.4003	-0.64457
799	-180	60	-180	2.5	180	58.3116	82.3462	103.737	0	0	0	1.1713	0	0	1.993	1.2822	0	-2.5	0	0	3.0441	1.0066	0	1.743	1.8539	-0.89388	1.7429	1.8542	0.89368	-2.24	-0.5235	0.90674	-3.274	0.75843	0.033935	-2.2444	-0.44387	-0.94962
800	-180	60	-180	2.5	90	51.4979	58.9094	110.645	0	0	0	1.1809	0	0	1.9021	1.3365	0	0	-2.5	0	2.9707	1.137	0	1.6171	1.8945	-0.89257	1.6171	1.8946	0.89249	0.53946	-2.4556	0.93438	-0.986	-2.947	-0.012614	0.56238	-2.4528	-0.92053
801	-180	60	-180	2.5	270	61.2264	68.8248	105.614	0	0	0	1.1738	0	0	2.2657	0.96155	0	0	2.5	0	3.2009	0.40336	0	2.1936	1.5796	-0.8952	2.1927	1.5824	0.89333	-0.54192	2.4887	0.93863	0.86758	3.1467	-0.039759	-0.62067	2.4858	-0.88827
802	-180	60	-180	2.5	116.36	49.1973	56.0922	108.113	0	0	0	1.1764	0	0	1.9113	1.3263	0	-1.11	-2.24	0	2.9778	1.1168	0	1.6295	1.8855	-0.89269	1.6295	1.8855	0.89269	-0.69031	-2.6007	0.92877	-2.0998	-1.8073	0.004097	-0.69652	-2.5972	-0.93291
803	-180	60	-180	2.5	243.64	46.541	50.2269	106.864	0	0	0	1.1744	0	0	2.0225	1.2282	0	-1.11	2.24	0	3.0685	0.93079	0	1.7833	1.8077	-0.89236	1.783	1.8081	0.89211	-1.6148	2.0417	0.93596	-0.39946	3.0571	-0.024487	-1.6504	2.0173	-0.91018
804	-180	60	-180	2.5	96.8508	49.8345	56.6017	109.373	0	0	0	1.18	0	0	1.9026	1.3347	0	-0.29821	-2.4822	0	2.971	1.1342	0	1.6178	1.8927	-0.89255	1.6177	1.8928	0.8925	0.23668	-2.5586	0.93566	-1.3614	-2.6808	-0.013094	0.25977	-2.5585	-0.92204
805	-180	60	-180	2.5	145.558	54.5948	68.7582	106.916	0	0	0	1.1722	0	0	1.9423	1.3087	0	-2.0618	-1.4139	0	3.0031	1.073	0	1.6716	1.872	-0.8933	1.6716	1.8719	0.89338	-1.9259	-1.9649	0.92009	-2.5259	-0.44088	0.024744	-1.9309	-1.9195	-0.94641
806	-180	60	-180	2.5	214.442	51.2955	60.0108	107.352	0	0	0	1.1733	0	0	1.9887	1.2772	0	-2.0618	1.4139	0	3.0419	1.0087	0	1.735	1.8492	-0.893	1.735	1.8492	0.89302	-2.29	0.91792	0.9321	-1.9635	2.4924	-0.008384	-2.296	0.90392	-0.92296
807	-180	60	-180	2.5	263.149	54.3006	59.2822	106.206	0	0	0	1.1741	0	0	2.185	1.0571	0	-0.29821	2.4822	0	3.1679	0.58961	0	2.0503	1.6659	-0.8944	2.0493	1.6683	0.89275	-0.84028	2.4549	0.93781	0.56049	3.1397	-0.03888	-0.91081	2.4416	-0.89264
808	-180	60	-180	1.30503	180	52.1501	52.1818	87.5219	0	0	0	1.2211	0	0	1.8483	1.3897	0	-1.305	0	0	2.9319	1.2716	0	1.5316	1.9386	-0.89156	1.5316	1.9385	0.89166	-1.6843	-0.5189	0.89877	-1.8499	0.98097	-0.041687	-1.7041	-0.60949	-0.83295
809	-180	60	-180	1.30503	90	44.8248	44.9067	119.307	0	0	0	1.2921	0	0	1.8808	1.3592	0	0	-1.305	0	2.9665	1.2679	0	1.5609	1.9164	-0.88594	1.5613	1.914	0.8874	0.48847	-1.7921	0.84605	-1.0415	-1.7041	0.049245	0.38648	-1.7721	-0.91085
810	-180	60	-180	1.30503	270	84.9206	84.9969	134.473	0	0	0	1.3372	0	0	2.3944	0.98444	0	0	1.305	0	3.3196	0.41027	0	2.3923	1.6213	-0.89624	2.3715	1.6476	0.87639	-0.5225	1.696	0.905	0.79594	1.9964	-0.21536	-0.79908	1.6644	-0.71056
811	-180	60	-180	1.30503	116.36	11.1999	11.2697	80.3794	0	0	0	1.241	0	0	1.8051	1.3575	0	-0.57945	-1.1693	0	2.892	1.2842	0	1.4728	1.9046	-0.88684	1.4726	1.9052	0.88647	-0.31215	-1.7752	0.88082	-1.6698	-1.0825	-0.012026	-0.29221	-1.7878	-0.86568
812	-180	60	-180	1.30503	243.64	21.2015	21.2643	99.9043	0	0	0	1.2559	0	0	2.0683	1.2408	0	-0.57945	1.1693	0	3.1032	0.90542	0	1.9072	1.8595	-0.8897	1.9023	1.8594	0.88875	-1.21	1.2722	0.89942	0.029959	2.0729	-0.070236	-1.3258	1.2174	-0.80974
813	-180	60	-180	1.30503	96.8508	28.1547	28.2319	105.22	0	0	0	1.2733	0	0	1.8552	1.356	0	-0.15567	-1.2957	0	2.9413	1.2696	0	1.5334	1.9116	-0.88608	1.5336	1.9103	0.88694	0.28412	-1.8069	0.86191	-1.2247	-1.5788	0.022765	0.23899	-1.7951	-0.89132
814	-180	60	-180	1.30503	145.558	30.8992	30.9391	77.0179	0	0	0	1.2256	0	0	1.7846	1.3708	0	-1.0763	-0.73808	0	2.8724	1.3009	0	1.4415	1.9077	-0.88848	1.4411	1.9089	0.88763	-1.1374	-1.4009	0.8869	-1.999	-0.14506	-0.025201	-1.1185	-1.4489	-0.85169
815	-180	60	-180	1.30503	214.442	28.5661	28.609	87.3448	0	0	0	1.2267	0	0	1.8986	1.3647	0	-1.0763	0.73808	0	2.9736	1.196	0	1.6239	1.9406	-0.88902	1.624	1.9374	0.89113	-1.658	0.50503	0.90278	-0.99331	1.8538	-0.049889	-1.7248	0.42372	-0.82871
816	-180	60	-180	1.30503	263.149	58.9788	59.0774	121.377	0	0	0	1.3077	0	0	2.302	1.0637	0	-0.15567	1.2957	0	3.2601	0.54671	0	2.2634	1.7022	-0.89267	2.2478	1.7128	0.88376	-0.7195	1.6169	0.90326	0.62325	2.0229	-0.14673	-0.93079	1.58	-0.75125
817	-180	60	-180	2.29497	180	64.0526	83.7342	110.078	0	0	0	1.1734	0	0	2.0012	1.2794	0	-2.295	0	0	3.0511	0.99938	0	1.7541	1.8526	-0.89381	1.7541	1.8526	0.89381	-2.1367	-0.53411	0.9251	-3.0111	0.81666	0.00056618	-2.1368	-0.53285	-0.92584
818	-180	60	-180	2.29497	90	49.1984	50.6235	113.741	0	0	0	1.1936	0	0	1.8472	1.366	0	0	-2.295	0	2.9245	1.2174	0	1.5403	1.9149	-0.89152	1.5403	1.9152	0.89132	0.53994	-2.3329	0.9352	-0.99085	-2.7348	-0.023749	0.58345	-2.328	-0.90864
819	-180	60	-180	2.29497	270	64.5021	66.8211	110.619	0	0	0	1.1798	0	0	2.327	0.87718	0	0	2.295	0	3.2171	0.24996	0	2.3122	1.4967	-0.89776	2.3098	1.5023	0.89389	-0.53817	2.4404	0.93214	0.94998	2.8048	-0.049675	-0.62648	2.4428	-0.87476
820	-180	60	-180	2.29497	116.36	45.7059	47.0317	109.626	0	0	0	1.1841	0	0	1.8556	1.3522	0	-1.019	-2.0563	0	2.9308	1.1903	0	1.5519	1.9021	-0.89165	1.5519	1.9021	0.89166	-0.63061	-2.4706	0.9214	-2.0303	-1.674	0.006776	-0.64086	-2.4647	-0.92831
821	-180	60	-180	2.29497	243.64	42.2954	42.4673	107.669	0	0	0	1.1805	0	0	2.0356	1.2079	0	-1.019	2.0563	0	3.0795	0.9024	0	1.8049	1.7918	-0.89252	1.8043	1.7924	0.892	-1.5563	1.9288	0.93192	-0.3138	2.8788	-0.032233	-1.6034	1.8979	-0.89803
822	-180	60	-180	2.29497	96.8508	46.3485	47.4548	111.353	0	0	0	1.1912	0	0	1.8477	1.3624	0	-0.27376	-2.2786	0	2.9246	1.2116	0	1.5412	1.9115	-0.89148	1.5411	1.9117	0.89138	0.25123	-2.4277	0.93363	-1.334	-2.4985	-0.020902	0.28839	-2.4282	-0.91156
823	-180	60	-180	2.29497	145.558	56.2636	63.5102	111.674	0	0	0	1.1766	0	0	1.8984	1.3305	0	-1.8927	-1.298	0	2.9671	1.1323	0	1.6091	1.8862	-0.89248	1.6092	1.8858	0.89274	-1.8238	-1.8853	0.90645	-2.4036	-0.34889	0.038797	-1.8325	-1.8137	-0.94947
824	-180	60	-180	2.29497	214.442	50.8468	53.9977	110.916	0	0	0	1.178	0	0	1.9907	1.2743	0	-1.8927	1.298	0	3.045	1.0092	0	1.7374	1.8479	-0.89257	1.7374	1.8477	0.89273	-2.1777	0.83804	0.93611	-1.8163	2.3795	-0.026126	-2.1969	0.7942	-0.90684
825	-180	60	-180	2.29497	263.149	54.182	54.9684	109.109	0	0	0	1.1806	0	0	2.2345	0.99581	0	-0.27376	2.2786	0	3.1899	0.47435	0	2.1435	1.6106	-0.89656	2.1413	1.6146	0.89366	-0.82595	2.3766	0.92936	0.63983	2.8533	-0.042676	-0.89908	2.3659	-0.8828
826	-180	60	-180	1.15328	180	86.1165	86.1803	119.919	0	0	0	1.2229	0	0	1.8403	1.3835	0	-1.1533	0	0	2.9234	1.2666	0	1.5275	1.9362	-0.89106	1.5277	1.9365	0.89103	-1.5892	-0.51739	0.89614	-1.776	0.97356	-0.056602	-1.6261	-0.65269	-0.79162
827	-180	60	-180	1.15328	90	104.961	105.066	177.365	0	0	0	1.3288	0	0	1.9226	1.3531	0	0	-1.1533	0	3.0079	1.2533	0	1.6091	1.9178	-0.88445	1.6105	1.913	0.88759	0.46936	-1.7307	0.81296	-1.0551	-1.5706	0.076735	0.30117	-1.6883	-0.92207
828	-180	60	-180	1.15328	270	138.923	139.023	188.634	0	0	0	1.3858	0	0	2.3722	1.0449	0	0	1.1533	0	3.3286	0.52462	0	2.3345	1.6833	-0.89624	2.304	1.7153	0.87153	-0.52569	1.5874	0.91051	0.70818	1.9254	-0.29483	-0.91001	1.5276	-0.62315
829	-180	60	-180	1.15328	116.36	57.8868	57.9847	123.352	0	0	0	1.2556	0	0	1.8263	1.3502	0	-0.51208	-1.0334	0	2.9129	1.2698	0	1.5017	1.9037	-0.88678	1.5013	1.9055	0.88562	-0.26986	-1.6811	0.87404	-1.6166	-1.0193	-0.024673	-0.22612	-1.7094	-0.83895
830	-180	60	-180	1.15328	243.64	67.7654	67.8623	145.429	0	0	0	1.274	0	0	2.0642	1.2516	0	-0.51208	1.0334	0	3.1012	0.9229	0	1.9026	1.8755	-0.8873	1.8965	1.8727	0.88797	-1.1626	1.1792	0.89739	0.050554	1.9763	-0.090699	-1.3223	1.1091	-0.76461
831	-180	60	-180	1.53212	180	53.8072	53.7784	90.009	0	0	0	1.2234	0	0	1.8585	1.3954	0	-1.5321	0	0	2.9428	1.2771	0	1.5386	1.9417	-0.8918	1.5386	1.9413	0.89204	-1.8279	-0.52455	0.90856	-1.9792	1.0016	-0.029714	-1.8357	-0.58323	-0.86956
832	-180	60	-180	1.53212	90	20.0463	20.0628	95.4055	0	0	0	1.2632	0	0	1.8373	1.3704	0	0	-1.5321	0	2.9238	1.2916	0	1.5097	1.9196	-0.88735	1.5098	1.919	0.88768	0.51003	-1.9015	0.88339	-1.0318	-1.9151	0.014764	0.48063	-1.8982	-0.90167
833	-180	60	-180	1.53212	270	61.5942	61.6133	110.963	0	0	0	1.2936	0	0	2.4108	0.92776	0	0	1.5321	0	3.3028	0.30295	0	2.4451	1.5612	-0.89605	2.433	1.5774	0.88421	-0.52231	1.876	0.90467	0.89529	2.0987	-0.12568	-0.69086	1.8693	-0.792
834	-180	60	-180	1.53212	116.36	1.51018	1.51384	73.0192	0	0	0	1.2283	0	0	1.7833	1.3688	0	-0.68029	-1.3728	0	2.8704	1.3017	0	1.4444	1.9092	-0.88742	1.4443	1.9093	0.88741	-0.38116	-1.9285	0.89155	-1.7525	-1.1939	-0.000831	-0.37985	-1.9293	-0.89061
835	-180	60	-180	1.53212	243.64	9.22473	9.22248	87.7667	0	0	0	1.2371	0	0	2.0654	1.2265	0	-0.68029	1.3728	0	3.1018	0.89498	0	1.8945	1.8371	-0.89186	1.8912	1.8386	0.89019	-1.2872	1.4176	0.90749	-0.021687	2.2344	-0.051633	-1.3679	1.3758	-0.84856
836	-180	60	-180	2.06788	180	74.1217	85.8388	120.008	0	0	0	1.18	0	0	2.011	1.2833	0	-2.0679	0	0	3.0611	1.0025	0	1.766	1.8583	-0.89359	1.766	1.8576	0.89404	-1.9956	-0.53935	0.93418	-2.7827	0.82352	-0.022868	-1.9935	-0.59022	-0.90252
837	-180	60	-180	2.06788	90	39.9642	39.8718	109.834	0	0	0	1.2146	0	0	1.8014	1.3865	0	0	-2.0679	0	2.8855	1.2898	0	1.4747	1.9281	-0.89007	1.4746	1.9286	0.88975	0.53677	-2.1969	0.92972	-1.0026	-2.4866	-0.027016	0.58713	-2.1932	-0.89891
838	-180	60	-180	2.06788	270	64.8593	64.801	113.398	0	0	0	1.2004	0	0	2.3888	0.81873	0	0	2.0679	0	3.2362	0.13452	0	2.4366	1.439	-0.89832	2.4343	1.4436	0.89526	-0.52511	2.3543	0.90951	1.0066	2.4326	-0.031551	-0.57485	2.3605	-0.8771
839	-180	60	-180	2.06788	116.36	34.8995	34.7989	103.709	0	0	0	1.1975	0	0	1.7949	1.3756	0	-0.91817	-1.8529	0	2.8778	1.2693	0	1.4672	1.915	-0.89015	1.4672	1.915	0.89017	-0.55907	-2.3148	0.91257	-1.9481	-1.5202	0.008374	-0.57177	-2.3072	-0.92123
840	-180	60	-180	2.06788	243.64	32.9399	32.8581	104.125	0	0	0	1.1933	0	0	2.0457	1.2015	0	-0.91817	1.8529	0	3.0877	0.88834	0	1.8317	1.7923	-0.89291	1.8306	1.7934	0.89199	-1.4779	1.7782	0.9262	-0.21689	2.6787	-0.036273	-1.5319	1.7451	-0.88779
841	-180	60	-180	2.44672	180	59.5386	82.6533	105.126	0	0	0	1.1717	0	0	1.9949	1.2815	0	-2.4467	0	0	3.0456	1.0048	0	1.7454	1.8535	-0.89386	1.7454	1.8538	0.89371	-2.2176	-0.52723	0.91319	-3.1948	0.78485	0.023432	-2.2205	-0.47377	-0.94283
842	-180	60	-180	2.44672	90	51.2097	56.8975	111.717	0	0	0	1.1834	0	0	1.8897	1.3434	0	0	-2.4467	0	2.9604	1.1552	0	1.5998	1.8994	-0.89234	1.5998	1.8996	0.89224	0.53988	-2.4237	0.9351	-0.98719	-2.8919	-0.015484	0.56813	-2.4203	-0.91799
843	-180	60	-180	2.44672	270	62.1234	68.323	106.949	0	0	0	1.1748	0	0	2.2793	0.94193	0	0	2.4467	0	3.2051	0.36833	0	2.2191	1.5606	-0.89577	2.2179	1.5642	0.89333	-0.54208	2.4719	0.93891	0.88573	3.0672	-0.04493	-0.6292	2.4699	-0.88273
844	-180	60	-180	2.44672	116.36	48.6229	53.9095	108.807	0	0	0	1.178	0	0	1.8993	1.3321	0	-1.0864	-2.1923	0	2.9678	1.1328	0	1.6129	1.8894	-0.89247	1.6129	1.8894	0.89247	-0.67456	-2.5668	0.92714	-2.0822	-1.773	0.004735	-0.68174	-2.5627	-0.93194
845	-180	60	-180	2.44672	243.64	45.7628	48.2925	107.331	0	0	0	1.1755	0	0	2.0262	1.2227	0	-1.0864	2.1923	0	3.0715	0.9227	0	1.7892	1.8034	-0.89239	1.7889	1.8037	0.89208	-1.6	2.0125	0.93533	-0.37637	3.0101	-0.026783	-1.639	1.9862	-0.90713
846	-180	60	-60	1.8	180	77.2823	77.1912	114.613	0	0	0	1.2241	0	0	1.8988	1.3921	0	-1.8	0	0	1.5927	1.9434	-0.89348	1.5892	1.9448	0.89135	2.9805	1.2484	0.0021461	-1.962	-0.5347	0.92612	-2.212	1.006	-0.028425	-1.9628	-0.58856	-0.89247
847	-180	60	-60	1.8	90	26.1783	26.1298	100.015	0	0	0	1.2388	0	0	1.8043	1.3828	0	0	-1.8	0	1.4724	1.9261	-0.88836	1.4732	1.926	0.88874	2.8908	1.3071	-0.00045867	0.52719	-2.0441	0.91312	-1.021	-2.1857	-0.013039	0.55229	-2.0446	-0.89773
848	-180	60	-60	1.8	270	61.8597	61.8243	111.736	0	0	0	1.2445	0	0	2.4108	0.86266	0	0	1.8	0	2.4579	1.5238	-0.87216	2.4693	1.4681	0.91134	3.2718	0.19625	-0.025029	-0.52399	2.1061	0.90757	0.97345	2.2304	-0.051637	-0.60759	2.1207	-0.84945
849	-180	60	-60	1.8	116.36	17.1827	17.1203	88.8755	0	0	0	1.2138	0	0	1.7748	1.3778	0	-0.79923	-1.6128	0	1.4384	1.9141	-0.88985	1.4347	1.9159	0.88733	2.8609	1.3025	0.0022328	-0.46756	-2.1181	0.90329	-1.8499	-1.3464	0.005859	-0.47658	-2.1127	-0.90951
850	-180	60	-60	1.8	243.64	19.9511	19.9029	96.4172	0	0	0	1.2145	0	0	2.0561	1.2099	0	-0.79923	1.6128	0	1.8568	1.8187	-0.88549	1.8704	1.8047	0.8981	3.0956	0.88824	-0.0098841	-1.3814	1.5939	0.91812	-0.10865	2.4474	-0.040059	-1.4441	1.5601	-0.87351
851	-180	60	-60	1.8	96.8508	19.2141	19.1589	94.3428	0	0	0	1.2292	0	0	1.7968	1.3785	0	-0.21471	-1.7871	0	1.4653	1.9211	-0.88863	1.4652	1.9214	0.88839	2.8829	1.2999	9.2081e-05	0.2787	-2.1002	0.91319	-1.279	-2.0147	-0.014703	0.30571	-2.1034	-0.89675
852	-180	60	-60	1.8	145.558	43.8337	43.7688	98.5071	0	0	0	1.2095	0	0	1.7532	1.3901	0	-1.4845	-1.018	0	1.4047	1.9134	-0.89239	1.3948	1.9177	0.88588	2.841	1.327	0.0058484	-1.4933	-1.6458	0.88801	-2.1669	-0.18297	0.034071	-1.5112	-1.5858	-0.92676
853	-180	60	-60	1.8	214.442	35.8591	35.7902	101.532	0	0	0	1.2066	0	0	1.9578	1.3115	0	-1.4845	1.018	0	1.6941	1.8863	-0.89125	1.6941	1.8849	0.8921	3.0251	1.0974	-0.00020701	-1.9057	0.65516	0.93094	-1.399	2.1046	-0.048073	-1.9495	0.57504	-0.87291
854	-180	60	-60	1.8	263.149	42.9523	42.9237	104.359	0	0	0	1.2326	0	0	2.3093	0.97971	0	-0.21471	1.7871	0	2.2811	1.6365	-0.87436	2.3016	1.5874	0.91027	3.2338	0.40536	-0.024828	-0.771	2.0176	0.90901	0.71434	2.3177	-0.040547	-0.84245	2.0187	-0.86114
855	-180	60	-60	1.1	180	111.981	112.059	145.044	0	0	0	1.2249	0	0	1.8365	1.3807	0	-1.1	0	0	1.5219	1.937	-0.88843	1.529	1.9336	0.89311	2.9195	1.2653	-0.0044391	-1.5587	-0.51712	0.89569	-1.7527	0.97331	-0.065391	-1.604	-0.67834	-0.7697
856	-180	60	-60	1.1	90	141.857	141.975	213.199	0	0	0	1.3492	0	0	1.9423	1.3513	0	0	-1.1	0	1.6329	1.9181	-0.88515	1.6317	1.9143	0.8866	3.0275	1.2494	0.0013863	0.46139	-1.7129	0.79915	-1.0639	-1.5244	0.087466	0.26313	-1.6597	-0.92809
857	-180	60	-60	1.1	270	172.269	172.384	221.979	0	0	0	1.4126	0	0	2.364	1.0719	0	0	1.1	0	2.2922	1.7461	-0.86823	2.28	1.7195	0.89033	3.3353	0.58088	-0.0074241	-0.52837	1.5519	0.91516	0.67238	1.9008	-0.32133	-0.96174	1.4817	-0.58049
858	-180	60	-60	1.1	116.36	89.8673	89.9941	153.301	0	0	0	1.2635	0	0	1.8357	1.3479	0	-0.48842	-0.98562	0	1.5151	1.9037	-0.88727	1.5133	1.9069	0.88471	2.9222	1.2647	0.0010751	-0.25636	-1.651	0.87184	-1.5991	-0.99985	-0.030987	-0.19951	-1.6879	-0.82526
859	-180	60	-60	1.1	243.64	99.3287	99.4544	176.137	0	0	0	1.2831	0	0	2.0623	1.2553	0	-0.48842	0.98562	0	1.8766	1.9035	-0.86528	1.9104	1.8563	0.90554	3.1008	0.93289	-0.027764	-1.1476	1.1476	0.89835	0.054288	1.9452	-0.097232	-1.3292	1.0716	-0.74205
860	-180	60	-60	1.1	96.8508	119.867	120.031	192.801	0	0	0	1.3165	0	0	1.902	1.3487	0	-0.13121	-1.0921	0	1.59	1.9134	-0.88532	1.5881	1.9109	0.88601	2.9878	1.254	0.0012361	0.27639	-1.7095	0.8285	-1.2114	-1.4191	0.041654	0.18636	-1.6799	-0.8909
861	-180	60	-60	1.1	145.558	96.9816	97.0796	139.869	0	0	0	1.2343	0	0	1.8067	1.3578	0	-0.90717	-0.62212	0	1.4801	1.9053	-0.88965	1.4769	1.9096	0.88596	2.8932	1.2736	0.0019452	-1.0032	-1.3135	0.89357	-1.9277	-0.15013	-0.064542	-0.94542	-1.4516	-0.7862
862	-180	60	-60	1.1	214.442	96.1202	96.232	149.8	0	0	0	1.2368	0	0	1.8768	1.3723	0	-0.90717	0.62212	0	1.5904	1.9588	-0.87885	1.6127	1.9417	0.89693	2.9523	1.2112	-0.01477	-1.5635	0.44916	0.88994	-0.85628	1.7782	-0.059221	-1.6598	0.35101	-0.78462
863	-180	60	-60	1.1	263.149	144.874	145.041	206.53	0	0	0	1.3634	0	0	2.2786	1.1177	0	-0.13121	1.0921	0	2.185	1.7916	-0.86492	2.1902	1.7462	0.89996	3.2663	0.66102	-0.017504	-0.70746	1.465	0.91392	0.54349	1.9222	-0.21438	-1.0382	1.402	-0.64496
864	-180	60	-60	2.5	180	58.3116	82.346	103.737	0	0	0	1.1713	0	0	1.993	1.2822	0	-2.5	0	0	1.7447	1.8526	-0.89521	1.7411	1.8555	0.8923	3.0441	1.0066	0.0024789	-2.24	-0.5235	0.90673	-3.274	0.75841	0.033938	-2.2444	-0.44384	-0.94962
865	-180	60	-60	2.5	90	51.4979	58.9095	110.645	0	0	0	1.1809	0	0	1.9021	1.3365	0	0	-2.5	0	1.6174	1.8943	-0.89278	1.6168	1.8948	0.89226	2.9707	1.137	0.00042421	0.53946	-2.4556	0.93438	-0.986	-2.947	-0.012614	0.56238	-2.4528	-0.92053
866	-180	60	-60	2.5	270	61.227	68.8213	105.615	0	0	0	1.1738	0	0	2.2657	0.96145	0	0	2.5	0	2.1915	1.5828	-0.89271	2.1937	1.5799	0.89521	3.2011	0.40353	-0.001605	-0.54191	2.4876	0.93862	0.86736	3.147	-0.038919	-0.62064	2.4867	-0.8883
867	-180	60	-60	2.5	116.36	49.1972	56.0922	108.113	0	0	0	1.1764	0	0	1.9113	1.3263	0	-1.11	-2.24	0	1.6308	1.8846	-0.89362	1.6282	1.8864	0.89173	2.9778	1.1168	0.0016719	-0.69029	-2.6007	0.92877	-2.0998	-1.8073	0.004101	-0.69653	-2.5972	-0.93291
868	-180	60	-60	2.5	243.64	46.5406	50.2259	106.887	0	0	0	1.1743	0	0	2.0225	1.2282	0	-1.11	2.24	0	1.7897	1.8028	-0.89728	1.7763	1.8131	0.88695	3.0685	0.9309	0.0090962	-1.6151	2.0424	0.93593	-0.39952	3.0571	-0.024992	-1.6501	2.0166	-0.91018
869	-180	60	-60	2.5	96.8508	49.8345	56.6017	109.373	0	0	0	1.18	0	0	1.9026	1.3347	0	-0.29821	-2.4822	0	1.6183	1.8924	-0.89295	1.6172	1.8932	0.89209	2.971	1.1342	0.00074039	0.23669	-2.5586	0.93566	-1.3614	-2.6808	-0.013092	0.25977	-2.5585	-0.92204
870	-180	60	-60	2.5	145.558	54.5948	68.7583	106.916	0	0	0	1.1722	0	0	1.9423	1.3087	0	-2.0618	-1.4139	0	1.6736	1.8706	-0.89475	1.6696	1.8733	0.89189	3.0031	1.0731	0.0025801	-1.9258	-1.9648	0.92011	-2.5259	-0.44088	0.024734	-1.931	-1.9196	-0.9464
871	-180	60	-60	2.5	214.442	51.2955	60.0105	107.352	0	0	0	1.1733	0	0	1.9887	1.2772	0	-2.0618	1.4139	0	1.7386	1.8465	-0.89575	1.7312	1.8519	0.89018	3.0419	1.0088	0.0049521	-2.2901	0.91799	0.93211	-1.9635	2.4924	-0.008453	-2.2959	0.90385	-0.92295
872	-180	60	-60	2.5	263.149	54.3003	59.2798	106.206	0	0	0	1.174	0	0	2.185	1.0571	0	-0.29821	2.4822	0	2.0514	1.6651	-0.89506	2.0474	1.6694	0.89169	3.168	0.58979	0.0033372	-0.84033	2.4554	0.9378	0.56038	3.1398	-0.039277	-0.91083	2.4411	-0.8926
873	-180	60	-60	1.30503	180	52.1501	52.1818	87.5219	0	0	0	1.2211	0	0	1.8483	1.3897	0	-1.305	0	0	1.5314	1.9387	-0.89146	1.5318	1.9384	0.89178	2.9319	1.2716	-0.00029148	-1.6843	-0.5189	0.89877	-1.8499	0.98097	-0.041688	-1.7041	-0.60949	-0.83295
874	-180	60	-60	1.30503	90	44.8248	44.9067	119.307	0	0	0	1.2921	0	0	1.8808	1.3592	0	0	-1.305	0	1.5632	1.9151	-0.88758	1.559	1.9153	0.88575	2.9665	1.2679	0.0025621	0.48847	-1.7921	0.84605	-1.0415	-1.7041	0.049248	0.38649	-1.7721	-0.91085
875	-180	60	-60	1.30503	270	84.9679	85.0445	134.405	0	0	0	1.3371	0	0	2.3975	0.98005	0	0	1.305	0	2.3842	1.6519	-0.8701	2.38	1.617	0.89663	3.3223	0.40603	-0.011483	-0.52317	1.693	0.90616	0.79771	1.997	-0.20605	-0.79597	1.6675	-0.71192
876	-180	60	-60	1.30503	116.36	11.1998	11.2696	80.3793	0	0	0	1.241	0	0	1.8051	1.3575	0	-0.57945	-1.1693	0	1.4759	1.903	-0.88904	1.4692	1.9068	0.88412	2.892	1.2843	0.0040398	-0.31213	-1.7752	0.88083	-1.6698	-1.0825	-0.012003	-0.29222	-1.7878	-0.86567
877	-180	60	-60	1.30503	243.64	21.2155	21.279	99.9183	0	0	0	1.2559	0	0	2.0691	1.2401	0	-0.57945	1.1693	0	1.8881	1.8802	-0.87023	1.9203	1.8389	0.9055	3.1038	0.90531	-0.025548	-1.2097	1.2713	0.89973	0.029928	2.0731	-0.067458	-1.3256	1.2186	-0.80979
878	-180	60	-60	1.30503	96.8508	28.1547	28.232	105.22	0	0	0	1.2733	0	0	1.8552	1.356	0	-0.15567	-1.2957	0	1.5355	1.9104	-0.88761	1.5314	1.9114	0.88538	2.9413	1.2696	0.002488	0.28412	-1.8069	0.86191	-1.2247	-1.5788	0.022769	0.239	-1.7951	-0.89131
879	-180	60	-60	1.30503	145.558	30.8989	30.9388	77.0175	0	0	0	1.2256	0	0	1.7846	1.3708	0	-1.0763	-0.73808	0	1.4465	1.9052	-0.89189	1.4356	1.9115	0.88394	2.8724	1.301	0.0064038	-1.1373	-1.4009	0.88693	-1.999	-0.14507	-0.025129	-1.1186	-1.449	-0.85164
880	-180	60	-60	1.30503	214.442	28.5653	28.6082	87.344	0	0	0	1.2267	0	0	1.8986	1.3647	0	-1.0763	0.73808	0	1.6162	1.9456	-0.88333	1.6325	1.9322	0.89697	2.9736	1.1958	-0.01098	-1.658	0.50498	0.9028	-0.99332	1.8538	-0.049791	-1.7248	0.4237	-0.82866
881	-180	60	-60	1.30503	263.149	59.022	59.1212	121.351	0	0	0	1.3076	0	0	2.3046	1.0607	0	-0.15567	1.2957	0	2.2507	1.7335	-0.86613	2.2614	1.6818	0.90478	3.2622	0.54371	-0.021067	-0.71962	1.614	0.90405	0.62387	2.0235	-0.13986	-0.9287	1.5822	-0.75196
882	-180	60	-60	2.29497	180	64.0526	83.7341	110.078	0	0	0	1.1734	0	0	2.0012	1.2794	0	-2.295	0	0	1.7558	1.8514	-0.89509	1.7524	1.8539	0.89249	3.0511	0.9994	0.0023053	-2.1367	-0.53411	0.9251	-3.0111	0.81666	0.00056434	-2.1368	-0.53285	-0.92584
883	-180	60	-60	2.29497	90	49.1984	50.6235	113.741	0	0	0	1.1936	0	0	1.8472	1.366	0	0	-2.295	0	1.5397	1.9153	-0.89107	1.5409	1.9149	0.89177	2.9245	1.2174	-0.00072276	0.53994	-2.3329	0.9352	-0.99085	-2.7348	-0.023751	0.58345	-2.328	-0.90864
884	-180	60	-60	2.29497	270	64.5075	66.8269	110.602	0	0	0	1.1798	0	0	2.3271	0.87686	0	0	2.295	0	2.3062	1.5075	-0.88969	2.313	1.4934	0.90018	3.2176	0.25038	-0.0072424	-0.53845	2.4362	0.93262	0.94947	2.8061	-0.046477	-0.62641	2.4457	-0.87429
885	-180	60	-60	2.29497	116.36	45.7059	47.0317	109.626	0	0	0	1.1841	0	0	1.8556	1.3522	0	-1.019	-2.0563	0	1.553	1.9014	-0.89245	1.5508	1.9028	0.89084	2.9308	1.1903	0.001429	-0.63059	-2.4706	0.9214	-2.0303	-1.674	0.006783	-0.64087	-2.4647	-0.9283
886	-180	60	-60	2.29497	243.64	42.2949	42.4666	107.668	0	0	0	1.1805	0	0	2.0356	1.2079	0	-1.019	2.0563	0	1.811	1.7871	-0.89712	1.7979	1.7972	0.88712	3.0795	0.90254	0.0089027	-1.5565	1.9294	0.93185	-0.31388	2.8788	-0.032799	-1.6032	1.8972	-0.89804
887	-180	60	-60	2.29497	96.8508	46.3485	47.4548	111.353	0	0	0	1.1912	0	0	1.8477	1.3624	0	-0.27376	-2.2786	0	1.541	1.9116	-0.89137	1.5413	1.9116	0.89148	2.9246	1.2116	-0.00015105	0.25123	-2.4277	0.93363	-1.334	-2.4985	-0.020904	0.28839	-2.4282	-0.91156
888	-180	60	-60	2.29497	145.558	56.2635	63.51	111.674	0	0	0	1.1766	0	0	1.8984	1.3305	0	-1.8927	-1.298	0	1.6116	1.8846	-0.89429	1.6067	1.8874	0.8909	2.9671	1.1324	0.0031106	-1.8237	-1.8853	0.90648	-2.4036	-0.3489	0.038796	-1.8327	-1.8138	-0.94944
889	-180	60	-60	2.29497	214.442	50.8468	53.9976	110.916	0	0	0	1.178	0	0	1.9907	1.2743	0	-1.8927	1.298	0	1.7414	1.845	-0.89559	1.7333	1.8507	0.88962	3.045	1.0093	0.0053676	-2.1778	0.83812	0.93612	-1.8163	2.3795	-0.026206	-2.1968	0.79413	-0.90684
890	-180	60	-60	2.29497	263.149	54.1834	54.9701	109.11	0	0	0	1.1806	0	0	2.2345	0.99566	0	-0.27376	2.2786	0	2.14	1.6154	-0.89267	2.1427	1.6107	0.89652	3.1902	0.47479	-0.0022898	-0.82588	2.3748	0.9296	0.63916	2.8544	-0.04171	-0.89929	2.3664	-0.88262
891	-180	60	-60	1.15328	180	86.1165	86.1802	119.919	0	0	0	1.2229	0	0	1.8403	1.3835	0	-1.1533	0	0	1.5252	1.9375	-0.88942	1.5302	1.9351	0.89275	2.9234	1.2665	-0.0031483	-1.5892	-0.51738	0.89614	-1.776	0.97355	-0.05665	-1.6261	-0.6527	-0.79162
892	-180	60	-60	1.15328	90	104.961	105.066	177.365	0	0	0	1.3288	0	0	1.9226	1.3531	0	0	-1.1533	0	1.6113	1.9165	-0.88604	1.6086	1.9142	0.8861	3.0079	1.2533	0.0019642	0.46936	-1.7307	0.81295	-1.0551	-1.5706	0.076728	0.30119	-1.6883	-0.92207
893	-180	60	-60	1.15328	270	138.98	139.08	188.645	0	0	0	1.3855	0	0	2.3749	1.0409	0	0	1.1533	0	2.322	1.7139	-0.86954	2.3117	1.6875	0.89099	3.3317	0.52216	-0.0073207	-0.52625	1.585	0.9115	0.70962	1.9266	-0.28778	-0.9083	1.5297	-0.62393
894	-180	60	-60	1.15328	116.36	57.8867	57.9847	123.352	0	0	0	1.2556	0	0	1.8263	1.3502	0	-0.51208	-1.0334	0	1.5033	1.9029	-0.88789	1.4994	1.9063	0.8844	2.9128	1.2699	0.0022869	-0.26985	-1.6811	0.87404	-1.6166	-1.0193	-0.024658	-0.22613	-1.7094	-0.83894
895	-180	60	-60	1.15328	243.64	67.7813	67.8791	145.421	0	0	0	1.274	0	0	2.0652	1.2507	0	-0.51208	1.0334	0	1.8822	1.8972	-0.86649	1.9157	1.8511	0.90565	3.102	0.92273	-0.027321	-1.1624	1.1784	0.89772	0.050475	1.9766	-0.087843	-1.3223	1.11	-0.76456
896	-180	60	-60	1.53212	180	53.8072	53.7784	90.0091	0	0	0	1.2234	0	0	1.8585	1.3954	0	-1.5321	0	0	1.5402	1.9407	-0.89299	1.5369	1.9423	0.89083	2.9428	1.2771	0.0019624	-1.8279	-0.52456	0.90856	-1.9792	1.0016	-0.02968	-1.8357	-0.58319	-0.86958
897	-180	60	-60	1.53212	90	20.0463	20.0628	95.4055	0	0	0	1.2632	0	0	1.8373	1.3704	0	0	-1.5321	0	1.511	1.9188	-0.8883	1.5084	1.9197	0.8867	2.9238	1.2916	0.0016	0.51003	-1.9015	0.88339	-1.0318	-1.9151	0.014769	0.48063	-1.8982	-0.90166
898	-180	60	-60	1.53212	270	61.6373	61.6575	110.937	0	0	0	1.2935	0	0	2.4126	0.92471	0	0	1.5321	0	2.4368	1.5953	-0.86882	2.4408	1.5439	0.90617	3.3045	0.30041	-0.020241	-0.52287	1.8729	0.90564	0.8964	2.0985	-0.1176	-0.68786	1.8728	-0.79284
899	-180	60	-60	1.53212	116.36	1.51011	1.51378	73.0191	0	0	0	1.2283	0	0	1.7833	1.3688	0	-0.68029	-1.3728	0	1.4475	1.9076	-0.88961	1.441	1.9109	0.88509	2.8704	1.3017	0.0039061	-0.38113	-1.9284	0.89157	-1.7525	-1.1939	-0.000806	-0.37987	-1.9293	-0.89059
900	-180	60	-60	1.53212	243.64	9.23326	9.23169	87.7522	0	0	0	1.2371	0	0	2.0659	1.226	0	-0.68029	1.3728	0	1.8789	1.8533	-0.8768	1.9056	1.8228	0.90336	3.1022	0.89502	-0.020219	-1.2869	1.4167	0.90775	-0.021705	2.2346	-0.049386	-1.3678	1.377	-0.84863
901	-180	60	-60	2.06788	180	74.1217	85.8389	120.008	0	0	0	1.18	0	0	2.011	1.2833	0	-2.0679	0	0	1.7674	1.8573	-0.89463	1.7647	1.8586	0.893	3.0611	1.0024	0.0017241	-1.9956	-0.53935	0.93418	-2.7827	0.82352	-0.022867	-1.9935	-0.59021	-0.90252
902	-180	60	-60	2.06788	90	39.9642	39.8718	109.834	0	0	0	1.2146	0	0	1.8014	1.3865	0	0	-2.0679	0	1.4734	1.9288	-0.88918	1.4759	1.9279	0.89066	2.8855	1.2898	-0.0014873	0.53677	-2.1969	0.92972	-1.0026	-2.4866	-0.027023	0.58713	-2.1932	-0.89891
903	-180	60	-60	2.06788	270	64.8749	64.8167	113.367	0	0	0	1.2004	0	0	2.3897	0.81719	0	0	2.0679	0	2.4285	1.4614	-0.88157	2.4421	1.4219	0.90895	3.2369	0.13318	-0.020005	-0.52576	2.3496	0.91064	1.0074	2.4309	-0.023686	-0.57145	2.3672	-0.87699
904	-180	60	-60	2.06788	116.36	34.8995	34.7989	103.709	0	0	0	1.1975	0	0	1.7949	1.3756	0	-0.91817	-1.8529	0	1.4682	1.9144	-0.89088	1.4661	1.9155	0.8894	2.8778	1.2693	0.0013171	-0.55906	-2.3148	0.91258	-1.9481	-1.5202	0.008383	-0.57178	-2.3073	-0.92123
905	-180	60	-60	2.06788	243.64	32.9397	32.8579	104.125	0	0	0	1.1933	0	0	2.0457	1.2015	0	-0.91817	1.8529	0	1.8324	1.792	-0.89326	1.8294	1.7939	0.89137	3.0877	0.88847	0.0020036	-1.478	1.7782	0.9262	-0.21695	2.6788	-0.036361	-1.5319	1.745	-0.88778
906	-180	60	-60	2.44672	180	59.5386	82.6536	105.126	0	0	0	1.1717	0	0	1.9949	1.2815	0	-2.4467	0	0	1.7472	1.8522	-0.89519	1.7436	1.8551	0.89234	3.0456	1.0049	0.0024469	-2.2177	-0.52724	0.9132	-3.1948	0.78488	0.023411	-2.2205	-0.47381	-0.94282
907	-180	60	-60	2.44672	90	51.2097	56.8975	111.717	0	0	0	1.1834	0	0	1.8897	1.3434	0	0	-2.4467	0	1.5999	1.8994	-0.8924	1.5997	1.8997	0.89216	2.9604	1.1552	0.00016414	0.53988	-2.4237	0.9351	-0.98719	-2.8919	-0.015484	0.56813	-2.4203	-0.91799
908	-180	60	-60	2.44672	270	62.1245	68.3102	106.927	0	0	0	1.1748	0	0	2.2799	0.94115	0	0	2.4467	0	2.2173	1.5645	-0.89229	2.2203	1.56	0.89601	3.2055	0.36733	-0.0023984	-0.54208	2.4713	0.93892	0.88647	3.0662	-0.043572	-0.6288	2.4722	-0.88297
909	-180	60	-60	2.44672	116.36	48.6229	53.9094	108.807	0	0	0	1.178	0	0	1.8993	1.3321	0	-1.0864	-2.1923	0	1.6141	1.8886	-0.89337	1.6116	1.8902	0.89154	2.9678	1.1328	0.0016186	-0.67455	-2.5668	0.92715	-2.0822	-1.773	0.00474	-0.68175	-2.5627	-0.93193
910	-180	60	-60	2.44672	243.64	45.7624	48.2917	107.331	0	0	0	1.1755	0	0	2.0262	1.2227	0	-1.0864	2.1923	0	1.7957	1.7984	-0.89728	1.7822	1.8088	0.88694	3.0715	0.92282	0.0091167	-1.6003	2.0132	0.93529	-0.37643	3.0101	-0.027305	-1.6387	1.9855	-0.90713
911	-180	60	60	1.8	180	77.2823	77.1911	114.613	0	0	0	1.2241	0	0	1.8988	1.3921	0	-1.8	0	0	1.5923	1.9429	0.89365	2.9805	1.2485	-0.0018831	1.5894	1.9454	-0.89112	-1.962	-0.5347	0.92612	-2.212	1.006	-0.028449	-1.9628	-0.58858	-0.89246
912	-180	60	60	1.8	90	26.1783	26.1298	100.015	0	0	0	1.2388	0	0	1.8043	1.3828	0	0	-1.8	0	1.4726	1.9264	0.88829	2.8908	1.3071	0.00034909	1.4731	1.9258	-0.88883	0.52719	-2.0441	0.91312	-1.021	-2.1857	-0.013035	0.55229	-2.0446	-0.89772
913	-180	60	60	1.8	270	61.8183	61.7847	111.741	0	0	0	1.2446	0	0	2.4093	0.86529	0	0	1.8	0	2.4515	1.5249	0.87356	3.2704	0.19895	0.0313	2.4757	1.4665	-0.91338	-0.52286	2.1132	0.90561	0.97212	2.2314	-0.066892	-0.61372	2.112	-0.84857
914	-180	60	60	1.8	116.36	17.1827	17.1203	88.8755	0	0	0	1.2138	0	0	1.7748	1.3778	0	-0.79923	-1.6128	0	1.4384	1.9141	0.88986	2.8609	1.3025	-0.0022162	1.4347	1.916	-0.88731	-0.4676	-2.1181	0.90328	-1.8499	-1.3464	0.005828	-0.47654	-2.1127	-0.90953
915	-180	60	60	1.8	243.64	19.9476	19.8995	96.4137	0	0	0	1.2145	0	0	2.0559	1.2101	0	-0.79923	1.6128	0	1.8558	1.8183	0.88582	3.0953	0.88813	0.011644	1.8726	1.8046	-0.89867	-1.3818	1.595	0.91788	-0.10866	2.4473	-0.042047	-1.4441	1.5587	-0.87345
916	-180	60	60	1.8	96.8508	19.2141	19.1589	94.3428	0	0	0	1.2292	0	0	1.7968	1.3785	0	-0.21471	-1.7871	0	1.4655	1.9213	0.88857	2.8829	1.2999	-0.00019727	1.4651	1.9212	-0.88848	0.2787	-2.1002	0.91319	-1.279	-2.0147	-0.014704	0.30571	-2.1034	-0.89675
917	-180	60	60	1.8	145.558	43.8334	43.7685	98.5068	0	0	0	1.2095	0	0	1.7532	1.3901	0	-1.4845	-1.018	0	1.4044	1.9129	0.89252	2.841	1.3271	-0.0057551	1.3947	1.9182	-0.8856	-1.4936	-1.6459	0.88791	-2.1669	-0.18295	0.034016	-1.511	-1.5857	-0.92688
918	-180	60	60	1.8	214.442	35.8591	35.7903	101.532	0	0	0	1.2066	0	0	1.9578	1.3115	0	-1.4845	1.018	0	1.6934	1.8854	0.89157	3.0251	1.0975	0.00062223	1.6946	1.8859	-0.89166	-1.9057	0.65516	0.93094	-1.399	2.1046	-0.048083	-1.9495	0.57504	-0.87291
919	-180	60	60	1.8	263.149	42.9224	42.895	104.375	0	0	0	1.2327	0	0	2.3079	0.98149	0	-0.21471	1.7871	0	2.2765	1.6371	0.87533	3.2326	0.40731	0.029725	2.3062	1.5864	-0.91188	-0.77081	2.024	0.90737	0.71324	2.3185	-0.054229	-0.84702	2.0105	-0.86022
920	-180	60	60	1.1	180	111.981	112.059	145.044	0	0	0	1.2249	0	0	1.8365	1.3807	0	-1.1	0	0	1.5222	1.9375	0.88831	2.9195	1.2654	0.0037664	1.5284	1.9332	-0.89306	-1.5585	-0.51713	0.8957	-1.7527	0.97333	-0.065189	-1.6041	-0.67828	-0.7697
921	-180	60	60	1.1	90	141.857	141.975	213.222	0	0	0	1.3492	0	0	1.9422	1.3513	0	0	-1.1	0	1.6308	1.9146	0.88609	3.0275	1.2497	0.0019386	1.6329	1.9179	-0.88527	0.46139	-1.7129	0.79915	-1.0639	-1.5244	0.087471	0.26312	-1.6597	-0.92809
922	-180	60	60	1.1	270	172.186	172.299	221.827	0	0	0	1.4133	0	0	2.3598	1.0782	0	0	1.1	0	2.2709	1.7434	0.87576	3.3297	0.58307	0.022369	2.3157	1.7158	-0.89644	-0.52794	1.5537	0.91442	0.67111	1.8996	-0.32748	-0.96299	1.4801	-0.57978
923	-180	60	60	1.1	116.36	89.8674	89.9941	153.302	0	0	0	1.2635	0	0	1.8357	1.3479	0	-0.48842	-0.98562	0	1.5163	1.9055	0.8867	2.9222	1.2646	-0.0022872	1.5125	1.9051	-0.8854	-0.25637	-1.651	0.87184	-1.5991	-0.99985	-0.031008	-0.19951	-1.6878	-0.82526
924	-180	60	60	1.1	243.64	99.3151	99.4398	176.101	0	0	0	1.283	0	0	2.0611	1.2563	0	-0.48842	0.98562	0	1.8691	1.8985	0.86837	3.0996	0.93382	0.032092	1.9175	1.8616	-0.90387	-1.1479	1.1493	0.8977	0.054092	1.9448	-0.10326	-1.3294	1.0699	-0.74214
925	-180	60	60	1.1	96.8508	119.867	120.031	192.801	0	0	0	1.3165	0	0	1.902	1.3487	0	-0.13121	-1.0921	0	1.5883	1.9107	0.88617	2.9878	1.2541	0.00079066	1.5893	1.9137	-0.88495	0.27639	-1.7095	0.8285	-1.2114	-1.4191	0.041655	0.18635	-1.6799	-0.8909
926	-180	60	60	1.1	145.558	96.9818	97.0799	139.869	0	0	0	1.2343	0	0	1.8067	1.3578	0	-0.90717	-0.62212	0	1.4814	1.9074	0.88901	2.8932	1.2735	-0.0031339	1.4761	1.9074	-0.88682	-1.0032	-1.3136	0.89357	-1.9277	-0.15015	-0.064633	-0.94535	-1.4516	-0.7862
927	-180	60	60	1.1	214.442	96.1239	96.2352	149.78	0	0	0	1.2368	0	0	1.8768	1.3723	0	-0.90717	0.62212	0	1.5888	1.9565	0.8798	2.9523	1.2116	0.01479	1.6127	1.9443	-0.8953	-1.5635	0.44923	0.88991	-0.85625	1.7782	-0.059634	-1.6597	0.35117	-0.78481
928	-180	60	60	1.1	263.149	144.812	144.976	206.468	0	0	0	1.3635	0	0	2.2752	1.1216	0	-0.13121	1.0921	0	2.1661	1.7851	0.87156	3.2624	0.66361	0.027981	2.2129	1.7509	-0.90025	-0.70713	1.4679	0.91276	0.54222	1.921	-0.22351	-1.0398	1.3994	-0.64432
929	-180	60	60	2.5	180	58.3116	82.3464	103.737	0	0	0	1.1713	0	0	1.993	1.2822	0	-2.5	0	0	1.7448	1.8527	0.89515	3.0441	1.0066	-0.0025724	1.741	1.8554	-0.89238	-2.24	-0.5235	0.90673	-3.274	0.75844	0.033942	-2.2445	-0.44388	-0.94962
930	-180	60	60	2.5	90	51.4979	58.9095	110.645	0	0	0	1.1809	0	0	1.9021	1.3365	0	0	-2.5	0	1.6175	1.8944	0.89276	2.9707	1.137	-0.00044738	1.6168	1.8947	-0.8923	0.53946	-2.4556	0.93438	-0.986	-2.947	-0.012615	0.56238	-2.4528	-0.92053
931	-180	60	60	2.5	270	61.2261	68.8263	105.614	0	0	0	1.1738	0	0	2.2657	0.96162	0	0	2.5	0	2.1917	1.5833	0.89273	3.2008	0.40324	0.0035288	2.1953	1.5783	-0.89624	-0.54192	2.4893	0.93864	0.86771	3.1464	-0.040202	-0.62069	2.4854	-0.88825
932	-180	60	60	2.5	116.36	49.1972	56.0923	108.113	0	0	0	1.1764	0	0	1.9113	1.3263	0	-1.11	-2.24	0	1.6308	1.8846	0.89362	2.9778	1.1168	-0.0016712	1.6282	1.8864	-0.89173	-0.69032	-2.6007	0.92877	-2.0998	-1.8073	0.004092	-0.6965	-2.5971	-0.93291
933	-180	60	60	2.5	243.64	46.541	50.227	106.864	0	0	0	1.1744	0	0	2.0225	1.2282	0	-1.11	2.24	0	1.7898	1.8028	0.89729	3.0685	0.93079	-0.0089125	1.7765	1.813	-0.88706	-1.6144	2.0409	0.93599	-0.3995	3.0571	-0.023973	-1.6507	2.0181	-0.91018
934	-180	60	60	2.5	96.8508	49.8345	56.6017	109.373	0	0	0	1.18	0	0	1.9026	1.3347	0	-0.29821	-2.4822	0	1.6183	1.8924	0.89293	2.971	1.1342	-0.00075475	1.6171	1.8931	-0.89211	0.23668	-2.5586	0.93566	-1.3614	-2.6808	-0.013096	0.25977	-2.5585	-0.92204
935	-180	60	60	2.5	145.558	54.5948	68.7583	106.916	0	0	0	1.1722	0	0	1.9423	1.3087	0	-2.0618	-1.4139	0	1.6735	1.8706	0.89477	3.0031	1.0731	-0.002553	1.6697	1.8734	-0.89185	-1.926	-1.9649	0.92008	-2.5259	-0.44088	0.024753	-1.9308	-1.9195	-0.94643
936	-180	60	60	2.5	214.442	51.2954	60.0103	107.352	0	0	0	1.1733	0	0	1.9887	1.2772	0	-2.0618	1.4139	0	1.7386	1.8465	0.89576	3.0419	1.0088	-0.0049419	1.7312	1.8519	-0.89017	-2.2899	0.91785	0.93209	-1.9635	2.4924	-0.008315	-2.2962	0.90398	-0.92297
937	-180	60	60	2.5	263.149	54.3011	59.2846	106.184	0	0	0	1.1741	0	0	2.185	1.0571	0	-0.29821	2.4822	0	2.0516	1.6654	0.8951	3.1678	0.58939	-0.0017765	2.049	1.6683	-0.89256	-0.8402	2.4542	0.93783	0.56065	3.1395	-0.038201	-0.9108	2.4424	-0.89268
938	-180	60	60	1.30503	180	52.1501	52.1818	87.5219	0	0	0	1.2211	0	0	1.8483	1.3897	0	-1.305	0	0	1.5314	1.9386	0.89149	2.9319	1.2717	0.00017218	1.5317	1.9385	-0.89171	-1.6843	-0.51891	0.89877	-1.8499	0.98097	-0.041678	-1.7041	-0.60949	-0.83295
939	-180	60	60	1.30503	90	44.8247	44.9066	119.307	0	0	0	1.2921	0	0	1.8808	1.3592	0	0	-1.305	0	1.5622	1.9136	0.88803	2.9665	1.268	-0.0014379	1.5598	1.9169	-0.88521	0.48847	-1.7921	0.84605	-1.0415	-1.7041	0.049242	0.38648	-1.7721	-0.91085
940	-180	60	60	1.30503	270	84.897	84.9736	134.426	0	0	0	1.3373	0	0	2.3938	0.98588	0	0	1.305	0	2.3674	1.6519	0.87455	3.3181	0.41045	0.024681	2.4015	1.6139	-0.90169	-0.52242	1.6964	0.90485	0.79586	1.9962	-0.21654	-0.79932	1.664	-0.71057
941	-180	60	60	1.30503	116.36	11.1999	11.2696	80.3794	0	0	0	1.241	0	0	1.8051	1.3575	0	-0.57945	-1.1693	0	1.4762	1.9033	0.88894	2.892	1.2843	-0.0042536	1.469	1.9065	-0.88426	-0.31217	-1.7753	0.88081	-1.6698	-1.0825	-0.012049	-0.2922	-1.7878	-0.8657
942	-180	60	60	1.30503	243.64	21.1998	21.2623	99.9026	0	0	0	1.2559	0	0	2.0682	1.2409	0	-0.57945	1.1693	0	1.8836	1.8778	0.87183	3.1029	0.9059	0.029292	1.9254	1.841	-0.90543	-1.2102	1.2731	0.89913	0.029697	2.0729	-0.073039	-1.3261	1.2162	-0.80962
943	-180	60	60	1.30503	96.8508	28.1546	28.2319	105.22	0	0	0	1.2733	0	0	1.8552	1.356	0	-0.15567	-1.2957	0	1.535	1.9095	0.88788	2.9413	1.2696	-0.0018892	1.5318	1.9124	-0.88504	0.28411	-1.8069	0.86191	-1.2247	-1.5788	0.022761	0.23899	-1.7951	-0.89132
944	-180	60	60	1.30503	145.558	30.8992	30.9391	77.0179	0	0	0	1.2256	0	0	1.7846	1.3708	0	-1.0763	-0.73808	0	1.4469	1.9059	0.89171	2.8724	1.3009	-0.0066586	1.4356	1.9107	-0.88428	-1.1375	-1.401	0.88686	-1.999	-0.14506	-0.025282	-1.1184	-1.4488	-0.85175
945	-180	60	60	1.30503	214.442	28.5665	28.6093	87.3453	0	0	0	1.2267	0	0	1.8986	1.3647	0	-1.0763	0.73808	0	1.6147	1.9436	0.8841	2.9736	1.196	0.01145	1.6332	1.9343	-0.89589	-1.6581	0.50507	0.90276	-0.99329	1.8538	-0.049988	-1.7247	0.42373	-0.82877
946	-180	60	60	1.30503	263.149	58.9576	59.0551	121.355	0	0	0	1.3076	0	0	2.3018	1.0643	0	-0.15567	1.2957	0	2.2369	1.7308	0.87015	3.2591	0.54673	0.031638	2.2773	1.6828	-0.90674	-0.71928	1.6179	0.90266	0.62245	2.0229	-0.15136	-0.9317	1.5778	-0.751
947	-180	60	60	2.29497	180	64.0526	83.7342	110.078	0	0	0	1.1734	0	0	2.0012	1.2794	0	-2.295	0	0	1.7558	1.8514	0.89509	3.0511	0.9994	-0.0023091	1.7524	1.8539	-0.89249	-2.1367	-0.53411	0.9251	-3.0111	0.81666	0.00057044	-2.1368	-0.53286	-0.92584
948	-180	60	60	2.29497	90	49.1984	50.6235	113.741	0	0	0	1.1936	0	0	1.8472	1.366	0	0	-2.295	0	1.5398	1.9155	0.891	2.9245	1.2174	0.00065248	1.5408	1.9146	-0.89186	0.53993	-2.3329	0.93519	-0.99086	-2.7348	-0.023746	0.58345	-2.328	-0.90864
949	-180	60	60	2.29497	270	64.4991	66.8193	110.616	0	0	0	1.1798	0	0	2.3269	0.8774	0	0	2.295	0	2.3054	1.5079	0.89005	3.2169	0.25003	0.011671	2.3174	1.4904	-0.90218	-0.53802	2.4426	0.93187	0.94995	2.8045	-0.051777	-0.6273	2.4404	-0.87457
950	-180	60	60	2.29497	116.36	45.7059	47.0317	109.626	0	0	0	1.1841	0	0	1.8556	1.3522	0	-1.019	-2.0563	0	1.553	1.9014	0.89245	2.9308	1.1903	-0.0014277	1.5508	1.9028	-0.89083	-0.63062	-2.4707	0.92139	-2.0303	-1.674	0.006769	-0.64085	-2.4646	-0.92831
951	-180	60	60	2.29497	243.64	42.2957	42.4678	107.669	0	0	0	1.1805	0	0	2.0356	1.2079	0	-1.019	2.0563	0	1.811	1.787	0.89716	3.0795	0.90232	-0.0084276	1.7986	1.797	-0.88736	-1.556	1.9281	0.93199	-0.31379	2.8788	-0.031634	-1.6036	1.8986	-0.89801
952	-180	60	60	2.29497	96.8508	46.3485	47.4548	111.353	0	0	0	1.1912	0	0	1.8477	1.3624	0	-0.27376	-2.2786	0	1.5411	1.9117	0.89134	2.9246	1.2116	0.00010937	1.5412	1.9115	-0.89153	0.25123	-2.4277	0.93363	-1.334	-2.4985	-0.020902	0.28839	-2.4282	-0.91156
953	-180	60	60	2.29497	145.558	56.2635	63.5099	111.674	0	0	0	1.1766	0	0	1.8984	1.3305	0	-1.8927	-1.298	0	1.6114	1.8844	0.89435	2.9671	1.1324	-0.0030373	1.6067	1.8877	-0.89079	-1.8239	-1.8854	0.90642	-2.4036	-0.34889	0.038798	-1.8325	-1.8136	-0.9495
954	-180	60	60	2.29497	214.442	50.8467	53.9976	110.916	0	0	0	1.178	0	0	1.9907	1.2743	0	-1.8927	1.298	0	1.7412	1.8448	0.89563	3.045	1.0093	-0.0052962	1.7334	1.8508	-0.88956	-2.1775	0.83797	0.93611	-1.8163	2.3795	-0.02605	-2.197	0.79427	-0.90684
955	-180	60	60	2.29497	263.149	54.181	54.969	109.108	0	0	0	1.1807	0	0	2.2344	0.99595	0	-0.27376	2.2786	0	2.1396	1.6156	0.89291	3.1897	0.47434	0.0053509	2.146	1.6089	-0.898	-0.82597	2.3768	0.92934	0.63957	2.8536	-0.04334	-0.89933	2.3649	-0.88274
956	-180	60	60	1.15328	180	86.1166	86.1803	119.919	0	0	0	1.2229	0	0	1.8403	1.3835	0	-1.1533	0	0	1.5254	1.9378	0.88935	2.9234	1.2666	0.002664	1.5298	1.9348	-0.89273	-1.5891	-0.51739	0.89615	-1.776	0.97356	-0.056545	-1.6262	-0.65267	-0.79162
957	-180	60	60	1.15328	90	104.961	105.066	177.365	0	0	0	1.3288	0	0	1.9226	1.3531	0	0	-1.1533	0	1.6095	1.9136	0.88682	3.0079	1.2534	0.00051917	1.6098	1.9172	-0.88509	0.46936	-1.7307	0.81295	-1.0551	-1.5706	0.07673	0.30117	-1.6883	-0.92207
958	-180	60	60	1.15328	270	138.905	139.005	188.571	0	0	0	1.386	0	0	2.3709	1.047	0	0	1.1533	0	2.3025	1.7123	0.87585	3.3265	0.52506	0.021977	2.3423	1.6832	-0.89715	-0.52569	1.5873	0.91053	0.70802	1.9254	-0.29514	-0.91012	1.5276	-0.62309
959	-180	60	60	1.15328	116.36	57.8868	57.9848	123.352	0	0	0	1.2556	0	0	1.8263	1.3502	0	-0.51208	-1.0334	0	1.504	1.9041	0.88752	2.9128	1.2698	-0.0030634	1.4989	1.9051	-0.88486	-0.26987	-1.6811	0.87403	-1.6166	-1.0193	-0.024689	-0.22613	-1.7093	-0.83895
960	-180	60	60	1.15328	243.64	67.7659	67.8629	145.406	0	0	0	1.2739	0	0	2.0641	1.2517	0	-0.51208	1.0334	0	1.8755	1.893	0.86911	3.1008	0.92362	0.031616	1.9223	1.8554	-0.90455	-1.1628	1.18	0.89707	0.050283	1.9762	-0.093767	-1.3225	1.1081	-0.76457
961	-180	60	60	1.53212	180	53.8072	53.7783	90.009	0	0	0	1.2234	0	0	1.8585	1.3954	0	-1.5321	0	0	1.54	1.9404	0.89307	2.9428	1.2771	-0.0018885	1.537	1.9425	-0.89072	-1.8279	-0.52455	0.90856	-1.9792	1.0016	-0.029728	-1.8357	-0.58323	-0.86956
962	-180	60	60	1.53212	90	20.0462	20.0628	95.4055	0	0	0	1.2632	0	0	1.8373	1.3704	0	0	-1.5321	0	1.5108	1.9185	0.88841	2.9238	1.2916	-0.0013841	1.5085	1.9201	-0.88657	0.51002	-1.9015	0.88339	-1.0318	-1.9151	0.01476	0.48063	-1.8982	-0.90167
963	-180	60	60	1.53212	270	61.5704	61.5905	111.008	0	0	0	1.2936	0	0	2.4099	0.9293	0	0	1.5321	0	2.4241	1.5961	0.87183	3.3016	0.30476	0.030618	2.4542	1.542	-0.90948	-0.52195	1.8779	0.90405	0.89439	2.0989	-0.13126	-0.69314	1.867	-0.79118
964	-180	60	60	1.53212	116.36	1.51011	1.51378	73.0191	0	0	0	1.2283	0	0	1.7833	1.3688	0	-0.68029	-1.3728	0	1.4475	1.9076	0.8896	2.8704	1.3017	-0.0039129	1.441	1.9109	-0.8851	-0.38119	-1.9285	0.89154	-1.7525	-1.1939	-0.000856	-0.37983	-1.9292	-0.89063
965	-180	60	60	1.53212	243.64	9.22267	9.21984	87.7646	0	0	0	1.2371	0	0	2.0654	1.2265	0	-0.68029	1.3728	0	1.8766	1.8523	0.87756	3.1016	0.89527	0.022932	1.909	1.8234	-0.90387	-1.2875	1.4184	0.90726	-0.021897	2.2344	-0.053826	-1.3682	1.3746	-0.8484
966	-180	60	60	2.06788	180	74.1216	85.8387	120.008	0	0	0	1.18	0	0	2.011	1.2833	0	-2.0679	0	0	1.767	1.8569	0.89478	3.0611	1.0025	-0.00148	1.765	1.8591	-0.8928	-1.9956	-0.53935	0.93418	-2.7827	0.82352	-0.022868	-1.9935	-0.59022	-0.90252
967	-180	60	60	2.06788	90	39.9642	39.8718	109.834	0	0	0	1.2146	0	0	1.8014	1.3865	0	0	-2.0679	0	1.4736	1.9291	0.88907	2.8855	1.2897	0.0013569	1.4758	1.9275	-0.8908	0.53677	-2.1969	0.92972	-1.0026	-2.4866	-0.02701	0.58713	-2.1932	-0.89891
968	-180	60	60	2.06788	270	64.8581	64.8002	113.374	0	0	0	1.2005	0	0	2.3887	0.81863	0	0	2.0679	0	2.4251	1.4622	0.88224	3.2363	0.13509	0.023514	2.4444	1.4206	-0.91025	-0.52457	2.358	0.90859	1.0056	2.4347	-0.039446	-0.57917	2.3543	-0.87639
969	-180	60	60	2.06788	116.36	34.8995	34.7989	103.709	0	0	0	1.1975	0	0	1.7949	1.3756	0	-0.91817	-1.8529	0	1.4682	1.9144	0.89089	2.8778	1.2693	-0.0013078	1.4661	1.9156	-0.88939	-0.55909	-2.3148	0.91257	-1.9481	-1.5202	0.008366	-0.57175	-2.3072	-0.92124
970	-180	60	60	2.06788	243.64	32.94	32.8582	104.125	0	0	0	1.1933	0	0	2.0457	1.2015	0	-0.91817	1.8529	0	1.8322	1.7919	0.89339	3.0876	0.88819	-0.0010297	1.8307	1.7936	-0.89179	-1.4779	1.778	0.92622	-0.21683	2.6787	-0.036103	-1.5319	1.7453	-0.88779
971	-180	60	60	2.44672	180	59.5386	82.6538	105.126	0	0	0	1.1717	0	0	1.9949	1.2815	0	-2.4467	0	0	1.7473	1.8523	0.89514	3.0456	1.0049	-0.0025196	1.7435	1.855	-0.8924	-2.2177	-0.52723	0.91319	-3.1948	0.7849	0.023425	-2.2205	-0.47381	-0.94282
972	-180	60	60	2.44672	90	51.2097	56.8975	111.717	0	0	0	1.1834	0	0	1.8897	1.3434	0	0	-2.4467	0	1.5999	1.8995	0.89237	2.9604	1.1552	-0.00019612	1.5996	1.8996	-0.89221	0.53988	-2.4237	0.9351	-0.98719	-2.8919	-0.015485	0.56814	-2.4203	-0.91799
973	-180	60	60	2.44672	270	62.1226	68.3133	106.926	0	0	0	1.1748	0	0	2.2798	0.94138	0	0	2.4467	0	2.2174	1.565	0.89238	3.2051	0.36695	0.005	2.2226	1.558	-0.89734	-0.54206	2.4739	0.93887	0.88695	3.0654	-0.045571	-0.62893	2.4703	-0.88292
974	-180	60	60	2.44672	116.36	48.6229	53.9094	108.807	0	0	0	1.178	0	0	1.8993	1.3321	0	-1.0864	-2.1923	0	1.6141	1.8886	0.89337	2.9678	1.1328	-0.0016178	1.6116	1.8902	-0.89154	-0.67458	-2.5668	0.92714	-2.0822	-1.773	0.00473	-0.68172	-2.5627	-0.93194
975	-180	60	60	2.44672	243.64	45.7629	48.2928	107.331	0	0	0	1.1755	0	0	2.0262	1.2227	0	-1.0864	2.1923	0	1.7957	1.7984	0.89729	3.0715	0.92268	-0.0088739	1.7826	1.8086	-0.88708	-1.5996	2.0118	0.93537	-0.3764	3.0101	-0.026248	-1.6393	1.9869	-0.90712
976	-180	-140	-180	1.8	180	78.0588	77.9714	113.545	0	0	0	1.2259	0	0	1.8856	1.3966	0	-1.8	0	0	2.9693	1.2651	0	1.5705	1.9495	-0.88963	1.5714	1.9414	0.8946	-2.1263	0.79232	-0.66484	-2.006	-1.0037	-0.3436	-2.0076	0.1761	1.0481
977	-180	-140	-180	1.8	90	27.3895	27.3424	101.665	0	0	0	1.2422	0	0	1.8008	1.3884	0	0	-1.8	0	2.8878	1.3181	0	1.4673	1.9263	-0.89095	1.4666	1.9338	0.88642	-0.79081	-2.1527	-0.66357	0.99208	-2.0486	-0.34126	-0.18973	-2.0785	1.0344
978	-180	-140	-180	1.8	270	55.8323	55.8142	109.744	0	0	0	1.2429	0	0	2.3774	0.91186	0	0	1.8	0	3.2612	0.27584	0	2.4283	1.5244	-0.90626	2.3923	1.5729	0.87136	0.77701	2.1495	-0.65199	-0.97129	2.2151	-0.27689	0.20322	2.0395	1.0411
979	-180	-140	-180	1.8	116.36	16.6873	16.6226	89.6945	0	0	0	1.214	0	0	1.7755	1.3779	0	-0.79923	-1.6128	0	2.8616	1.3019	0	1.4382	1.9139	-0.88963	1.4374	1.9168	0.88765	-1.6308	-1.4634	-0.68089	-0.073371	-2.3545	-0.32389	-1.1191	-1.7358	1.0312
980	-180	-140	-180	1.8	243.64	19.2274	19.1719	95.9011	0	0	0	1.2148	0	0	2.0322	1.2272	0	-0.79923	1.6128	0	3.0796	0.93247	0	1.8314	1.8201	-0.89599	1.815	1.8316	0.88468	-0.27922	2.31	-0.65071	-1.7997	1.377	-0.34617	-0.79594	1.9397	1.0385
981	-180	-140	-180	1.8	96.8508	19.4339	19.3802	95.7155	0	0	0	1.2313	0	0	1.7955	1.381	0	-0.21471	-1.7871	0	2.8818	1.3048	0	1.4635	1.92	-0.89053	1.4626	1.9262	0.88657	-1.0428	-2.0209	-0.66646	0.74635	-2.1506	-0.33698	-0.43931	-2.0388	1.0339
982	-180	-140	-180	1.8	145.558	42.4382	42.3706	100.363	0	0	0	1.2086	0	0	1.7538	1.3894	0	-1.4845	-1.018	0	2.8413	1.3248	0	1.4033	1.9124	-0.89158	1.4004	1.9192	0.8868	-2.0414	-0.40063	-0.69156	-1.3827	-2.0647	-0.28681	-1.785	-0.8723	1.0322
983	-180	-140	-180	1.8	214.442	36.9185	36.8453	100.217	0	0	0	1.2072	0	0	1.9578	1.3146	0	-1.4845	1.018	0	3.0255	1.1026	0	1.693	1.8935	-0.8885	1.6926	1.8836	0.89452	-1.4533	1.9068	-0.62985	-2.132	0.24115	-0.38127	-1.6498	1.2373	1.0515
984	-180	-140	-180	1.8	263.149	38.9354	38.9177	103.041	0	0	0	1.2325	0	0	2.2725	1.0218	0	-0.21471	1.7871	0	3.2185	0.48355	0	2.2489	1.6344	-0.9058	2.2134	1.6763	0.87369	0.51675	2.2315	-0.65386	-1.2326	2.0326	-0.29865	-0.053853	2.0693	1.0387
985	-180	-140	-180	1.1	180	112.16	112.238	145.5	0	0	0	1.2256	0	0	1.8265	1.3826	0	-1.1	0	0	2.9108	1.2802	0	1.5064	1.9403	-0.88631	1.5095	1.9295	0.89414	-1.6528	0.77866	-0.65337	-1.7294	-0.96712	-0.17864	-1.5302	0.35106	0.97733
986	-180	-140	-180	1.1	90	136.187	136.286	217.029	0	0	0	1.3699	0	0	1.9402	1.3693	0	0	-1.1	0	3.027	1.2774	0	1.6303	1.9265	-0.89038	1.6286	1.9363	0.88414	-0.81901	-1.5245	-0.68723	0.83174	-1.8032	-0.10853	-0.58896	-1.5182	0.89378
987	-180	-140	-180	1.1	270	168.443	168.578	213.864	0	0	0	1.4167	0	0	2.3257	1.0804	0	0	1.1	0	3.3203	0.63898	0	2.2217	1.7556	-0.87219	2.1873	1.7419	0.88011	0.63718	1.8336	-0.53466	-1.0441	1.5381	-0.2438	0.028395	1.5979	1.0296
988	-180	-140	-180	1.1	116.36	84.6063	84.729	158.418	0	0	0	1.2637	0	0	1.8367	1.3499	0	-0.48842	-0.98562	0	2.9229	1.2648	0	1.5174	1.9014	-0.89002	1.5159	1.9136	0.88238	-1.3938	-1.062	-0.65223	0.12854	-1.905	-0.16462	-1.0418	-1.189	0.95719
989	-180	-140	-180	1.1	243.64	98.4599	98.581	172.178	0	0	0	1.2865	0	0	2.0004	1.2729	0	-0.48842	0.98562	0	3.0603	1.0317	0	1.7779	1.8988	-0.87851	1.76	1.8867	0.88241	-0.07449	1.8207	-0.62233	-1.5804	0.99609	-0.22527	-0.49205	1.5064	1.0006
990	-180	-140	-180	1.1	96.8508	113.843	113.993	199.76	0	0	0	1.3272	0	0	1.9013	1.3607	0	-0.13121	-1.0921	0	2.9877	1.2698	0	1.5898	1.9159	-0.89083	1.5882	1.9292	0.88249	-0.97904	-1.4378	-0.67174	0.67358	-1.8282	-0.12846	-0.69481	-1.454	0.92092
991	-180	-140	-180	1.1	145.558	94.0992	94.2001	140.907	0	0	0	1.2334	0	0	1.8035	1.3583	0	-0.90717	-0.62212	0	2.89	1.2767	0	1.4743	1.9048	-0.88926	1.4735	1.9106	0.88577	-1.7548	-0.26748	-0.64769	-0.85016	-1.7661	-0.1774	-1.4593	-0.55854	0.97129
992	-180	-140	-180	1.1	214.442	97.9418	98.057	148.854	0	0	0	1.2391	0	0	1.844	1.3798	0	-0.90717	0.62212	0	2.9257	1.2675	0	1.5346	1.9593	-0.87829	1.5402	1.938	0.89424	-0.91406	1.5713	-0.65359	-1.9024	0.14559	-0.21738	-1.1057	1.1183	0.99106
993	-180	-140	-180	1.1	263.149	141.038	141.207	201.057	0	0	0	1.3659	0	0	2.2258	1.1354	0	-0.13121	1.0921	0	3.2405	0.74314	0	2.0972	1.7992	-0.87516	2.063	1.7871	0.87957	0.46008	1.8383	-0.5673	-1.1931	1.427	-0.23389	-0.085994	1.5922	1.0201
994	-180	-140	-180	2.5	180	58.4627	89.1069	99.4608	0	0	0	1.1707	0	0	1.993	1.2828	0	-2.5	0	0	3.0437	1.0064	0	1.7433	1.8544	-0.89403	1.7432	1.8542	0.8941	-2.5755	0.82556	-0.69272	-2.3875	-1.0071	-0.36942	-2.4669	0.19025	1.0625
995	-180	-140	-180	2.5	90	51.795	59.2473	111.011	0	0	0	1.1817	0	0	1.8978	1.3402	0	0	-2.5	0	2.9672	1.1448	0	1.6109	1.8957	-0.89347	1.6109	1.8988	0.89162	-0.77971	-2.8688	-0.65425	1.0011	-2.3956	-0.3869	-0.13409	-2.6024	1.0684
996	-180	-140	-180	2.5	270	60.4276	66.9406	105.646	0	0	0	1.1746	0	0	2.2774	0.95067	0	0	2.5	0	3.2043	0.37988	0	2.2218	1.5586	-0.9023	2.216	1.5836	0.88516	0.73786	2.9938	-0.61913	-1.0245	2.5575	-0.34511	0.13151	2.5913	1.0726
997	-180	-140	-180	2.5	116.36	49.1651	56.0561	108.035	0	0	0	1.1764	0	0	1.9114	1.3262	0	-1.11	-2.24	0	2.9778	1.1166	0	1.6297	1.8853	-0.89278	1.6297	1.8856	0.89261	-1.8796	-1.9322	-0.69327	-0.28043	-2.8321	-0.36093	-1.3311	-2.2378	1.0581
998	-180	-140	-180	2.5	243.64	46.4747	50.1341	107.074	0	0	0	1.1746	0	0	2.0185	1.2319	0	-1.11	2.24	0	3.0656	0.93882	0	1.7788	1.8093	-0.89352	1.7759	1.8133	0.89033	-0.5609	2.9012	-0.6592	-2.0104	1.7827	-0.38465	-1.0706	2.4446	1.0626
999	-180	-140	-180	2.5	96.8508	49.8787	56.6202	109.556	0	0	0	1.1803	0	0	1.9011	1.3358	0	-0.29821	-2.4822	0	2.9698	1.1368	0	1.6157	1.8927	-0.89308	1.6156	1.8945	0.89198	-1.1267	-2.6604	-0.67237	0.71078	-2.5526	-0.3777	-0.46388	-2.5869	1.0635
1000	-180	-140	-180	2.5	145.558	54.4061	68.0976	107.188	0	0	0	1.1721	0	0	1.9425	1.3083	0	-2.0618	-1.4139	0	3.0032	1.0723	0	1.6723	1.8711	-0.8938	1.6722	1.8726	0.89286	-2.4031	-0.65508	-0.68712	-1.9143	-2.4265	-0.35117	-2.1263	-1.2262	1.0618
1001	-180	-140	-180	2.5	214.442	51.5213	60.3246	107.393	0	0	0	1.1735	0	0	1.9899	1.2771	0	-2.0618	1.4139	0	3.0428	1.0076	0	1.7369	1.8502	-0.89254	1.7373	1.8486	0.8936	-1.9852	2.2846	-0.63886	-2.4717	0.50317	-0.40814	-2.0761	1.5528	1.0724
1002	-180	-140	-180	2.5	263.149	53.6296	58.2112	106.204	0	0	0	1.1748	0	0	2.1863	1.0586	0	-0.29821	2.4822	0	3.1683	0.58981	0	2.0602	1.6593	-0.90033	2.0516	1.6799	0.88569	0.40506	3.0021	-0.63795	-1.3173	2.4189	-0.35808	-0.18276	2.6286	1.0682
1003	-180	-140	-180	1.30503	180	52.3426	52.3776	87.8297	0	0	0	1.2217	0	0	1.8406	1.3902	0	-1.305	0	0	2.9252	1.2812	0	1.5176	1.9414	-0.88832	1.5192	1.9329	0.89391	-1.7728	0.77385	-0.64933	-1.8121	-0.96674	-0.24419	-1.6536	0.26317	1.0121
1004	-180	-140	-180	1.30503	90	44.8054	44.876	123.623	0	0	0	1.3029	0	0	1.8764	1.3726	0	0	-1.305	0	2.9631	1.2906	0	1.5544	1.9202	-0.89068	1.5532	1.9309	0.88416	-0.80083	-1.6943	-0.67198	0.8946	-1.8692	-0.23339	-0.37987	-1.689	0.97073
1005	-180	-140	-180	1.30503	270	78.3351	78.4447	128.649	0	0	0	1.3335	0	0	2.3557	1.009	0	0	1.305	0	3.303	0.47305	0	2.3321	1.6572	-0.89056	2.2912	1.6788	0.87185	0.69219	1.9061	-0.58082	-1.0029	1.7249	-0.27031	0.092959	1.7136	1.0271
1006	-180	-140	-180	1.30503	116.36	8.50362	8.57326	83.8403	0	0	0	1.2415	0	0	1.807	1.3582	0	-0.57945	-1.1693	0	2.8937	1.2828	0	1.4771	1.9012	-0.88995	1.4752	1.9112	0.88351	-1.4571	-1.17	-0.65962	0.077966	-2.0207	-0.23956	-1.0182	-1.3589	0.99413
1007	-180	-140	-180	1.30503	243.64	20.1021	20.1671	97.3292	0	0	0	1.2566	0	0	2.0218	1.2617	0	-0.57945	1.1693	0	3.073	0.98314	0	1.8283	1.8757	-0.88843	1.805	1.8773	0.88173	-0.12311	1.9443	-0.63185	-1.6357	1.0953	-0.2833	-0.59247	1.607	1.015
1008	-180	-140	-180	1.30503	96.8508	26.6029	26.6709	110.24	0	0	0	1.2796	0	0	1.8536	1.3637	0	-0.15567	-1.2957	0	2.94	1.2814	0	1.5319	1.9106	-0.8911	1.5303	1.9239	0.88277	-0.98899	-1.5969	-0.6641	0.70943	-1.911	-0.23243	-0.54687	-1.6313	0.98069
1009	-180	-140	-180	1.30503	145.558	28.3495	28.3918	79.2647	0	0	0	1.2252	0	0	1.7831	1.3705	0	-1.0763	-0.73808	0	2.8708	1.3011	0	1.4416	1.9046	-0.89061	1.4389	1.9128	0.88503	-1.836	-0.30255	-0.66191	-0.9885	-1.8312	-0.22611	-1.5317	-0.66604	0.99927
1010	-180	-140	-180	1.30503	214.442	30.3293	30.3749	85.7642	0	0	0	1.2274	0	0	1.8853	1.3708	0	-1.0763	0.73808	0	2.9636	1.2238	0	1.5961	1.9508	-0.88272	1.5966	1.9304	0.89592	-1.0626	1.6524	-0.6392	-1.9603	0.15788	-0.29232	-1.2816	1.1081	1.0196
1011	-180	-140	-180	1.30503	263.149	53.7855	53.889	117.152	0	0	0	1.3058	0	0	2.2548	1.0934	0	-0.15567	1.2957	0	3.2372	0.6254	0	2.1901	1.7349	-0.89143	2.1486	1.7529	0.8734	0.48995	1.9299	-0.60134	-1.1894	1.5951	-0.27118	-0.073188	1.7137	1.0221
1012	-180	-140	-180	2.29497	180	64.4624	89.4506	105.645	0	0	0	1.1725	0	0	2.0011	1.2799	0	-2.295	0	0	3.0507	0.99896	0	1.7543	1.8534	-0.89365	1.7542	1.852	0.89453	-2.5409	0.80655	-0.67678	-2.2248	-1.0089	-0.37394	-2.3131	0.17355	1.0659
1013	-180	-140	-180	2.29497	90	49.6917	51.0924	114.373	0	0	0	1.1951	0	0	1.8418	1.3704	0	0	-2.295	0	2.92	1.2272	0	1.5327	1.9161	-0.89274	1.5325	1.9204	0.89011	-0.77928	-2.6702	-0.65389	1.0094	-2.275	-0.37995	-0.12839	-2.4643	1.0619
1014	-180	-140	-180	2.29497	270	62.3192	64.0496	110.051	0	0	0	1.1813	0	0	2.3276	0.88661	0	0	2.295	0	3.2179	0.26037	0	2.3261	1.49	-0.9077	2.3092	1.5306	0.87961	0.77927	2.6581	-0.65388	-1.0051	2.5707	-0.30041	0.18772	2.4334	1.0604
1015	-180	-140	-180	2.29497	116.36	45.6343	46.9512	109.67	0	0	0	1.1841	0	0	1.8557	1.3522	0	-1.019	-2.0563	0	2.9308	1.1901	0	1.5522	1.9018	-0.89185	1.5521	1.9024	0.89148	-1.8103	-1.7987	-0.69089	-0.22752	-2.7049	-0.35323	-1.2723	-2.1002	1.0512
1016	-180	-140	-180	2.29497	243.64	42.1103	42.2765	107.76	0	0	0	1.1808	0	0	2.0275	1.2152	0	-1.019	2.0563	0	3.074	0.91872	0	1.7947	1.7953	-0.89422	1.789	1.8013	0.88914	-0.48136	2.7319	-0.65593	-1.9594	1.6774	-0.37743	-1.0049	2.3091	1.0544
1017	-180	-140	-180	2.29497	96.8508	46.4427	47.5189	111.677	0	0	0	1.1918	0	0	1.8458	1.364	0	-0.27376	-2.2786	0	2.9231	1.215	0	1.5386	1.9114	-0.89224	1.5384	1.914	0.89061	-1.1007	-2.4862	-0.66812	0.72932	-2.43	-0.37213	-0.44279	-2.4406	1.0571
1018	-180	-140	-180	2.29497	145.558	55.8691	62.7799	112.202	0	0	0	1.1763	0	0	1.8995	1.3296	0	-1.8927	-1.298	0	2.968	1.1301	0	1.6114	1.8842	-0.89347	1.6109	1.8869	0.89176	-2.2876	-0.56911	-0.6918	-1.7892	-2.3246	-0.32996	-2.0296	-1.1131	1.0565
1019	-180	-140	-180	2.29497	214.442	51.2282	54.4584	110.744	0	0	0	1.1783	0	0	1.9918	1.2748	0	-1.8927	1.298	0	3.046	1.0089	0	1.7393	1.8501	-0.89173	1.7397	1.8471	0.89368	-1.8463	2.1782	-0.63112	-2.3642	0.41639	-0.40722	-1.9664	1.4507	1.0693
1020	-180	-140	-180	2.29497	263.149	52.6756	53.342	108.801	0	0	0	1.1819	0	0	2.2236	1.0131	0	-0.27376	2.2786	0	3.1857	0.50478	0	2.1356	1.6145	-0.90493	2.1176	1.6464	0.88168	0.45643	2.7359	-0.6541	-1.3016	2.3695	-0.33145	-0.13248	2.483	1.0571
1021	-180	-140	-180	1.15328	180	86.287	86.3518	120.389	0	0	0	1.2236	0	0	1.8312	1.3848	0	-1.1533	0	0	2.9155	1.2795	0	1.5106	1.9409	-0.88674	1.5133	1.9301	0.89437	-1.6838	0.77426	-0.64968	-1.7484	-0.96585	-0.19783	-1.5566	0.31816	0.99152
1022	-180	-140	-180	1.15328	90	101.45	101.536	181.626	0	0	0	1.3464	0	0	1.9199	1.3699	0	0	-1.1533	0	3.0065	1.2802	0	1.6064	1.9238	-0.89069	1.6047	1.9347	0.88381	-0.81173	-1.5671	-0.68112	0.85041	-1.8203	-0.14697	-0.52016	-1.5619	0.92256
1023	-180	-140	-180	1.15328	270	134.135	134.263	181.287	0	0	0	1.3856	0	0	2.335	1.0552	0	0	1.1533	0	3.3144	0.581	0	2.2582	1.722	-0.87856	2.2209	1.7206	0.87682	0.65253	1.8503	-0.54754	-1.0288	1.5865	-0.25556	0.04255	1.6237	1.0282
1024	-180	-140	-180	1.15328	116.36	53.4601	53.557	128.057	0	0	0	1.2561	0	0	1.8278	1.3518	0	-0.51208	-1.0334	0	2.9141	1.2692	0	1.5054	1.9006	-0.8901	1.5037	1.9125	0.88257	-1.4088	-1.0892	-0.6534	0.11692	-1.9331	-0.18716	-1.0277	-1.2339	0.97021
1025	-180	-140	-180	1.15328	243.64	66.8226	66.9145	141.811	0	0	0	1.2762	0	0	2.0078	1.27	0	-0.51208	1.0334	0	3.0646	1.0148	0	1.797	1.8927	-0.88178	1.7763	1.8848	0.88214	-0.086611	1.8505	-0.62433	-1.593	1.02	-0.24436	-0.52235	1.5266	1.0056
1026	-180	-140	-180	1.53212	180	54.1064	54.0806	89.9393	0	0	0	1.2239	0	0	1.8509	1.3961	0	-1.5321	0	0	2.9362	1.2852	0	1.5261	1.943	-0.88987	1.5266	1.9375	0.89315	-1.9126	0.78493	-0.65863	-1.9182	-0.97969	-0.29607	-1.8146	0.22027	1.0293
1027	-180	-140	-180	1.53212	90	21.4172	21.4309	98.4828	0	0	0	1.2689	0	0	1.8328	1.3791	0	0	-1.5321	0	2.9199	1.3075	0	1.5026	1.9209	-0.89069	1.5017	1.9303	0.88502	-0.79464	-1.8965	-0.66679	0.94862	-1.9463	-0.30353	-0.26137	-1.8705	1.0082
1028	-180	-140	-180	1.53212	270	54.5225	54.5624	107.235	0	0	0	1.2895	0	0	2.3726	0.96716	0	0	1.5321	0	3.287	0.37616	0	2.3964	1.5958	-0.90045	2.3554	1.6357	0.86974	0.73891	2.007	-0.62002	-0.98593	1.9386	-0.27658	0.15388	1.8602	1.0322
1029	-180	-140	-180	1.53212	116.36	0.24541	0.243061	74.9367	0	0	0	1.2286	0	0	1.7846	1.369	0	-0.68029	-1.3728	0	2.8717	1.3005	0	1.4475	1.9069	-0.8895	1.446	1.913	0.88541	-1.5356	-1.2991	-0.67056	0.011382	-2.167	-0.29082	-1.05	-1.5363	1.015
1030	-180	-140	-180	1.53212	243.64	8.18361	8.18387	86.4258	0	0	0	1.2372	0	0	2.0304	1.247	0	-0.68029	1.3728	0	3.0788	0.95644	0	1.8408	1.8501	-0.89394	1.8189	1.8598	0.88234	-0.1872	2.1022	-0.64248	-1.7092	1.2196	-0.31939	-0.68569	1.7524	1.0265
1031	-180	-140	-180	2.06788	180	75.0212	88.4247	117.471	0	0	0	1.1796	0	0	2.0122	1.2832	0	-2.0679	0	0	3.0619	1.0011	0	1.768	1.8639	-0.89025	1.7673	1.8517	0.89762	-2.707	0.67551	-0.56682	-1.9808	-1.0026	-0.3904	-2.0876	0.10121	1.0777
1032	-180	-140	-180	2.06788	90	40.7354	40.6414	110.744	0	0	0	1.2169	0	0	1.7975	1.3907	0	0	-2.0679	0	2.8821	1.2988	0	1.469	1.9284	-0.89175	1.4684	1.9342	0.88814	-0.7831	-2.4364	-0.6571	1.011	-2.1576	-0.36568	-0.14385	-2.2931	1.0513
1033	-180	-140	-180	2.06788	270	60.6832	60.6176	112.335	0	0	0	1.2013	0	0	2.3669	0.86183	0	0	2.0679	0	3.234	0.20338	0	2.4114	1.4648	-0.90889	2.3844	1.513	0.87545	0.79496	2.3525	-0.66705	-0.96313	2.4892	-0.27849	0.22435	2.2467	1.0478
1034	-180	-140	-180	2.06788	116.36	34.7168	34.615	103.964	0	0	0	1.1975	0	0	1.7952	1.3755	0	-0.91817	-1.8529	0	2.878	1.2691	0	1.4679	1.9144	-0.89059	1.4675	1.9157	0.88975	-1.7286	-1.6438	-0.68722	-0.16197	-2.5507	-0.342	-1.2032	-1.9369	1.0422
1035	-180	-140	-180	2.06788	243.64	32.5564	32.4656	104.018	0	0	0	1.1937	0	0	2.0314	1.2134	0	-0.91817	1.8529	0	3.078	0.91664	0	1.8124	1.7984	-0.89536	1.8023	1.8073	0.8874	-0.38714	2.5368	-0.65405	-1.8888	1.5413	-0.36544	-0.91186	2.1401	1.0474
1036	-180	-140	-180	2.44672	180	59.7124	89.4003	100.664	0	0	0	1.171	0	0	1.9945	1.2821	0	-2.4467	0	0	3.045	1.0048	0	1.7454	1.854	-0.89401	1.7453	1.8537	0.89414	-2.5377	0.8246	-0.69193	-2.3478	-1.0082	-0.36966	-2.4238	0.18871	1.063
1037	-180	-140	-180	2.44672	90	51.5548	57.26	112.154	0	0	0	1.1844	0	0	1.8849	1.3474	0	0	-2.4467	0	2.9564	1.1638	0	1.5929	1.9007	-0.89332	1.5928	1.9041	0.89128	-0.77966	-2.8168	-0.65422	1.0038	-2.3649	-0.38554	-0.13198	-2.5666	1.0672
1038	-180	-140	-180	2.44672	270	61.0339	66.2237	106.805	0	0	0	1.1757	0	0	2.2901	0.93357	0	0	2.4467	0	3.2081	0.34855	0	2.2475	1.5406	-0.90374	2.2391	1.5695	0.88382	0.74931	2.9093	-0.62874	-1.0248	2.56	-0.33179	0.14571	2.5503	1.07
1039	-180	-140	-180	2.44672	116.36	48.5838	53.8646	108.745	0	0	0	1.178	0	0	1.8994	1.332	0	-1.0864	-2.1923	0	2.9679	1.1326	0	1.6131	1.8892	-0.89258	1.6131	1.8895	0.89237	-1.8618	-1.8977	-0.69278	-0.26634	-2.799	-0.35924	-1.3156	-2.2022	1.0566
1040	-180	-140	-180	2.44672	243.64	45.6707	48.1809	107.493	0	0	0	1.1758	0	0	2.0212	1.2273	0	-1.0864	2.1923	0	3.068	0.93267	0	1.7834	1.8054	-0.89367	1.7799	1.8099	0.89006	-0.53955	2.8565	-0.65858	-1.9982	1.7558	-0.38276	-1.0534	2.4091	1.0608
1041	-180	-100	-180	1.8	180	78.0584	77.9709	113.544	0	0	0	1.226	0	0	1.885	1.3967	0	-1.8	0	0	2.9687	1.2657	0	1.5704	1.9415	-0.89453	1.5696	1.9494	0.8897	-2.005	0.18467	-1.0473	-2.0109	-1.0027	0.34284	-2.1236	0.79858	0.65867
1042	-180	-100	-180	1.8	90	27.3489	27.3019	101.601	0	0	0	1.2422	0	0	1.8012	1.3882	0	0	-1.8	0	2.8881	1.3175	0	1.467	1.9338	-0.88632	1.4679	1.926	0.89105	-0.18294	-2.0718	-1.0375	0.9838	-2.0553	0.35905	-0.81347	-2.1511	0.63697
1043	-180	-100	-180	1.8	270	55.312	55.2975	109.662	0	0	0	1.244	0	0	2.3645	0.93041	0	0	1.8	0	3.258	0.30827	0	2.3685	1.5927	-0.87023	2.4035	1.544	0.90533	0.18263	2.068	-1.0358	-0.99766	2.1736	0.25092	0.69554	2.1465	0.74122
1044	-180	-100	-180	1.8	116.36	16.72	16.655	89.5888	0	0	0	1.214	0	0	1.7754	1.3779	0	-0.79923	-1.6128	0	2.8615	1.3019	0	1.4373	1.9169	-0.8876	1.4381	1.9137	0.88968	-1.0772	-1.7607	-1.04	-0.08271	-2.3452	0.36401	-1.6519	-1.454	0.65172
1045	-180	-100	-180	1.8	243.64	19.17	19.1125	95.8898	0	0	0	1.2148	0	0	2.0295	1.2289	0	-0.79923	1.6128	0	3.0778	0.93745	0	1.8105	1.8327	-0.88473	1.826	1.8216	0.89554	-0.77016	1.9633	-1.0302	-1.8094	1.3645	0.30769	-0.30938	2.2921	0.69195
1046	-180	-100	-180	1.8	96.8508	19.4292	19.3754	95.7109	0	0	0	1.2312	0	0	1.7955	1.381	0	-0.21471	-1.7871	0	2.8818	1.3048	0	1.4626	1.9263	-0.88655	1.4636	1.9199	0.89057	-0.42896	-2.0386	-1.0363	0.74213	-2.1515	0.34848	-1.0525	-2.0201	0.65464
1047	-180	-100	-180	1.8	145.558	42.619	42.5516	100.013	0	0	0	1.2087	0	0	1.7538	1.3895	0	-1.4845	-1.018	0	2.8414	1.3251	0	1.4	1.9197	-0.88641	1.4034	1.9119	0.89195	-1.7396	-0.96781	-1.0533	-1.3817	-2.0386	0.36941	-2.0667	-0.36115	0.6305
1048	-180	-100	-180	1.8	214.442	37.072	36.9973	99.932	0	0	0	1.2073	0	0	1.9577	1.3155	0	-1.4845	1.018	0	3.0255	1.1039	0	1.6926	1.8848	-0.89441	1.6927	1.8941	0.88867	-1.6067	1.3234	-1.0362	-2.1518	0.22647	0.30779	-1.4534	1.8685	0.68049
1049	-180	-100	-180	1.8	263.149	38.6577	38.6395	102.993	0	0	0	1.2331	0	0	2.2627	1.032	0	-0.21471	1.7871	0	3.2148	0.50454	0	2.1954	1.6865	-0.87296	2.2303	1.6446	0.9051	-0.06765	2.0906	-1.0334	-1.2488	1.9983	0.27462	0.45581	2.2267	0.72005
1050	-180	-100	-180	1.1	180	111.971	112.049	145.933	0	0	0	1.2254	0	0	1.8284	1.382	0	-1.1	0	0	2.9124	1.2767	0	1.5135	1.9299	-0.89423	1.51	1.9402	0.88642	-1.5048	0.18121	-1.0277	-1.717	-0.94264	0.2948	-1.6854	0.86399	0.51945
1051	-180	-100	-180	1.1	90	138.343	138.453	214.066	0	0	0	1.3626	0	0	1.9411	1.3632	0	0	-1.1	0	3.0273	1.2674	0	1.6287	1.9399	-0.87809	1.6332	1.9131	0.89522	-0.18123	-1.5511	-1.0278	0.76736	-1.7798	0.39604	-0.96567	-1.5378	0.43338
1052	-180	-100	-180	1.1	270	165.09	165.204	211.18	0	0	0	1.4149	0	0	2.285	1.1067	0	0	1.1	0	3.2983	0.71182	0	2.1076	1.7789	-0.86648	2.1361	1.7741	0.87392	0.17019	1.668	-0.96519	-1.0818	1.5163	0.11322	0.45926	1.758	0.78248
1053	-180	-100	-180	1.1	116.36	85.6274	85.7497	156.948	0	0	0	1.2632	0	0	1.8372	1.3492	0	-0.48842	-0.98562	0	2.9234	1.2633	0	1.5162	1.9168	-0.8799	1.5183	1.8969	0.89236	-0.84184	-1.2938	-1.0198	0.11782	-1.8817	0.30145	-1.4574	-1.0521	0.54604
1054	-180	-100	-180	1.1	243.64	98.5174	98.6374	172.213	0	0	0	1.2858	0	0	2.0015	1.274	0	-0.48842	0.98562	0	3.061	1.0304	0	1.7618	1.8875	-0.88217	1.7822	1.899	0.87925	-0.53747	1.4851	-1.0085	-1.5778	0.98686	0.24688	-0.081566	1.8215	0.62326
1055	-180	-100	-180	1.1	96.8508	115.649	115.803	197.207	0	0	0	1.3241	0	0	1.9023	1.3574	0	-0.13121	-1.0921	0	2.9884	1.2644	0	1.5887	1.9347	-0.87697	1.592	1.9051	0.8956	-0.36379	-1.5111	-1.0261	0.63138	-1.8067	0.34968	-1.0929	-1.4416	0.47849
1056	-180	-100	-180	1.1	145.558	94.5635	94.663	140.357	0	0	0	1.233	0	0	1.8045	1.358	0	-0.90717	-0.62212	0	2.891	1.275	0	1.475	1.9115	-0.88511	1.4759	1.9033	0.89005	-1.3491	-0.70657	-1.0226	-0.84342	-1.7457	0.28971	-1.8064	-0.23475	0.55187
1057	-180	-100	-180	1.1	214.442	97.6211	97.7199	149.34	0	0	0	1.2387	0	0	1.8509	1.3779	0	-0.90717	0.62212	0	2.9314	1.2548	0	1.5548	1.9371	-0.89573	1.5477	1.9613	0.87734	-1.1567	1.0119	-1.023	-1.8854	0.16561	0.30942	-0.88513	1.6444	0.54189
1058	-180	-100	-180	1.1	263.149	139.418	139.581	200.475	0	0	0	1.3644	0	0	2.1992	1.1524	0	-0.13121	1.0921	0	3.2243	0.78964	0	2.0113	1.8099	-0.87039	2.0442	1.808	0.87751	-0.022832	1.6408	-0.98141	-1.2206	1.4026	0.15309	0.33926	1.7855	0.73492
1059	-180	-100	-180	2.5	180	58.4625	89.1046	99.4606	0	0	0	1.1707	0	0	1.993	1.2828	0	-2.5	0	0	3.0437	1.0064	0	1.7432	1.8542	-0.8941	1.7433	1.8544	0.89403	-2.466	0.18743	-1.063	-2.3875	-1.0059	0.37251	-2.576	0.82788	0.68991
1060	-180	-100	-180	2.5	90	51.8204	59.3115	110.99	0	0	0	1.1818	0	0	1.8972	1.3407	0	0	-2.5	0	2.9667	1.1459	0	1.6101	1.8991	-0.89166	1.6101	1.8961	0.89343	-0.18689	-2.6091	-1.0599	1.0179	-2.4001	0.34127	-0.75618	-2.8532	0.68952
1061	-180	-100	-180	2.5	270	60.3299	66.7283	105.732	0	0	0	1.1747	0	0	2.2764	0.95184	0	0	2.5	0	3.2042	0.38247	0	2.2136	1.5848	-0.88502	2.2204	1.5603	0.90184	0.1865	2.6497	-1.0577	-1.0439	2.5337	0.28594	0.68748	2.9651	0.69497
1062	-180	-100	-180	2.5	116.36	49.1658	56.0573	108.036	0	0	0	1.1764	0	0	1.9114	1.3262	0	-1.11	-2.24	0	2.9778	1.1166	0	1.6297	1.8856	-0.89261	1.6297	1.8853	0.89278	-1.3206	-2.2438	-1.0602	-0.28368	-2.8297	0.37212	-1.8861	-1.9287	0.6844
1063	-180	-100	-180	2.5	243.64	46.4678	50.1227	107.114	0	0	0	1.1746	0	0	2.018	1.2324	0	-1.11	2.24	0	3.0653	0.93978	0	1.7752	1.8135	-0.89043	1.7779	1.8098	0.89334	-1.0244	2.4848	-1.0514	-2.0266	1.7704	0.32724	-0.59066	2.8742	0.70807
1064	-180	-100	-180	2.5	96.8508	49.8809	56.6219	109.558	0	0	0	1.1804	0	0	1.901	1.3359	0	-0.29821	-2.4822	0	2.9697	1.1369	0	1.6155	1.8945	-0.89201	1.6156	1.8928	0.89305	-0.49884	-2.5891	-1.0573	0.72226	-2.5527	0.34535	-1.1051	-2.6575	0.69884
1065	-180	-100	-180	2.5	145.558	54.4065	68.1063	107.165	0	0	0	1.1721	0	0	1.9426	1.3083	0	-2.0618	-1.4139	0	3.0033	1.0722	0	1.6723	1.8726	-0.89285	1.6724	1.871	0.89381	-2.121	-1.2274	-1.0623	-1.9157	-2.4265	0.35188	-2.4009	-0.65477	0.68774
1066	-180	-100	-180	2.5	214.442	51.5552	60.4083	107.335	0	0	0	1.1736	0	0	1.9902	1.2771	0	-2.0618	1.4139	0	3.0431	1.0074	0	1.7379	1.8487	-0.89364	1.7375	1.8503	0.89256	-2.0465	1.63	-1.0596	-2.4899	0.48218	0.33498	-1.9814	2.237	0.6985
1067	-180	-100	-180	2.5	263.149	53.5519	58.0809	106.265	0	0	0	1.1749	0	0	2.1847	1.0602	0	-0.29821	2.4822	0	3.1676	0.59345	0	2.0485	1.681	-0.88576	2.0573	1.6614	0.89977	-0.13416	2.6751	-1.0543	-1.3346	2.3981	0.30021	0.35944	2.9787	0.70231
1068	-180	-100	-180	1.30503	180	52.2654	52.3003	88.0292	0	0	0	1.2217	0	0	1.8413	1.3901	0	-1.305	0	0	2.9258	1.28	0	1.5206	1.933	-0.89393	1.5191	1.9414	0.88842	-1.6426	0.18216	-1.0331	-1.8076	-0.94831	0.31041	-1.787	0.82304	0.57782
1069	-180	-100	-180	1.30503	90	44.7668	44.8436	122.431	0	0	0	1.2998	0	0	1.8776	1.3687	0	0	-1.305	0	2.9641	1.284	0	1.555	1.93	-0.88268	1.5569	1.9152	0.89172	-0.17982	-1.6973	-1.0198	0.83576	-1.8597	0.41087	-0.90821	-1.6986	0.51568
1070	-180	-100	-180	1.30503	270	75.7533	75.8538	127.658	0	0	0	1.3315	0	0	2.3267	1.0396	0	0	1.305	0	3.2884	0.53018	0	2.2443	1.7123	-0.86722	2.2768	1.6858	0.88972	0.17409	1.7635	-0.98732	-1.045	1.6959	0.15803	0.52537	1.855	0.78215
1071	-180	-100	-180	1.30503	116.36	8.85697	8.92505	83.1559	0	0	0	1.2412	0	0	1.8069	1.358	0	-0.57945	-1.1693	0	2.8936	1.2825	0	1.4748	1.9121	-0.88272	1.477	1.8998	0.89069	-0.906	-1.4224	-1.0222	0.065937	-2.0018	0.32791	-1.4972	-1.1603	0.59952
1072	-180	-100	-180	1.30503	243.64	20.0701	20.1367	97.2741	0	0	0	1.2565	0	0	2.0193	1.2632	0	-0.57945	1.1693	0	3.0713	0.9876	0	1.8002	1.8786	-0.88129	1.8238	1.8764	0.88848	-0.59868	1.6103	-1.0128	-1.638	1.0863	0.27543	-0.14116	1.9358	0.65454
1073	-180	-100	-180	1.30503	96.8508	26.8917	26.9647	109.122	0	0	0	1.2782	0	0	1.8538	1.3622	0	-0.15567	-1.2957	0	2.9402	1.2789	0	1.5304	1.9249	-0.88123	1.5327	1.907	0.89243	-0.38041	-1.6572	-1.0209	0.67175	-1.8993	0.36602	-1.0646	-1.5952	0.55483
1074	-180	-100	-180	1.30503	145.558	28.686	28.728	78.7249	0	0	0	1.225	0	0	1.7837	1.3704	0	-1.0763	-0.73808	0	2.8714	1.3005	0	1.4393	1.9136	-0.88442	1.4425	1.9035	0.89127	-1.4589	-0.78009	-1.0309	-0.98541	-1.8091	0.31733	-1.8725	-0.27259	0.59349
1075	-180	-100	-180	1.30503	214.442	30.2281	30.2713	86.0781	0	0	0	1.2274	0	0	1.8855	1.3706	0	-1.0763	0.73808	0	2.9636	1.2226	0	1.598	1.9304	-0.89618	1.5969	1.9511	0.88257	-1.278	1.0956	-1.0252	-1.9603	0.17225	0.31497	-1.0444	1.6817	0.59665
1076	-180	-100	-180	1.30503	263.149	52.5546	52.6465	116.867	0	0	0	1.3049	0	0	2.2348	1.1113	0	-0.15567	1.2957	0	3.2262	0.66284	0	2.1149	1.7722	-0.87004	2.1519	1.7503	0.89094	-0.033388	1.7515	-0.99688	-1.2184	1.5662	0.19612	0.37607	1.8927	0.74087
1077	-180	-100	-180	2.29497	180	64.4655	89.6748	105.509	0	0	0	1.1724	0	0	2.001	1.2799	0	-2.295	0	0	3.0506	0.99895	0	1.7541	1.852	-0.8945	1.7542	1.8533	0.8937	-2.3125	0.18753	-1.0636	-2.2296	-1.013	0.36338	-2.5216	0.80454	0.68565
1078	-180	-100	-180	2.29497	90	49.7334	51.1474	114.368	0	0	0	1.1953	0	0	1.8412	1.371	0	0	-2.295	0	2.9195	1.2284	0	1.5316	1.9207	-0.89017	1.5318	1.9166	0.89268	-0.18557	-2.4714	-1.0524	1.0259	-2.2794	0.33236	-0.75513	-2.6564	0.68907
1079	-180	-100	-180	2.29497	270	62.1918	63.9533	110.154	0	0	0	1.1816	0	0	2.3202	0.8954	0	0	2.295	0	3.2167	0.27815	0	2.2937	1.54	-0.87903	2.3117	1.499	0.90737	0.18581	2.4767	-1.0538	-1.0227	2.5213	0.28495	0.73235	2.6632	0.70379
1080	-180	-100	-180	2.29497	116.36	45.6367	46.9543	109.672	0	0	0	1.1841	0	0	1.8557	1.3522	0	-1.019	-2.0563	0	2.9308	1.1901	0	1.5521	1.9024	-0.89147	1.5522	1.9018	0.89185	-1.2537	-2.111	-1.0549	-0.23306	-2.7007	0.37275	-1.8215	-1.7928	0.67551
1081	-180	-100	-180	2.29497	243.64	42.0896	42.2528	107.786	0	0	0	1.1808	0	0	2.0264	1.2161	0	-1.019	2.0563	0	3.0732	0.9209	0	1.7874	1.8017	-0.88927	1.7925	1.7963	0.89392	-0.95829	2.3479	-1.0427	-1.9754	1.664	0.31927	-0.51482	2.706	0.7068
1082	-180	-100	-180	2.29497	96.8508	46.4478	47.5234	111.706	0	0	0	1.1918	0	0	1.8456	1.3641	0	-0.27376	-2.2786	0	2.9229	1.2153	0	1.5381	1.9141	-0.89065	1.5384	1.9116	0.8922	-0.47988	-2.4415	-1.0505	0.74099	-2.4309	0.3385	-1.0786	-2.4839	0.69525
1083	-180	-100	-180	2.29497	145.558	55.8916	62.8324	112.133	0	0	0	1.1764	0	0	1.8995	1.3296	0	-1.8927	-1.298	0	2.968	1.1302	0	1.6109	1.887	-0.89169	1.6114	1.8841	0.89354	-2.0104	-1.1511	-1.0647	-1.7876	-2.3125	0.36508	-2.2967	-0.54962	0.66484
1084	-180	-100	-180	2.29497	214.442	51.2985	54.5735	110.653	0	0	0	1.1784	0	0	1.9922	1.275	0	-1.8927	1.298	0	3.0463	1.009	0	1.7403	1.8475	-0.89369	1.7399	1.8504	0.8918	-1.9297	1.5485	-1.0528	-2.3852	0.39153	0.31689	-1.8448	2.1211	0.70353
1085	-180	-100	-180	2.29497	263.149	52.557	53.2182	108.89	0	0	0	1.1821	0	0	2.2183	1.0182	0	-0.27376	2.2786	0	3.1838	0.51631	0	2.1072	1.6508	-0.88152	2.1253	1.6197	0.90426	-0.11619	2.5157	-1.0476	-1.3146	2.3382	0.29806	0.41083	2.7305	0.70559
1086	-180	-100	-180	1.15328	180	86.1277	86.1928	120.783	0	0	0	1.2236	0	0	1.8326	1.3844	0	-1.1533	0	0	2.9167	1.277	0	1.5161	1.9305	-0.89437	1.5133	1.9408	0.88691	-1.5361	0.18172	-1.0306	-1.7392	-0.94239	0.29676	-1.7099	0.84784	0.53634
1087	-180	-100	-180	1.15328	90	102.642	102.739	179.243	0	0	0	1.3402	0	0	1.9206	1.3644	0	0	-1.1533	0	3.0067	1.2712	0	1.6052	1.9359	-0.8798	1.6088	1.9137	0.89378	-0.18045	-1.5877	-1.0234	0.78314	-1.8002	0.40517	-0.94823	-1.5773	0.4586
1088	-180	-100	-180	1.15328	270	130.956	131.067	179.192	0	0	0	1.3829	0	0	2.2978	1.0838	0	0	1.1533	0	3.2945	0.64808	0	2.1536	1.7571	-0.86663	2.1834	1.7447	0.87952	0.1712	1.6879	-0.97089	-1.0694	1.5635	0.12474	0.47362	1.7794	0.78451
1089	-180	-100	-180	1.15328	116.36	54.2308	54.3262	126.867	0	0	0	1.2556	0	0	1.828	1.3513	0	-0.51208	-1.0334	0	2.9143	1.2682	0	1.5037	1.9148	-0.88072	1.5059	1.8972	0.89184	-0.85744	-1.3253	-1.0199	0.10503	-1.9108	0.30911	-1.4648	-1.0793	0.56317
1090	-180	-100	-180	1.15328	243.64	66.8419	66.9346	141.83	0	0	0	1.2759	0	0	2.0074	1.2712	0	-0.51208	1.0334	0	3.0643	1.0159	0	1.7751	1.8857	-0.88175	1.7973	1.8929	0.88224	-0.55211	1.515	-1.0094	-1.5917	1.0117	0.25564	-0.09663	1.8483	0.63255
1091	-180	-100	-180	1.53212	180	54.081	54.0551	90.0061	0	0	0	1.2239	0	0	1.8513	1.396	0	-1.5321	0	0	2.9365	1.2847	0	1.5272	1.9375	-0.8932	1.5267	1.943	0.88987	-1.8101	0.183	-1.0378	-1.917	-0.9686	0.33073	-1.918	0.81112	0.6234
1092	-180	-100	-180	1.53212	90	21.2142	21.2284	98.1414	0	0	0	1.2684	0	0	1.8341	1.3776	0	0	-1.5321	0	2.9211	1.3048	0	1.5035	1.9299	-0.88459	1.5046	1.9192	0.89103	-0.18103	-1.8654	-1.0267	0.9156	-1.9497	0.38845	-0.85916	-1.8975	0.58217
1093	-180	-100	-180	1.53212	270	53.0305	53.0739	106.943	0	0	0	1.2894	0	0	2.3528	0.99309	0	0	1.5321	0	3.2788	0.42068	0	2.3231	1.6624	-0.8681	2.3585	1.6227	0.89866	0.17841	1.8963	-1.0118	-1.0217	1.9033	0.20487	0.6092	1.9831	0.76694
1094	-180	-100	-180	1.53212	116.36	0.36083	0.358207	74.6371	0	0	0	1.2285	0	0	1.7845	1.3689	0	-0.68029	-1.3728	0	2.8716	1.3005	0	1.4457	1.9133	-0.88519	1.4474	1.9064	0.88969	-0.98333	-1.5754	-1.0297	0.00077765	-2.1533	0.34878	-1.5633	-1.2894	0.63133
1095	-180	-100	-180	1.53212	243.64	8.12363	8.12501	86.3889	0	0	0	1.2372	0	0	2.0272	1.2489	0	-0.68029	1.3728	0	3.0767	0.96208	0	1.8134	1.8611	-0.88215	1.8346	1.8514	0.89365	-0.67462	1.7667	-1.0207	-1.7153	1.2085	0.29463	-0.21302	2.0884	0.67666
1096	-180	-100	-180	2.06788	180	75.1436	89.0413	116.741	0	0	0	1.1796	0	0	2.0125	1.2829	0	-2.0679	0	0	3.0621	1.0004	0	1.7678	1.8512	-0.89779	1.7686	1.8639	0.89015	-2.075	0.18797	-1.066	-2.0049	-1.0261	0.32703	-2.6789	0.67231	0.59961
1097	-180	-100	-180	2.06788	90	40.7731	40.6791	110.735	0	0	0	1.2171	0	0	1.7972	1.3911	0	0	-2.0679	0	2.8819	1.2996	0	1.4679	1.9344	-0.88819	1.4686	1.9287	0.89171	-0.18426	-2.2941	-1.045	1.0203	-2.1629	0.33659	-0.77226	-2.4287	0.67411
1098	-180	-100	-180	2.06788	270	60.5895	60.5322	112.334	0	0	0	1.2024	0	0	2.3573	0.87475	0	0	2.0679	0	3.2329	0.22787	0	2.3643	1.528	-0.87416	2.3929	1.4774	0.90918	0.18493	2.2766	-1.0488	-0.98389	2.4395	0.28205	0.74892	2.3623	0.7143
1099	-180	-100	-180	2.06788	116.36	34.7258	34.624	103.95	0	0	0	1.1975	0	0	1.7952	1.3755	0	-0.91817	-1.8529	0	2.878	1.269	0	1.4675	1.9157	-0.88973	1.4679	1.9144	0.8906	-1.1745	-1.9539	-1.0481	-0.16985	-2.5442	0.37137	-1.745	-1.6354	0.66461
1100	-180	-100	-180	2.06788	243.64	32.5177	32.4239	104.025	0	0	0	1.1938	0	0	2.0295	1.2148	0	-0.91817	1.8529	0	3.0768	0.92022	0	1.7994	1.808	-0.88754	1.8087	1.7998	0.89494	-0.87264	2.1727	-1.0369	-1.9024	1.5281	0.31457	-0.42	2.5143	0.70141
1101	-180	-100	-180	2.44672	180	59.7123	89.4038	100.664	0	0	0	1.171	0	0	1.9945	1.2821	0	-2.4467	0	0	3.045	1.0048	0	1.7453	1.8537	-0.89414	1.7454	1.854	0.89401	-2.4229	0.18747	-1.0632	-2.348	-1.0076	0.37137	-2.5377	0.8261	0.69015
1102	-180	-100	-180	2.44672	90	51.5846	57.3188	112.138	0	0	0	1.1845	0	0	1.884	1.3481	0	0	-2.4467	0	2.9557	1.1653	0	1.5916	1.9046	-0.89133	1.5917	1.9013	0.89327	-0.18659	-2.5745	-1.0582	1.0209	-2.3688	0.3382	-0.75539	-2.8016	0.69011
1103	-180	-100	-180	2.44672	270	60.9156	66.0419	106.849	0	0	0	1.1759	0	0	2.2877	0.9362	0	0	2.4467	0	3.2077	0.35429	0	2.2339	1.5722	-0.88357	2.2433	1.5435	0.90332	0.18633	2.6058	-1.0567	-1.042	2.5273	0.2857	0.69838	2.8909	0.69726
1104	-180	-100	-180	2.44672	116.36	48.5847	53.866	108.746	0	0	0	1.178	0	0	1.8994	1.332	0	-1.0864	-2.1923	0	2.9679	1.1326	0	1.6131	1.8895	-0.89237	1.6131	1.8892	0.89258	-1.3032	-2.2093	-1.0591	-0.27013	-2.7962	0.37234	-1.8694	-1.8937	0.68241
1105	-180	-100	-180	2.44672	243.64	45.6608	48.1666	107.529	0	0	0	1.1758	0	0	2.0206	1.2279	0	-1.0864	2.1923	0	3.0676	0.93391	0	1.779	1.8101	-0.89016	1.7823	1.806	0.89347	-1.0071	2.449	-1.0494	-2.0143	1.7433	0.32515	-0.57026	2.8298	0.70792
1106	-180	-20	-180	1.8	180	78.0218	77.9346	113.554	0	0	0	1.2259	0	0	1.8862	1.3964	0	-1.8	0	0	2.9698	1.2643	0	1.5713	1.9498	-0.88937	1.5724	1.9408	0.89489	-2.0062	-0.99672	-0.36278	-1.9993	0.1447	1.0548	-2.1344	0.81494	-0.63263
1107	-180	-20	-180	1.8	90	27.321	27.2744	101.642	0	0	0	1.242	0	0	1.8013	1.3879	0	0	-1.8	0	2.8882	1.317	0	1.4681	1.9254	-0.89131	1.4672	1.934	0.88605	0.98499	-2.0525	-0.35851	-0.15376	-2.0656	1.0441	-0.81998	-2.1609	-0.62204
1108	-180	-20	-180	1.8	270	55.7155	55.6994	109.72	0	0	0	1.2434	0	0	2.3731	0.91907	0	0	1.8	0	3.2603	0.2878	0	2.4191	1.5305	-0.90651	2.3849	1.5835	0.86877	-0.95877	2.1934	-0.34896	0.2163	2.0962	1.0203	0.72534	2.1072	-0.73125
1109	-180	-20	-180	1.8	116.36	16.7063	16.6415	89.6213	0	0	0	1.214	0	0	1.7754	1.3779	0	-0.79923	-1.6128	0	2.8615	1.302	0	1.4381	1.9139	-0.88957	1.4373	1.9167	0.8877	-0.080811	-2.3485	-0.35318	-1.0989	-1.7514	1.0351	-1.641	-1.4555	-0.66644
1110	-180	-20	-180	1.8	243.64	19.2358	19.1802	95.8634	0	0	0	1.2148	0	0	2.0324	1.2271	0	-0.79923	1.6128	0	3.0798	0.93221	0	1.8317	1.8196	-0.89627	1.815	1.832	0.8843	-1.7936	1.3755	-0.36266	-0.8059	1.9432	1.0369	-0.27957	2.306	-0.65563
1111	-180	-20	-180	1.8	96.8508	19.4236	19.3697	95.6822	0	0	0	1.2311	0	0	1.7955	1.381	0	-0.21471	-1.7871	0	2.8818	1.3048	0	1.4635	1.9199	-0.8906	1.4627	1.9264	0.88653	0.73857	-2.1505	-0.36027	-0.41061	-2.0391	1.0398	-1.0618	-2.0219	-0.64195
1112	-180	-20	-180	1.8	145.558	42.4991	42.4314	100.239	0	0	0	1.2086	0	0	1.7538	1.3894	0	-1.4845	-1.018	0	2.8413	1.3249	0	1.4032	1.9125	-0.89152	1.4003	1.9191	0.88684	-1.3844	-2.0519	-0.33094	-1.7798	-0.90383	1.0372	-2.0415	-0.38708	-0.67923
1113	-180	-20	-180	1.8	214.442	36.9113	36.8385	100.279	0	0	0	1.2072	0	0	1.9577	1.3146	0	-1.4845	1.018	0	3.0255	1.1027	0	1.6929	1.8941	-0.88809	1.6927	1.883	0.89498	-2.1398	0.24155	-0.36797	-1.6395	1.2301	1.0551	-1.4516	1.9189	-0.61176
1114	-180	-20	-180	1.8	263.149	38.92	38.9014	103.002	0	0	0	1.2328	0	0	2.27	1.0249	0	-0.21471	1.7871	0	3.2177	0.48945	0	2.244	1.636	-0.90638	2.2086	1.6819	0.87168	-1.2199	2.0163	-0.35331	-0.056498	2.111	1.0246	0.48812	2.2011	-0.70525
1115	-180	-20	-180	1.1	180	111.906	111.986	146.03	0	0	0	1.2253	0	0	1.8296	1.3817	0	-1.1	0	0	2.9135	1.2747	0	1.5122	1.9404	-0.88634	1.5158	1.9296	0.89442	-1.7078	-0.93346	-0.33975	-1.4962	0.088859	1.0421	-1.7008	0.8871	-0.46208
1116	-180	-20	-180	1.1	90	136.931	137.03	216.228	0	0	0	1.3664	0	0	1.9397	1.3673	0	0	-1.1	0	3.0262	1.2742	0	1.6309	1.9233	-0.89135	1.6264	1.9356	0.88282	0.7959	-1.7952	-0.28968	-0.45445	-1.5437	0.94766	-0.89253	-1.5106	-0.60659
1117	-180	-20	-180	1.1	270	168.321	168.438	211.966	0	0	0	1.4133	0	0	2.3115	1.0909	0	0	1.1	0	3.3113	0.66186	0	2.1951	1.7516	-0.88121	2.1588	1.7662	0.86544	-1.024	1.5143	-0.37271	0.037705	1.6549	0.98226	0.57193	1.7819	-0.67766
1118	-180	-20	-180	1.1	116.36	85.4903	85.6128	157.065	0	0	0	1.2633	0	0	1.8364	1.3497	0	-0.48842	-0.98562	0	2.9227	1.2648	0	1.5177	1.8982	-0.89185	1.5138	1.9155	0.88041	0.095935	-1.881	-0.33527	-0.92863	-1.2665	0.99116	-1.4413	-1.0315	-0.58549
1119	-180	-20	-180	1.1	243.64	98.8032	98.9273	172.683	0	0	0	1.285	0	0	2.0146	1.2698	0	-0.48842	0.98562	0	3.07	1.0085	0	1.8092	1.8965	-0.88048	1.7878	1.8849	0.88341	-1.5514	0.99727	-0.34479	-0.61785	1.4406	1.0208	-0.039066	1.8481	-0.55194
1120	-180	-20	-180	1.1	96.8508	114.73	114.879	198.663	0	0	0	1.3251	0	0	1.9011	1.3592	0	-0.13121	-1.0921	0	2.9874	1.2678	0	1.5904	1.9119	-0.89251	1.5863	1.9301	0.88048	0.63527	-1.8171	-0.30846	-0.56221	-1.4932	0.96682	-1.0437	-1.4183	-0.59654
1121	-180	-20	-180	1.1	145.558	94.6773	94.7769	140.147	0	0	0	1.2331	0	0	1.8042	1.3582	0	-0.90717	-0.62212	0	2.8906	1.2756	0	1.4763	1.9019	-0.89122	1.4733	1.9129	0.88393	-0.85809	-1.7288	-0.34228	-1.3642	-0.70135	1.0151	-1.8055	-0.21568	-0.54604
1122	-180	-20	-180	1.1	214.442	97.4244	97.5268	149.766	0	0	0	1.2386	0	0	1.8561	1.3767	0	-0.90717	0.62212	0	2.9358	1.2468	0	1.5581	1.9633	-0.87657	1.564	1.9352	0.89711	-1.8763	0.16271	-0.3374	-1.2058	0.90881	1.0432	-0.89023	1.6748	-0.47428
1123	-180	-20	-180	1.1	263.149	141.446	141.607	200.75	0	0	0	1.3637	0	0	2.2218	1.1401	0	-0.13121	1.0921	0	3.2369	0.74932	0	2.0919	1.7933	-0.88189	2.0546	1.7998	0.87081	-1.1683	1.4104	-0.36095	-0.12605	1.625	0.99307	0.43001	1.8069	-0.64274
1124	-180	-20	-180	2.5	180	58.4628	89.1186	99.4609	0	0	0	1.1707	0	0	1.993	1.2828	0	-2.5	0	0	3.0437	1.0064	0	1.7433	1.8544	-0.89404	1.7432	1.8542	0.8941	-2.3879	-1.008	-0.3669	-2.4674	0.19246	1.0622	-2.5742	0.82442	-0.69421
1125	-180	-20	-180	2.5	90	51.8042	59.2754	110.997	0	0	0	1.1818	0	0	1.8975	1.3404	0	0	-2.5	0	2.9669	1.1453	0	1.6105	1.8959	-0.89347	1.6105	1.899	0.89163	1.009	-2.4006	-0.36724	-0.15248	-2.6022	1.0661	-0.77337	-2.8634	-0.6646
1126	-180	-20	-180	2.5	270	60.4386	66.9972	105.634	0	0	0	1.1746	0	0	2.2758	0.9523	0	0	2.5	0	3.204	0.38342	0	2.2194	1.5593	-0.90282	2.2118	1.5863	0.88437	-1.017	2.529	-0.37016	0.11499	2.6189	1.0715	0.73237	2.9915	-0.62783
1127	-180	-20	-180	2.5	116.36	49.1654	56.0565	108.035	0	0	0	1.1764	0	0	1.9114	1.3262	0	-1.11	-2.24	0	2.9778	1.1166	0	1.6297	1.8853	-0.89278	1.6297	1.8856	0.89262	-0.28178	-2.8311	-0.36563	-1.3274	-2.2405	1.0589	-1.8817	-1.9305	-0.69008
1128	-180	-20	-180	2.5	243.64	46.4727	50.131	107.095	0	0	0	1.1746	0	0	2.0184	1.2321	0	-1.11	2.24	0	3.0655	0.9391	0	1.7786	1.8094	-0.89348	1.7757	1.8134	0.89033	-2.0146	1.7786	-0.36958	-1.0581	2.4568	1.0597	-0.56913	2.8933	-0.67375
1129	-180	-20	-180	2.5	96.8508	49.8793	56.6206	109.533	0	0	0	1.1804	0	0	1.9011	1.3358	0	-0.29821	-2.4822	0	2.9697	1.1368	0	1.6157	1.8927	-0.89307	1.6156	1.8945	0.89198	0.714	-2.553	-0.36886	-0.47296	-2.587	1.0621	-1.1214	-2.6597	-0.67903
1130	-180	-20	-180	2.5	145.558	54.4006	68.0694	107.206	0	0	0	1.1721	0	0	1.9425	1.3083	0	-2.0618	-1.4139	0	3.0033	1.0723	0	1.6724	1.8711	-0.89375	1.6722	1.8725	0.8929	-1.9172	-2.4323	-0.33545	-2.1367	-1.209	1.0579	-2.391	-0.66519	-0.70395
1131	-180	-20	-180	2.5	214.442	51.5406	60.3678	107.367	0	0	0	1.1735	0	0	1.9901	1.277	0	-2.0618	1.4139	0	3.043	1.0074	0	1.7373	1.8502	-0.89256	1.7377	1.8487	0.89362	-2.4852	0.49087	-0.36422	-2.0607	1.5957	1.0663	-1.9816	2.2589	-0.67186
1132	-180	-20	-180	2.5	263.149	53.6283	58.2092	106.203	0	0	0	1.1748	0	0	2.1858	1.059	0	-0.29821	2.4822	0	3.1681	0.59093	0	2.0596	1.659	-0.90076	2.0497	1.681	0.88503	-1.312	2.4021	-0.36984	-0.18995	2.6499	1.0655	0.39884	2.9954	-0.65033
1133	-180	-20	-180	1.30503	180	52.2261	52.2603	88.1052	0	0	0	1.2217	0	0	1.8419	1.3899	0	-1.305	0	0	2.9263	1.2791	0	1.5202	1.9418	-0.88823	1.5218	1.9328	0.89418	-1.8023	-0.93977	-0.34205	-1.6364	0.12481	1.0436	-1.7976	0.84405	-0.53812
1134	-180	-20	-180	1.30503	90	44.7846	44.8583	123.118	0	0	0	1.3016	0	0	1.877	1.3709	0	0	-1.305	0	2.9635	1.2877	0	1.5556	1.9176	-0.89144	1.554	1.9311	0.88322	0.87114	-1.8657	-0.31707	-0.28479	-1.6911	1.0004	-0.85675	-1.6971	-0.59766
1135	-180	-20	-180	1.30503	270	77.7795	77.8724	128.024	0	0	0	1.3323	0	0	2.3431	1.0232	0	0	1.305	0	3.2965	0.49802	0	2.3078	1.6642	-0.89433	2.2705	1.7014	0.86386	-0.98859	1.7034	-0.35982	0.1212	1.7727	0.98908	0.61445	1.8535	-0.71612
1136	-180	-20	-180	1.30503	116.36	8.80259	8.87099	83.2168	0	0	0	1.2414	0	0	1.8067	1.3581	0	-0.57945	-1.1693	0	2.8935	1.2831	0	1.4768	1.9004	-0.89038	1.4742	1.9115	0.88303	0.055448	-2.0032	-0.34182	-0.95142	-1.4082	1.009	-1.4858	-1.1499	-0.61964
1137	-180	-20	-180	1.30503	243.64	20.2329	20.3008	97.4369	0	0	0	1.2564	0	0	2.0262	1.26	0	-0.57945	1.1693	0	3.076	0.97581	0	1.8374	1.8737	-0.8894	1.8125	1.8769	0.8813	-1.6167	1.0979	-0.34981	-0.64758	1.5851	1.0207	-0.10545	1.9536	-0.60667
1138	-180	-20	-180	1.30503	96.8508	26.769	26.84	109.576	0	0	0	1.2788	0	0	1.8537	1.3629	0	-0.15567	-1.2957	0	2.94	1.2801	0	1.5322	1.9088	-0.89172	1.5301	1.9241	0.88204	0.68275	-1.9042	-0.3294	-0.45776	-1.6499	1.0034	-1.0348	-1.59	-0.60615
1139	-180	-20	-180	1.30503	145.558	28.6655	28.7078	78.6814	0	0	0	1.2251	0	0	1.7834	1.3704	0	-1.0763	-0.73808	0	2.8711	1.3009	0	1.4425	1.9031	-0.8916	1.4384	1.9139	0.88405	-0.99534	-1.8032	-0.33637	-1.4869	-0.75332	1.0199	-1.8603	-0.26718	-0.60812
1140	-180	-20	-180	1.30503	214.442	30.0095	30.0494	86.5974	0	0	0	1.2275	0	0	1.8876	1.3693	0	-1.0763	0.73808	0	2.9654	1.2184	0	1.6013	1.9523	-0.88159	1.602	1.9279	0.89738	-1.9499	0.17457	-0.34898	-1.3196	1.0004	1.045	-1.0462	1.7192	-0.53078
1141	-180	-20	-180	1.30503	263.149	53.7495	53.8375	117.07	0	0	0	1.3052	0	0	2.2484	1.0999	0	-0.15567	1.2957	0	3.2335	0.63756	0	2.1778	1.7362	-0.89402	2.1372	1.7646	0.86823	-1.1714	1.5798	-0.35471	-0.076113	1.7562	0.99756	0.44703	1.8933	-0.68427
1142	-180	-20	-180	2.29497	180	64.4635	89.5668	105.577	0	0	0	1.1724	0	0	2.0011	1.2799	0	-2.295	0	0	3.0507	0.99895	0	1.7542	1.8534	-0.89367	1.7541	1.852	0.89452	-2.2288	-1.0113	-0.36808	-2.3125	0.17836	1.0652	-2.5322	0.80698	-0.67922
1143	-180	-20	-180	2.29497	90	49.6963	51.103	114.354	0	0	0	1.1952	0	0	1.8417	1.3705	0	0	-2.295	0	2.9199	1.2274	0	1.5326	1.9161	-0.89279	1.5323	1.9206	0.89006	1.0135	-2.2795	-0.36889	-0.13514	-2.459	1.0622	-0.78031	-2.6704	-0.6523
1144	-180	-20	-180	2.29497	270	62.403	64.1308	109.996	0	0	0	1.1816	0	0	2.3276	0.88635	0	0	2.295	0	3.2181	0.26035	0	2.3279	1.4865	-0.90962	2.3067	1.534	0.87713	-0.99399	2.5367	-0.36178	0.16419	2.4941	1.0537	0.77235	2.6293	-0.67731
1145	-180	-20	-180	2.29497	116.36	45.6353	46.9524	109.671	0	0	0	1.1841	0	0	1.8557	1.3522	0	-1.019	-2.0563	0	2.9308	1.1901	0	1.5522	1.9018	-0.89184	1.5521	1.9024	0.89149	-0.22992	-2.703	-0.36185	-1.2656	-2.1051	1.0525	-1.8142	-1.7958	-0.68531
1146	-180	-20	-180	2.29497	243.64	42.1062	42.2717	107.756	0	0	0	1.1808	0	0	2.0273	1.2154	0	-1.019	2.0563	0	3.0738	0.91914	0	1.7943	1.7954	-0.89422	1.7886	1.8015	0.88909	-1.9613	1.6737	-0.36912	-0.9974	2.319	1.0518	-0.48793	2.7254	-0.66793
1147	-180	-20	-180	2.29497	96.8508	46.443	47.5196	111.678	0	0	0	1.1918	0	0	1.8458	1.364	0	-0.27376	-2.2786	0	2.923	1.215	0	1.5386	1.9114	-0.89225	1.5383	1.914	0.8906	0.7302	-2.4308	-0.36941	-0.44463	-2.4396	1.057	-1.1002	-2.4863	-0.6686
1148	-180	-20	-180	2.29497	145.558	55.8657	62.7642	112.199	0	0	0	1.1764	0	0	1.8995	1.3296	0	-1.8927	-1.298	0	2.968	1.1301	0	1.6114	1.8843	-0.89339	1.6109	1.8867	0.89184	-1.79	-2.3249	-0.3294	-2.0373	-1.1089	1.0546	-2.2784	-0.57225	-0.70024
1149	-180	-20	-180	2.29497	214.442	51.256	54.5061	110.702	0	0	0	1.1784	0	0	1.992	1.2748	0	-1.8927	1.298	0	3.0461	1.0089	0	1.7396	1.8503	-0.8917	1.74	1.8472	0.89376	-2.3769	0.40599	-0.36742	-1.9492	1.4862	1.0649	-1.8454	2.1595	-0.65603
1150	-180	-20	-180	2.29497	263.149	52.6961	53.3572	108.776	0	0	0	1.182	0	0	2.2234	1.0131	0	-0.27376	2.2786	0	3.1857	0.50516	0	2.1362	1.6128	-0.90599	2.1156	1.6483	0.88021	-1.292	2.3502	-0.36487	-0.14811	2.5172	1.0511	0.45032	2.719	-0.67275
1151	-180	-20	-180	1.15328	180	86.0643	86.1301	120.904	0	0	0	1.2235	0	0	1.8336	1.3841	0	-1.1533	0	0	2.9176	1.2753	0	1.5151	1.9411	-0.88681	1.5181	1.9302	0.89456	-1.731	-0.93249	-0.3394	-1.5276	0.09784	1.0444	-1.7245	0.87208	-0.48169
1152	-180	-20	-180	1.15328	90	101.886	101.975	180.77	0	0	0	1.3436	0	0	1.9199	1.3679	0	0	-1.1533	0	3.0063	1.2769	0	1.6072	1.9207	-0.89147	1.6039	1.9341	0.88273	0.81739	-1.8128	-0.2975	-0.3936	-1.5805	0.96872	-0.87958	-1.5596	-0.6007
1153	-180	-20	-180	1.15328	270	133.807	133.913	179.875	0	0	0	1.3829	0	0	2.3208	1.0674	0	0	1.1533	0	3.306	0.60541	0	2.2314	1.722	-0.8858	2.1941	1.745	0.86433	-1.011	1.5641	-0.36797	0.061789	1.682	0.98411	0.58226	1.7972	-0.6901
1154	-180	-20	-180	1.15328	116.36	54.1317	54.2275	126.93	0	0	0	1.2558	0	0	1.8275	1.3516	0	-0.51208	-1.0334	0	2.9139	1.2693	0	1.5054	1.8983	-0.89141	1.502	1.9138	0.88114	0.08687	-1.9107	-0.33712	-0.92831	-1.3033	0.99738	-1.4506	-1.0619	-0.59468
1155	-180	-20	-180	1.15328	243.64	67.0796	67.1758	142.183	0	0	0	1.2754	0	0	2.0182	1.2672	0	-0.51208	1.0334	0	3.0717	0.99782	0	1.8193	1.8903	-0.88329	1.7959	1.8833	0.88255	-1.5669	1.0225	-0.34574	-0.62152	1.4772	1.0203	-0.056138	1.8722	-0.56916
1156	-180	-20	-180	1.53212	180	54.0634	54.0371	90.0346	0	0	0	1.2239	0	0	1.8517	1.396	0	-1.5321	0	0	2.9369	1.2842	0	1.5274	1.9434	-0.8897	1.528	1.9373	0.8934	-1.9139	-0.9628	-0.35043	-1.8066	0.14925	1.0443	-1.9244	0.82564	-0.59994
1157	-180	-20	-180	1.53212	90	21.2957	21.3101	98.3382	0	0	0	1.2687	0	0	1.8337	1.3782	0	0	-1.5321	0	2.9208	1.3058	0	1.5041	1.9193	-0.89129	1.503	1.9307	0.88437	0.93513	-1.9485	-0.34036	-0.20093	-1.8606	1.0254	-0.83798	-1.9042	-0.60638
1158	-180	-20	-180	1.53212	270	54.1287	54.1689	107.072	0	0	0	1.2895	0	0	2.3641	0.97904	0	0	1.5321	0	3.2835	0.39593	0	2.3788	1.605	-0.90146	2.3422	1.6525	0.8655	-0.97281	1.9171	-0.35407	0.17752	1.9169	1.0028	0.66834	1.9607	-0.73066
1159	-180	-20	-180	1.53212	116.36	0.33079	0.328198	74.6993	0	0	0	1.2286	0	0	1.7845	1.369	0	-0.68029	-1.3728	0	2.8715	1.3007	0	1.4473	1.9068	-0.88949	1.4457	1.913	0.88539	-0.0022033	-2.156	-0.3477	-1.0128	-1.565	1.0222	-1.5526	-1.2861	-0.64684
1160	-180	-20	-180	1.53212	243.64	8.23083	8.23145	86.4039	0	0	0	1.2372	0	0	2.0317	1.2464	0	-0.68029	1.3728	0	3.0797	0.95436	0	1.8432	1.8489	-0.89453	1.8207	1.8601	0.88174	-1.6974	1.2201	-0.35641	-0.71145	1.7482	1.0267	-0.18137	2.1019	-0.63868
1161	-180	-20	-180	2.06788	180	75.0178	88.657	117.237	0	0	0	1.1796	0	0	2.0124	1.2827	0	-2.0679	0	0	3.062	1.0002	0	1.7684	1.8637	-0.89011	1.7677	1.851	0.89777	-2.0036	-1.0127	-0.36858	-2.0665	0.11201	1.0773	-2.7091	0.689	-0.54733
1162	-180	-20	-180	2.06788	90	40.7191	40.6249	110.727	0	0	0	1.2168	0	0	1.7976	1.3906	0	0	-2.0679	0	2.8823	1.2985	0	1.4693	1.928	-0.89191	1.4686	1.9344	0.88798	1.0099	-2.162	-0.36757	-0.13215	-2.2832	1.0552	-0.79611	-2.4413	-0.63812
1163	-180	-20	-180	2.06788	270	60.7137	60.6535	112.365	0	0	0	1.2018	0	0	2.3658	0.86484	0	0	2.0679	0	3.2341	0.20799	0	2.4101	1.4661	-0.90961	2.3813	1.5194	0.87316	-0.95135	2.4674	-0.34626	0.22777	2.3096	1.0323	0.7635	2.3064	-0.72088
1164	-180	-20	-180	2.06788	116.36	34.7208	34.619	103.968	0	0	0	1.1975	0	0	1.7952	1.3756	0	-0.91817	-1.8529	0	2.878	1.2691	0	1.4678	1.9145	-0.89056	1.4675	1.9157	0.88978	-0.16613	-2.5474	-0.35751	-1.1918	-1.9455	1.0445	-1.7349	-1.639	-0.67819
1165	-180	-20	-180	2.06788	243.64	32.553	32.4619	104.015	0	0	0	1.1937	0	0	2.0312	1.2135	0	-0.91817	1.8529	0	3.0779	0.91698	0	1.8121	1.7984	-0.89545	1.8019	1.8075	0.88723	-1.8875	1.5385	-0.36691	-0.91134	2.1473	1.0452	-0.39116	2.5314	-0.66303
1166	-180	-20	-180	2.44672	180	59.7126	89.4151	100.641	0	0	0	1.171	0	0	1.9945	1.2821	0	-2.4467	0	0	3.045	1.0048	0	1.7454	1.854	-0.89402	1.7453	1.8537	0.89414	-2.3483	-1.0091	-0.3673	-2.4241	0.19067	1.0627	-2.5363	0.82373	-0.69312
1167	-180	-20	-180	2.44672	90	51.5634	57.2819	112.14	0	0	0	1.1845	0	0	1.8843	1.3479	0	0	-2.4467	0	2.956	1.1647	0	1.5921	1.901	-0.89331	1.5921	1.9044	0.89128	1.0108	-2.3695	-0.36789	-0.14737	-2.566	1.0654	-0.77538	-2.8123	-0.66161
1168	-180	-20	-180	2.44672	270	61.0649	66.2976	106.79	0	0	0	1.1758	0	0	2.2886	0.93489	0	0	2.4467	0	3.2078	0.3517	0	2.2456	1.5401	-0.90484	2.2345	1.5727	0.88244	-1.0151	2.5264	-0.36947	0.12084	2.5859	1.0686	0.7458	2.9041	-0.63702
1169	-180	-20	-180	2.44672	116.36	48.5842	53.865	108.746	0	0	0	1.178	0	0	1.8994	1.332	0	-1.0864	-2.1923	0	2.9679	1.1326	0	1.6131	1.8892	-0.89257	1.6131	1.8895	0.89237	-0.26793	-2.7979	-0.36478	-1.3112	-2.2053	1.0575	-1.8644	-1.8958	-0.68905
1170	-180	-20	-180	2.44672	243.64	45.6681	48.1771	107.513	0	0	0	1.1758	0	0	2.0211	1.2274	0	-1.0864	2.1923	0	3.0679	0.93299	0	1.7832	1.8055	-0.89365	1.7797	1.81	0.89005	-2.0017	1.7518	-0.36968	-1.0424	2.4204	1.058	-0.54721	2.8492	-0.67213
1171	-180	20	-180	1.8	180	78.0218	77.9346	113.554	0	0	0	1.2259	0	0	1.8862	1.3964	0	-1.8	0	0	2.9698	1.2643	0	1.5724	1.9408	-0.89489	1.5713	1.9498	0.88937	-2.0062	-0.99672	0.36278	-2.1344	0.81494	0.63263	-1.9993	0.1447	-1.0548
1172	-180	20	-180	1.8	90	27.321	27.2744	101.642	0	0	0	1.242	0	0	1.8013	1.3879	0	0	-1.8	0	2.8882	1.317	0	1.4672	1.934	-0.88605	1.4681	1.9254	0.89131	0.98499	-2.0525	0.35851	-0.81998	-2.1609	0.62204	-0.15376	-2.0656	-1.0441
1173	-180	20	-180	1.8	270	55.7155	55.6994	109.72	0	0	0	1.2434	0	0	2.3731	0.91907	0	0	1.8	0	3.2603	0.2878	0	2.3849	1.5835	-0.86877	2.4191	1.5305	0.90651	-0.95877	2.1934	0.34896	0.72534	2.1072	0.73125	0.2163	2.0962	-1.0203
1174	-180	20	-180	1.8	116.36	16.7063	16.6415	89.6213	0	0	0	1.214	0	0	1.7754	1.3779	0	-0.79923	-1.6128	0	2.8615	1.302	0	1.4373	1.9167	-0.8877	1.4381	1.9139	0.88957	-0.080811	-2.3485	0.35318	-1.641	-1.4555	0.66644	-1.0989	-1.7514	-1.0351
1175	-180	20	-180	1.8	243.64	19.2358	19.1802	95.8634	0	0	0	1.2148	0	0	2.0324	1.2271	0	-0.79923	1.6128	0	3.0798	0.93221	0	1.815	1.832	-0.8843	1.8317	1.8196	0.89627	-1.7936	1.3755	0.36266	-0.27957	2.306	0.65563	-0.8059	1.9432	-1.0369
1176	-180	20	-180	1.8	96.8508	19.4236	19.3697	95.6822	0	0	0	1.2311	0	0	1.7955	1.381	0	-0.21471	-1.7871	0	2.8818	1.3048	0	1.4627	1.9264	-0.88653	1.4635	1.9199	0.8906	0.73857	-2.1505	0.36027	-1.0618	-2.0219	0.64195	-0.41061	-2.0391	-1.0398
1177	-180	20	-180	1.8	145.558	42.4991	42.4314	100.239	0	0	0	1.2086	0	0	1.7538	1.3894	0	-1.4845	-1.018	0	2.8413	1.3249	0	1.4003	1.9191	-0.88684	1.4032	1.9125	0.89152	-1.3844	-2.0519	0.33094	-2.0415	-0.38708	0.67923	-1.7798	-0.90383	-1.0372
1178	-180	20	-180	1.8	214.442	36.9113	36.8385	100.279	0	0	0	1.2072	0	0	1.9577	1.3146	0	-1.4845	1.018	0	3.0255	1.1027	0	1.6927	1.883	-0.89498	1.6929	1.8941	0.88809	-2.1398	0.24155	0.36797	-1.4516	1.9189	0.61176	-1.6395	1.2301	-1.0551
1179	-180	20	-180	1.8	263.149	38.92	38.9014	103.002	0	0	0	1.2328	0	0	2.27	1.0249	0	-0.21471	1.7871	0	3.2177	0.48945	0	2.2086	1.6819	-0.87168	2.244	1.636	0.90638	-1.2199	2.0163	0.35331	0.48812	2.2011	0.70525	-0.056498	2.111	-1.0246
1180	-180	20	-180	1.1	180	111.906	111.986	146.03	0	0	0	1.2253	0	0	1.8296	1.3816	0	-1.1	0	0	2.9135	1.2747	0	1.5158	1.9296	-0.89442	1.5122	1.9404	0.88634	-1.7078	-0.93346	0.33975	-1.7008	0.8871	0.46208	-1.4962	0.088858	-1.0421
1181	-180	20	-180	1.1	90	136.931	137.03	216.228	0	0	0	1.3664	0	0	1.9397	1.3673	0	0	-1.1	0	3.0262	1.2742	0	1.6264	1.9356	-0.88282	1.6309	1.9233	0.89135	0.7959	-1.7952	0.28968	-0.89253	-1.5106	0.60659	-0.45445	-1.5437	-0.94766
1182	-180	20	-180	1.1	270	168.321	168.438	211.966	0	0	0	1.4133	0	0	2.3115	1.0909	0	0	1.1	0	3.3113	0.66186	0	2.1588	1.7662	-0.86544	2.1951	1.7516	0.88121	-1.024	1.5143	0.37271	0.57193	1.7819	0.67766	0.037705	1.6549	-0.98226
1183	-180	20	-180	1.1	116.36	85.4903	85.6128	157.065	0	0	0	1.2633	0	0	1.8364	1.3497	0	-0.48842	-0.98562	0	2.9227	1.2648	0	1.5138	1.9155	-0.88041	1.5177	1.8982	0.89185	0.095935	-1.881	0.33527	-1.4413	-1.0315	0.58549	-0.92863	-1.2665	-0.99116
1184	-180	20	-180	1.1	243.64	98.8032	98.9273	172.683	0	0	0	1.285	0	0	2.0146	1.2698	0	-0.48842	0.98562	0	3.07	1.0085	0	1.7878	1.8849	-0.88341	1.8092	1.8965	0.88048	-1.5514	0.99727	0.34479	-0.039066	1.8481	0.55194	-0.61785	1.4406	-1.0208
1185	-180	20	-180	1.1	96.8508	114.73	114.879	198.663	0	0	0	1.3251	0	0	1.9011	1.3592	0	-0.13121	-1.0921	0	2.9874	1.2678	0	1.5863	1.9301	-0.88047	1.5904	1.9119	0.89251	0.63527	-1.8171	0.30846	-1.0437	-1.4183	0.59653	-0.56221	-1.4932	-0.96682
1186	-180	20	-180	1.1	145.558	94.6773	94.7769	140.147	0	0	0	1.2331	0	0	1.8042	1.3582	0	-0.90717	-0.62212	0	2.8906	1.2756	0	1.4733	1.9129	-0.88393	1.4763	1.9019	0.89122	-0.85809	-1.7288	0.34228	-1.8055	-0.21568	0.54604	-1.3642	-0.70135	-1.0151
1187	-180	20	-180	1.1	214.442	97.4244	97.5268	149.766	0	0	0	1.2386	0	0	1.8561	1.3767	0	-0.90717	0.62212	0	2.9358	1.2468	0	1.564	1.9352	-0.89711	1.5581	1.9633	0.87657	-1.8763	0.16271	0.3374	-0.89023	1.6748	0.47428	-1.2058	0.90881	-1.0432
1188	-180	20	-180	1.1	263.149	141.446	141.607	200.75	0	0	0	1.3637	0	0	2.2218	1.1401	0	-0.13121	1.0921	0	3.2369	0.74932	0	2.0546	1.7998	-0.87081	2.0919	1.7933	0.88189	-1.1683	1.4104	0.36095	0.43001	1.8069	0.64274	-0.12605	1.625	-0.99307
1189	-180	20	-180	2.5	180	58.4628	89.1186	99.4609	0	0	0	1.1707	0	0	1.993	1.2828	0	-2.5	0	0	3.0437	1.0064	0	1.7432	1.8542	-0.8941	1.7433	1.8544	0.89404	-2.3879	-1.008	0.3669	-2.5742	0.82442	0.69421	-2.4674	0.19246	-1.0622
1190	-180	20	-180	2.5	90	51.8042	59.2754	110.997	0	0	0	1.1818	0	0	1.8975	1.3404	0	0	-2.5	0	2.9669	1.1453	0	1.6105	1.899	-0.89163	1.6105	1.8959	0.89347	1.009	-2.4006	0.36724	-0.77337	-2.8634	0.6646	-0.15248	-2.6022	-1.0661
1191	-180	20	-180	2.5	270	60.4386	66.9972	105.634	0	0	0	1.1746	0	0	2.2758	0.9523	0	0	2.5	0	3.204	0.38342	0	2.2118	1.5863	-0.88437	2.2194	1.5593	0.90282	-1.017	2.529	0.37016	0.73237	2.9915	0.62783	0.11499	2.6189	-1.0715
1192	-180	20	-180	2.5	116.36	49.1654	56.0565	108.035	0	0	0	1.1764	0	0	1.9114	1.3262	0	-1.11	-2.24	0	2.9778	1.1166	0	1.6297	1.8856	-0.89262	1.6297	1.8853	0.89278	-0.28178	-2.8311	0.36563	-1.8817	-1.9305	0.69008	-1.3274	-2.2405	-1.0589
1193	-180	20	-180	2.5	243.64	46.4727	50.131	107.095	0	0	0	1.1746	0	0	2.0184	1.2321	0	-1.11	2.24	0	3.0655	0.9391	0	1.7757	1.8134	-0.89033	1.7786	1.8094	0.89348	-2.0146	1.7786	0.36958	-0.56913	2.8933	0.67375	-1.0581	2.4568	-1.0597
1194	-180	20	-180	2.5	96.8508	49.8793	56.6206	109.533	0	0	0	1.1804	0	0	1.9011	1.3358	0	-0.29821	-2.4822	0	2.9697	1.1368	0	1.6156	1.8945	-0.89198	1.6157	1.8927	0.89307	0.714	-2.553	0.36886	-1.1214	-2.6597	0.67903	-0.47296	-2.587	-1.0621
1195	-180	20	-180	2.5	145.558	54.4006	68.0694	107.206	0	0	0	1.1721	0	0	1.9425	1.3083	0	-2.0618	-1.4139	0	3.0033	1.0723	0	1.6722	1.8725	-0.8929	1.6724	1.8711	0.89375	-1.9172	-2.4323	0.33545	-2.391	-0.66519	0.70395	-2.1367	-1.209	-1.0579
1196	-180	20	-180	2.5	214.442	51.5406	60.3678	107.367	0	0	0	1.1735	0	0	1.9901	1.277	0	-2.0618	1.4139	0	3.043	1.0074	0	1.7377	1.8487	-0.89362	1.7373	1.8502	0.89256	-2.4852	0.49087	0.36422	-1.9816	2.2589	0.67186	-2.0607	1.5957	-1.0663
1197	-180	20	-180	2.5	263.149	53.6283	58.2092	106.203	0	0	0	1.1748	0	0	2.1858	1.059	0	-0.29821	2.4822	0	3.1681	0.59093	0	2.0497	1.681	-0.88503	2.0596	1.659	0.90076	-1.312	2.4021	0.36984	0.39884	2.9954	0.65033	-0.18995	2.6499	-1.0655
1198	-180	20	-180	1.30503	180	52.2261	52.2603	88.1052	0	0	0	1.2217	0	0	1.8419	1.3899	0	-1.305	0	0	2.9263	1.2791	0	1.5218	1.9328	-0.89418	1.5202	1.9418	0.88823	-1.8023	-0.93977	0.34205	-1.7976	0.84405	0.53812	-1.6364	0.12481	-1.0436
1199	-180	20	-180	1.30503	90	44.7846	44.8583	123.118	0	0	0	1.3016	0	0	1.877	1.3709	0	0	-1.305	0	2.9635	1.2877	0	1.554	1.9311	-0.88322	1.5556	1.9176	0.89144	0.87114	-1.8657	0.31707	-0.85675	-1.6971	0.59766	-0.28479	-1.6911	-1.0004
1200	-180	20	-180	1.30503	270	77.7795	77.8724	128.024	0	0	0	1.3323	0	0	2.3431	1.0232	0	0	1.305	0	3.2965	0.49802	0	2.2705	1.7014	-0.86386	2.3078	1.6642	0.89433	-0.98859	1.7034	0.35982	0.61445	1.8535	0.71612	0.1212	1.7727	-0.98908
1201	-180	20	-180	1.30503	116.36	8.80259	8.87099	83.2168	0	0	0	1.2414	0	0	1.8067	1.3581	0	-0.57945	-1.1693	0	2.8935	1.2831	0	1.4742	1.9115	-0.88303	1.4768	1.9004	0.89038	0.055448	-2.0032	0.34182	-1.4858	-1.1499	0.61964	-0.95142	-1.4082	-1.009
1202	-180	20	-180	1.30503	243.64	20.2329	20.3008	97.4369	0	0	0	1.2564	0	0	2.0262	1.26	0	-0.57945	1.1693	0	3.076	0.97581	0	1.8125	1.8769	-0.8813	1.8374	1.8737	0.8894	-1.6167	1.0979	0.34981	-0.10545	1.9536	0.60667	-0.64758	1.5851	-1.0207
1203	-180	20	-180	1.30503	96.8508	26.769	26.84	109.576	0	0	0	1.2788	0	0	1.8537	1.3629	0	-0.15567	-1.2957	0	2.94	1.2801	0	1.5301	1.9241	-0.88204	1.5322	1.9088	0.89172	0.68275	-1.9042	0.3294	-1.0348	-1.59	0.60615	-0.45776	-1.6499	-1.0034
1204	-180	20	-180	1.30503	145.558	28.6655	28.7078	78.6814	0	0	0	1.2251	0	0	1.7834	1.3704	0	-1.0763	-0.73808	0	2.8711	1.3009	0	1.4384	1.9139	-0.88405	1.4425	1.9031	0.8916	-0.99534	-1.8032	0.33637	-1.8603	-0.26718	0.60812	-1.4869	-0.75332	-1.0199
1205	-180	20	-180	1.30503	214.442	30.0095	30.0494	86.5974	0	0	0	1.2275	0	0	1.8876	1.3693	0	-1.0763	0.73808	0	2.9654	1.2184	0	1.602	1.9279	-0.89738	1.6013	1.9523	0.88159	-1.9499	0.17457	0.34898	-1.0462	1.7192	0.53078	-1.3196	1.0004	-1.045
1206	-180	20	-180	1.30503	263.149	53.7495	53.8375	117.07	0	0	0	1.3052	0	0	2.2484	1.0999	0	-0.15567	1.2957	0	3.2335	0.63756	0	2.1372	1.7646	-0.86823	2.1778	1.7362	0.89402	-1.1714	1.5798	0.35471	0.44703	1.8933	0.68427	-0.076113	1.7562	-0.99756
1207	-180	20	-180	2.29497	180	64.4635	89.5668	105.577	0	0	0	1.1724	0	0	2.0011	1.2799	0	-2.295	0	0	3.0507	0.99895	0	1.7541	1.852	-0.89452	1.7542	1.8534	0.89367	-2.2288	-1.0113	0.36808	-2.5322	0.80698	0.67922	-2.3125	0.17836	-1.0652
1208	-180	20	-180	2.29497	90	49.6963	51.103	114.354	0	0	0	1.1952	0	0	1.8417	1.3705	0	0	-2.295	0	2.9199	1.2274	0	1.5323	1.9206	-0.89006	1.5326	1.9161	0.89279	1.0135	-2.2795	0.36889	-0.78031	-2.6704	0.65229	-0.13514	-2.459	-1.0622
1209	-180	20	-180	2.29497	270	62.403	64.1308	109.996	0	0	0	1.1816	0	0	2.3276	0.88635	0	0	2.295	0	3.2181	0.26035	0	2.3067	1.534	-0.87713	2.3279	1.4865	0.90962	-0.99399	2.5367	0.36178	0.77235	2.6293	0.67731	0.16419	2.4941	-1.0537
1210	-180	20	-180	2.29497	116.36	45.6353	46.9524	109.671	0	0	0	1.1841	0	0	1.8557	1.3522	0	-1.019	-2.0563	0	2.9308	1.1901	0	1.5521	1.9024	-0.89149	1.5522	1.9018	0.89184	-0.22992	-2.703	0.36185	-1.8142	-1.7958	0.68531	-1.2656	-2.1051	-1.0525
1211	-180	20	-180	2.29497	243.64	42.1062	42.2717	107.756	0	0	0	1.1808	0	0	2.0273	1.2154	0	-1.019	2.0563	0	3.0738	0.91914	0	1.7886	1.8015	-0.88909	1.7943	1.7954	0.89422	-1.9613	1.6737	0.36912	-0.48793	2.7254	0.66793	-0.9974	2.319	-1.0518
1212	-180	20	-180	2.29497	96.8508	46.443	47.5196	111.678	0	0	0	1.1918	0	0	1.8458	1.364	0	-0.27376	-2.2786	0	2.923	1.215	0	1.5383	1.914	-0.8906	1.5386	1.9114	0.89225	0.7302	-2.4308	0.36941	-1.1002	-2.4863	0.6686	-0.44463	-2.4396	-1.057
1213	-180	20	-180	2.29497	145.558	55.8657	62.7642	112.199	0	0	0	1.1764	0	0	1.8995	1.3296	0	-1.8927	-1.298	0	2.968	1.1301	0	1.6109	1.8867	-0.89184	1.6114	1.8843	0.89339	-1.79	-2.3249	0.3294	-2.2784	-0.57225	0.70024	-2.0373	-1.1089	-1.0546
1214	-180	20	-180	2.29497	214.442	51.256	54.5061	110.702	0	0	0	1.1784	0	0	1.992	1.2748	0	-1.8927	1.298	0	3.0461	1.0089	0	1.74	1.8472	-0.89376	1.7396	1.8503	0.8917	-2.3769	0.40599	0.36742	-1.8454	2.1595	0.65603	-1.9492	1.4862	-1.0649
1215	-180	20	-180	2.29497	263.149	52.6961	53.3572	108.776	0	0	0	1.182	0	0	2.2234	1.0131	0	-0.27376	2.2786	0	3.1857	0.50516	0	2.1156	1.6483	-0.88021	2.1362	1.6128	0.90599	-1.292	2.3502	0.36487	0.45032	2.719	0.67275	-0.14811	2.5172	-1.0511
1216	-180	20	-180	1.15328	180	86.0643	86.1301	120.904	0	0	0	1.2235	0	0	1.8336	1.3841	0	-1.1533	0	0	2.9176	1.2753	0	1.5181	1.9302	-0.89456	1.5151	1.941	0.88681	-1.731	-0.93249	0.3394	-1.7245	0.87208	0.48169	-1.5276	0.097841	-1.0444
1217	-180	20	-180	1.15328	90	101.886	101.975	180.77	0	0	0	1.3436	0	0	1.9199	1.3679	0	0	-1.1533	0	3.0063	1.2769	0	1.6039	1.9341	-0.88273	1.6072	1.9207	0.89147	0.81739	-1.8128	0.2975	-0.87958	-1.5596	0.6007	-0.3936	-1.5805	-0.96872
1218	-180	20	-180	1.15328	270	133.807	133.913	179.875	0	0	0	1.3829	0	0	2.3208	1.0674	0	0	1.1533	0	3.306	0.60541	0	2.1941	1.745	-0.86433	2.2314	1.722	0.8858	-1.011	1.5641	0.36797	0.58226	1.7972	0.6901	0.061789	1.682	-0.98411
1219	-180	20	-180	1.15328	116.36	54.1317	54.2275	126.93	0	0	0	1.2558	0	0	1.8275	1.3516	0	-0.51208	-1.0334	0	2.9139	1.2693	0	1.502	1.9138	-0.88114	1.5054	1.8983	0.89141	0.08687	-1.9107	0.33712	-1.4506	-1.0619	0.59468	-0.92831	-1.3033	-0.99738
1220	-180	20	-180	1.15328	243.64	67.0796	67.1758	142.183	0	0	0	1.2754	0	0	2.0182	1.2672	0	-0.51208	1.0334	0	3.0717	0.99782	0	1.7959	1.8833	-0.88255	1.8193	1.8903	0.88329	-1.5669	1.0225	0.34574	-0.056138	1.8722	0.56916	-0.62152	1.4772	-1.0203
1221	-180	20	-180	1.53212	180	54.0634	54.0371	90.0346	0	0	0	1.2239	0	0	1.8517	1.396	0	-1.5321	0	0	2.9369	1.2842	0	1.528	1.9373	-0.8934	1.5274	1.9434	0.8897	-1.9139	-0.9628	0.35043	-1.9244	0.82564	0.59994	-1.8066	0.14925	-1.0443
1222	-180	20	-180	1.53212	90	21.2957	21.3101	98.3382	0	0	0	1.2687	0	0	1.8337	1.3782	0	0	-1.5321	0	2.9208	1.3058	0	1.503	1.9307	-0.88437	1.5041	1.9193	0.89129	0.93513	-1.9485	0.34036	-0.83798	-1.9042	0.60638	-0.20093	-1.8606	-1.0254
1223	-180	20	-180	1.53212	270	54.1287	54.169	107.072	0	0	0	1.2895	0	0	2.3641	0.97904	0	0	1.5321	0	3.2835	0.39593	0	2.3422	1.6525	-0.8655	2.3788	1.6049	0.90147	-0.97281	1.9171	0.35407	0.66834	1.9607	0.73066	0.17752	1.9169	-1.0028
1224	-180	20	-180	1.53212	116.36	0.33079	0.328198	74.6993	0	0	0	1.2286	0	0	1.7845	1.369	0	-0.68029	-1.3728	0	2.8715	1.3007	0	1.4457	1.913	-0.88539	1.4473	1.9068	0.88949	-0.0022033	-2.156	0.3477	-1.5526	-1.2861	0.64684	-1.0128	-1.565	-1.0222
1225	-180	20	-180	1.53212	243.64	8.23083	8.23145	86.4039	0	0	0	1.2372	0	0	2.0317	1.2464	0	-0.68029	1.3728	0	3.0797	0.95436	0	1.8207	1.8601	-0.88174	1.8432	1.8489	0.89453	-1.6974	1.2201	0.35641	-0.18137	2.1019	0.63868	-0.71145	1.7482	-1.0267
1226	-180	20	-180	2.06788	180	75.0178	88.657	117.237	0	0	0	1.1796	0	0	2.0124	1.2827	0	-2.0679	0	0	3.062	1.0002	0	1.7677	1.851	-0.89777	1.7684	1.8637	0.89011	-2.0036	-1.0127	0.36858	-2.7091	0.689	0.54733	-2.0665	0.11201	-1.0773
1227	-180	20	-180	2.06788	90	40.7191	40.6249	110.727	0	0	0	1.2168	0	0	1.7976	1.3906	0	0	-2.0679	0	2.8823	1.2985	0	1.4686	1.9344	-0.88798	1.4693	1.928	0.89191	1.0099	-2.162	0.36757	-0.79611	-2.4413	0.63812	-0.13215	-2.2832	-1.0552
1228	-180	20	-180	2.06788	270	60.7137	60.6535	112.365	0	0	0	1.2018	0	0	2.3658	0.86484	0	0	2.0679	0	3.2341	0.20799	0	2.3813	1.5194	-0.87316	2.4101	1.4661	0.90961	-0.95135	2.4674	0.34626	0.7635	2.3064	0.72088	0.22777	2.3096	-1.0323
1229	-180	20	-180	2.06788	116.36	34.7208	34.619	103.968	0	0	0	1.1975	0	0	1.7952	1.3756	0	-0.91817	-1.8529	0	2.878	1.2691	0	1.4675	1.9157	-0.88978	1.4678	1.9145	0.89056	-0.16613	-2.5474	0.35751	-1.7349	-1.639	0.67819	-1.1918	-1.9455	-1.0445
1230	-180	20	-180	2.06788	243.64	32.553	32.4619	104.015	0	0	0	1.1937	0	0	2.0312	1.2135	0	-0.91817	1.8529	0	3.0779	0.91698	0	1.8019	1.8075	-0.88723	1.8121	1.7984	0.89545	-1.8875	1.5385	0.36691	-0.39116	2.5314	0.66303	-0.91134	2.1473	-1.0452
1231	-180	20	-180	2.44672	180	59.7126	89.4151	100.641	0	0	0	1.171	0	0	1.9945	1.2821	0	-2.4467	0	0	3.045	1.0048	0	1.7453	1.8537	-0.89414	1.7454	1.854	0.89402	-2.3483	-1.0091	0.3673	-2.5363	0.82374	0.69312	-2.4241	0.19067	-1.0627
1232	-180	20	-180	2.44672	90	51.5634	57.2819	112.14	0	0	0	1.1845	0	0	1.8843	1.3479	0	0	-2.4467	0	2.956	1.1647	0	1.5921	1.9044	-0.89128	1.5921	1.901	0.89331	1.0108	-2.3695	0.36789	-0.77538	-2.8123	0.66161	-0.14737	-2.566	-1.0654
1233	-180	20	-180	2.44672	270	61.0649	66.2976	106.79	0	0	0	1.1758	0	0	2.2886	0.93489	0	0	2.4467	0	3.2078	0.3517	0	2.2345	1.5727	-0.88244	2.2456	1.5401	0.90484	-1.0151	2.5264	0.36947	0.7458	2.9041	0.63702	0.12084	2.5859	-1.0686
1234	-180	20	-180	2.44672	116.36	48.5842	53.865	108.746	0	0	0	1.178	0	0	1.8994	1.332	0	-1.0864	-2.1923	0	2.9679	1.1326	0	1.6131	1.8895	-0.89237	1.6131	1.8892	0.89257	-0.26793	-2.7979	0.36478	-1.8644	-1.8958	0.68905	-1.3112	-2.2053	-1.0575
1235	-180	20	-180	2.44672	243.64	45.6681	48.1771	107.513	0	0	0	1.1758	0	0	2.0211	1.2274	0	-1.0864	2.1923	0	3.0679	0.93299	0	1.7797	1.81	-0.89005	1.7832	1.8055	0.89365	-2.0017	1.7518	0.36968	-0.54721	2.8492	0.67213	-1.0424	2.4204	-1.058
1236	-180	100	-180	1.8	180	78.0584	77.9709	113.544	0	0	0	1.226	0	0	1.885	1.3967	0	-1.8	0	0	2.9687	1.2657	0	1.5696	1.9494	-0.8897	1.5704	1.9415	0.89453	-2.005	0.18467	1.0473	-2.1236	0.79858	-0.65867	-2.0109	-1.0027	-0.34284
1237	-180	100	-180	1.8	90	27.3489	27.3019	101.601	0	0	0	1.2422	0	0	1.8012	1.3882	0	0	-1.8	0	2.8881	1.3175	0	1.4679	1.926	-0.89105	1.467	1.9338	0.88632	-0.18294	-2.0718	1.0375	-0.81347	-2.1511	-0.63697	0.9838	-2.0553	-0.35905
1238	-180	100	-180	1.8	270	55.312	55.2975	109.662	0	0	0	1.244	0	0	2.3645	0.93041	0	0	1.8	0	3.258	0.30827	0	2.4035	1.544	-0.90533	2.3685	1.5927	0.87023	0.18263	2.068	1.0358	0.69554	2.1465	-0.74122	-0.99766	2.1736	-0.25092
1239	-180	100	-180	1.8	116.36	16.72	16.655	89.5888	0	0	0	1.214	0	0	1.7754	1.3779	0	-0.79923	-1.6128	0	2.8615	1.3019	0	1.4381	1.9137	-0.88968	1.4373	1.9169	0.8876	-1.0772	-1.7607	1.04	-1.6519	-1.454	-0.65172	-0.08271	-2.3452	-0.36401
1240	-180	100	-180	1.8	243.64	19.17	19.1125	95.8898	0	0	0	1.2148	0	0	2.0295	1.2289	0	-0.79923	1.6128	0	3.0778	0.93745	0	1.826	1.8216	-0.89554	1.8105	1.8327	0.88473	-0.77016	1.9633	1.0302	-0.30938	2.2921	-0.69195	-1.8094	1.3645	-0.30769
1241	-180	100	-180	1.8	96.8508	19.4292	19.3754	95.7109	0	0	0	1.2312	0	0	1.7955	1.381	0	-0.21471	-1.7871	0	2.8818	1.3048	0	1.4636	1.9199	-0.89057	1.4626	1.9263	0.88655	-0.42896	-2.0386	1.0363	-1.0525	-2.0201	-0.65464	0.74213	-2.1515	-0.34848
1242	-180	100	-180	1.8	145.558	42.619	42.5516	100.013	0	0	0	1.2087	0	0	1.7538	1.3895	0	-1.4845	-1.018	0	2.8414	1.3251	0	1.4034	1.9119	-0.89195	1.4	1.9197	0.88641	-1.7396	-0.96781	1.0533	-2.0667	-0.36115	-0.6305	-1.3817	-2.0386	-0.36941
1243	-180	100	-180	1.8	214.442	37.072	36.9973	99.932	0	0	0	1.2073	0	0	1.9577	1.3155	0	-1.4845	1.018	0	3.0255	1.1039	0	1.6927	1.8941	-0.88867	1.6926	1.8848	0.89441	-1.6067	1.3234	1.0362	-1.4534	1.8685	-0.68049	-2.1518	0.22647	-0.30779
1244	-180	100	-180	1.8	263.149	38.6577	38.6395	102.993	0	0	0	1.2331	0	0	2.2627	1.032	0	-0.21471	1.7871	0	3.2148	0.50454	0	2.2303	1.6446	-0.9051	2.1954	1.6865	0.87296	-0.06765	2.0906	1.0334	0.45581	2.2267	-0.72005	-1.2488	1.9983	-0.27462
1245	-180	100	-180	1.1	180	111.971	112.049	145.933	0	0	0	1.2254	0	0	1.8284	1.382	0	-1.1	0	0	2.9124	1.2767	0	1.51	1.9402	-0.88642	1.5135	1.9299	0.89423	-1.5048	0.18121	1.0277	-1.6854	0.86399	-0.51945	-1.717	-0.94263	-0.2948
1246	-180	100	-180	1.1	90	138.343	138.453	214.066	0	0	0	1.3626	0	0	1.9411	1.3632	0	0	-1.1	0	3.0273	1.2674	0	1.6332	1.9131	-0.89522	1.6287	1.9399	0.87809	-0.18123	-1.5511	1.0278	-0.96567	-1.5378	-0.43338	0.76736	-1.7798	-0.39604
1247	-180	100	-180	1.1	270	165.09	165.204	211.18	0	0	0	1.4149	0	0	2.285	1.1067	0	0	1.1	0	3.2983	0.71182	0	2.1361	1.7741	-0.87392	2.1076	1.7789	0.86648	0.17019	1.668	0.96519	0.45926	1.758	-0.78248	-1.0818	1.5163	-0.11322
1248	-180	100	-180	1.1	116.36	85.6274	85.7497	156.948	0	0	0	1.2632	0	0	1.8372	1.3492	0	-0.48842	-0.98562	0	2.9234	1.2633	0	1.5183	1.8969	-0.89236	1.5162	1.9168	0.8799	-0.84184	-1.2938	1.0198	-1.4574	-1.0521	-0.54604	0.11782	-1.8817	-0.30145
1249	-180	100	-180	1.1	243.64	98.5174	98.6374	172.213	0	0	0	1.2858	0	0	2.0015	1.274	0	-0.48842	0.98562	0	3.061	1.0304	0	1.7822	1.899	-0.87925	1.7618	1.8875	0.88217	-0.53747	1.4851	1.0085	-0.081566	1.8215	-0.62326	-1.5778	0.98686	-0.24688
1250	-180	100	-180	1.1	96.8508	115.649	115.803	197.207	0	0	0	1.3241	0	0	1.9023	1.3574	0	-0.13121	-1.0921	0	2.9884	1.2645	0	1.592	1.9051	-0.8956	1.5887	1.9347	0.87697	-0.36379	-1.5111	1.0261	-1.0929	-1.4416	-0.47849	0.63138	-1.8067	-0.34968
1251	-180	100	-180	1.1	145.558	94.5635	94.663	140.357	0	0	0	1.233	0	0	1.8045	1.358	0	-0.90717	-0.62212	0	2.891	1.275	0	1.4759	1.9033	-0.89005	1.475	1.9115	0.88511	-1.3491	-0.70657	1.0226	-1.8064	-0.23475	-0.55187	-0.84342	-1.7457	-0.28971
1252	-180	100	-180	1.1	214.442	97.6211	97.7199	149.34	0	0	0	1.2387	0	0	1.8509	1.3779	0	-0.90717	0.62212	0	2.9314	1.2548	0	1.5477	1.9613	-0.87734	1.5548	1.9371	0.89573	-1.1567	1.0119	1.023	-0.88513	1.6444	-0.54189	-1.8854	0.16561	-0.30942
1253	-180	100	-180	1.1	263.149	139.418	139.581	200.475	0	0	0	1.3644	0	0	2.1992	1.1524	0	-0.13121	1.0921	0	3.2243	0.78964	0	2.0442	1.808	-0.87751	2.0113	1.8099	0.87039	-0.022832	1.6408	0.98141	0.33926	1.7855	-0.73492	-1.2206	1.4026	-0.15309
1254	-180	100	-180	2.5	180	58.4625	89.1046	99.4606	0	0	0	1.1707	0	0	1.993	1.2828	0	-2.5	0	0	3.0437	1.0064	0	1.7433	1.8544	-0.89403	1.7432	1.8542	0.8941	-2.466	0.18743	1.063	-2.576	0.82788	-0.68991	-2.3875	-1.0059	-0.37251
1255	-180	100	-180	2.5	90	51.8204	59.3115	110.99	0	0	0	1.1818	0	0	1.8972	1.3407	0	0	-2.5	0	2.9667	1.1459	0	1.6101	1.8961	-0.89343	1.6101	1.8991	0.89166	-0.18689	-2.6091	1.0599	-0.75618	-2.8532	-0.68952	1.0179	-2.4001	-0.34127
1256	-180	100	-180	2.5	270	60.3299	66.7283	105.732	0	0	0	1.1747	0	0	2.2764	0.95184	0	0	2.5	0	3.2042	0.38247	0	2.2204	1.5603	-0.90184	2.2136	1.5848	0.88502	0.1865	2.6497	1.0577	0.68748	2.9651	-0.69497	-1.0439	2.5337	-0.28594
1257	-180	100	-180	2.5	116.36	49.1658	56.0573	108.036	0	0	0	1.1764	0	0	1.9114	1.3262	0	-1.11	-2.24	0	2.9778	1.1166	0	1.6297	1.8853	-0.89278	1.6297	1.8856	0.89261	-1.3206	-2.2438	1.0602	-1.8861	-1.9287	-0.6844	-0.28368	-2.8297	-0.37212
1258	-180	100	-180	2.5	243.64	46.4678	50.1227	107.114	0	0	0	1.1746	0	0	2.018	1.2324	0	-1.11	2.24	0	3.0653	0.93978	0	1.7779	1.8098	-0.89334	1.7752	1.8135	0.89043	-1.0244	2.4848	1.0514	-0.59066	2.8742	-0.70807	-2.0266	1.7704	-0.32724
1259	-180	100	-180	2.5	96.8508	49.8809	56.6219	109.558	0	0	0	1.1804	0	0	1.901	1.3359	0	-0.29821	-2.4822	0	2.9697	1.1369	0	1.6156	1.8928	-0.89305	1.6155	1.8945	0.89201	-0.49884	-2.5891	1.0573	-1.1051	-2.6575	-0.69884	0.72226	-2.5527	-0.34535
1260	-180	100	-180	2.5	145.558	54.4065	68.1063	107.165	0	0	0	1.1721	0	0	1.9426	1.3083	0	-2.0618	-1.4139	0	3.0033	1.0722	0	1.6724	1.871	-0.89381	1.6723	1.8726	0.89285	-2.121	-1.2274	1.0623	-2.4009	-0.65477	-0.68774	-1.9157	-2.4265	-0.35188
1261	-180	100	-180	2.5	214.442	51.5552	60.4083	107.335	0	0	0	1.1736	0	0	1.9902	1.2771	0	-2.0618	1.4139	0	3.0431	1.0074	0	1.7375	1.8503	-0.89256	1.7379	1.8487	0.89364	-2.0465	1.63	1.0596	-1.9814	2.237	-0.6985	-2.4899	0.48218	-0.33498
1262	-180	100	-180	2.5	263.149	53.5519	58.0809	106.265	0	0	0	1.1749	0	0	2.1847	1.0602	0	-0.29821	2.4822	0	3.1676	0.59345	0	2.0573	1.6614	-0.89977	2.0485	1.681	0.88576	-0.13416	2.6751	1.0543	0.35944	2.9787	-0.70231	-1.3346	2.3981	-0.3002
1263	-180	100	-180	1.30503	180	52.2654	52.3003	88.0292	0	0	0	1.2217	0	0	1.8413	1.3901	0	-1.305	0	0	2.9258	1.28	0	1.5191	1.9414	-0.88842	1.5206	1.933	0.89393	-1.6426	0.18216	1.0331	-1.787	0.82304	-0.57782	-1.8076	-0.9483	-0.31041
1264	-180	100	-180	1.30503	90	44.7668	44.8436	122.431	0	0	0	1.2998	0	0	1.8776	1.3687	0	0	-1.305	0	2.9641	1.284	0	1.5569	1.9152	-0.89172	1.555	1.93	0.88268	-0.17982	-1.6973	1.0198	-0.90821	-1.6986	-0.51568	0.83576	-1.8597	-0.41087
1265	-180	100	-180	1.30503	270	75.7533	75.8538	127.658	0	0	0	1.3315	0	0	2.3267	1.0396	0	0	1.305	0	3.2884	0.53018	0	2.2768	1.6858	-0.88972	2.2443	1.7123	0.86722	0.17409	1.7635	0.98732	0.52537	1.855	-0.78215	-1.045	1.6959	-0.15803
1266	-180	100	-180	1.30503	116.36	8.85697	8.92505	83.1559	0	0	0	1.2412	0	0	1.8069	1.358	0	-0.57945	-1.1693	0	2.8936	1.2825	0	1.477	1.8998	-0.89069	1.4748	1.9121	0.88272	-0.906	-1.4224	1.0222	-1.4972	-1.1603	-0.59952	0.065937	-2.0018	-0.32791
1267	-180	100	-180	1.30503	243.64	20.0701	20.1367	97.2741	0	0	0	1.2565	0	0	2.0193	1.2632	0	-0.57945	1.1693	0	3.0713	0.9876	0	1.8238	1.8764	-0.88848	1.8002	1.8786	0.88129	-0.59868	1.6103	1.0128	-0.14116	1.9358	-0.65454	-1.638	1.0863	-0.27543
1268	-180	100	-180	1.30503	96.8508	26.8917	26.9647	109.122	0	0	0	1.2782	0	0	1.8538	1.3622	0	-0.15567	-1.2957	0	2.9402	1.2789	0	1.5327	1.907	-0.89243	1.5304	1.9249	0.88123	-0.38041	-1.6572	1.0209	-1.0646	-1.5952	-0.55483	0.67175	-1.8993	-0.36602
1269	-180	100	-180	1.30503	145.558	28.686	28.728	78.7249	0	0	0	1.225	0	0	1.7837	1.3704	0	-1.0763	-0.73808	0	2.8714	1.3005	0	1.4425	1.9035	-0.89127	1.4393	1.9136	0.88442	-1.4589	-0.78009	1.0309	-1.8725	-0.27259	-0.59349	-0.98541	-1.8091	-0.31733
1270	-180	100	-180	1.30503	214.442	30.2281	30.2713	86.0781	0	0	0	1.2274	0	0	1.8855	1.3706	0	-1.0763	0.73808	0	2.9636	1.2226	0	1.5969	1.9511	-0.88257	1.598	1.9304	0.89618	-1.278	1.0956	1.0252	-1.0444	1.6817	-0.59665	-1.9603	0.17225	-0.31497
1271	-180	100	-180	1.30503	263.149	52.5546	52.6465	116.867	0	0	0	1.3049	0	0	2.2348	1.1113	0	-0.15567	1.2957	0	3.2262	0.66284	0	2.1519	1.7503	-0.89094	2.1149	1.7722	0.87004	-0.033388	1.7515	0.99688	0.37607	1.8927	-0.74087	-1.2184	1.5662	-0.19612
1272	-180	100	-180	2.29497	180	64.4655	89.6748	105.509	0	0	0	1.1724	0	0	2.001	1.2799	0	-2.295	0	0	3.0506	0.99895	0	1.7542	1.8533	-0.8937	1.7541	1.852	0.8945	-2.3125	0.18753	1.0636	-2.5216	0.80454	-0.68565	-2.2296	-1.013	-0.36338
1273	-180	100	-180	2.29497	90	49.7334	51.1474	114.368	0	0	0	1.1953	0	0	1.8412	1.371	0	0	-2.295	0	2.9195	1.2284	0	1.5318	1.9166	-0.89268	1.5316	1.9207	0.89017	-0.18557	-2.4714	1.0524	-0.75513	-2.6564	-0.68907	1.0259	-2.2794	-0.33236
1274	-180	100	-180	2.29497	270	62.1918	63.9533	110.154	0	0	0	1.1816	0	0	2.3202	0.8954	0	0	2.295	0	3.2167	0.27815	0	2.3117	1.499	-0.90737	2.2937	1.54	0.87903	0.18581	2.4767	1.0538	0.73235	2.6632	-0.70379	-1.0227	2.5213	-0.28495
1275	-180	100	-180	2.29497	116.36	45.6367	46.9543	109.672	0	0	0	1.1841	0	0	1.8557	1.3522	0	-1.019	-2.0563	0	2.9308	1.1901	0	1.5522	1.9018	-0.89185	1.5521	1.9024	0.89147	-1.2537	-2.111	1.0549	-1.8215	-1.7928	-0.67551	-0.23306	-2.7007	-0.37275
1276	-180	100	-180	2.29497	243.64	42.0896	42.2528	107.786	0	0	0	1.1808	0	0	2.0264	1.2161	0	-1.019	2.0563	0	3.0732	0.9209	0	1.7925	1.7963	-0.89392	1.7874	1.8017	0.88927	-0.95829	2.3479	1.0427	-0.51482	2.706	-0.7068	-1.9754	1.664	-0.31927
1277	-180	100	-180	2.29497	96.8508	46.4478	47.5234	111.706	0	0	0	1.1918	0	0	1.8456	1.3641	0	-0.27376	-2.2786	0	2.9229	1.2153	0	1.5384	1.9116	-0.8922	1.5381	1.9141	0.89065	-0.47988	-2.4415	1.0505	-1.0786	-2.4839	-0.69525	0.74099	-2.4309	-0.3385
1278	-180	100	-180	2.29497	145.558	55.8916	62.8324	112.133	0	0	0	1.1764	0	0	1.8995	1.3296	0	-1.8927	-1.298	0	2.968	1.1302	0	1.6114	1.8841	-0.89354	1.6109	1.887	0.89169	-2.0104	-1.1511	1.0647	-2.2967	-0.54962	-0.66484	-1.7876	-2.3125	-0.36508
1279	-180	100	-180	2.29497	214.442	51.2985	54.5735	110.653	0	0	0	1.1784	0	0	1.9922	1.275	0	-1.8927	1.298	0	3.0463	1.009	0	1.7399	1.8504	-0.8918	1.7403	1.8475	0.89369	-1.9297	1.5485	1.0528	-1.8448	2.1211	-0.70353	-2.3852	0.39153	-0.31689
1280	-180	100	-180	2.29497	263.149	52.557	53.2182	108.89	0	0	0	1.1821	0	0	2.2183	1.0182	0	-0.27376	2.2786	0	3.1838	0.51631	0	2.1253	1.6197	-0.90426	2.1072	1.6508	0.88152	-0.11619	2.5157	1.0476	0.41084	2.7305	-0.70559	-1.3146	2.3382	-0.29806
1281	-180	100	-180	1.15328	180	86.1277	86.1928	120.783	0	0	0	1.2236	0	0	1.8326	1.3844	0	-1.1533	0	0	2.9167	1.277	0	1.5133	1.9408	-0.88691	1.5161	1.9305	0.89437	-1.5361	0.18172	1.0306	-1.7099	0.84784	-0.53634	-1.7392	-0.94239	-0.29676
1282	-180	100	-180	1.15328	90	102.642	102.739	179.243	0	0	0	1.3402	0	0	1.9206	1.3644	0	0	-1.1533	0	3.0067	1.2712	0	1.6088	1.9137	-0.89378	1.6052	1.9359	0.8798	-0.18045	-1.5877	1.0234	-0.94823	-1.5773	-0.4586	0.78314	-1.8002	-0.40517
1283	-180	100	-180	1.15328	270	130.956	131.067	179.192	0	0	0	1.3829	0	0	2.2978	1.0838	0	0	1.1533	0	3.2945	0.64808	0	2.1834	1.7447	-0.87952	2.1536	1.7571	0.86663	0.1712	1.6879	0.97089	0.47362	1.7794	-0.78451	-1.0694	1.5635	-0.12474
1284	-180	100	-180	1.15328	116.36	54.2308	54.3262	126.867	0	0	0	1.2556	0	0	1.828	1.3513	0	-0.51208	-1.0334	0	2.9143	1.2682	0	1.5059	1.8972	-0.89184	1.5037	1.9148	0.88072	-0.85744	-1.3253	1.0199	-1.4648	-1.0793	-0.56317	0.10503	-1.9108	-0.30911
1285	-180	100	-180	1.15328	243.64	66.8419	66.9346	141.83	0	0	0	1.2759	0	0	2.0074	1.2712	0	-0.51208	1.0334	0	3.0643	1.0159	0	1.7973	1.8929	-0.88224	1.7751	1.8857	0.88175	-0.55211	1.515	1.0094	-0.09663	1.8483	-0.63255	-1.5917	1.0117	-0.25564
1286	-180	100	-180	1.53212	180	54.081	54.0551	90.0061	0	0	0	1.2239	0	0	1.8513	1.396	0	-1.5321	0	0	2.9365	1.2847	0	1.5267	1.943	-0.88987	1.5272	1.9375	0.8932	-1.8101	0.183	1.0378	-1.918	0.81112	-0.6234	-1.917	-0.9686	-0.33073
1287	-180	100	-180	1.53212	90	21.2142	21.2284	98.1414	0	0	0	1.2684	0	0	1.8341	1.3776	0	0	-1.5321	0	2.9211	1.3048	0	1.5046	1.9192	-0.89103	1.5035	1.9299	0.88459	-0.18103	-1.8654	1.0267	-0.85916	-1.8975	-0.58217	0.9156	-1.9497	-0.38845
1288	-180	100	-180	1.53212	270	53.0305	53.0739	106.943	0	0	0	1.2894	0	0	2.3528	0.99309	0	0	1.5321	0	3.2788	0.42068	0	2.3585	1.6227	-0.89866	2.3231	1.6624	0.8681	0.17841	1.8963	1.0118	0.6092	1.9831	-0.76694	-1.0217	1.9033	-0.20487
1289	-180	100	-180	1.53212	116.36	0.36083	0.358207	74.6371	0	0	0	1.2285	0	0	1.7845	1.3689	0	-0.68029	-1.3728	0	2.8716	1.3005	0	1.4474	1.9064	-0.88969	1.4457	1.9133	0.88519	-0.98333	-1.5754	1.0297	-1.5633	-1.2894	-0.63133	0.00077765	-2.1533	-0.34878
1290	-180	100	-180	1.53212	243.64	8.12363	8.12501	86.3889	0	0	0	1.2372	0	0	2.0272	1.2489	0	-0.68029	1.3728	0	3.0767	0.96208	0	1.8346	1.8514	-0.89365	1.8134	1.8611	0.88215	-0.67462	1.7667	1.0207	-0.21302	2.0884	-0.67666	-1.7153	1.2085	-0.29463
1291	-180	100	-180	2.06788	180	75.1436	89.0413	116.741	0	0	0	1.1796	0	0	2.0125	1.2829	0	-2.0679	0	0	3.0621	1.0004	0	1.7686	1.8639	-0.89015	1.7678	1.8512	0.89779	-2.075	0.18797	1.066	-2.6789	0.67231	-0.59961	-2.0049	-1.0261	-0.32703
1292	-180	100	-180	2.06788	90	40.7731	40.6791	110.735	0	0	0	1.2171	0	0	1.7972	1.3911	0	0	-2.0679	0	2.8819	1.2996	0	1.4686	1.9287	-0.89171	1.4679	1.9344	0.88819	-0.18426	-2.2941	1.045	-0.77226	-2.4287	-0.67411	1.0203	-2.1629	-0.33659
1293	-180	100	-180	2.06788	270	60.5895	60.5322	112.334	0	0	0	1.2024	0	0	2.3573	0.87475	0	0	2.0679	0	3.2329	0.22787	0	2.3929	1.4774	-0.90918	2.3643	1.528	0.87416	0.18493	2.2766	1.0488	0.74892	2.3623	-0.7143	-0.98389	2.4396	-0.28205
1294	-180	100	-180	2.06788	116.36	34.7258	34.624	103.95	0	0	0	1.1975	0	0	1.7952	1.3755	0	-0.91817	-1.8529	0	2.878	1.269	0	1.4679	1.9144	-0.8906	1.4675	1.9157	0.88973	-1.1745	-1.9539	1.0481	-1.745	-1.6354	-0.66461	-0.16985	-2.5442	-0.37137
1295	-180	100	-180	2.06788	243.64	32.5177	32.4239	104.025	0	0	0	1.1938	0	0	2.0295	1.2148	0	-0.91817	1.8529	0	3.0768	0.92022	0	1.8087	1.7998	-0.89494	1.7994	1.808	0.88754	-0.87264	2.1727	1.0369	-0.42	2.5143	-0.70141	-1.9024	1.5281	-0.31457
1296	-180	100	-180	2.44672	180	59.7123	89.4038	100.664	0	0	0	1.171	0	0	1.9945	1.2821	0	-2.4467	0	0	3.045	1.0048	0	1.7454	1.854	-0.89401	1.7453	1.8537	0.89414	-2.4229	0.18747	1.0632	-2.5377	0.8261	-0.69015	-2.348	-1.0076	-0.37137
1297	-180	100	-180	2.44672	90	51.5846	57.3188	112.138	0	0	0	1.1845	0	0	1.884	1.3481	0	0	-2.4467	0	2.9557	1.1653	0	1.5917	1.9013	-0.89327	1.5916	1.9046	0.89133	-0.18659	-2.5745	1.0582	-0.75539	-2.8016	-0.69011	1.0209	-2.3688	-0.3382
1298	-180	100	-180	2.44672	270	60.9156	66.0419	106.849	0	0	0	1.1759	0	0	2.2877	0.9362	0	0	2.4467	0	3.2077	0.35429	0	2.2433	1.5435	-0.90331	2.2339	1.5722	0.88357	0.18632	2.6058	1.0567	0.69837	2.8909	-0.69727	-1.042	2.5273	-0.2857
1299	-180	100	-180	2.44672	116.36	48.5847	53.866	108.746	0	0	0	1.178	0	0	1.8994	1.332	0	-1.0864	-2.1923	0	2.9679	1.1326	0	1.6131	1.8892	-0.89258	1.6131	1.8895	0.89237	-1.3032	-2.2093	1.0591	-1.8694	-1.8937	-0.68241	-0.27013	-2.7962	-0.37234
1300	-180	100	-180	2.44672	243.64	45.6608	48.1666	107.529	0	0	0	1.1758	0	0	2.0206	1.2279	0	-1.0864	2.1923	0	3.0676	0.93391	0	1.7823	1.806	-0.89347	1.779	1.8101	0.89016	-1.0071	2.449	1.0494	-0.57026	2.8298	-0.70792	-2.0143	1.7433	-0.32515
1301	-180	140	-180	1.8	180	78.0588	77.9714	113.545	0	0	0	1.2259	0	0	1.8856	1.3966	0	-1.8	0	0	2.9693	1.2651	0	1.5714	1.9414	-0.8946	1.5705	1.9495	0.88963	-2.1263	0.79232	0.66484	-2.0076	0.1761	-1.0481	-2.006	-1.0037	0.3436
1302	-180	140	-180	1.8	90	27.3895	27.3424	101.665	0	0	0	1.2422	0	0	1.8008	1.3884	0	0	-1.8	0	2.8878	1.3181	0	1.4666	1.9338	-0.88642	1.4673	1.9263	0.89095	-0.79081	-2.1527	0.66357	-0.18973	-2.0785	-1.0344	0.99208	-2.0486	0.34126
1303	-180	140	-180	1.8	270	55.8323	55.8142	109.744	0	0	0	1.2429	0	0	2.3774	0.91186	0	0	1.8	0	3.2612	0.27584	0	2.3923	1.5729	-0.87136	2.4283	1.5244	0.90626	0.77701	2.1495	0.65199	0.20322	2.0395	-1.0411	-0.97129	2.2151	0.27689
1304	-180	140	-180	1.8	116.36	16.6873	16.6226	89.6945	0	0	0	1.214	0	0	1.7755	1.3779	0	-0.79923	-1.6128	0	2.8616	1.3019	0	1.4374	1.9168	-0.88765	1.4382	1.9139	0.88963	-1.6308	-1.4634	0.68089	-1.1191	-1.7358	-1.0312	-0.073371	-2.3545	0.32389
1305	-180	140	-180	1.8	243.64	19.2274	19.1719	95.9011	0	0	0	1.2148	0	0	2.0322	1.2272	0	-0.79923	1.6128	0	3.0796	0.93247	0	1.815	1.8316	-0.88468	1.8314	1.8201	0.89599	-0.27922	2.31	0.65071	-0.79594	1.9397	-1.0385	-1.7997	1.377	0.34617
1306	-180	140	-180	1.8	96.8508	19.4339	19.3802	95.7155	0	0	0	1.2313	0	0	1.7955	1.381	0	-0.21471	-1.7871	0	2.8818	1.3048	0	1.4626	1.9262	-0.88657	1.4635	1.92	0.89053	-1.0428	-2.0209	0.66646	-0.43931	-2.0388	-1.0339	0.74635	-2.1506	0.33698
1307	-180	140	-180	1.8	145.558	42.4382	42.3706	100.363	0	0	0	1.2086	0	0	1.7538	1.3894	0	-1.4845	-1.018	0	2.8413	1.3248	0	1.4004	1.9192	-0.8868	1.4033	1.9124	0.89158	-2.0414	-0.40063	0.69156	-1.785	-0.8723	-1.0322	-1.3827	-2.0647	0.28681
1308	-180	140	-180	1.8	214.442	36.9185	36.8453	100.217	0	0	0	1.2072	0	0	1.9578	1.3146	0	-1.4845	1.018	0	3.0255	1.1026	0	1.6926	1.8836	-0.89452	1.693	1.8935	0.8885	-1.4533	1.9068	0.62985	-1.6498	1.2373	-1.0515	-2.132	0.24115	0.38127
1309	-180	140	-180	1.8	263.149	38.9354	38.9177	103.041	0	0	0	1.2325	0	0	2.2725	1.0218	0	-0.21471	1.7871	0	3.2185	0.48355	0	2.2134	1.6763	-0.87369	2.2489	1.6344	0.9058	0.51675	2.2315	0.65386	-0.053853	2.0693	-1.0387	-1.2326	2.0326	0.29865
1310	-180	140	-180	1.1	180	112.16	112.238	145.5	0	0	0	1.2256	0	0	1.8265	1.3826	0	-1.1	0	0	2.9108	1.2802	0	1.5095	1.9295	-0.89414	1.5064	1.9403	0.88631	-1.6528	0.77866	0.65337	-1.5302	0.35106	-0.97733	-1.7294	-0.96712	0.17864
1311	-180	140	-180	1.1	90	136.187	136.286	217.029	0	0	0	1.3699	0	0	1.9402	1.3693	0	0	-1.1	0	3.027	1.2774	0	1.6286	1.9363	-0.88414	1.6303	1.9265	0.89038	-0.81901	-1.5245	0.68723	-0.58896	-1.5182	-0.89378	0.83174	-1.8032	0.10853
1312	-180	140	-180	1.1	270	168.443	168.578	213.864	0	0	0	1.4167	0	0	2.3257	1.0804	0	0	1.1	0	3.3203	0.63898	0	2.1873	1.7419	-0.88011	2.2217	1.7556	0.87219	0.63718	1.8336	0.53466	0.028395	1.5979	-1.0296	-1.0441	1.5381	0.2438
1313	-180	140	-180	1.1	116.36	84.6063	84.729	158.418	0	0	0	1.2637	0	0	1.8367	1.3499	0	-0.48842	-0.98562	0	2.9229	1.2648	0	1.5159	1.9136	-0.88238	1.5174	1.9014	0.89002	-1.3938	-1.062	0.65223	-1.0418	-1.189	-0.95719	0.12854	-1.905	0.16462
1314	-180	140	-180	1.1	243.64	98.4599	98.581	172.178	0	0	0	1.2865	0	0	2.0004	1.2729	0	-0.48842	0.98562	0	3.0603	1.0317	0	1.76	1.8867	-0.88241	1.7779	1.8988	0.87851	-0.07449	1.8207	0.62233	-0.49205	1.5064	-1.0006	-1.5804	0.99609	0.22527
1315	-180	140	-180	1.1	96.8508	113.843	113.993	199.76	0	0	0	1.3272	0	0	1.9013	1.3607	0	-0.13121	-1.0921	0	2.9877	1.2698	0	1.5882	1.9292	-0.88249	1.5898	1.9159	0.89083	-0.97904	-1.4378	0.67174	-0.69481	-1.454	-0.92092	0.67358	-1.8282	0.12846
1316	-180	140	-180	1.1	145.558	94.0992	94.2001	140.907	0	0	0	1.2334	0	0	1.8035	1.3583	0	-0.90717	-0.62212	0	2.89	1.2767	0	1.4735	1.9106	-0.88577	1.4743	1.9048	0.88926	-1.7548	-0.26748	0.64769	-1.4593	-0.55854	-0.97129	-0.85016	-1.7661	0.1774
1317	-180	140	-180	1.1	214.442	97.9418	98.057	148.854	0	0	0	1.2391	0	0	1.844	1.3798	0	-0.90717	0.62212	0	2.9257	1.2675	0	1.5402	1.938	-0.89424	1.5346	1.9593	0.87829	-0.91406	1.5713	0.65359	-1.1057	1.1183	-0.99106	-1.9024	0.14559	0.21738
1318	-180	140	-180	1.1	263.149	141.038	141.207	201.057	0	0	0	1.3659	0	0	2.2258	1.1354	0	-0.13121	1.0921	0	3.2405	0.74314	0	2.063	1.7871	-0.87957	2.0972	1.7992	0.87516	0.46008	1.8383	0.5673	-0.085995	1.5922	-1.0201	-1.1931	1.427	0.23389
1319	-180	140	-180	2.5	180	58.4627	89.1069	99.4608	0	0	0	1.1707	0	0	1.993	1.2828	0	-2.5	0	0	3.0437	1.0064	0	1.7432	1.8542	-0.8941	1.7433	1.8544	0.89403	-2.5755	0.82556	0.69272	-2.4669	0.19025	-1.0625	-2.3875	-1.0071	0.36942
1320	-180	140	-180	2.5	90	51.795	59.2473	111.011	0	0	0	1.1817	0	0	1.8978	1.3402	0	0	-2.5	0	2.9672	1.1448	0	1.6109	1.8988	-0.89162	1.6109	1.8957	0.89347	-0.77971	-2.8688	0.65425	-0.13409	-2.6024	-1.0684	1.0011	-2.3956	0.3869
1321	-180	140	-180	2.5	270	60.4276	66.9406	105.646	0	0	0	1.1746	0	0	2.2774	0.95067	0	0	2.5	0	3.2043	0.37988	0	2.216	1.5836	-0.88516	2.2218	1.5586	0.9023	0.73786	2.9938	0.61914	0.13152	2.5913	-1.0726	-1.0245	2.5575	0.34511
1322	-180	140	-180	2.5	116.36	49.1651	56.0561	108.035	0	0	0	1.1764	0	0	1.9114	1.3262	0	-1.11	-2.24	0	2.9778	1.1166	0	1.6297	1.8856	-0.89261	1.6297	1.8853	0.89278	-1.8796	-1.9322	0.69327	-1.3311	-2.2378	-1.0581	-0.28043	-2.8321	0.36093
1323	-180	140	-180	2.5	243.64	46.4747	50.1341	107.074	0	0	0	1.1746	0	0	2.0185	1.2319	0	-1.11	2.24	0	3.0656	0.93882	0	1.7759	1.8133	-0.89033	1.7788	1.8093	0.89352	-0.5609	2.9012	0.6592	-1.0706	2.4446	-1.0626	-2.0104	1.7827	0.38465
1324	-180	140	-180	2.5	96.8508	49.8787	56.6202	109.556	0	0	0	1.1803	0	0	1.9011	1.3358	0	-0.29821	-2.4822	0	2.9698	1.1368	0	1.6156	1.8945	-0.89198	1.6157	1.8927	0.89308	-1.1267	-2.6604	0.67237	-0.46388	-2.5869	-1.0635	0.71078	-2.5526	0.3777
1325	-180	140	-180	2.5	145.558	54.4061	68.0976	107.188	0	0	0	1.1721	0	0	1.9425	1.3083	0	-2.0618	-1.4139	0	3.0032	1.0723	0	1.6722	1.8726	-0.89286	1.6723	1.8711	0.8938	-2.4031	-0.65508	0.68712	-2.1263	-1.2262	-1.0618	-1.9143	-2.4265	0.35117
1326	-180	140	-180	2.5	214.442	51.5213	60.3246	107.393	0	0	0	1.1735	0	0	1.9899	1.2771	0	-2.0618	1.4139	0	3.0428	1.0076	0	1.7373	1.8486	-0.8936	1.7369	1.8502	0.89254	-1.9852	2.2846	0.63886	-2.0761	1.5528	-1.0724	-2.4717	0.50317	0.40814
1327	-180	140	-180	2.5	263.149	53.6296	58.2112	106.204	0	0	0	1.1748	0	0	2.1863	1.0586	0	-0.29821	2.4822	0	3.1683	0.58981	0	2.0516	1.6799	-0.88569	2.0602	1.6593	0.90033	0.40506	3.0021	0.63795	-0.18276	2.6286	-1.0682	-1.3173	2.4189	0.35808
1328	-180	140	-180	1.30503	180	52.3426	52.3777	87.8297	0	0	0	1.2217	0	0	1.8406	1.3902	0	-1.305	0	0	2.9252	1.2812	0	1.5192	1.9329	-0.89391	1.5176	1.9414	0.88832	-1.7728	0.77385	0.64934	-1.6536	0.26316	-1.0121	-1.8121	-0.96674	0.24419
1329	-180	140	-180	1.30503	90	44.8054	44.876	123.623	0	0	0	1.3029	0	0	1.8764	1.3726	0	0	-1.305	0	2.9631	1.2906	0	1.5532	1.9309	-0.88416	1.5544	1.9202	0.89068	-0.80083	-1.6943	0.67198	-0.37987	-1.689	-0.97073	0.8946	-1.8692	0.23339
1330	-180	140	-180	1.30503	270	78.3351	78.4447	128.649	0	0	0	1.3335	0	0	2.3557	1.009	0	0	1.305	0	3.303	0.47305	0	2.2912	1.6788	-0.87185	2.3321	1.6572	0.89056	0.69219	1.9061	0.58082	0.092959	1.7136	-1.0271	-1.0029	1.7249	0.27031
1331	-180	140	-180	1.30503	116.36	8.50362	8.57326	83.8403	0	0	0	1.2415	0	0	1.807	1.3582	0	-0.57945	-1.1693	0	2.8937	1.2828	0	1.4752	1.9112	-0.88351	1.4771	1.9012	0.88995	-1.4571	-1.17	0.65962	-1.0182	-1.3589	-0.99413	0.077966	-2.0207	0.23956
1332	-180	140	-180	1.30503	243.64	20.1021	20.1671	97.3292	0	0	0	1.2566	0	0	2.0218	1.2617	0	-0.57945	1.1693	0	3.073	0.98314	0	1.805	1.8773	-0.88173	1.8283	1.8757	0.88843	-0.12311	1.9443	0.63185	-0.59247	1.607	-1.015	-1.6357	1.0953	0.2833
1333	-180	140	-180	1.30503	96.8508	26.6029	26.6709	110.24	0	0	0	1.2796	0	0	1.8536	1.3637	0	-0.15567	-1.2957	0	2.94	1.2814	0	1.5303	1.9239	-0.88278	1.5319	1.9106	0.8911	-0.98899	-1.5969	0.6641	-0.54687	-1.6313	-0.98069	0.70943	-1.911	0.23243
1334	-180	140	-180	1.30503	145.558	28.3495	28.3918	79.2647	0	0	0	1.2252	0	0	1.7831	1.3705	0	-1.0763	-0.73808	0	2.8708	1.3011	0	1.4389	1.9128	-0.88503	1.4416	1.9046	0.89061	-1.836	-0.30255	0.66191	-1.5317	-0.66604	-0.99927	-0.9885	-1.8312	0.22611
1335	-180	140	-180	1.30503	214.442	30.3293	30.3749	85.7642	0	0	0	1.2274	0	0	1.8853	1.3708	0	-1.0763	0.73808	0	2.9636	1.2238	0	1.5966	1.9304	-0.89592	1.5961	1.9508	0.88272	-1.0626	1.6524	0.6392	-1.2816	1.1081	-1.0196	-1.9603	0.15788	0.29232
1336	-180	140	-180	1.30503	263.149	53.7855	53.889	117.152	0	0	0	1.3058	0	0	2.2548	1.0934	0	-0.15567	1.2957	0	3.2372	0.6254	0	2.1486	1.7529	-0.8734	2.1901	1.7349	0.89143	0.48995	1.9299	0.60134	-0.073188	1.7137	-1.0221	-1.1894	1.5951	0.27118
1337	-180	140	-180	2.29497	180	64.4624	89.4506	105.645	0	0	0	1.1725	0	0	2.0011	1.2799	0	-2.295	0	0	3.0507	0.99896	0	1.7542	1.852	-0.89453	1.7543	1.8534	0.89365	-2.5409	0.80656	0.67678	-2.3131	0.17355	-1.0659	-2.2248	-1.0089	0.37394
1338	-180	140	-180	2.29497	90	49.6917	51.0924	114.373	0	0	0	1.1951	0	0	1.8418	1.3704	0	0	-2.295	0	2.92	1.2272	0	1.5325	1.9204	-0.89011	1.5327	1.9161	0.89274	-0.77928	-2.6702	0.65389	-0.12839	-2.4643	-1.0619	1.0094	-2.275	0.37995
1339	-180	140	-180	2.29497	270	62.3192	64.0496	110.051	0	0	0	1.1813	0	0	2.3276	0.88661	0	0	2.295	0	3.2179	0.26037	0	2.3092	1.5306	-0.87961	2.3261	1.49	0.9077	0.77927	2.6581	0.65388	0.18772	2.4334	-1.0604	-1.0051	2.5707	0.30041
1340	-180	140	-180	2.29497	116.36	45.6343	46.9512	109.67	0	0	0	1.1841	0	0	1.8557	1.3522	0	-1.019	-2.0563	0	2.9308	1.1901	0	1.5521	1.9024	-0.89148	1.5522	1.9018	0.89185	-1.8103	-1.7987	0.69089	-1.2723	-2.1002	-1.0512	-0.22752	-2.7049	0.35323
1341	-180	140	-180	2.29497	243.64	42.1103	42.2765	107.76	0	0	0	1.1808	0	0	2.0275	1.2152	0	-1.019	2.0563	0	3.074	0.91872	0	1.789	1.8013	-0.88914	1.7947	1.7953	0.89422	-0.48136	2.7319	0.65593	-1.0049	2.3091	-1.0544	-1.9594	1.6774	0.37743
1342	-180	140	-180	2.29497	96.8508	46.4427	47.5189	111.677	0	0	0	1.1918	0	0	1.8458	1.364	0	-0.27376	-2.2786	0	2.9231	1.215	0	1.5384	1.914	-0.89061	1.5386	1.9114	0.89224	-1.1007	-2.4862	0.66812	-0.44279	-2.4406	-1.0571	0.72932	-2.43	0.37213
1343	-180	140	-180	2.29497	145.558	55.8691	62.7799	112.202	0	0	0	1.1763	0	0	1.8995	1.3296	0	-1.8927	-1.298	0	2.968	1.1301	0	1.6109	1.8869	-0.89176	1.6114	1.8842	0.89347	-2.2876	-0.56911	0.6918	-2.0296	-1.1131	-1.0565	-1.7892	-2.3246	0.32996
1344	-180	140	-180	2.29497	214.442	51.2282	54.4584	110.744	0	0	0	1.1783	0	0	1.9918	1.2748	0	-1.8927	1.298	0	3.046	1.0089	0	1.7397	1.8471	-0.89368	1.7393	1.8501	0.89173	-1.8463	2.1782	0.63112	-1.9664	1.4507	-1.0693	-2.3642	0.41639	0.40722
1345	-180	140	-180	2.29497	263.149	52.6756	53.342	108.801	0	0	0	1.1819	0	0	2.2236	1.0131	0	-0.27376	2.2786	0	3.1857	0.50478	0	2.1176	1.6464	-0.88168	2.1356	1.6145	0.90493	0.45643	2.7359	0.6541	-0.13248	2.483	-1.0571	-1.3016	2.3695	0.33145
1346	-180	140	-180	1.15328	180	86.287	86.3518	120.389	0	0	0	1.2236	0	0	1.8312	1.3848	0	-1.1533	0	0	2.9155	1.2795	0	1.5133	1.9301	-0.89436	1.5106	1.9409	0.88674	-1.6838	0.77426	0.64968	-1.5566	0.31816	-0.99152	-1.7484	-0.96585	0.19783
1347	-180	140	-180	1.15328	90	101.45	101.536	181.626	0	0	0	1.3464	0	0	1.9199	1.3699	0	0	-1.1533	0	3.0065	1.2802	0	1.6047	1.9347	-0.88381	1.6064	1.9238	0.89069	-0.81173	-1.5671	0.68112	-0.52016	-1.5619	-0.92256	0.85041	-1.8203	0.14697
1348	-180	140	-180	1.15328	270	134.135	134.263	181.287	0	0	0	1.3856	0	0	2.335	1.0552	0	0	1.1533	0	3.3144	0.581	0	2.2209	1.7206	-0.87682	2.2582	1.722	0.87856	0.65253	1.8503	0.54754	0.04255	1.6237	-1.0282	-1.0288	1.5865	0.25556
1349	-180	140	-180	1.15328	116.36	53.4601	53.557	128.057	0	0	0	1.2561	0	0	1.8278	1.3518	0	-0.51208	-1.0334	0	2.9141	1.2692	0	1.5037	1.9125	-0.88257	1.5054	1.9006	0.8901	-1.4088	-1.0892	0.6534	-1.0277	-1.2339	-0.97021	0.11692	-1.9331	0.18716
1350	-180	140	-180	1.15328	243.64	66.8226	66.9145	141.811	0	0	0	1.2762	0	0	2.0078	1.27	0	-0.51208	1.0334	0	3.0646	1.0148	0	1.7763	1.8848	-0.88214	1.797	1.8927	0.88178	-0.086611	1.8505	0.62433	-0.52235	1.5266	-1.0056	-1.593	1.02	0.24436
1351	-180	140	-180	1.53212	180	54.1064	54.0806	89.9393	0	0	0	1.2239	0	0	1.8509	1.3961	0	-1.5321	0	0	2.9362	1.2852	0	1.5266	1.9375	-0.89315	1.5261	1.943	0.88987	-1.9125	0.78493	0.65863	-1.8146	0.22027	-1.0293	-1.9182	-0.97969	0.29607
1352	-180	140	-180	1.53212	90	21.4172	21.4309	98.4828	0	0	0	1.2689	0	0	1.8328	1.3791	0	0	-1.5321	0	2.9199	1.3075	0	1.5017	1.9303	-0.88502	1.5026	1.9209	0.89069	-0.79464	-1.8965	0.66679	-0.26137	-1.8705	-1.0082	0.94862	-1.9463	0.30353
1353	-180	140	-180	1.53212	270	54.5225	54.5624	107.235	0	0	0	1.2895	0	0	2.3726	0.96716	0	0	1.5321	0	3.287	0.37616	0	2.3554	1.6357	-0.86974	2.3964	1.5958	0.90045	0.73891	2.007	0.62002	0.15388	1.8602	-1.0322	-0.98593	1.9386	0.27658
1354	-180	140	-180	1.53212	116.36	0.24541	0.243061	74.9367	0	0	0	1.2286	0	0	1.7846	1.369	0	-0.68029	-1.3728	0	2.8717	1.3005	0	1.446	1.913	-0.88541	1.4475	1.9069	0.8895	-1.5356	-1.2991	0.67056	-1.05	-1.5363	-1.015	0.011382	-2.167	0.29082
1355	-180	140	-180	1.53212	243.64	8.18361	8.18387	86.4258	0	0	0	1.2372	0	0	2.0304	1.247	0	-0.68029	1.3728	0	3.0788	0.95644	0	1.8189	1.8598	-0.88234	1.8408	1.8501	0.89394	-0.1872	2.1022	0.64248	-0.68569	1.7524	-1.0265	-1.7092	1.2196	0.31939
1356	-180	140	-180	2.06788	180	75.0212	88.4248	117.471	0	0	0	1.1796	0	0	2.0122	1.2832	0	-2.0679	0	0	3.0619	1.0011	0	1.7673	1.8516	-0.89762	1.768	1.8639	0.89025	-2.707	0.67551	0.56682	-2.0876	0.10121	-1.0777	-1.9808	-1.0026	0.3904
1357	-180	140	-180	2.06788	90	40.7354	40.6414	110.744	0	0	0	1.2169	0	0	1.7975	1.3907	0	0	-2.0679	0	2.8821	1.2988	0	1.4684	1.9342	-0.88814	1.469	1.9284	0.89175	-0.7831	-2.4364	0.6571	-0.14385	-2.2931	-1.0513	1.011	-2.1576	0.36568
1358	-180	140	-180	2.06788	270	60.6832	60.6176	112.335	0	0	0	1.2013	0	0	2.3669	0.86183	0	0	2.0679	0	3.234	0.20338	0	2.3844	1.513	-0.87545	2.4114	1.4648	0.90889	0.79496	2.3525	0.66705	0.22435	2.2467	-1.0478	-0.96313	2.4892	0.27849
1359	-180	140	-180	2.06788	116.36	34.7168	34.615	103.964	0	0	0	1.1975	0	0	1.7952	1.3755	0	-0.91817	-1.8529	0	2.878	1.2691	0	1.4675	1.9157	-0.88975	1.4679	1.9144	0.89059	-1.7286	-1.6438	0.68722	-1.2032	-1.9369	-1.0422	-0.16197	-2.5507	0.342
1360	-180	140	-180	2.06788	243.64	32.5564	32.4656	104.018	0	0	0	1.1937	0	0	2.0314	1.2134	0	-0.91817	1.8529	0	3.078	0.91664	0	1.8023	1.8073	-0.8874	1.8124	1.7984	0.89536	-0.38714	2.5368	0.65405	-0.91186	2.1401	-1.0474	-1.8888	1.5413	0.36544
1361	-180	140	-180	2.44672	180	59.7124	89.4003	100.664	0	0	0	1.171	0	0	1.9945	1.2821	0	-2.4467	0	0	3.045	1.0048	0	1.7453	1.8537	-0.89414	1.7454	1.854	0.89401	-2.5377	0.8246	0.69193	-2.4238	0.18871	-1.063	-2.3478	-1.0082	0.36966
1362	-180	140	-180	2.44672	90	51.5548	57.26	112.154	0	0	0	1.1844	0	0	1.8849	1.3474	0	0	-2.4467	0	2.9564	1.1638	0	1.5928	1.9041	-0.89128	1.5929	1.9007	0.89332	-0.77966	-2.8168	0.65422	-0.13198	-2.5666	-1.0672	1.0038	-2.3649	0.38554
1363	-180	140	-180	2.44672	270	61.0339	66.2237	106.805	0	0	0	1.1757	0	0	2.2901	0.93357	0	0	2.4467	0	3.2081	0.34855	0	2.2391	1.5695	-0.88382	2.2475	1.5406	0.90374	0.74931	2.9093	0.62874	0.14571	2.5503	-1.07	-1.0248	2.56	0.33179
1364	-180	140	-180	2.44672	116.36	48.5838	53.8646	108.745	0	0	0	1.178	0	0	1.8994	1.332	0	-1.0864	-2.1923	0	2.9679	1.1326	0	1.6131	1.8895	-0.89237	1.6131	1.8892	0.89258	-1.8618	-1.8977	0.69278	-1.3156	-2.2022	-1.0566	-0.26634	-2.799	0.35924
1365	-180	140	-180	2.44672	243.64	45.6707	48.1809	107.493	0	0	0	1.1758	0	0	2.0212	1.2273	0	-1.0864	2.1923	0	3.068	0.93267	0	1.7799	1.8099	-0.89006	1.7834	1.8054	0.89367	-0.53955	2.8565	0.65858	-1.0534	2.4091	-1.0608	-1.9982	1.7558	0.38276
1366	-60	-180	-180	1.8	180	77.2802	77.1891	114.634	0	0	0	1.2241	0	0	1.8988	1.3921	0	-1.8	0	0	2.9806	1.2484	0	1.591	1.9441	-0.89242	1.591	1.9441	0.89242	-2.2124	1.0062	0	-1.9622	-0.56232	-0.90947	-1.9622	-0.56231	0.90947
1367	-60	-180	-180	1.8	90	65.4185	66.4391	100.19	0	0	0	1.253	0	0	2.2559	1.0723	0	0	0.9	1.5588	3.2305	0.58747	0	2.1262	1.5677	-0.96634	2.2372	1.8312	0.78736	0.50603	1.8445	1.4418	-1.031	1.0415	1.8834	0.51814	0.21159	2.2157
1368	-60	-180	-180	1.8	270	56.4945	58.0006	99.3606	0	0	0	1.2728	0	0	1.894	1.348	0	0	-0.9	-1.5588	2.9768	1.2305	0	1.5967	1.8207	-0.93931	1.5674	1.9948	0.82475	-0.53721	-0.18161	-2.1755	1.036	-1.0437	-1.8261	-0.56073	-1.8292	-1.4596
1369	-60	-180	-180	1.8	116.36	41.0259	40.9736	86.0372	0	0	0	1.2143	0	0	2.0509	1.2236	0	-0.79923	0.80642	1.3968	3.0967	0.92359	0	1.8305	1.6896	-0.96064	1.8501	1.9424	0.80603	-0.58634	1.8637	1.55	-1.8483	0.62203	1.1932	-0.41211	0.17389	2.1897
1370	-60	-180	-180	1.8	243.64	44.6172	45.2724	82.2492	0	0	0	1.226	0	0	1.8745	1.3347	0	-0.79923	-0.80642	-1.3968	2.9529	1.1886	0	1.5869	1.7956	-0.94571	1.56	1.9906	0.82159	-1.3356	0.068182	-1.7495	-0.0069123	-1.1576	-2.052	-1.4612	-1.5904	-1.0388
1371	-60	-180	-180	1.8	96.8508	53.7319	53.9616	93.0238	0	0	0	1.2352	0	0	2.177	1.1278	0	-0.21471	0.89357	1.5477	3.1822	0.71087	0	2.011	1.6079	-0.96688	2.0909	1.8807	0.79065	0.23713	1.8764	1.5073	-1.2816	0.95542	1.7537	0.28272	0.22107	2.2367
1372	-60	-180	-180	1.8	145.558	54.0293	54.0475	94.5434	0	0	0	1.2117	0	0	2.0012	1.2925	0	-1.4845	0.50901	0.88163	3.0608	1.0434	0	1.7555	1.7824	-0.94286	1.7551	1.9618	0.83309	-1.6818	1.5633	1.085	-2.1858	0.06271	0.19061	-1.3113	-0.088472	1.7703
1373	-60	-180	-180	1.8	214.442	61.6824	65.5609	85.0626	0	0	0	1.2218	0	0	1.8476	1.3526	0	-1.4845	-0.50901	-0.88163	2.9289	1.2239	0	1.5453	1.8599	-0.91832	1.5229	1.949	0.85965	-1.8891	0.48354	-1.0231	-1.2498	-1.0518	-1.7951	-2.0184	-1.0963	-0.14299
1374	-60	-180	-180	1.8	263.149	49.2525	49.9724	92.0267	0	0	0	1.2528	0	0	1.8918	1.3397	0	-0.21471	-0.89357	-1.5477	2.9721	1.2045	0	1.6024	1.7969	-0.94826	1.5743	2.0042	0.81432	-0.76788	-0.13364	-2.0951	0.79131	-1.0757	-1.8998	-0.80748	-1.7964	-1.4073
1375	-60	-180	-180	1.1	180	111.996	112.075	144.944	0	0	0	1.2249	0	0	1.8367	1.3807	0	-1.1	0	0	2.9197	1.2652	0	1.5256	1.9354	-0.89071	1.5256	1.9354	0.89071	-1.7537	0.9752	0	-1.5811	-0.60126	-0.8365	-1.5811	-0.60126	0.8365
1376	-60	-180	-180	1.1	90	166.668	198.533	188.084	0	0	0	1.6292	0	0	2.3296	1.2654	0	0	0.55	0.95263	3.3914	1.011	0	2.0934	1.8851	-0.87715	2.1717	1.8733	0.8983	0.46985	1.5673	1.0869	-1.0312	0.70892	1.3917	0.52677	0.05558	1.86
1377	-60	-180	-180	1.1	270	151.53	158.506	209.912	0	0	0	1.4903	0	0	1.9825	1.3713	0	0	-0.55	-0.95263	3.0737	1.3517	0	1.6501	1.8876	-0.91259	1.6064	1.9448	0.8563	-0.52999	0.015072	-1.8098	0.88409	-0.95772	-1.492	-0.81206	-1.38	-1.0287
1378	-60	-180	-180	1.1	116.36	122.406	127.185	154.431	0	0	0	1.3206	0	0	2.0287	1.2887	0	-0.48842	0.49281	0.85357	3.0937	1.0647	0	1.7784	1.8226	-0.92368	1.8202	1.9503	0.84946	-0.28272	1.6054	1.0392	-1.6031	0.47489	0.85779	-0.25421	0.096004	1.883
1379	-60	-180	-180	1.1	243.64	113.493	114.48	156.68	0	0	0	1.2995	0	0	1.8878	1.3342	0	-0.48842	-0.49281	-0.85357	2.9728	1.2369	0	1.5917	1.8022	-0.94693	1.5539	1.9917	0.81575	-1.1569	0.19776	-1.4582	0.12497	-1.046	-1.6088	-1.3575	-1.1708	-0.58385
1380	-60	-180	-180	1.1	96.8508	151.425	169.223	178.444	0	0	0	1.4751	0	0	2.2123	1.2528	0	-0.13121	0.54607	0.94583	3.2676	0.98059	0	1.9819	1.852	-0.89146	2.0581	1.8806	0.88397	0.27639	1.5893	1.0854	-1.202	0.68436	1.2633	0.29743	0.091741	1.9092
1381	-60	-180	-180	1.1	145.558	113.836	114.277	141.549	0	0	0	1.2463	0	0	1.8968	1.3567	0	-0.90717	0.31106	0.53877	2.9736	1.1996	0	1.6187	1.8749	-0.92138	1.6134	1.985	0.85325	-1.1359	1.443	0.76671	-1.8893	-0.030946	0.1129	-0.99511	-0.13635	1.5634
1382	-60	-180	-180	1.1	214.442	113.204	114.129	139.764	0	0	0	1.2472	0	0	1.8432	1.3478	0	-0.90717	-0.31106	-0.53877	2.9272	1.2421	0	1.5342	1.8461	-0.92513	1.5193	1.9636	0.84807	-1.6524	0.49472	-0.88863	-0.80548	-1.0193	-1.434	-1.6478	-0.87848	0.097642
1383	-60	-180	-180	1.1	263.149	136.593	140.176	193.73	0	0	0	1.4084	0	0	1.9388	1.3574	0	-0.13121	-0.54607	-0.94583	3.0282	1.3095	0	1.6229	1.8499	-0.9311	1.5751	1.9717	0.83437	-0.70823	0.052841	-1.7346	0.69645	-0.98556	-1.5387	-0.97839	-1.332	-0.93777
1384	-60	-180	-180	2.5	180	58.3103	82.3183	103.759	0	0	0	1.1713	0	0	1.993	1.2822	0	-2.5	0	0	3.0441	1.0066	0	1.7429	1.854	-0.89378	1.7429	1.854	0.89378	-3.2761	0.75705	0	-2.2409	-0.48324	-0.92912	-2.2409	-0.48324	0.92912
1385	-60	-180	-180	2.5	90	57.7361	70.7776	102.378	0	0	0	1.1745	0	0	2.0826	1.1806	0	0	1.25	2.1651	3.1091	0.82167	0	1.8882	1.7625	-0.90325	1.8733	1.7839	0.88136	0.42528	2.2239	2.3786	-1.074	1.1862	2.0604	0.51196	0.38578	2.5666
1386	-60	-180	-180	2.5	270	57.0174	78.055	99.9758	0	0	0	1.1768	0	0	1.9593	1.3022	0	0	-1.25	-2.1651	3.018	1.0561	0	1.6976	1.8558	-0.90223	1.6975	1.8862	0.88334	-0.54056	-0.44908	-2.6504	1.0773	-1.2828	-2.2226	-0.53823	-2.1326	-1.8499
1387	-60	-180	-180	2.5	116.36	51.4283	62.9461	98.3531	0	0	0	1.1743	0	0	1.9908	1.2672	0	-1.11	1.12	1.9399	3.0437	0.99718	0	1.7428	1.8257	-0.90288	1.7341	1.855	0.88379	-0.8769	2.17	2.0632	-2.0441	0.84567	1.4734	-0.61425	0.39626	2.5719
1388	-60	-180	-180	2.5	243.64	53.5932	71.655	95.4448	0	0	0	1.1751	0	0	1.9633	1.2964	0	-1.11	-1.12	-1.9399	3.0207	1.0454	0	1.7045	1.8498	-0.90302	1.703	1.8817	0.88308	-1.5621	-0.16096	-2.1456	-0.20351	-1.4089	-2.4526	-1.6635	-1.8581	-1.3784
1389	-60	-180	-180	2.5	96.8508	54.3109	66.2044	100.06	0	0	0	1.1747	0	0	2.0411	1.2176	0	-0.29821	1.2411	2.1496	3.0809	0.8998	0	1.8212	1.7921	-0.90118	1.8096	1.8115	0.88461	0.093995	2.2421	2.2807	-1.3608	1.1288	1.9888	0.23103	0.42195	2.6173
1390	-60	-180	-180	2.5	145.558	54.2935	69.8437	101.449	0	0	0	1.173	0	0	1.9902	1.2798	0	-2.0618	0.70696	1.2245	3.0425	1.0086	0	1.7398	1.8414	-0.9002	1.7377	1.8629	0.88668	-2.2631	1.7509	1.4293	-2.5232	0.23959	0.36895	-1.665	0.081042	2.011
1391	-60	-180	-180	2.5	214.442	56.1777	80.4465	95.4464	0	0	0	1.1724	0	0	1.9722	1.2921	0	-2.0618	-0.70696	-1.2245	3.0275	1.0329	0	1.716	1.8552	-0.89767	1.7141	1.8676	0.88964	-2.2611	0.35328	-1.2442	-1.7091	-1.2078	-2.1156	-2.3448	-1.2874	-0.35981
1392	-60	-180	-180	2.5	263.149	55.1919	74.0148	98.1734	0	0	0	1.1768	0	0	1.9599	1.3005	0	-0.29821	-1.2411	-2.1496	3.0183	1.0536	0	1.699	1.8519	-0.90382	1.6984	1.8875	0.8817	-0.83387	-0.39412	-2.5549	0.76775	-1.325	-2.2988	-0.85512	-2.1045	-1.8149
1393	-60	-180	-180	1.30503	180	52.1523	52.1842	87.501	0	0	0	1.2211	0	0	1.8484	1.3897	0	-1.305	0	0	2.9319	1.2716	0	1.5317	1.9385	-0.89161	1.5317	1.9385	0.89161	-1.8502	0.98179	0	-1.6941	-0.56509	-0.86714	-1.6941	-0.56508	0.86714
1394	-60	-180	-180	1.30503	90	85.505	95.5397	109.645	0	0	0	1.3859	0	0	2.2986	1.1418	0	0	0.65251	1.1302	3.303	0.72006	0	2.1495	1.7231	-0.91851	2.2404	1.8212	0.8546	0.48168	1.6326	1.1592	-1.036	0.86416	1.4749	0.41764	0.097879	1.9905
1395	-60	-180	-180	1.30503	270	69.7527	73.3576	120.09	0	0	0	1.3731	0	0	1.9413	1.3501	0	0	-0.65251	-1.1302	3.029	1.278	0	1.6329	1.8448	-0.92945	1.586	1.9678	0.83526	-0.52966	-0.026477	-1.8807	0.92977	-0.96435	-1.6108	-0.68209	-1.5388	-1.1295
1396	-60	-180	-180	1.30503	116.36	45.4458	47.0261	80.8178	0	0	0	1.2749	0	0	2.0395	1.2689	0	-0.57945	0.58466	1.0127	3.0958	1.0076	0	1.8068	1.7593	-0.94929	1.846	1.9754	0.81717	-0.35919	1.6622	1.1645	-1.672	0.52623	0.9383	-0.32231	0.087109	1.959
1397	-60	-180	-180	1.30503	243.64	40.0781	40.862	78.8633	0	0	0	1.2685	0	0	1.8886	1.3275	0	-0.57945	-0.58466	-1.0127	2.9708	1.2063	0	1.5995	1.7828	-0.9517	1.5625	1.9964	0.80937	-1.2005	0.16606	-1.5293	0.099164	-1.0615	-1.7369	-1.3401	-1.3292	-0.70864
1398	-60	-180	-180	1.30503	96.8508	69.1677	75.036	98.6123	0	0	0	1.3411	0	0	2.2066	1.1812	0	-0.15567	0.64785	1.1221	3.2305	0.81091	0	2.0262	1.7245	-0.93484	2.1087	1.8822	0.83525	0.27088	1.6569	1.1753	-1.2243	0.79995	1.3634	0.23024	0.11521	2.0074
1399	-60	-180	-180	1.30503	145.558	46.9913	47.2081	78.6967	0	0	0	1.2356	0	0	1.9223	1.3522	0	-1.0763	0.36904	0.63919	2.9968	1.1772	0	1.6509	1.8486	-0.93413	1.6427	1.9998	0.8405	-1.2672	1.4589	0.84214	-1.9793	0.00033523	0.13496	-1.0742	-0.12879	1.6207
1400	-60	-180	-180	1.30503	214.442	48.7272	50.1278	73.7452	0	0	0	1.24	0	0	1.8447	1.3519	0	-1.0763	-0.36904	-0.63919	2.9287	1.2427	0	1.5329	1.8491	-0.92316	1.5154	1.9597	0.85106	-1.7169	0.48653	-0.92569	-0.89456	-0.98665	-1.5462	-1.7373	-0.98462	-0.0017558
1401	-60	-180	-180	1.30503	263.149	56.1508	57.9068	105.428	0	0	0	1.3299	0	0	1.9269	1.3372	0	-0.15567	-0.64785	-1.1221	3.0121	1.2397	0	1.632	1.8066	-0.94579	1.5861	1.9908	0.81488	-0.72032	0.012017	-1.811	0.73046	-0.99877	-1.654	-0.87666	-1.4955	-1.0513
1402	-60	-180	-180	2.29497	180	64.0526	83.7345	110.078	0	0	0	1.1734	0	0	2.0012	1.2794	0	-2.295	0	0	3.0511	0.99938	0	1.7541	1.8526	-0.89381	1.7541	1.8526	0.89381	-3.0111	0.81665	0	-2.1368	-0.53347	-0.92547	-2.1368	-0.53347	0.92547
1403	-60	-180	-180	2.29497	90	62.3098	69.9191	105.268	0	0	0	1.1818	0	0	2.1339	1.1319	0	0	1.1475	1.9875	3.1422	0.72428	0	1.9676	1.7034	-0.91567	1.9749	1.7715	0.86416	0.46339	2.1228	2.0716	-1.0787	1.1244	2.0783	0.5275	0.32893	2.4605
1404	-60	-180	-180	2.29497	270	60.4276	73.6442	103.57	0	0	0	1.1881	0	0	1.9374	1.3152	0	0	-1.1475	-1.9875	3.0019	1.0941	0	1.6673	1.8512	-0.91072	1.6655	1.9138	0.87181	-0.54063	-0.36516	-2.5053	1.0745	-1.188	-2.0827	-0.52673	-2.0725	-1.7903
1405	-60	-180	-180	2.29497	116.36	51.5425	57.3639	98.5366	0	0	0	1.1796	0	0	2.0033	1.2522	0	-1.019	1.0282	1.7808	3.0546	0.97528	0	1.7623	1.7987	-0.91219	1.7544	1.8615	0.873	-0.78362	2.0792	1.9015	-2.0004	0.77744	1.4047	-0.55362	0.3272	2.4615
1406	-60	-180	-180	2.29497	243.64	54.6862	66.0743	95.7998	0	0	0	1.1817	0	0	1.9471	1.3024	0	-1.019	-1.0282	-1.7808	3.0086	1.0682	0	1.6836	1.8409	-0.9108	1.6801	1.9012	0.87311	-1.4958	-0.090282	-2.0282	-0.13956	-1.33	-2.3335	-1.6103	-1.7906	-1.2933
1407	-60	-180	-180	2.29497	96.8508	56.6545	63.055	101.388	0	0	0	1.1815	0	0	2.0772	1.1832	0	-0.27376	1.1393	1.9733	3.1069	0.83373	0	1.8764	1.7473	-0.91235	1.878	1.8085	0.87042	0.14693	2.1359	2.0273	-1.3535	1.07	1.9666	0.25445	0.35742	2.5036
1408	-60	-180	-180	2.29497	145.558	56.4577	66.1263	103.82	0	0	0	1.1773	0	0	1.9975	1.2742	0	-1.8927	0.64898	1.1241	3.0495	1.0005	0	1.7508	1.8284	-0.90586	1.749	1.87	0.88031	-2.0847	1.6971	1.324	-2.427	0.18022	0.3122	-1.5681	0.022584	1.9439
1409	-60	-180	-180	2.29497	214.442	59.6255	78.2486	96.5881	0	0	0	1.1764	0	0	1.9593	1.2972	0	-1.8927	-0.64898	-1.1241	3.0178	1.0507	0	1.6993	1.8535	-0.90097	1.6954	1.8776	0.88538	-2.1439	0.3996	-1.1741	-1.601	-1.1659	-2.0292	-2.2518	-1.228	-0.28622
1410	-60	-180	-180	2.29497	263.149	57.2616	68.7776	100.22	0	0	0	1.1865	0	0	1.941	1.3101	0	-0.27376	-1.1393	-1.9733	3.0045	1.0845	0	1.6736	1.8437	-0.91282	1.6712	1.9129	0.86975	-0.81529	-0.31507	-2.419	0.78401	-1.2358	-2.169	-0.83171	-2.0338	-1.729
1411	-60	-180	-180	1.15328	180	86.127	86.1913	119.86	0	0	0	1.2229	0	0	1.8404	1.3835	0	-1.1533	0	0	2.9235	1.2664	0	1.5278	1.9364	-0.89105	1.5278	1.9364	0.89105	-1.7766	0.97511	0	-1.6075	-0.5872	-0.84677	-1.6075	-0.5872	0.84677
1412	-60	-180	-180	1.15328	90	136.396	158.842	159.22	0	0	0	1.5279	0	0	2.3101	1.2258	0	0	0.57664	0.99877	3.3522	0.90377	0	2.1091	1.8452	-0.88502	2.1943	1.851	0.89039	0.4722	1.5787	1.0987	-1.0353	0.76302	1.4009	0.46029	0.061001	1.9
1413	-60	-180	-180	1.15328	270	120.159	125.816	176.167	0	0	0	1.4482	0	0	1.9637	1.3654	0	0	-0.57664	-0.99877	3.054	1.3306	0	1.6395	1.8751	-0.91844	1.592	1.9525	0.84921	-0.52878	0.0071244	-1.8194	0.89546	-0.95456	-1.5264	-0.76862	-1.4266	-1.0505
1414	-60	-180	-180	1.15328	116.36	91.5722	95.0167	124.406	0	0	0	1.3038	0	0	2.0337	1.2811	0	-0.51208	0.51668	0.89492	3.0951	1.0417	0	1.7911	1.8002	-0.9333	1.8325	1.9596	0.83795	-0.30233	1.6161	1.0697	-1.6202	0.49049	0.87407	-0.28011	0.084656	1.8984
1415	-60	-180	-180	1.15328	243.64	83.5433	84.3723	125.347	0	0	0	1.2879	0	0	1.8901	1.3301	0	-0.51208	-0.51668	-0.89492	2.974	1.2225	0	1.598	1.7921	-0.94992	1.5601	1.9947	0.81173	-1.1655	0.19045	-1.4726	0.11984	-1.0492	-1.6409	-1.3458	-1.2176	-0.61347
1416	-60	-180	-180	1.53212	180	53.8066	53.7779	90.0085	0	0	0	1.2234	0	0	1.8585	1.3954	0	-1.5321	0	0	2.9429	1.2771	0	1.5386	1.9415	-0.89192	1.5386	1.9415	0.89192	-1.9794	1.0019	0	-1.8317	-0.55439	-0.88949	-1.8317	-0.55439	0.88949
1417	-60	-180	-180	1.53212	90	63.6851	67.9295	92.4382	0	0	0	1.3141	0	0	2.2813	1.102	0	0	0.76606	1.3269	3.2676	0.64051	0	2.1473	1.6335	-0.94862	2.2524	1.8328	0.81419	0.49493	1.7262	1.2754	-1.0354	0.9472	1.6448	0.46024	0.15335	2.1017
1418	-60	-180	-180	1.53212	270	50.4008	52.6773	95.896	0	0	0	1.3175	0	0	1.9194	1.3436	0	0	-0.76606	-1.3269	3.0045	1.2451	0	1.6187	1.825	-0.93611	1.5795	1.9818	0.82675	-0.53309	-0.093762	-2.0091	0.98295	-1.0002	-1.7161	-0.61094	-1.6779	-1.2683
1419	-60	-180	-180	1.53212	116.36	32.7765	33.0804	72.4844	0	0	0	1.2471	0	0	2.0417	1.2546	0	-0.68029	0.6864	1.1889	3.0941	0.97829	0	1.8143	1.7205	-0.96088	1.8467	1.9798	0.80153	-0.45303	1.7493	1.3253	-1.7536	0.57	1.0521	-0.36362	0.11958	2.0635
1420	-60	-180	-180	1.53212	243.64	31.3893	32.1186	68.0994	0	0	0	1.2509	0	0	1.8761	1.3336	0	-0.68029	-0.6864	-1.1889	2.9577	1.2077	0	1.5852	1.787	-0.94996	1.5504	1.9977	0.81253	-1.2619	0.12457	-1.6281	0.056903	-1.0955	-1.8823	-1.3784	-1.4602	-0.85736
1421	-60	-180	-180	2.06788	180	74.1198	85.8351	120.006	0	0	0	1.18	0	0	2.011	1.2833	0	-2.0679	0	0	3.0611	1.0024	0	1.766	1.858	-0.89381	1.766	1.858	0.89381	-2.7829	0.82365	0	-1.9946	-0.56543	-0.91847	-1.9946	-0.56542	0.91847
1422	-60	-180	-180	2.06788	90	66.7463	68.8889	105.83	0	0	0	1.2033	0	0	2.209	1.074	0	0	1.0339	1.7908	3.1888	0.60095	0	2.0752	1.6069	-0.94414	2.1382	1.781	0.82399	0.5018	1.9854	1.7005	-1.0454	1.11	2.0731	0.54452	0.2789	2.344
1423	-60	-180	-180	2.06788	270	62.7657	67.5159	105.263	0	0	0	1.2189	0	0	1.9024	1.3371	0	0	-1.0339	-1.7908	2.977	1.1667	0	1.6171	1.8397	-0.92585	1.6071	1.9615	0.84899	-0.53941	-0.28256	-2.358	1.0657	-1.1031	-1.9473	-0.52712	-1.9736	-1.6593
1424	-60	-180	-180	2.06788	116.36	49.4743	50.3641	96.1456	0	0	0	1.1916	0	0	2.0308	1.2266	0	-0.91817	0.92643	1.6046	3.0779	0.93314	0	1.8035	1.7428	-0.93301	1.8016	1.8827	0.84724	-0.69625	1.9802	1.7444	-1.938	0.7038	1.3191	-0.48855	0.25566	2.3398
1425	-60	-180	-180	2.06788	243.64	53.9432	58.1284	93.6272	0	0	0	1.1973	0	0	1.9156	1.3152	0	-0.91817	-0.92643	-1.6046	2.9847	1.1157	0	1.6424	1.8229	-0.92567	1.6323	1.9391	0.85272	-1.4223	-0.015073	-1.8993	-0.077366	-1.2464	-2.2083	-1.5447	-1.7058	-1.1885
1426	-60	-180	-180	2.44672	180	59.5379	82.638	105.125	0	0	0	1.1717	0	0	1.9949	1.2815	0	-2.4467	0	0	3.0456	1.0048	0	1.7454	1.8536	-0.89379	1.7454	1.8536	0.89379	-3.1959	0.78415	0	-2.2183	-0.50024	-0.92846	-2.2183	-0.50025	0.92846
1427	-60	-180	-180	2.44672	90	58.827	70.499	103.215	0	0	0	1.1758	0	0	2.0941	1.1691	0	0	1.2234	2.1189	3.1168	0.79927	0	1.9063	1.7496	-0.90566	1.895	1.78	0.87793	0.43426	2.199	2.3045	-1.0785	1.1656	2.0639	0.51553	0.36925	2.5377
1428	-60	-180	-180	2.44672	270	57.8529	76.9597	100.926	0	0	0	1.1789	0	0	1.9548	1.3049	0	0	-1.2234	-2.1189	3.0146	1.0638	0	1.6913	1.855	-0.90399	1.691	1.892	0.88102	-0.54065	-0.42562	-2.61	1.0769	-1.2567	-2.1843	-0.535	-2.1208	-1.8411
1429	-60	-180	-180	2.44672	116.36	51.5197	61.5642	98.4907	0	0	0	1.1753	0	0	1.9933	1.2639	0	-1.0864	1.0962	1.8986	3.046	0.99256	0	1.7468	1.8202	-0.90471	1.7382	1.8561	0.8817	-0.85092	2.1462	2.0188	-2.034	0.82758	1.4563	-0.59819	0.3778	2.5429
1430	-60	-180	-180	2.44672	243.64	53.9047	70.3251	95.6179	0	0	0	1.1763	0	0	1.96	1.2977	0	-1.0864	-1.0962	-1.8986	3.0183	1.0501	0	1.7003	1.8481	-0.90462	1.6984	1.8858	0.88106	-1.5448	-0.14225	-2.1148	-0.18588	-1.3881	-2.4204	-1.6503	-1.8413	-1.3567
1431	-60	-180	-60	1.8	180	77.2802	77.1891	114.634	0	0	0	1.2241	0	0	1.8988	1.3921	0	-1.8	0	0	1.5926	1.9431	-0.89357	1.5894	1.9451	0.89124	2.9806	1.2484	0.0020097	-2.2124	1.0063	0	-1.9622	-0.56229	-0.90949	-1.9622	-0.56234	0.90945
1432	-60	-180	-60	1.8	90	65.4167	66.6249	99.4966	0	0	0	1.2541	0	0	2.2486	1.0829	0	0	0.9	1.5588	2.0556	1.6524	-0.91331	2.2819	1.7732	0.84738	3.2219	0.60491	-0.094491	0.50687	1.8438	1.4378	-1.0315	1.0414	1.8813	0.51873	0.2134	2.2172
1433	-60	-180	-60	1.8	270	56.6135	58.3011	98.9261	0	0	0	1.274	0	0	1.8938	1.3487	0	0	-0.9	-1.5588	1.5534	1.8577	-0.90396	1.5871	1.9677	0.85491	2.9765	1.2359	-0.0058722	-0.53704	-0.18272	-2.1769	1.0355	-1.045	-1.8274	-0.56082	-1.8288	-1.4567
1434	-60	-180	-60	1.8	116.36	41.2324	41.1803	85.6211	0	0	0	1.2142	0	0	2.0492	1.2267	0	-0.79923	0.80642	1.3968	1.767	1.7492	-0.91327	1.8889	1.904	0.85117	3.0938	0.92885	-0.045654	-0.58642	1.8637	1.5501	-1.8483	0.62156	1.1936	-0.41127	0.17375	2.1892
1435	-60	-180	-60	1.8	243.64	44.7748	45.5487	81.7611	0	0	0	1.2266	0	0	1.8748	1.3355	0	-0.79923	-0.80642	-1.3968	1.5366	1.8372	-0.90638	1.5887	1.9617	0.85605	2.9528	1.1921	-0.016256	-1.3364	0.067025	-1.7511	-0.0067013	-1.158	-2.0514	-1.4603	-1.5904	-1.0371
1436	-60	-180	-60	1.8	96.8508	53.8301	54.1572	92.361	0	0	0	1.2361	0	0	2.1716	1.1357	0	-0.21471	0.89357	1.5477	1.9402	1.6853	-0.91453	2.1354	1.8297	0.84677	3.1753	0.72377	-0.078828	0.23872	1.8756	1.5024	-1.2817	0.95643	1.7516	0.28242	0.22269	2.2387
1437	-60	-180	-60	1.8	145.558	54.1397	54.1916	94.1926	0	0	0	1.2118	0	0	1.9999	1.294	0	-1.4845	0.50901	0.88163	1.7097	1.8243	-0.90707	1.7825	1.9315	0.86625	3.0592	1.0477	-0.028903	-1.6796	1.5639	1.0839	-2.1865	0.06308	0.1911	-1.3119	-0.087753	1.7709
1438	-60	-180	-60	1.8	214.442	61.7235	65.69	84.873	0	0	0	1.2219	0	0	1.848	1.3526	0	-1.4845	-0.50901	-0.88163	1.5207	1.8796	-0.8979	1.5345	1.9338	0.87503	2.9293	1.2267	-0.0020974	-1.8898	0.48322	-1.0235	-1.2491	-1.0517	-1.7949	-2.0181	-1.0965	-0.14305
1439	-60	-180	-60	1.8	263.149	49.4214	50.2888	91.5038	0	0	0	1.2538	0	0	1.8917	1.3407	0	-0.21471	-0.89357	-1.5477	1.5499	1.8411	-0.90695	1.6023	1.9734	0.85113	2.9716	1.209	-0.014863	-0.76794	-0.13484	-2.0966	0.79091	-1.0766	-1.9005	-0.80722	-1.796	-1.4043
1440	-60	-180	-60	1.1	180	111.996	112.075	144.944	0	0	0	1.2249	0	0	1.8367	1.3807	0	-1.1	0	0	1.5223	1.9373	-0.88836	1.5291	1.9335	0.89311	2.9197	1.2651	-0.0041319	-1.7537	0.9752	0	-1.581	-0.60119	-0.83656	-1.5812	-0.60133	0.83644
1441	-60	-180	-60	1.1	90	166.58	197.672	188.456	0	0	0	1.6246	0	0	2.3227	1.2684	0	0	0.55	0.95263	2.0817	1.8837	-0.87947	2.1966	1.8703	0.90547	3.3822	1.0074	-0.053548	0.4704	1.567	1.0847	-1.0313	0.71151	1.3909	0.52333	0.055707	1.8614
1442	-60	-180	-60	1.1	270	151.565	158.648	209.739	0	0	0	1.4901	0	0	1.9811	1.3719	0	0	-0.55	-0.95263	1.6244	1.9049	-0.89278	1.6139	1.9304	0.8711	3.072	1.3568	-0.00013832	-0.52999	0.01474	-1.8104	0.88417	-0.95752	-1.4924	-0.81182	-1.3803	-1.0287
1443	-60	-180	-60	1.1	116.36	122.374	127.174	154.514	0	0	0	1.3205	0	0	2.0248	1.2914	0	-0.48842	0.49281	0.85357	1.7379	1.849	-0.89869	1.8535	1.9289	0.87591	3.0887	1.0686	-0.053256	-0.28142	1.6059	1.0377	-1.603	0.47485	0.85885	-0.25218	0.097902	1.8833
1444	-60	-180	-60	1.1	243.64	113.652	114.759	156.285	0	0	0	1.3006	0	0	1.8875	1.3354	0	-0.48842	-0.49281	-0.85357	1.5386	1.8424	-0.90671	1.5838	1.9646	0.85103	2.9718	1.241	-0.019207	-1.1575	0.19723	-1.4592	0.12456	-1.0463	-1.6087	-1.3578	-1.1708	-0.5838
1445	-60	-180	-60	1.1	96.8508	151.307	168.678	178.995	0	0	0	1.4731	0	0	2.2057	1.2568	0	-0.13121	0.54607	0.94583	1.9622	1.8569	-0.88789	2.0867	1.873	0.89603	3.2591	0.98134	-0.060417	0.27732	1.5894	1.0832	-1.202	0.6861	1.2631	0.29626	0.092267	1.9095
1446	-60	-180	-60	1.1	145.558	113.88	114.346	141.431	0	0	0	1.2463	0	0	1.896	1.3571	0	-0.90717	0.31106	0.53877	1.5833	1.9005	-0.89499	1.6382	1.9635	0.87766	2.9725	1.2023	-0.027049	-1.1355	1.4432	0.76648	-1.8893	-0.031133	0.11334	-0.99467	-0.13523	1.5643
1447	-60	-180	-60	1.1	214.442	113.253	114.219	139.629	0	0	0	1.2474	0	0	1.8432	1.348	0	-0.90717	-0.31106	-0.53877	1.5041	1.8684	-0.90153	1.5385	1.9466	0.86813	2.927	1.2437	-0.012994	-1.6527	0.49459	-0.8888	-0.80502	-1.0188	-1.4341	-1.6479	-0.87925	0.097161
1448	-60	-180	-60	1.1	263.149	136.681	140.447	193.403	0	0	0	1.4097	0	0	1.9388	1.3582	0	-0.13121	-0.54607	-0.94583	1.5837	1.8783	-0.90018	1.5937	1.9502	0.85968	3.0278	1.3148	-0.007406	-0.70827	0.051935	-1.7357	0.69663	-0.98646	-1.538	-0.97833	-1.3321	-0.9374
1449	-60	-180	-60	2.5	180	58.3103	82.3182	103.759	0	0	0	1.1713	0	0	1.993	1.2822	0	-2.5	0	0	1.7447	1.8526	-0.89518	1.741	1.8555	0.89233	3.0441	1.0066	0.0025298	-3.2761	0.75704	0	-2.2409	-0.48322	-0.92912	-2.2409	-0.48326	0.92911
1450	-60	-180	-60	2.5	90	57.7391	70.8042	102.335	0	0	0	1.1745	0	0	2.0826	1.1806	0	0	1.25	2.1651	1.882	1.7696	-0.89723	1.8771	1.7782	0.88624	3.1092	0.82234	-0.0035631	0.42531	2.2239	2.3786	-1.0739	1.1863	2.0595	0.5115	0.38575	2.5671
1451	-60	-180	-60	2.5	270	57.0202	78.0941	99.9555	0	0	0	1.1768	0	0	1.9594	1.3022	0	0	-1.25	-2.1651	1.6915	1.8616	-0.89674	1.7001	1.8816	0.88738	3.0181	1.0569	-0.0010271	-0.54056	-0.4491	-2.6504	1.0773	-1.283	-2.2229	-0.53829	-2.1323	-1.8492
1452	-60	-180	-60	2.5	116.36	51.4304	62.9666	98.3322	0	0	0	1.1743	0	0	1.9906	1.2673	0	-1.11	1.12	1.9399	1.7375	1.8315	-0.8978	1.7344	1.8511	0.88686	3.0438	0.99868	0.0023537	-0.87713	2.17	2.0635	-2.0439	0.84557	1.4731	-0.61418	0.39618	2.5718
1453	-60	-180	-60	2.5	243.64	53.5966	71.6909	95.4252	0	0	0	1.1751	0	0	1.9633	1.2965	0	-1.11	-1.12	-1.9399	1.6976	1.8563	-0.89693	1.7064	1.8765	0.8877	3.0209	1.0464	-0.0019829	-1.5621	-0.16098	-2.1457	-0.20348	-1.4089	-2.4526	-1.6634	-1.858	-1.3782
1454	-60	-180	-60	2.5	96.8508	54.3122	66.2199	100.038	0	0	0	1.1747	0	0	2.041	1.2177	0	-0.29821	1.2411	2.1496	1.8171	1.7966	-0.8973	1.8112	1.8081	0.88744	3.081	0.90052	-0.00079962	0.093939	2.2421	2.2809	-1.3607	1.1288	1.9883	0.23087	0.42191	2.6174
1455	-60	-180	-60	2.5	145.558	54.2944	69.8538	101.45	0	0	0	1.173	0	0	1.9901	1.2798	0	-2.0618	0.70696	1.2245	1.7364	1.8449	-0.89699	1.7384	1.8603	0.88879	3.0426	1.0093	0.00051331	-2.2633	1.7508	1.4294	-2.5232	0.23957	0.36896	-1.6648	0.081059	2.0109
1456	-60	-180	-60	2.5	214.442	56.178	80.458	95.4468	0	0	0	1.1724	0	0	1.9722	1.2921	0	-2.0618	-0.70696	-1.2245	1.714	1.8574	-0.89563	1.7143	1.866	0.89085	3.0276	1.0333	0.00090568	-2.2612	0.35326	-1.2443	-1.7088	-1.2077	-2.1155	-2.3449	-1.2874	-0.35981
1457	-60	-180	-60	2.5	263.149	55.196	74.058	98.1314	0	0	0	1.1768	0	0	1.9599	1.3006	0	-0.29821	-1.2411	-2.1496	1.6914	1.8589	-0.89715	1.7021	1.8818	0.88677	3.0184	1.0546	-0.0021574	-0.83387	-0.39412	-2.5549	0.7677	-1.3252	-2.2991	-0.85511	-2.1043	-1.8143
1458	-60	-180	-60	1.30503	180	52.1523	52.1842	87.501	0	0	0	1.2211	0	0	1.8484	1.3897	0	-1.305	0	0	1.5315	1.9387	-0.89147	1.5319	1.9384	0.89175	2.9319	1.2716	-0.00024154	-1.8502	0.98179	0	-1.6941	-0.56508	-0.86714	-1.6941	-0.56509	0.86714
1459	-60	-180	-60	1.30503	90	85.307	95.3261	109.931	0	0	0	1.3858	0	0	2.2886	1.151	0	0	0.65251	1.1302	2.1062	1.7571	-0.89661	2.2762	1.792	0.88451	3.2915	0.73241	-0.08438	0.48233	1.6328	1.1572	-1.0356	0.86433	1.4756	0.41918	0.09852	1.9901
1460	-60	-180	-60	1.30503	270	69.8302	73.6493	119.775	0	0	0	1.3742	0	0	1.9409	1.3509	0	0	-0.65251	-1.1302	1.5971	1.8741	-0.8997	1.5981	1.9455	0.85864	3.0283	1.2845	0.0021056	-0.52941	-0.027578	-1.8817	0.93017	-0.96487	-1.6101	-0.68142	-1.5393	-1.1286
1461	-60	-180	-60	1.30503	116.36	45.515	47.2209	80.472	0	0	0	1.2753	0	0	2.0353	1.2727	0	-0.57945	0.58466	1.0127	1.7459	1.8094	-0.9072	1.8864	1.9394	0.85958	3.0903	1.0144	-0.059681	-0.35786	1.6625	1.1628	-1.672	0.52603	0.93942	-0.3204	0.088868	1.9596
1462	-60	-180	-60	1.30503	243.64	40.2701	41.1943	78.3404	0	0	0	1.2696	0	0	1.8886	1.3286	0	-0.57945	-0.58466	-1.0127	1.5433	1.8288	-0.90809	1.5936	1.9659	0.84809	2.9702	1.2103	-0.017143	-1.2011	0.16494	-1.5305	0.099014	-1.0617	-1.7368	-1.3396	-1.3296	-0.70808
1463	-60	-180	-60	1.30503	96.8508	69.0474	75.017	98.6074	0	0	0	1.3413	0	0	2.1981	1.189	0	-0.15567	0.64785	1.1221	1.9733	1.7687	-0.90286	2.147	1.848	0.8723	3.2206	0.8228	-0.079672	0.27176	1.6571	1.1732	-1.224	0.79957	1.3644	0.23258	0.1163	2.0071
1464	-60	-180	-60	1.30503	145.558	47.0747	47.3233	78.4573	0	0	0	1.2357	0	0	1.9212	1.353	0	-1.0763	0.36904	0.63919	1.6071	1.8838	-0.90071	1.6705	1.9717	0.87171	2.9954	1.1809	-0.028652	-1.2665	1.4591	0.84173	-1.9794	0.00048823	0.1351	-1.0745	-0.128	1.6213
1465	-60	-180	-60	1.30503	214.442	48.7707	50.2149	73.6273	0	0	0	1.2401	0	0	1.8448	1.352	0	-1.0763	-0.36904	-0.63919	1.5063	1.8699	-0.90147	1.5301	1.9436	0.86862	2.9287	1.2448	-0.0062725	-1.7173	0.48622	-0.92594	-0.89393	-0.98619	-1.5463	-1.7372	-0.98528	-0.0022328
1466	-60	-180	-60	1.30503	263.149	56.3062	58.2753	104.914	0	0	0	1.3314	0	0	1.9265	1.3385	0	-0.15567	-0.64785	-1.1221	1.5811	1.8484	-0.9054	1.6095	1.9616	0.84985	3.0113	1.2462	-0.0091153	-0.72026	0.010601	-1.8125	0.73057	-0.99947	-1.6536	-0.87599	-1.4959	-1.0502
1467	-60	-180	-60	2.29497	180	64.0525	83.7341	110.078	0	0	0	1.1734	0	0	2.0012	1.2794	0	-2.295	0	0	1.7558	1.8514	-0.89509	1.7524	1.8539	0.89249	3.0511	0.9994	0.0023084	-3.0111	0.81665	0	-2.1367	-0.53346	-0.92548	-2.1368	-0.53349	0.92546
1468	-60	-180	-60	2.29497	90	62.3135	70.0127	105.11	0	0	0	1.1819	0	0	2.134	1.1325	0	0	1.1475	1.9875	1.9508	1.7225	-0.90052	1.993	1.7543	0.88	3.1418	0.72428	-0.023902	0.46512	2.1224	2.0649	-1.0787	1.1262	2.0789	0.52708	0.32984	2.4625
1469	-60	-180	-60	2.29497	270	60.4413	73.7364	103.492	0	0	0	1.1881	0	0	1.9375	1.3152	0	0	-1.1475	-1.9875	1.6531	1.8639	-0.89849	1.6731	1.9035	0.8815	3.0021	1.0956	-0.0046154	-0.54062	-0.36519	-2.5053	1.0744	-1.1883	-2.0832	-0.52686	-2.0723	-1.7894
1470	-60	-180	-60	2.29497	116.36	51.5562	57.4243	98.458	0	0	0	1.1796	0	0	2.0027	1.2528	0	-1.019	1.0282	1.7808	1.7485	1.8123	-0.90026	1.7592	1.8519	0.88198	3.0544	0.97809	-0.0025031	-0.78355	2.0792	1.9015	-2.0002	0.77733	1.4043	-0.55355	0.32711	2.4614
1471	-60	-180	-60	2.29497	243.64	54.6999	66.1539	95.7212	0	0	0	1.1816	0	0	1.9471	1.3026	0	-1.019	-1.0282	-1.7808	1.6693	1.8538	-0.8986	1.6878	1.891	0.88281	3.0088	1.0699	-0.0053337	-1.4959	-0.090347	-2.0283	-0.13946	-1.33	-2.3334	-1.6101	-1.7906	-1.293
1472	-60	-180	-60	2.29497	96.8508	56.662	63.1226	101.281	0	0	0	1.1816	0	0	2.0768	1.1839	0	-0.27376	1.1393	1.9733	1.862	1.7617	-0.90034	1.8891	1.7968	0.88183	3.1066	0.83508	-0.014298	0.14786	2.1356	2.0246	-1.3535	1.0707	1.9664	0.25409	0.35775	2.5044
1473	-60	-180	-60	2.29497	145.558	56.4628	66.1565	103.779	0	0	0	1.1772	0	0	1.9973	1.2743	0	-1.8927	0.64898	1.1241	1.7423	1.8366	-0.89843	1.7529	1.8636	0.88603	3.0495	1.0018	-0.002702	-2.0847	1.6971	1.3239	-2.4271	0.18017	0.31227	-1.5678	0.02263	1.9438
1474	-60	-180	-60	2.29497	214.442	59.6278	78.2803	96.5673	0	0	0	1.1763	0	0	1.9593	1.2972	0	-1.8927	-0.64898	-1.1241	1.694	1.8587	-0.89604	1.6972	1.8736	0.88878	3.018	1.0516	0	-2.1441	0.39954	-1.1742	-1.6005	-1.1659	-2.0291	-2.2518	-1.2281	-0.28624
1475	-60	-180	-60	2.29497	263.149	57.2788	68.8754	100.122	0	0	0	1.1865	0	0	1.941	1.3102	0	-0.27376	-1.1393	-1.9733	1.6575	1.8581	-0.89911	1.6801	1.9014	0.8808	3.0046	1.0863	-0.0061133	-0.81528	-0.31506	-2.419	0.78391	-1.236	-2.1694	-0.83176	-2.0335	-1.7281
1476	-60	-180	-60	1.15328	180	86.1269	86.1913	119.86	0	0	0	1.2229	0	0	1.8404	1.3835	0	-1.1533	0	0	1.5255	1.9377	-0.88938	1.5303	1.935	0.89276	2.9235	1.2664	-0.0029276	-1.7766	0.97511	0	-1.6075	-0.58715	-0.84681	-1.6076	-0.58724	0.84672
1477	-60	-180	-60	1.15328	90	136.234	158.119	159.749	0	0	0	1.525	0	0	2.3009	1.2313	0	0	0.57664	0.99877	2.0878	1.8499	-0.88351	2.2251	1.842	0.90289	3.3402	0.90563	-0.071233	0.47284	1.5788	1.0965	-1.0352	0.7652	1.4006	0.45865	0.061318	1.9007
1478	-60	-180	-60	1.15328	270	120.206	126.038	175.936	0	0	0	1.4491	0	0	1.9637	1.3659	0	0	-0.57664	-0.99877	1.6114	1.8963	-0.89499	1.6022	1.9353	0.86692	3.0537	1.3358	0.0014714	-0.52859	0.0062904	-1.8202	0.89584	-0.95531	-1.5255	-0.76829	-1.4269	-1.05
1479	-60	-180	-60	1.15328	116.36	91.5643	95.0807	124.352	0	0	0	1.3039	0	0	2.0294	1.2843	0	-0.51208	0.51668	0.89492	1.7424	1.835	-0.90185	1.8688	1.9327	0.87026	3.0897	1.047	-0.056762	-0.30106	1.6165	1.0682	-1.6201	0.49027	0.87528	-0.27782	0.086585	1.8988
1480	-60	-180	-60	1.15328	243.64	83.7211	84.674	124.903	0	0	0	1.2891	0	0	1.8899	1.3314	0	-0.51208	-0.51668	-0.89492	1.5425	1.8354	-0.90762	1.5912	1.9658	0.84914	2.9731	1.2266	-0.019306	-1.166	0.18971	-1.4736	0.11951	-1.0494	-1.6408	-1.3458	-1.2178	-0.61329
1481	-60	-180	-60	1.53212	180	53.8066	53.7779	90.0085	0	0	0	1.2234	0	0	1.8585	1.3954	0	-1.5321	0	0	1.5402	1.9406	-0.89303	1.537	1.9424	0.89078	2.9429	1.2771	0.0019206	-1.9794	1.0019	0	-1.8317	-0.5544	-0.88948	-1.8317	-0.55438	0.88949
1482	-60	-180	-60	1.53212	90	63.5605	68.0194	92.106	0	0	0	1.3148	0	0	2.2719	1.1128	0	0	0.76606	1.3269	2.0855	1.6989	-0.90673	2.2929	1.7849	0.86288	3.2573	0.65797	-0.092663	0.49552	1.7262	1.2733	-1.0353	0.94648	1.6448	0.46209	0.15438	2.1015
1483	-60	-180	-60	1.53212	270	50.5063	52.9876	95.4942	0	0	0	1.3186	0	0	1.9188	1.3443	0	0	-0.76606	-1.3269	1.5782	1.8595	-0.90259	1.594	1.9564	0.85406	3.0038	1.2517	0.00053256	-0.53288	-0.094866	-2.0103	0.983	-1.0006	-1.716	-0.61038	-1.6781	-1.2668
1484	-60	-180	-60	1.53212	116.36	32.9429	33.3374	71.9129	0	0	0	1.2478	0	0	2.0383	1.2585	0	-0.68029	0.6864	1.1889	1.746	1.7824	-0.91144	1.8894	1.9381	0.85104	3.0894	0.98527	-0.057421	-0.45116	1.7493	1.3228	-1.7536	0.5704	1.0527	-0.36292	0.12126	2.0645
1485	-60	-180	-60	1.53212	243.64	31.5736	32.4467	67.5689	0	0	0	1.2519	0	0	1.8764	1.3345	0	-0.68029	-0.6864	-1.1889	1.5308	1.8321	-0.90737	1.5803	1.9673	0.85012	2.9574	1.2116	-0.014883	-1.2627	0.12322	-1.6297	0.056925	-1.0957	-1.8821	-1.3775	-1.4604	-0.85618
1486	-60	-180	-60	2.06788	180	74.1198	85.8351	120.006	0	0	0	1.18	0	0	2.011	1.2833	0	-2.0679	0	0	1.7672	1.8571	-0.8947	1.7648	1.8589	0.8929	3.0611	1.0025	0.0016028	-2.7829	0.82364	0	-1.9946	-0.56541	-0.91848	-1.9946	-0.56544	0.91846
1487	-60	-180	-60	2.06788	90	66.7403	69.0391	105.409	0	0	0	1.2035	0	0	2.2059	1.0792	0	0	1.0339	1.7908	2.0309	1.6609	-0.90778	2.1754	1.7385	0.86496	3.1843	0.60778	-0.06475	0.50362	1.9834	1.6908	-1.0454	1.1129	2.0719	0.54399	0.28056	2.3467
1488	-60	-180	-60	2.06788	270	62.8218	67.7065	105.042	0	0	0	1.2189	0	0	1.9025	1.3373	0	0	-1.0339	-1.7908	1.5875	1.8647	-0.90154	1.623	1.9422	0.86919	2.9771	1.1695	-0.0089406	-0.53938	-0.28276	-2.3582	1.0656	-1.1035	-1.9481	-0.52726	-1.9733	-1.6578
1489	-60	-180	-60	2.06788	116.36	49.5449	50.5024	95.8934	0	0	0	1.1917	0	0	2.029	1.2287	0	-0.91817	0.92643	1.6046	1.7692	1.7761	-0.90577	1.8172	1.8605	0.87068	3.0766	0.93902	-0.016253	-0.6955	1.9801	1.7434	-1.9378	0.70383	1.3187	-0.48849	0.25567	2.3397
1490	-60	-180	-60	2.06788	243.64	53.9977	58.292	93.4049	0	0	0	1.1973	0	0	1.9156	1.3155	0	-0.91817	-0.92643	-1.6046	1.6131	1.8479	-0.90186	1.6487	1.9202	0.87254	2.9847	1.1185	-0.011058	-1.4225	-0.01534	-1.8997	-0.077143	-1.2464	-2.208	-1.5443	-1.7057	-1.1878
1491	-60	-180	-60	2.44672	180	59.5379	82.6382	105.125	0	0	0	1.1717	0	0	1.9948	1.2815	0	-2.4467	0	0	1.7472	1.8523	-0.89516	1.7436	1.855	0.89237	3.0456	1.0049	0.0024841	-3.196	0.78409	0	-2.2183	-0.50021	-0.92846	-2.2183	-0.50025	0.92845
1492	-60	-180	-60	2.44672	90	58.8311	70.5409	103.173	0	0	0	1.1758	0	0	2.0941	1.1692	0	0	1.2234	2.1189	1.898	1.7588	-0.89788	1.9014	1.7722	0.88482	3.1169	0.79985	-0.0071435	0.43456	2.199	2.3035	-1.0784	1.1659	2.0632	0.51504	0.36934	2.5385
1493	-60	-180	-60	2.44672	270	57.8573	77.0111	100.908	0	0	0	1.1788	0	0	1.9548	1.3049	0	0	-1.2234	-2.1189	1.6836	1.8622	-0.89711	1.6946	1.8861	0.8862	3.0148	1.0648	-0.0018081	-0.54064	-0.42564	-2.6101	1.0768	-1.2569	-2.1847	-0.53507	-2.1206	-1.8404
1494	-60	-180	-60	2.44672	116.36	51.5234	61.5922	98.4483	0	0	0	1.1753	0	0	1.9931	1.2641	0	-1.0864	1.0962	1.8986	1.7398	1.8275	-0.89829	1.7393	1.851	0.88589	3.046	0.9943	0.0014712	-0.85109	2.1462	2.019	-2.0338	0.82748	1.456	-0.59812	0.37772	2.5428
1495	-60	-180	-60	2.44672	243.64	53.9097	70.3691	95.5768	0	0	0	1.1763	0	0	1.96	1.2977	0	-1.0864	-1.0962	-1.8986	1.6918	1.8558	-0.89727	1.7026	1.8795	0.88671	3.0184	1.0512	-0.0026898	-1.5448	-0.14228	-2.1149	-0.18583	-1.388	-2.4204	-1.6502	-1.8412	-1.3565
1496	-60	-180	60	1.8	180	77.2802	77.1891	114.634	0	0	0	1.2241	0	0	1.8988	1.3921	0	-1.8	0	0	1.5926	1.9431	0.89357	2.9806	1.2484	-0.0020105	1.5894	1.9451	-0.89124	-2.2124	1.0063	0	-1.9622	-0.56234	-0.90945	-1.9622	-0.56229	0.90949
1497	-60	-180	60	1.8	90	65.4304	66.5692	99.7178	0	0	0	1.2537	0	0	2.252	1.0783	0	0	0.9	1.5588	2.265	1.7945	0.82631	3.2265	0.59716	-0.059025	2.0801	1.623	-0.93247	0.50656	1.8441	1.4392	-1.0313	1.0415	1.8821	0.51855	0.21279	2.2167
1498	-60	-180	60	1.8	270	56.6519	58.3622	98.8953	0	0	0	1.2741	0	0	1.8949	1.3491	0	0	-0.9	-1.5588	1.622	1.9595	0.87141	2.9768	1.2217	-0.016564	1.5689	1.8588	-0.90828	-0.53703	-0.18278	-2.1769	1.0355	-1.0451	-1.8273	-0.56086	-1.8287	-1.4566
1499	-60	-180	60	1.8	116.36	41.224	41.1714	85.6127	0	0	0	1.2144	0	0	2.0493	1.2271	0	-0.79923	0.80642	1.3968	1.9064	1.8981	0.85843	3.0919	0.91852	-0.040754	1.7891	1.7405	-0.92452	-0.58533	1.8637	1.5487	-1.8485	0.62206	1.194	-0.41134	0.17404	2.1895
1500	-60	-180	60	1.8	243.64	44.7944	45.5809	81.7345	0	0	0	1.2268	0	0	1.8751	1.336	0	-0.79923	-0.80642	-1.3968	1.6175	1.9548	0.86937	2.9522	1.1795	-0.020826	1.5561	1.835	-0.91429	-1.3365	0.066991	-1.7511	-0.0067263	-1.158	-2.0514	-1.4602	-1.5904	-1.037
1501	-60	-180	60	1.8	96.8508	53.81	54.1191	92.4793	0	0	0	1.236	0	0	2.1726	1.1343	0	-0.21471	0.89357	1.5477	2.1281	1.8394	0.83702	3.1765	0.71815	-0.055339	1.9626	1.6657	-0.93016	0.23847	1.8757	1.5031	-1.2817	0.95631	1.7517	0.28226	0.22237	2.2384
1502	-60	-180	60	1.8	145.558	54.1352	54.1886	94.1881	0	0	0	1.2119	0	0	2.0008	1.2935	0	-1.4845	0.50901	0.88163	1.7979	1.9274	0.87182	3.0587	1.0375	-0.025977	1.728	1.8183	-0.9153	-1.679	1.564	1.0835	-2.1867	0.063205	0.1912	-1.3121	-0.08763	1.7711
1503	-60	-180	60	1.8	214.442	61.7325	65.7295	84.836	0	0	0	1.2221	0	0	1.8483	1.3527	0	-1.4845	-0.50901	-0.88163	1.553	1.9295	0.88373	2.9292	1.2187	-0.0060621	1.5323	1.8787	-0.90217	-1.8899	0.48318	-1.0236	-1.2491	-1.0517	-1.7949	-2.018	-1.0965	-0.14297
1504	-60	-180	60	1.8	263.149	49.4519	50.3293	91.4881	0	0	0	1.2539	0	0	1.8925	1.3412	0	-0.21471	-0.89357	-1.5477	1.6357	1.9656	0.86651	2.9714	1.1946	-0.021968	1.5694	1.8401	-0.91405	-0.76793	-0.13483	-2.0966	0.79092	-1.0766	-1.9005	-0.80725	-1.796	-1.4043
1505	-60	-180	60	1.1	180	111.996	112.075	144.944	0	0	0	1.2249	0	0	1.8367	1.3807	0	-1.1	0	0	1.5223	1.9373	0.88836	2.9197	1.2651	0.0041299	1.5291	1.9335	-0.8931	-1.7537	0.9752	0	-1.5812	-0.60133	-0.83644	-1.581	-0.60119	0.83656
1506	-60	-180	60	1.1	90	166.796	198.798	187.889	0	0	0	1.6314	0	0	2.3351	1.2628	0	0	0.55	0.95263	2.1317	1.9141	0.85699	3.3972	1.013	0.022414	2.1262	1.8467	-0.90982	0.46898	1.5672	1.0899	-1.0314	0.70788	1.3917	0.52695	0.054627	1.8599
1507	-60	-180	60	1.1	270	151.587	158.71	209.668	0	0	0	1.4906	0	0	1.9828	1.3718	0	0	-0.55	-0.95263	1.6398	1.9258	0.88326	3.0741	1.3469	-0.0099159	1.6329	1.9074	-0.89331	-0.52992	0.014576	-1.8105	0.8843	-0.95766	-1.4922	-0.81178	-1.3804	-1.0287
1508	-60	-180	60	1.1	116.36	122.399	127.17	154.47	0	0	0	1.3205	0	0	2.028	1.2891	0	-0.48842	0.49281	0.85357	1.8265	1.9469	0.85409	3.093	1.0667	-0.017375	1.7652	1.8286	-0.91722	-0.28247	1.6055	1.0389	-1.603	0.47491	0.85798	-0.25385	0.096379	1.8831
1509	-60	-180	60	1.1	243.64	113.68	114.794	156.198	0	0	0	1.3008	0	0	1.889	1.3356	0	-0.48842	-0.49281	-0.85357	1.6171	1.9581	0.86555	2.9728	1.2266	-0.026378	1.5576	1.8418	-0.91303	-1.1574	0.19731	-1.459	0.12465	-1.0462	-1.6088	-1.3578	-1.1707	-0.58377
1510	-60	-180	60	1.1	96.8508	151.492	169.012	178.604	0	0	0	1.4743	0	0	2.2149	1.2505	0	-0.13121	0.54607	0.94583	2.0332	1.9107	0.8536	3.2705	0.98164	-0.00013222	1.9956	1.8244	-0.91235	0.27566	1.589	1.0869	-1.2025	0.68492	1.2623	0.29461	0.090473	1.9097
1511	-60	-180	60	1.1	145.558	113.859	114.317	141.456	0	0	0	1.2464	0	0	1.8965	1.357	0	-0.90717	0.31106	0.53877	1.6329	1.9703	0.87077	2.973	1.1974	-0.0088454	1.6062	1.8896	-0.90878	-1.1355	1.4431	0.76649	-1.8893	-0.031081	0.11319	-0.9948	-0.13567	1.5639
1512	-60	-180	60	1.1	214.442	113.259	114.24	139.589	0	0	0	1.2476	0	0	1.8438	1.348	0	-0.90717	-0.31106	-0.53877	1.5544	1.9432	0.8753	2.9273	1.2366	-0.016129	1.5141	1.8679	-0.90499	-1.6527	0.4947	-0.88876	-0.80495	-1.0186	-1.4343	-1.6479	-0.87936	0.097061
1513	-60	-180	60	1.1	263.149	136.716	140.496	193.299	0	0	0	1.41	0	0	1.9407	1.3582	0	-0.13121	-0.54607	-0.94583	1.6273	1.9442	0.87503	3.0299	1.3011	-0.018223	1.5973	1.8804	-0.90275	-0.70821	0.051843	-1.7356	0.69671	-0.98655	-1.538	-0.97845	-1.3321	-0.93736
1514	-60	-180	60	2.5	180	58.3103	82.3182	103.759	0	0	0	1.1713	0	0	1.993	1.2822	0	-2.5	0	0	1.7447	1.8526	0.89518	3.0441	1.0066	-0.0025285	1.741	1.8555	-0.89233	-3.2761	0.75704	0	-2.2409	-0.48326	-0.92911	-2.2409	-0.48322	0.92912
1515	-60	-180	60	2.5	90	57.7426	70.8578	102.292	0	0	0	1.1746	0	0	2.0826	1.1808	0	0	1.25	2.1651	1.8867	1.7715	0.89282	3.1088	0.82116	-0.013645	1.8775	1.7749	-0.89275	0.42621	2.2241	2.3757	-1.074	1.1869	2.0597	0.51112	0.38609	2.5684
1516	-60	-180	60	2.5	270	57.0219	78.1033	99.9572	0	0	0	1.1768	0	0	1.9594	1.3023	0	0	-1.25	-2.1651	1.706	1.8789	0.89074	3.0179	1.055	-0.0041639	1.6926	1.8624	-0.89654	-0.54056	-0.44904	-2.6503	1.0773	-1.2831	-2.223	-0.5383	-2.1323	-1.8492
1517	-60	-180	60	2.5	116.36	51.4382	63.0105	98.2938	0	0	0	1.1743	0	0	1.9907	1.2674	0	-1.11	1.12	1.9399	1.7472	1.8438	0.89515	3.0434	0.9962	-0.0086515	1.7338	1.8363	-0.89368	-0.87587	2.1699	2.0618	-2.0441	0.84581	1.4735	-0.61446	0.39642	2.5723
1518	-60	-180	60	2.5	243.64	53.5984	71.7001	95.4038	0	0	0	1.1751	0	0	1.9634	1.2965	0	-1.11	-1.12	-1.9399	1.7123	1.8738	0.89108	3.0206	1.0445	-0.0051219	1.6988	1.857	-0.89676	-1.5621	-0.16097	-2.1456	-0.20349	-1.4089	-2.4526	-1.6634	-1.858	-1.3782
1519	-60	-180	60	2.5	96.8508	54.3161	66.2693	100.019	0	0	0	1.1748	0	0	2.041	1.218	0	-0.29821	1.2411	2.1496	1.8216	1.801	0.89487	3.0806	0.89967	-0.012358	1.8108	1.8028	-0.8918	0.095104	2.242	2.2778	-1.3608	1.1293	1.9888	0.23052	0.42231	2.6185
1520	-60	-180	60	2.5	145.558	54.2969	69.8701	101.429	0	0	0	1.173	0	0	1.9902	1.2799	0	-2.0618	0.70696	1.2245	1.7458	1.8559	0.89362	3.0424	1.0079	-0.006078	1.734	1.8478	-0.8944	-2.2628	1.751	1.4291	-2.5234	0.23954	0.36906	-1.6649	0.081105	2.011
1521	-60	-180	60	2.5	214.442	56.1791	80.4683	95.4478	0	0	0	1.1724	0	0	1.9722	1.2921	0	-2.0618	-0.70696	-1.2245	1.7189	1.8633	0.89381	3.0274	1.0324	-0.0029067	1.7129	1.8589	-0.89431	-2.2612	0.35325	-1.2443	-1.7087	-1.2077	-2.1154	-2.3448	-1.2874	-0.35981
1522	-60	-180	60	2.5	263.149	55.1978	74.0669	98.1331	0	0	0	1.1768	0	0	1.9599	1.3006	0	-0.29821	-1.2411	-2.1496	1.7083	1.8791	0.89023	3.0181	1.0525	-0.0051547	1.693	1.8595	-0.8972	-0.83386	-0.39407	-2.5548	0.76769	-1.3252	-2.2992	-0.85513	-2.1043	-1.8143
1523	-60	-180	60	1.30503	180	52.1523	52.1842	87.501	0	0	0	1.2211	0	0	1.8484	1.3897	0	-1.305	0	0	1.5315	1.9387	0.89147	2.9319	1.2716	0.0002419	1.5319	1.9384	-0.89176	-1.8502	0.98179	0	-1.6941	-0.56509	-0.86714	-1.6941	-0.56508	0.86714
1524	-60	-180	60	1.30503	90	85.4987	95.288	109.939	0	0	0	1.3848	0	0	2.2983	1.1407	0	0	0.65251	1.1302	2.2332	1.8359	0.84073	3.3039	0.72382	-0.023329	2.1386	1.7149	-0.9225	0.48157	1.6326	1.1596	-1.036	0.8648	1.4749	0.4168	0.097678	1.9907
1525	-60	-180	60	1.30503	270	69.8885	73.7679	119.649	0	0	0	1.3747	0	0	1.943	1.351	0	0	-0.65251	-1.1302	1.6388	1.9361	0.87867	3.0303	1.2697	-0.014667	1.608	1.8786	-0.89969	-0.52935	-0.027779	-1.8818	0.93022	-0.96522	-1.6098	-0.68148	-1.5392	-1.1284
1526	-60	-180	60	1.30503	116.36	45.4882	47.155	80.5836	0	0	0	1.2752	0	0	2.0367	1.2715	0	-0.57945	0.58466	1.0127	1.874	1.9512	0.84659	3.0923	1.0092	-0.030833	1.7752	1.7898	-0.9262	-0.35824	1.6624	1.1633	-1.672	0.52611	0.93902	-0.32108	0.088241	1.9594
1527	-60	-180	60	1.30503	243.64	40.3118	41.2526	78.2668	0	0	0	1.2698	0	0	1.89	1.3289	0	-0.57945	-0.58466	-1.0127	1.6319	1.9572	0.86539	2.9707	1.1943	-0.0265	1.5634	1.8285	-0.91468	-1.201	0.16501	-1.5304	0.099061	-1.0616	-1.7369	-1.3395	-1.3296	-0.708
1528	-60	-180	60	1.30503	96.8508	69.1387	74.9732	98.6986	0	0	0	1.3408	0	0	2.205	1.1823	0	-0.15567	0.64785	1.1221	2.1141	1.879	0.83931	3.2296	0.81604	-0.031417	2.0042	1.7352	-0.92561	0.27102	1.6569	1.175	-1.2242	0.80003	1.3637	0.23056	0.11539	2.0074
1529	-60	-180	60	1.30503	145.558	47.051	47.2951	78.5028	0	0	0	1.2358	0	0	1.9218	1.3527	0	-1.0763	0.36904	0.63919	1.6744	1.975	0.8697	2.9957	1.173	-0.01543	1.6307	1.874	-0.91363	-1.2663	1.4591	0.84165	-1.9794	0.00048523	0.13512	-1.0744	-0.12811	1.6212
1530	-60	-180	60	1.30503	214.442	48.7874	50.2564	73.5748	0	0	0	1.2403	0	0	1.8455	1.352	0	-1.0763	-0.36904	-0.63919	1.5517	1.938	0.87923	2.9291	1.2366	-0.014434	1.5137	1.8717	-0.9026	-1.7173	0.48625	-0.92594	-0.89384	-0.98604	-1.5464	-1.7372	-0.98539	-0.0023018
1531	-60	-180	60	1.30503	263.149	56.3644	58.3555	104.811	0	0	0	1.3317	0	0	1.9285	1.3387	0	-0.15567	-0.64785	-1.1221	1.6522	1.9522	0.86972	3.0127	1.229	-0.022938	1.5982	1.8506	-0.90912	-0.72024	0.010588	-1.8124	0.73059	-0.9996	-1.6535	-0.87609	-1.4958	-1.05
1532	-60	-180	60	2.29497	180	64.0525	83.7341	110.078	0	0	0	1.1734	0	0	2.0012	1.2794	0	-2.295	0	0	1.7558	1.8514	0.89509	3.0511	0.9994	-0.0023094	1.7524	1.8539	-0.89249	-3.0111	0.81665	0	-2.1368	-0.53349	-0.92546	-2.1367	-0.53346	0.92548
1533	-60	-180	60	2.29497	90	62.3135	70.0122	105.11	0	0	0	1.1819	0	0	2.134	1.1325	0	0	1.1475	1.9875	1.9929	1.7543	0.88004	3.1418	0.72438	-0.024089	1.9505	1.7227	-0.90035	0.46511	2.1224	2.065	-1.0787	1.1262	2.0789	0.52708	0.32983	2.4625
1534	-60	-180	60	2.29497	270	60.4442	73.7462	103.495	0	0	0	1.1881	0	0	1.9376	1.3153	0	0	-1.1475	-1.9875	1.6821	1.9003	0.88613	3.0017	1.0919	-0.0072029	1.6579	1.8635	-0.9001	-0.54063	-0.3651	-2.5052	1.0744	-1.1883	-2.0833	-0.52689	-2.0723	-1.7895
1535	-60	-180	60	2.29497	116.36	51.569	57.4738	98.4017	0	0	0	1.1797	0	0	2.0029	1.253	0	-1.019	1.0282	1.7808	1.775	1.8437	0.89156	3.0537	0.97399	-0.013261	1.748	1.8162	-0.89768	-0.78208	2.079	1.8995	-2.0005	0.77777	1.4048	-0.55378	0.32744	2.4619
1536	-60	-180	60	2.29497	243.64	54.7028	66.165	95.7011	0	0	0	1.1817	0	0	1.9472	1.3027	0	-1.019	-1.0282	-1.7808	1.6967	1.8876	0.88744	3.0083	1.0663	-0.0081274	1.6737	1.8535	-0.90001	-1.4959	-0.090329	-2.0283	-0.13948	-1.33	-2.3334	-1.6101	-1.7906	-1.293
1537	-60	-180	60	2.29497	96.8508	56.6639	63.1477	101.26	0	0	0	1.1816	0	0	2.0769	1.184	0	-0.27376	1.1393	1.9733	1.8956	1.7925	0.88612	3.1062	0.8339	-0.020217	1.8602	1.7646	-0.89801	0.14861	2.1354	2.0225	-1.3535	1.0712	1.9669	0.25401	0.35804	2.5049
1538	-60	-180	60	2.29497	145.558	56.4667	66.1746	103.76	0	0	0	1.1773	0	0	1.9975	1.2743	0	-1.8927	0.64898	1.1241	1.7618	1.8589	0.89136	3.0491	0.99929	-0.0087493	1.7422	1.8386	-0.89694	-2.0841	1.6972	1.3236	-2.4273	0.18018	0.3124	-1.5679	0.022708	1.9439
1539	-60	-180	60	2.29497	214.442	59.6298	78.2953	96.5463	0	0	0	1.1764	0	0	1.9594	1.2972	0	-1.8927	-0.64898	-1.1241	1.7036	1.8705	0.89249	3.0177	1.0497	-0.0037346	1.6947	1.8597	-0.89554	-2.1442	0.39953	-1.1743	-1.6004	-1.1659	-2.0291	-2.2517	-1.2281	-0.28623
1540	-60	-180	60	2.29497	263.149	57.2818	68.8851	100.125	0	0	0	1.1865	0	0	1.9411	1.3104	0	-0.27376	-1.1393	-1.9733	1.6895	1.898	0.88562	3.0041	1.0823	-0.0086086	1.6629	1.8575	-0.901	-0.81527	-0.31499	-2.4189	0.78389	-1.2361	-2.1695	-0.83179	-2.0335	-1.7282
1541	-60	-180	60	1.15328	180	86.1269	86.1913	119.86	0	0	0	1.2229	0	0	1.8404	1.3835	0	-1.1533	0	0	1.5255	1.9377	0.88938	2.9235	1.2664	0.0029266	1.5303	1.935	-0.89276	-1.7766	0.97511	0	-1.6076	-0.58724	-0.84672	-1.6075	-0.58715	0.84681
1542	-60	-180	60	1.15328	90	136.514	158.591	159.314	0	0	0	1.5266	0	0	2.3134	1.2225	0	0	0.57664	0.99877	2.1611	1.8928	0.85009	3.3559	0.90441	0.0064373	2.1295	1.8068	-0.9143	0.47136	1.5785	1.1011	-1.0358	0.76328	1.4002	0.45747	0.059824	1.9008
1543	-60	-180	60	1.15328	270	120.24	126.126	175.855	0	0	0	1.4497	0	0	1.9656	1.3659	0	0	-0.57664	-0.99877	1.6338	1.9291	0.88218	3.0559	1.3242	-0.011085	1.6205	1.8997	-0.89512	-0.52853	0.0061084	-1.8203	0.89595	-0.95556	-1.5253	-0.7683	-1.4269	-1.0499
1544	-60	-180	60	1.15328	116.36	91.5712	95.0477	124.382	0	0	0	1.3039	0	0	2.032	1.2823	0	-0.51208	0.51668	0.89492	1.846	1.9493	0.85074	3.0935	1.0438	-0.022363	1.7711	1.8142	-0.92095	-0.30186	1.6162	1.0692	-1.6202	0.49039	0.87454	-0.27921	0.085409	1.8985
1545	-60	-180	60	1.15328	243.64	83.7545	84.7165	124.798	0	0	0	1.2893	0	0	1.8914	1.3316	0	-0.51208	-0.51668	-0.89492	1.6268	1.9584	0.86483	2.9739	1.2113	-0.027228	1.5624	1.8348	-0.91424	-1.1659	0.18981	-1.4735	0.11959	-1.0492	-1.6409	-1.3458	-1.2177	-0.61325
1546	-60	-180	60	1.53212	180	53.8066	53.7779	90.0085	0	0	0	1.2234	0	0	1.8585	1.3954	0	-1.5321	0	0	1.5402	1.9406	0.89303	2.9429	1.2771	-0.00192	1.537	1.9424	-0.89078	-1.9794	1.0019	0	-1.8317	-0.55438	-0.88949	-1.8317	-0.5544	0.88948
1547	-60	-180	60	1.53212	90	63.645	67.9385	92.3289	0	0	0	1.3142	0	0	2.2784	1.105	0	0	0.76606	1.3269	2.2646	1.818	0.83	3.2658	0.6487	-0.044602	2.1142	1.6616	-0.92974	0.49512	1.7262	1.2747	-1.0353	0.94706	1.645	0.46097	0.15372	2.1016
1548	-60	-180	60	1.53212	270	50.5689	53.0955	95.3953	0	0	0	1.3189	0	0	1.9208	1.3446	0	0	-0.76606	-1.3269	1.6367	1.9461	0.87481	3.0052	1.2355	-0.016353	1.5911	1.8633	-0.9039	-0.53284	-0.095035	-2.0104	0.98303	-1.0009	-1.7158	-0.61041	-1.6781	-1.2666
1549	-60	-180	60	1.53212	116.36	32.9034	33.2832	72.0118	0	0	0	1.2477	0	0	2.0385	1.2584	0	-0.68029	0.6864	1.1889	1.8904	1.9422	0.8473	3.0892	0.97774	-0.037885	1.774	1.7667	-0.92838	-0.45109	1.7493	1.3228	-1.7536	0.57047	1.0527	-0.36304	0.12103	2.0644
1550	-60	-180	60	1.53212	243.64	31.6114	32.5039	67.5144	0	0	0	1.2522	0	0	1.8774	1.3349	0	-0.68029	-0.6864	-1.1889	1.6169	1.9589	0.8669	2.9575	1.1962	-0.023437	1.5509	1.8314	-0.91443	-1.2627	0.1232	-1.6297	0.056937	-1.0957	-1.882	-1.3775	-1.4604	-0.85607
1551	-60	-180	60	2.06788	180	74.1198	85.8351	120.006	0	0	0	1.18	0	0	2.011	1.2833	0	-2.0679	0	0	1.7672	1.8571	0.8947	3.0611	1.0025	-0.0016018	1.7648	1.8589	-0.8929	-2.7829	0.82364	0	-1.9946	-0.56544	-0.91846	-1.9946	-0.56541	0.91848
1552	-60	-180	60	2.06788	90	66.7486	68.9985	105.51	0	0	0	1.2034	0	0	2.2071	1.0773	0	0	1.0339	1.7908	2.1626	1.7517	0.85264	3.1865	0.60592	-0.045002	2.042	1.6464	-0.91763	0.50295	1.9842	1.6944	-1.0454	1.1118	2.0721	0.54412	0.28	2.3458
1553	-60	-180	60	2.06788	270	62.8295	67.7241	105.05	0	0	0	1.219	0	0	1.9027	1.3376	0	0	-1.0339	-1.7908	1.6404	1.9375	0.8775	2.9766	1.1617	-0.012158	1.599	1.8634	-0.90599	-0.53939	-0.28267	-2.3581	1.0655	-1.1036	-1.9481	-0.5273	-1.9733	-1.6579
1554	-60	-180	60	2.06788	116.36	49.563	50.539	95.8422	0	0	0	1.1918	0	0	2.0293	1.229	0	-0.91817	0.92643	1.6046	1.8375	1.8514	0.88153	3.0752	0.93138	-0.023852	1.7773	1.7762	-0.90778	-0.69384	1.9801	1.7411	-1.9381	0.7045	1.3192	-0.48868	0.25612	2.3402
1555	-60	-180	60	2.06788	243.64	54.0037	58.3081	93.3879	0	0	0	1.1974	0	0	1.9158	1.3158	0	-0.91817	-0.92643	-1.6046	1.6642	1.9155	0.88008	2.984	1.1116	-0.013607	1.624	1.8462	-0.90631	-1.4225	-0.015324	-1.8997	-0.077165	-1.2464	-2.208	-1.5443	-1.7057	-1.1878
1556	-60	-180	60	2.44672	180	59.5379	82.6382	105.125	0	0	0	1.1717	0	0	1.9948	1.2815	0	-2.4467	0	0	1.7472	1.8523	0.89516	3.0456	1.0049	-0.002484	1.7436	1.855	-0.89237	-3.196	0.78409	0	-2.2183	-0.50026	-0.92845	-2.2183	-0.50021	0.92847
1557	-60	-180	60	2.44672	90	58.8337	70.5831	103.152	0	0	0	1.1758	0	0	2.0942	1.1694	0	0	1.2234	2.1189	1.9095	1.7665	0.8904	3.1165	0.7988	-0.015684	1.8943	1.7633	-0.8941	0.4354	2.1991	2.3008	-1.0785	1.1664	2.0636	0.51479	0.3697	2.5396
1558	-60	-180	60	2.44672	270	57.8592	77.0186	100.887	0	0	0	1.1789	0	0	1.9549	1.305	0	0	-1.2234	-2.1189	1.7011	1.8833	0.8898	3.0145	1.0625	-0.0048089	1.6854	1.8627	-0.89728	-0.54065	-0.42557	-2.61	1.0768	-1.257	-2.1848	-0.53509	-2.1206	-1.8404
1559	-60	-180	60	2.44672	116.36	51.5323	61.6383	98.4341	0	0	0	1.1753	0	0	1.9932	1.2643	0	-1.0864	1.0962	1.8986	1.7528	1.8435	0.89449	3.0455	0.99151	-0.0095707	1.7368	1.8321	-0.89443	-0.84978	2.1461	2.0173	-2.0341	0.82777	1.4564	-0.59839	0.37797	2.5433
1560	-60	-180	60	2.44672	243.64	53.9116	70.3789	95.5557	0	0	0	1.1764	0	0	1.9601	1.2978	0	-1.0864	-1.0962	-1.8986	1.7091	1.8766	0.89034	3.0181	1.0489	-0.005746	1.6937	1.8563	-0.89743	-1.5448	-0.14227	-2.1148	-0.18585	-1.3881	-2.4204	-1.6502	-1.8412	-1.3565
1561	-60	-180	-140	1.8	180	76.4284	76.3336	116.134	0	0	0	1.2246	0	0	1.9135	1.3686	0	-1.8	0	0	2.7765	1.312	-0.66818	1.2269	2.1695	-0.29218	2.2842	1.5402	1.0158	-2.209	1.0074	0	-1.9644	-0.56224	-0.90915	-1.9632	-0.56142	0.90975
1562	-60	-180	-140	1.8	90	62.9083	64.8587	99.9861	0	0	0	1.2598	0	0	2.1565	1.1659	0	0	0.9	1.5588	2.9709	0.90459	-0.67537	1.6511	2.0765	-0.33427	2.6099	1.3354	0.98293	0.50651	1.847	1.4445	-1.0368	1.0332	1.865	0.51521	0.2095	2.2161
1563	-60	-180	-140	1.8	270	57.1976	58.8983	100.709	0	0	0	1.2734	0	0	1.9063	1.345	0	0	-0.9	-1.5588	2.76	1.2699	-0.67504	1.2051	2.1154	-0.32394	2.3045	1.61	0.98835	-0.53719	-0.18025	-2.1731	1.0355	-1.0433	-1.8292	-0.55891	-1.8304	-1.4602
1564	-60	-180	-140	1.8	116.36	41.9676	41.935	86.4254	0	0	0	1.2162	0	0	2.0253	1.252	0	-0.79923	0.80642	1.3968	2.8579	1.0614	-0.67361	1.4154	2.0865	-0.34845	2.4382	1.4968	0.98684	-0.57721	1.8642	1.538	-1.8494	0.62307	1.1993	-0.40287	0.17549	2.1859
1565	-60	-180	-140	1.8	243.64	45.3084	46.1737	83.0787	0	0	0	1.2276	0	0	1.8797	1.3355	0	-0.79923	-0.80642	-1.3968	2.7298	1.2432	-0.67496	1.179	2.1033	-0.32881	2.2724	1.6019	0.98902	-1.3351	0.068403	-1.7487	-0.0054453	-1.1553	-2.0512	-1.4604	-1.5924	-1.0415
1566	-60	-180	-140	1.8	96.8508	52.6951	53.4749	92.9095	0	0	0	1.2412	0	0	2.0943	1.2038	0	-0.21471	0.89357	1.5477	2.9186	0.97724	-0.6743	1.5383	2.08	-0.3414	2.5307	1.4112	0.98445	0.24158	1.8755	1.4951	-1.2832	0.95397	1.7411	0.28226	0.22104	2.237
1567	-60	-180	-140	1.8	145.558	54.4626	54.5579	94.9306	0	0	0	1.2119	0	0	2.0026	1.2931	0	-1.4845	0.50901	0.88163	2.8428	1.1298	-0.673	1.3793	2.1241	-0.33493	2.4019	1.5122	0.99669	-1.678	1.5645	1.083	-2.1897	0.060612	0.19596	-1.3032	-0.085447	1.7705
1568	-60	-180	-140	1.8	214.442	61.8674	65.515	86.0316	0	0	0	1.2217	0	0	1.8615	1.3442	0	-1.4845	-0.50901	-0.88163	2.7187	1.2836	-0.67132	1.1546	2.1149	-0.31277	2.2367	1.5738	1.0033	-1.8876	0.48396	-1.0222	-1.243	-1.0484	-1.7952	-2.0235	-1.0996	-0.14921
1569	-60	-180	-140	1.8	263.149	50.0644	51.0253	93.1153	0	0	0	1.2543	0	0	1.898	1.3408	0	-0.21471	-0.89357	-1.5477	2.7488	1.2519	-0.67581	1.1981	2.1093	-0.32962	2.2972	1.6144	0.98544	-0.76752	-0.1326	-2.0931	0.79024	-1.0758	-1.9031	-0.80624	-1.7971	-1.4065
1570	-60	-180	-140	1.1	180	111.269	111.343	146.385	0	0	0	1.2243	0	0	1.852	1.3643	0	-1.1	0	0	2.7146	1.3333	-0.6684	1.1576	2.1575	-0.29307	2.2251	1.554	1.0117	-1.7535	0.97616	0	-1.5763	-0.59518	-0.841	-1.5861	-0.60389	0.83316
1571	-60	-180	-140	1.1	90	164.022	187.805	193.647	0	0	0	1.5759	0	0	2.2642	1.2742	0	0	0.55	0.95263	3.114	1.1456	-0.67867	1.6739	2.1401	-0.3292	2.6872	1.4827	0.98944	0.47284	1.5681	1.0781	-1.0372	0.74548	1.3675	0.47102	0.048404	1.8777
1572	-60	-180	-140	1.1	270	153.267	161.127	210.841	0	0	0	1.4903	0	0	2.0194	1.3657	0	0	-0.55	-0.95263	2.8826	1.382	-0.67049	1.2911	2.1167	-0.31535	2.3793	1.6313	1.0045	-0.52825	0.009177	-1.814	0.88291	-0.96823	-1.4857	-0.81353	-1.3808	-1.0242
1573	-60	-180	-140	1.1	116.36	121.333	125.508	157.163	0	0	0	1.3184	0	0	1.9992	1.3021	0	-0.48842	0.49281	0.85357	2.8509	1.1983	-0.67363	1.3566	2.1269	-0.32558	2.4053	1.5536	0.98936	-0.27483	1.6123	1.0316	-1.6024	0.47866	0.8603	-0.24579	0.10566	1.8833
1574	-60	-180	-140	1.1	243.64	115.064	116.375	157.42	0	0	0	1.3019	0	0	1.9075	1.3339	0	-0.48842	-0.49281	-0.85357	2.7608	1.2643	-0.6761	1.204	2.0974	-0.33933	2.3001	1.6374	0.9821	-1.1596	0.19073	-1.4647	0.12389	-1.0517	-1.605	-1.3565	-1.1723	-0.57924
1575	-60	-180	-140	1.1	96.8508	148.683	162.976	183.774	0	0	0	1.455	0	0	2.1608	1.2683	0	-0.13121	0.54607	0.94583	3.0098	1.1362	-0.67639	1.5657	2.1326	-0.32155	2.5831	1.477	0.99061	0.28154	1.5932	1.0767	-1.2029	0.70467	1.2527	0.27868	0.089508	1.9118
1576	-60	-180	-140	1.1	145.558	113.613	113.9	143.056	0	0	0	1.2443	0	0	1.8935	1.3565	0	-0.90717	0.31106	0.53877	2.7488	1.2884	-0.672	1.2189	2.1579	-0.31055	2.2831	1.5859	1	-1.1357	1.447	0.76691	-1.8886	-0.033398	0.11563	-0.99136	-0.13313	1.5639
1577	-60	-180	-140	1.1	214.442	113.511	114.184	141.247	0	0	0	1.2461	0	0	1.8568	1.3413	0	-0.90717	-0.31106	-0.53877	2.7116	1.2758	-0.67554	1.1504	2.11	-0.32365	2.2474	1.6058	0.9911	-1.6591	0.4869	-0.89304	-0.8016	-1.0278	-1.4257	-1.6421	-0.88687	0.098958
1578	-60	-180	-140	1.1	263.149	138.376	142.647	194.544	0	0	0	1.4105	0	0	1.9723	1.3531	0	-0.13121	-0.54607	-0.94583	2.8322	1.3319	-0.67325	1.2566	2.1119	-0.32495	2.349	1.636	0.99414	-0.70722	0.045297	-1.7405	0.69623	-0.99404	-1.533	-0.97828	-1.3338	-0.93238
1579	-60	-180	-140	2.5	180	57.6111	81.5869	106.334	0	0	0	1.172	0	0	1.9964	1.2696	0	-2.5	0	0	2.8422	1.1132	-0.66675	1.3897	2.123	-0.30543	2.3673	1.4027	1.0169	-3.2854	0.74755	0	-2.2379	-0.48268	-0.92855	-2.2343	-0.47843	0.92967
1580	-60	-180	-140	2.5	90	56.1865	71.0212	104.333	0	0	0	1.1758	0	0	2.0571	1.2019	0	0	1.25	2.1651	2.8918	0.99364	-0.66815	1.5036	2.0931	-0.30009	2.4489	1.3145	1.0108	0.49166	2.213	2.1298	-1.0805	1.2244	2.1648	0.52657	0.41656	2.6095
1581	-60	-180	-140	2.5	270	56.401	77.9469	102.403	0	0	0	1.1773	0	0	1.965	1.2892	0	0	-1.25	-2.1651	2.8142	1.1527	-0.66772	1.3385	2.128	-0.30618	2.3394	1.4408	1.0136	-0.54055	-0.44309	-2.64	1.0769	-1.2871	-2.2314	-0.53938	-2.1313	-1.8483
1582	-60	-180	-140	2.5	116.36	51.1619	63.6355	100.6	0	0	0	1.1748	0	0	1.9957	1.2595	0	-1.11	1.12	1.9399	2.8407	1.0998	-0.66719	1.3876	2.1104	-0.30978	2.3698	1.4078	1.0148	-0.85409	2.1677	2.0319	-2.0533	0.84919	1.4902	-0.60742	0.39904	2.5694
1583	-60	-180	-140	2.5	243.64	53.0204	71.6007	97.57	0	0	0	1.1757	0	0	1.9688	1.2842	0	-1.11	-1.12	-1.9399	2.817	1.1436	-0.66757	1.3445	2.1243	-0.3074	2.3426	1.4364	1.0138	-1.5589	-0.15842	-2.1402	-0.20453	-1.4089	-2.4544	-1.665	-1.859	-1.3811
1584	-60	-180	-140	2.5	96.8508	53.4401	66.9507	102.21	0	0	0	1.1757	0	0	2.0232	1.2313	0	-0.29821	1.2411	2.1496	2.8644	1.0508	-0.66729	1.4396	2.1008	-0.30579	2.4037	1.3639	1.014	0.15352	2.2234	2.109	-1.3715	1.1605	2.0565	0.23601	0.44104	2.6431
1585	-60	-180	-140	2.5	145.558	53.777	69.8093	103.676	0	0	0	1.1736	0	0	1.9961	1.2673	0	-2.0618	0.70696	1.2245	2.8409	1.1079	-0.66741	1.3882	2.1187	-0.30875	2.3701	1.4104	1.0149	-2.2686	1.7492	1.4322	-2.5258	0.23713	0.3717	-1.6523	0.083523	2.0063
1586	-60	-180	-140	2.5	214.442	55.5431	80.2249	97.6482	0	0	0	1.1731	0	0	1.9778	1.2787	0	-2.0618	-0.70696	-1.2245	2.8257	1.1341	-0.66683	1.3599	2.1243	-0.30534	2.3486	1.4202	1.0161	-2.2617	0.3531	-1.2446	-1.6967	-1.2056	-2.1117	-2.3496	-1.2887	-0.36228
1587	-60	-180	-140	2.5	263.149	54.6121	73.9804	100.453	0	0	0	1.1773	0	0	1.9652	1.2883	0	-0.29821	-1.2411	-2.1496	2.8139	1.1507	-0.66782	1.3384	2.1266	-0.30711	2.3401	1.4424	1.0132	-0.83238	-0.38873	-2.5451	0.76637	-1.3289	-2.3071	-0.8564	-2.1036	-1.8146
1588	-60	-180	-140	1.30503	180	51.2852	51.313	89.1936	0	0	0	1.221	0	0	1.8662	1.3683	0	-1.305	0	0	2.729	1.33	-0.66848	1.1703	2.1621	-0.28817	2.2393	1.5453	1.0139	-1.8501	0.98193	0	-1.6907	-0.56169	-0.87021	-1.6984	-0.56747	0.86409
1589	-60	-180	-140	1.30503	90	81.8473	91.4662	112.952	0	0	0	1.385	0	0	2.2225	1.1922	0	0	0.65251	1.1302	3.0505	0.96782	-0.67666	1.7123	2.1069	-0.3249	2.6657	1.3567	0.98879	0.48329	1.6363	1.16	-1.0349	0.86873	1.4746	0.42101	0.095363	1.9871
1590	-60	-180	-140	1.30503	270	71.1665	75.2689	120.996	0	0	0	1.3732	0	0	1.9709	1.3437	0	0	-0.65251	-1.1302	2.8302	1.3026	-0.67276	1.2676	2.1162	-0.31672	2.359	1.6048	0.99507	-0.52832	-0.031098	-1.884	0.93068	-0.96758	-1.6081	-0.67928	-1.5415	-1.1265
1591	-60	-180	-140	1.30503	116.36	45.1573	46.8905	81.913	0	0	0	1.2758	0	0	2.0027	1.2931	0	-0.57945	0.58466	1.0127	2.8463	1.1521	-0.67499	1.3749	2.1207	-0.34068	2.4177	1.5511	0.98392	-0.35444	1.6655	1.1595	-1.672	0.52631	0.94265	-0.31227	0.092922	1.9594
1592	-60	-180	-140	1.30503	243.64	41.4376	42.4952	79.4848	0	0	0	1.2707	0	0	1.9017	1.3288	0	-0.57945	-0.58466	-1.0127	2.7521	1.2399	-0.67655	1.2013	2.0949	-0.33574	2.3019	1.6228	0.98123	-1.2024	0.16095	-1.5339	0.099205	-1.0636	-1.7351	-1.3379	-1.3317	-0.70728
1593	-60	-180	-140	1.30503	96.8508	66.5812	72.7227	101.076	0	0	0	1.3431	0	0	2.1383	1.2266	0	-0.15567	0.64785	1.1221	2.9736	1.0344	-0.67584	1.5834	2.112	-0.32892	2.5738	1.4248	0.98732	0.2731	1.6606	1.1738	-1.2232	0.80043	1.3653	0.23915	0.11578	2.0043
1594	-60	-180	-140	1.30503	145.558	47.0092	47.1562	79.9137	0	0	0	1.2342	0	0	1.9218	1.3509	0	-1.0763	0.36904	0.63919	2.7735	1.2559	-0.67309	1.2591	2.1591	-0.31828	2.3172	1.5774	0.99831	-1.2677	1.4602	0.84254	-1.9799	-0.0017788	0.1381	-1.0694	-0.12701	1.6213
1595	-60	-180	-140	1.30503	214.442	48.9199	49.9419	75.3214	0	0	0	1.2389	0	0	1.8592	1.3438	0	-1.0763	-0.36904	-0.63919	2.7145	1.2769	-0.67512	1.1491	2.1111	-0.31679	2.2489	1.5944	0.99452	-1.7226	0.48132	-0.92938	-0.88631	-0.98665	-1.5436	-1.7359	-0.9924	-0.0066778
1596	-60	-180	-140	1.30503	263.149	57.6821	59.9277	106.106	0	0	0	1.332	0	0	1.9492	1.3352	0	-0.15567	-0.64785	-1.1221	2.8041	1.2675	-0.67498	1.251	2.1074	-0.32732	2.3463	1.6158	0.98664	-0.71964	0.006485	-1.8155	0.73086	-1.0018	-1.6521	-0.87361	-1.4984	-1.0478
1597	-60	-180	-140	2.29497	180	63.3705	83.0495	112.647	0	0	0	1.174	0	0	2.0049	1.2666	0	-2.295	0	0	2.8501	1.1065	-0.66675	1.4027	2.1232	-0.30583	2.3765	1.3987	1.0168	-3.0176	0.81107	0	-2.1352	-0.53418	-0.92477	-2.1318	-0.53057	0.92621
1598	-60	-180	-140	2.29497	90	60.0623	69.2272	106.295	0	0	0	1.1834	0	0	2.0888	1.174	0	0	1.1475	1.9875	2.915	0.93845	-0.66961	1.5616	2.0795	-0.30559	2.4967	1.2874	1.0051	0.50546	2.0976	1.8822	-1.0713	1.1759	2.1391	0.53609	0.34915	2.4834
1599	-60	-180	-140	2.29497	270	59.97	73.8124	105.603	0	0	0	1.1881	0	0	1.9442	1.3036	0	0	-1.1475	-1.9875	2.7952	1.1821	-0.66885	1.3007	2.1286	-0.30889	2.323	1.4764	1.0097	-0.54076	-0.35982	-2.4965	1.074	-1.1903	-2.0893	-0.52775	-2.0723	-1.7919
1600	-60	-180	-140	2.29497	116.36	51.501	58.2238	100.386	0	0	0	1.1801	0	0	2.0047	1.2505	0	-1.019	1.0282	1.7808	2.8474	1.0826	-0.66793	1.4006	2.1021	-0.31564	2.3854	1.4119	1.0114	-0.76459	2.0773	1.8754	-2.0062	0.78132	1.4179	-0.54533	0.32947	2.4577
1601	-60	-180	-140	2.29497	243.64	54.266	66.2585	97.5011	0	0	0	1.1821	0	0	1.9533	1.292	0	-1.019	-1.0282	-1.7808	2.8027	1.1609	-0.66834	1.3167	2.1219	-0.30999	2.3305	1.4613	1.0106	-1.4931	-0.08782	-2.0235	-0.13972	-1.3291	-2.3343	-1.6117	-1.7915	-1.2964
1602	-60	-180	-140	2.29497	96.8508	55.5297	63.385	102.893	0	0	0	1.1827	0	0	2.044	1.2126	0	-0.27376	1.1393	1.9733	2.8802	1.0144	-0.66838	1.4753	2.0902	-0.31137	2.4365	1.3524	1.0093	0.18747	2.116	1.9023	-1.3543	1.1037	2.0054	0.25901	0.36963	2.5157
1603	-60	-180	-140	2.29497	145.558	56.0787	66.2582	105.701	0	0	0	1.1777	0	0	2.0039	1.263	0	-1.8927	0.64898	1.1241	2.8471	1.0977	-0.66805	1.3993	2.1154	-0.3128	2.3822	1.4146	1.0127	-2.0875	1.6963	1.3254	-2.4301	0.17737	0.31588	-1.5563	0.024644	1.9406
1604	-60	-180	-140	2.29497	214.442	59.0684	78.1407	98.4524	0	0	0	1.1769	0	0	1.9661	1.2843	0	-1.8927	-0.64898	-1.1241	2.8157	1.149	-0.66688	1.3393	2.1234	-0.30552	2.3377	1.4344	1.015	-2.1433	0.39969	-1.1737	-1.5927	-1.1638	-2.0277	-2.2565	-1.2299	-0.28949
1605	-60	-180	-140	2.29497	263.149	56.8567	69.0257	102.098	0	0	0	1.1867	0	0	1.947	1.2998	0	-0.27376	-1.1393	-1.9733	2.7971	1.1742	-0.66892	1.3053	2.1256	-0.31023	2.3263	1.4745	1.0092	-0.81416	-0.31005	-2.4105	0.78273	-1.2382	-2.1754	-0.83314	-2.0332	-1.7302
1606	-60	-180	-140	1.15328	180	85.3509	85.4106	121.39	0	0	0	1.2225	0	0	1.8566	1.3655	0	-1.1533	0	0	2.7192	1.3314	-0.66846	1.1625	2.1596	-0.29133	2.2299	1.5504	1.0125	-1.7765	0.97567	0	-1.6028	-0.58173	-0.85123	-1.6127	-0.59033	0.84288
1607	-60	-180	-140	1.15328	90	133.009	150.788	163.927	0	0	0	1.4978	0	0	2.2442	1.2443	0	0	0.57664	0.99877	3.087	1.0786	-0.67792	1.686	2.1321	-0.32504	2.6758	1.4327	0.98959	0.47503	1.582	1.0945	-1.0372	0.78879	1.3867	0.4337	0.057914	1.9076
1608	-60	-180	-140	1.15328	270	121.826	128.264	177.072	0	0	0	1.4487	0	0	1.9999	1.3591	0	0	-0.57664	-0.99877	2.8623	1.3575	-0.6711	1.2802	2.1182	-0.31457	2.3696	1.622	1.0016	-0.52695	0.0010254	-1.8236	0.89542	-0.96351	-1.5203	-0.76853	-1.4282	-1.0459
1609	-60	-180	-140	1.15328	116.36	90.7015	93.9043	126.533	0	0	0	1.303	0	0	2.0006	1.2984	0	-0.51208	0.51668	0.89492	2.8495	1.181	-0.67415	1.3641	2.1252	-0.33053	2.4103	1.5521	0.98728	-0.29583	1.6217	1.0634	-1.6197	0.49245	0.8778	-0.26977	0.093499	1.8992
1610	-60	-180	-140	1.15328	243.64	85.0818	86.2173	126.01	0	0	0	1.2904	0	0	1.9073	1.3307	0	-0.51208	-0.51668	-0.89492	2.7593	1.2521	-0.67634	1.2062	2.0958	-0.33894	2.3035	1.6323	0.98115	-1.1679	0.1837	-1.4786	0.11907	-1.0539	-1.6377	-1.3442	-1.2196	-0.60971
1611	-60	-180	-140	1.53212	180	52.8858	52.8533	91.8318	0	0	0	1.2235	0	0	1.8769	1.3714	0	-1.5321	0	0	2.7403	1.3318	-0.66842	1.1774	2.1627	-0.28716	2.2488	1.5456	1.0151	-1.9789	1.0021	0	-1.8303	-0.55296	-0.89071	-1.8342	-0.55525	0.88817
1612	-60	-180	-140	1.53212	90	60.5673	65.5948	93.6788	0	0	0	1.3188	0	0	2.1918	1.1761	0	0	0.76606	1.3269	3.0116	0.92835	-0.67627	1.6923	2.0932	-0.33037	2.6433	1.3415	0.98532	0.49503	1.7297	1.2812	-1.0366	0.94351	1.6407	0.46261	0.14971	2.0979
1613	-60	-180	-140	1.53212	270	51.4798	54.0137	97.0211	0	0	0	1.3178	0	0	1.9403	1.3386	0	0	-0.76606	-1.3269	2.7961	1.2728	-0.67441	1.2416	2.1131	-0.32039	2.3393	1.6032	0.98952	-0.53255	-0.095322	-2.0099	0.98342	-0.99976	-1.7163	-0.60779	-1.6802	-1.2677
1614	-60	-180	-140	1.53212	116.36	33.1847	33.7074	72.7081	0	0	0	1.2492	0	0	2.0066	1.2834	0	-0.68029	0.6864	1.1889	2.8451	1.1211	-0.67516	1.3835	2.1096	-0.34886	2.4236	1.5445	0.9822	-0.44717	1.7508	1.3181	-1.7539	0.57039	1.0561	-0.35559	0.12331	2.063
1615	-60	-180	-140	1.53212	243.64	32.4512	33.3789	68.8385	0	0	0	1.2529	0	0	1.8854	1.3349	0	-0.68029	-0.6864	-1.1889	2.7355	1.2461	-0.67651	1.1798	2.0971	-0.33213	2.2845	1.6207	0.98304	-1.2627	0.12225	-1.6302	0.057858	-1.0947	-1.8815	-1.3767	-1.4626	-0.85866
1616	-60	-180	-140	2.06788	180	73.4571	85.1846	122.456	0	0	0	1.1805	0	0	2.0156	1.2698	0	-2.0679	0	0	2.861	1.1087	-0.66692	1.4167	2.1289	-0.30587	2.3886	1.402	1.0166	-2.7857	0.8213	0	-1.9945	-0.5669	-0.91751	-1.9913	-0.56294	0.91962
1617	-60	-180	-140	2.06788	90	64.1335	67.4686	106.492	0	0	0	1.2052	0	0	2.1263	1.1519	0	0	1.0339	1.7908	2.942	0.88926	-0.6722	1.6216	2.0662	-0.31977	2.5579	1.2852	0.99465	0.51148	1.975	1.649	-1.0457	1.1241	2.0658	0.54126	0.28026	2.348
1618	-60	-180	-140	2.06788	270	62.769	68.0458	106.788	0	0	0	1.2183	0	0	1.9107	1.3296	0	0	-1.0339	-1.7908	2.7639	1.2351	-0.67158	1.2347	2.1253	-0.31653	2.2973	1.5482	1.0003	-0.53967	-0.27815	-2.3512	1.0652	-1.1036	-1.9525	-0.52688	-1.9741	-1.6618
1619	-60	-180	-140	2.06788	116.36	49.9269	51.3723	97.3823	0	0	0	1.1924	0	0	2.0223	1.2382	0	-0.91817	0.92643	1.6046	2.86	1.0544	-0.66974	1.423	2.0882	-0.32866	2.4163	1.4294	1.0032	-0.68061	1.9794	1.7233	-1.941	0.70679	1.3282	-0.47869	0.25735	2.3349
1620	-60	-180	-140	2.06788	243.64	53.9285	58.6556	94.8116	0	0	0	1.1976	0	0	1.9221	1.3091	0	-0.91817	-0.92643	-1.6046	2.7728	1.1961	-0.67042	1.2596	2.1156	-0.31697	2.3054	1.5159	1.0033	-1.4202	-0.012941	-1.8956	-0.076483	-1.2444	-2.208	-1.5454	-1.7069	-1.1917
1621	-60	-180	-140	2.44672	180	58.8431	81.9152	107.728	0	0	0	1.1724	0	0	1.9983	1.2688	0	-2.4467	0	0	2.844	1.1115	-0.66675	1.3926	2.123	-0.30554	2.3693	1.4017	1.0169	-3.2051	0.7754	0	-2.2156	-0.50003	-0.92786	-2.212	-0.49611	0.92903
1622	-60	-180	-140	2.44672	90	57.1019	70.518	104.926	0	0	0	1.1771	0	0	2.0646	1.1947	0	0	1.2234	2.1189	2.8974	0.97987	-0.66845	1.5177	2.0898	-0.30096	2.4602	1.3067	1.0096	0.49602	2.183	2.0629	-1.0802	1.2109	2.1611	0.52917	0.39886	2.5771
1623	-60	-180	-140	2.44672	270	57.2638	76.9166	103.266	0	0	0	1.1792	0	0	1.9607	1.2921	0	0	-1.2234	-2.1189	2.8103	1.1587	-0.66794	1.3308	2.1283	-0.30663	2.336	1.4478	1.0129	-0.54066	-0.41995	-2.6003	1.0764	-1.2605	-2.1924	-0.53627	-2.1198	-1.8403
1624	-60	-180	-140	2.44672	116.36	51.2983	62.2998	100.645	0	0	0	1.1759	0	0	1.9975	1.2575	0	-1.0864	1.0962	1.8986	2.8421	1.0961	-0.66733	1.3903	2.1086	-0.31095	2.373	1.4084	1.0141	-0.82907	2.1439	1.9888	-2.0423	0.83137	1.4722	-0.59105	0.38047	2.5401
1625	-60	-180	-140	2.44672	243.64	53.3599	70.324	97.6328	0	0	0	1.1769	0	0	1.9656	1.2858	0	-1.0864	-1.0962	-1.8986	2.8141	1.1472	-0.66771	1.3388	2.1239	-0.30787	2.3401	1.4414	1.0132	-1.5417	-0.13975	-2.1097	-0.18668	-1.3879	-2.4219	-1.6519	-1.8422	-1.3595
1626	-60	-180	-100	1.8	180	76.5034	76.4076	115.979	0	0	0	1.2245	0	0	1.9116	1.3715	0	-1.8	0	0	2.2186	1.5787	-1.0301	1.2353	2.1582	0.34951	2.8045	1.3056	0.62599	-2.2094	1.0072	0	-1.963	-0.56143	-0.90979	-1.9642	-0.56234	0.90912
1627	-60	-180	-100	1.8	90	63.8437	64.8138	102.882	0	0	0	1.2548	0	0	2.2144	1.1048	0	0	0.9	1.5588	2.5205	1.1757	-1.0473	1.8518	2.0907	0.30649	3.0875	0.82388	0.59137	0.49978	1.8509	1.4745	-1.0355	1.0286	1.8744	0.51167	0.20009	2.2084
1628	-60	-180	-100	1.8	270	55.2159	56.0571	102.256	0	0	0	1.2707	0	0	1.8817	1.3457	0	0	-0.9	-1.5588	2.159	1.5102	-1.0458	1.1916	2.1331	0.32358	2.8002	1.3584	0.59191	-0.53804	-0.17462	-2.1663	1.0365	-1.0395	-1.8263	-0.55936	-1.8317	-1.4733
1629	-60	-180	-100	1.8	116.36	40.2471	40.1866	87.9565	0	0	0	1.2153	0	0	2.0317	1.232	0	-0.79923	0.80642	1.3968	2.3258	1.3424	-1.0441	1.489	2.1202	0.34494	2.9404	1.0912	0.58938	-0.5928	1.8638	1.5587	-1.8473	0.61754	1.1923	-0.40611	0.16955	2.1827
1630	-60	-180	-100	1.8	243.64	43.2763	43.5565	84.7824	0	0	0	1.2259	0	0	1.8547	1.3369	0	-0.79923	-0.80642	-1.3968	2.1312	1.4919	-1.0447	1.1699	2.1253	0.33201	2.7695	1.3337	0.59634	-1.3305	0.074776	-1.74	-0.0068273	-1.1537	-2.054	-1.4659	-1.5925	-1.0516
1631	-60	-180	-100	1.8	96.8508	52.5881	52.7791	95.4313	0	0	0	1.2367	0	0	2.1415	1.1519	0	-0.21471	0.89357	1.5477	2.4425	1.2364	-1.0463	1.7079	2.1034	0.32327	3.0331	0.92556	0.58802	0.2289	1.8808	1.5332	-1.2835	0.94429	1.7475	0.2812	0.21133	2.2276
1632	-60	-180	-100	1.8	145.558	53.1531	53.0876	96.6189	0	0	0	1.211	0	0	1.9974	1.2874	0	-1.4845	0.50901	0.88163	2.2933	1.4194	-1.0416	1.4112	2.1466	0.34497	2.9021	1.1716	0.60033	-1.6945	1.5599	1.0919	-2.1832	0.058149	0.19116	-1.2997	-0.091062	1.766
1633	-60	-180	-100	1.8	214.442	60.6382	63.4599	87.2468	0	0	0	1.2215	0	0	1.8456	1.3454	0	-1.4845	-0.50901	-0.88163	2.1367	1.5393	-1.0353	1.1471	2.1143	0.34613	2.7475	1.3253	0.61446	-1.88	0.48757	-1.0176	-1.2522	-1.0499	-1.7969	-2.026	-1.0957	-0.14776
1634	-60	-180	-100	1.8	263.149	47.9254	48.2508	94.8043	0	0	0	1.2515	0	0	1.8731	1.3409	0	-0.21471	-0.89357	-1.5477	2.1472	1.4934	-1.0472	1.1902	2.1342	0.32514	2.7928	1.348	0.58965	-0.76719	-0.12669	-2.0856	0.79197	-1.0716	-1.9003	-0.80718	-1.7988	-1.4208
1635	-60	-180	-100	1.1	180	111.342	111.415	146.203	0	0	0	1.2243	0	0	1.85	1.3665	0	-1.1	0	0	2.153	1.5929	-1.0274	1.1691	2.1453	0.3572	2.7471	1.3238	0.61956	-1.7535	0.97601	0	-1.5866	-0.60447	-0.83276	-1.5758	-0.59501	0.84128
1636	-60	-180	-100	1.1	90	166.16	193.424	191.15	0	0	0	1.6151	0	0	2.3466	1.2421	0	0	0.55	0.95263	2.6726	1.4368	-1.0331	1.8167	2.1436	0.33668	3.2351	1.1117	0.62222	0.46646	1.5674	1.0989	-1.0391	0.73021	1.3677	0.47784	0.040948	1.8756
1637	-60	-180	-100	1.1	270	152.034	158.033	212.237	0	0	0	1.4803	0	0	1.996	1.3652	0	0	-0.55	-0.95263	2.2835	1.6112	-1.0325	1.2774	2.1049	0.36184	2.9173	1.4051	0.59132	-0.52888	0.014186	-1.8075	0.88232	-0.9566	-1.4946	-0.8113	-1.3831	-1.0269
1638	-60	-180	-100	1.1	116.36	121.817	125.709	156.448	0	0	0	1.3195	0	0	2.0411	1.2752	0	-0.48842	0.49281	0.85357	2.3473	1.4443	-1.0387	1.4839	2.1507	0.34973	2.949	1.1707	0.59733	-0.28901	1.6056	1.0477	-1.6036	0.47939	0.84833	-0.26943	0.083809	1.8798
1639	-60	-180	-100	1.1	243.64	113.07	113.779	158.862	0	0	0	1.2976	0	0	1.8873	1.3316	0	-0.48842	-0.49281	-0.85357	2.166	1.5054	-1.0461	1.202	2.1171	0.33831	2.8141	1.3579	0.58158	-1.1565	0.19316	-1.4596	0.12506	-1.05	-1.6059	-1.3547	-1.1734	-0.57958
1640	-60	-180	-100	1.1	96.8508	150.715	165.455	181.609	0	0	0	1.4653	0	0	2.2277	1.2308	0	-0.13121	0.54607	0.94583	2.5494	1.4029	-1.037	1.7169	2.1409	0.33616	3.1197	1.0824	0.61136	0.27203	1.5896	1.0968	-1.2064	0.69946	1.2457	0.2622	0.077559	1.9148
1641	-60	-180	-100	1.1	145.558	112.973	113.156	143.384	0	0	0	1.2447	0	0	1.8956	1.352	0	-0.90717	0.31106	0.53877	2.1893	1.5409	-1.0359	1.26	2.17	0.35334	2.8066	1.2972	0.59916	-1.1435	1.4424	0.77093	-1.8873	-0.028713	0.10597	-1.0028	-0.15185	1.5531
1642	-60	-180	-100	1.1	214.442	112.473	112.874	141.985	0	0	0	1.2441	0	0	1.849	1.3389	0	-0.90717	-0.31106	-0.53877	2.1307	1.5154	-1.0438	1.1599	2.121	0.33635	2.7648	1.3458	0.59619	-1.6551	0.4888	-0.89065	-0.80806	-1.0322	-1.4253	-1.6417	-0.87704	0.10466
1643	-60	-180	-100	1.1	263.149	136.699	139.686	196.234	0	0	0	1.4026	0	0	1.9487	1.3518	0	-0.13121	-0.54607	-0.94583	2.2324	1.5645	-1.0403	1.2452	2.1137	0.34887	2.8745	1.3893	0.58371	-0.70674	0.050376	-1.7335	0.69623	-0.98531	-1.5388	-0.9758	-1.3359	-0.93474
1644	-60	-180	-100	2.5	180	57.6608	81.6325	106.107	0	0	0	1.1719	0	0	1.9959	1.2709	0	-2.5	0	0	2.3197	1.437	-1.0279	1.3974	2.1127	0.3512	2.8644	1.1036	0.63368	-3.2847	0.74824	0	-2.2345	-0.47849	-0.92971	-2.2384	-0.48304	0.92851
1645	-60	-180	-100	2.5	90	56.4351	69.3975	105.896	0	0	0	1.1748	0	0	2.0677	1.1878	0	0	1.25	2.1651	2.4006	1.3284	-1.03	1.5261	2.0693	0.34514	2.927	0.97068	0.6322	0.4525	2.2263	2.2885	-1.0793	1.1925	2.1362	0.53511	0.39646	2.5581
1646	-60	-180	-100	2.5	270	56.1645	76.4575	102.628	0	0	0	1.1777	0	0	1.9601	1.2911	0	0	-1.25	-2.1651	2.2757	1.4614	-1.0305	1.3453	2.123	0.34873	2.8379	1.1532	0.62849	-0.54058	-0.44689	-2.6467	1.0776	-1.2806	-2.2184	-0.53737	-2.1373	-1.8617
1647	-60	-180	-100	2.5	116.36	50.8217	62.0336	101.459	0	0	0	1.1746	0	0	1.9987	1.2539	0	-1.11	1.12	1.9399	2.3207	1.4131	-1.0297	1.4039	2.0983	0.35524	2.8735	1.0901	0.62743	-0.88138	2.1703	2.0693	-2.0491	0.84413	1.4843	-0.60283	0.39521	2.5613
1648	-60	-180	-100	2.5	243.64	52.7772	70.2504	98.1801	0	0	0	1.1758	0	0	1.9644	1.2857	0	-1.11	-1.12	-1.9399	2.2811	1.4547	-1.0299	1.3519	2.1186	0.35061	2.8413	1.144	0.62891	-1.5593	-0.15867	-2.1409	-0.20542	-1.4096	-2.4557	-1.6675	-1.8604	-1.3853
1649	-60	-180	-100	2.5	96.8508	53.4758	65.1888	103.514	0	0	0	1.175	0	0	2.0382	1.2143	0	-0.29821	1.2411	2.1496	2.367	1.3635	-1.0296	1.4735	2.0795	0.35155	2.9054	1.0195	0.62916	0.11192	2.2398	2.2327	-1.368	1.1356	2.0381	0.24692	0.42618	2.6055
1650	-60	-180	-100	2.5	145.558	53.6134	68.8286	104.205	0	0	0	1.1735	0	0	1.9946	1.2678	0	-2.0618	0.70696	1.2245	2.3156	1.4294	-1.0295	1.3963	2.1103	0.35139	2.8672	1.1063	0.63025	-2.2807	1.7456	1.4387	-2.5191	0.23899	0.36704	-1.657	0.080968	2.0067
1651	-60	-180	-100	2.5	214.442	55.4435	79.0083	98.1021	0	0	0	1.1731	0	0	1.9743	1.2807	0	-2.0618	-0.70696	-1.2245	2.2948	1.4512	-1.0283	1.3652	2.1151	0.35224	2.8469	1.1281	0.63201	-2.253	0.3548	-1.2395	-1.722	-1.2079	-2.1205	-2.3493	-1.2884	-0.36192
1652	-60	-180	-100	2.5	263.149	54.343	72.5399	100.876	0	0	0	1.1776	0	0	1.9607	1.2897	0	-0.29821	-1.2411	-2.1496	2.2759	1.4588	-1.0307	1.3467	2.1221	0.3493	2.839	1.1519	0.62783	-0.83329	-0.39193	-2.551	0.76813	-1.3242	-2.2971	-0.85567	-2.1079	-1.8245
1653	-60	-180	-100	1.30503	180	51.3697	51.3965	88.9783	0	0	0	1.2209	0	0	1.8639	1.3711	0	-1.305	0	0	2.1653	1.5859	-1.0302	1.1802	2.1497	0.3524	2.7609	1.3225	0.62015	-1.8501	0.98189	0	-1.6987	-0.56783	-0.86377	-1.6902	-0.56146	0.87052
1654	-60	-180	-100	1.30503	90	84.1797	92.7303	113.301	0	0	0	1.3829	0	0	2.2938	1.1329	0	0	0.65251	1.1302	2.6202	1.2457	-1.0419	1.908	2.1065	0.32197	3.1631	0.87377	0.60625	0.47833	1.6343	1.1738	-1.0376	0.87123	1.4688	0.40349	0.089575	1.9917
1655	-60	-180	-100	1.30503	270	69.2984	71.8993	122.656	0	0	0	1.3653	0	0	1.9446	1.3432	0	0	-0.65251	-1.1302	2.2295	1.5401	-1.0418	1.2482	2.1167	0.33833	2.8684	1.3634	0.58622	-0.53006	-0.023313	-1.8766	0.92887	-0.95884	-1.6159	-0.67995	-1.5413	-1.1341
1656	-60	-180	-100	1.30503	116.36	44.7136	45.927	82.8759	0	0	0	1.275	0	0	2.0357	1.2649	0	-0.57945	0.58466	1.0127	2.3306	1.3978	-1.0447	1.502	2.1584	0.34129	2.9498	1.1443	0.58524	-0.36625	1.6628	1.1741	-1.672	0.52682	0.9339	-0.32735	0.079733	1.9557
1657	-60	-180	-100	1.30503	243.64	39.1443	39.584	81.181	0	0	0	1.2671	0	0	1.876	1.3285	0	-0.57945	-0.58466	-1.0127	2.1502	1.4831	-1.0482	1.1913	2.1184	0.33067	2.8018	1.3471	0.58223	-1.1995	0.16646	-1.5278	0.098978	-1.0629	-1.7363	-1.3406	-1.3301	-0.71046
1658	-60	-180	-100	1.30503	96.8508	68.0863	73.1794	101.682	0	0	0	1.3406	0	0	2.2051	1.1729	0	-0.15567	0.64785	1.1221	2.5201	1.2901	-1.0438	1.7778	2.126	0.32978	3.0933	0.95382	0.59523	0.26649	1.6585	1.1882	-1.2256	0.80388	1.3577	0.21976	0.10735	2.0069
1659	-60	-180	-100	1.30503	145.558	45.9707	46.0218	80.7663	0	0	0	1.2338	0	0	1.9205	1.3458	0	-1.0763	0.36904	0.63919	2.2096	1.5086	-1.0408	1.2972	2.1785	0.34487	2.8342	1.2809	0.5949	-1.2755	1.4578	0.84673	-1.9785	-0.0015048	0.13466	-1.0707	-0.13564	1.6159
1660	-60	-180	-100	1.30503	214.442	47.799	48.4912	75.9763	0	0	0	1.2377	0	0	1.8476	1.3433	0	-1.0763	-0.36904	-0.63919	2.1288	1.5176	-1.0436	1.1493	2.1179	0.33427	2.761	1.3471	0.59973	-1.717	0.48563	-0.92584	-0.89626	-0.99251	-1.543	-1.7371	-0.98278	0.0003472
1661	-60	-180	-100	1.30503	263.149	55.4768	56.7057	107.982	0	0	0	1.3259	0	0	1.9226	1.3343	0	-0.15567	-0.64785	-1.1221	2.2017	1.5065	-1.0467	1.2376	2.1218	0.33232	2.8503	1.3539	0.57994	-0.71988	0.013265	-1.8085	0.73086	-0.99621	-1.6551	-0.87487	-1.498	-1.0545
1662	-60	-180	-100	2.29497	180	63.419	83.0927	112.419	0	0	0	1.1739	0	0	2.0044	1.268	0	-2.295	0	0	2.3292	1.4331	-1.0278	1.4104	2.1129	0.35157	2.8722	1.0968	0.6336	-3.0171	0.81144	0	-2.1319	-0.53053	-0.92626	-2.1355	-0.53439	0.92471
1663	-60	-180	-100	2.29497	90	60.567	67.9089	108.806	0	0	0	1.1821	0	0	2.106	1.1504	0	0	1.1475	1.9875	2.4361	1.2703	-1.0336	1.6042	2.0608	0.32925	2.9634	0.9135	0.62819	0.47348	2.1202	2.0321	-1.0748	1.1323	2.1197	0.54173	0.33007	2.4451
1664	-60	-180	-100	2.29497	270	59.4432	71.9643	106.206	0	0	0	1.189	0	0	1.9358	1.3057	0	0	-1.1475	-1.9875	2.244	1.4775	-1.0331	1.3073	2.1295	0.34587	2.8225	1.1955	0.6225	-0.54072	-0.36254	-2.5011	1.0748	-1.1865	-2.08	-0.52564	-2.0752	-1.7998
1665	-60	-180	-100	2.29497	116.36	50.8934	56.4401	101.623	0	0	0	1.1799	0	0	2.0101	1.2403	0	-1.019	1.0282	1.7808	2.3295	1.3903	-1.0318	1.4265	2.0943	0.35407	2.8894	1.0764	0.62206	-0.78964	2.0797	1.9098	-2.0026	0.77459	1.4123	-0.54335	0.32543	2.4523
1666	-60	-180	-100	2.29497	243.64	53.7582	64.5811	98.4923	0	0	0	1.1824	0	0	1.9459	1.2935	0	-1.019	-1.0282	-1.7808	2.2571	1.4628	-1.0318	1.3239	2.1209	0.3492	2.8297	1.1717	0.62426	-1.4929	-0.08754	-2.0232	-0.14126	-1.33	-2.3364	-1.6139	-1.7923	-1.3004
[truncated: 5,549 more rows]

## Sheet: NAC (unrestricted)
Units
	All q_i are in degrees, except q_4, which is in angstroms
	Energy is in kcal/mol, relative to global minimum on S0 (-189.319880798 hartrees)
[truncated: 10,001 more rows]

## Sheet: NAC (restricted)
Units
	All q_i are in degrees, except q_4, which is in angstroms
[truncated: 10,002 more rows]
